# Supplementary material for: The lncRNA SNHG26 drives the inflammatory-to-proliferative state transition of keratinocyte progenitor cells during wound healing
Source: Research Square preprint supplement (doi:10.21203/rs.3.rs-3810067/v1), 2024-03-04
Supplement: Supplementary file 1 [file 10e59b9d04427d0228626597.xlsx]

## Sheet: SNHG26_ASO group enriched peaks
Table S5. Enriched Peaks in ILF2 ChIP sequencing (SNHG26_ASO group)
Peak_IDs	width	annotation	geneStart	geneEnd	geneLength	geneStrand	geneId	transcriptId	distanceToTSS	ENSEMBL	SYMBOL	GENENAME
chr1_4793962_4794260	299	Distal Intergenic	4711155	4712165	1011	1	55966	ENST00000466761.1	82807	ENSG00000196581	AJAP1	adherens junctions associated protein 1
chr1_12563560_12563842	283	Distal Intergenic	12578957	12579023	67	2	102466722	ENST00000622213.1	15181	ENSG00000276830	MIR6730	microRNA 6730
chr1_13488962_13489194	233	Intron (ENST00000376085.4/126755, intron 1 of 1)	13513220	13516270	3051	1	107984918	ENST00000563570.1	-24026	ENSG00000259961	LOC107984918	uncharacterized LOC107984918
chr1_13912195_13912440	246	Intron (ENST00000636564.1/23254, intron 1 of 2)	13892792	15118043	1225252	1	23254	ENST00000636203.1	19403	ENSG00000189337	KAZN	kazrin, periplakin interacting protein
chr1_14078716_14078986	271	Intron (ENST00000636564.1/23254, intron 1 of 2)	14221887	14259698	37812	2	107985468	ENST00000657859.1	180712
chr1_16628388_16628620	233	Promoter (<=1kb)	16618256	16628652	10397	2	84809	ENST00000640476.1	32	ENSG00000215908	CROCCP2	CROCC pseudogene 2
chr1_21319586_21320003	418	Intron (ENST00000415912.6/1889, intron 1 of 18)	21272746	21298999	26254	2	1889	ENST00000481130.6	-20587	ENSG00000117298	ECE1	endothelin converting enzyme 1
chr1_22376052_22376399	348	Distal Intergenic	22428838	22511763	82926	1	9923	ENST00000650433.1	-52439	ENSG00000184677	ZBTB40	zinc finger and BTB domain containing 40
chr1_22568135_22568351	217	Intron (ENST00000166244.8/2046, intron 1 of 16)	22563564	22589621	26058	1	2046	ENST00000374644.8	4571	ENSG00000070886	EPHA8	EPH receptor A8
chr1_34573544_34573777	234	Distal Intergenic	34669599	34669694	96	2	693137	ENST00000385206.1	95917	ENSG00000207941	MIR552	microRNA 552
chr1_35886110_35886508	399	Promoter (2-3kb)	35888605	35921149	32545	1	26523	ENST00000699844.1	-2097	ENSG00000092847	AGO1	argonaute RISC component 1
chr1_41028173_41028538	366	3' UTR	41015597	41023237	7641	2	200172	ENST00000359345.5	-4936	ENSG00000171790	SLFNL1	schlafen like 1
chr1_49787163_49787489	327	Intron (ENST00000371839.6/84871, intron 2 of 13)	49527228	49851518	324291	2	84871	ENST00000497451.1	64029	ENSG00000186094	AGBL4	AGBL carboxypeptidase 4
chr1_51288721_51288987	267	3' UTR	51290092	51296860	6769	2	22996	ENST00000525906.1	7873	ENSG00000085831	TTC39A	tetratricopeptide repeat domain 39A
chr1_56258390_56258703	314	Exon (ENST00000641177.1/ENST00000641177.1, exon 2 of 4)	56414918	56415966	1049	1	105378744	ENST00000451914.3	-156215	ENSG00000223956	LINC01767	long intergenic non-protein coding RNA 1767
chr1_56977375_56977712	338	Promoter (2-3kb)	56929210	56974383	45174	2	732	ENST00000696164.1	-2992	ENSG00000021852	C8B	complement C8 beta chain
chr1_58783658_58784015	358	Promoter (<=1kb)	58780791	58784047	3257	2	3725	ENST00000371222.4	32	ENSG00000177606	JUN	Jun proto-oncogene, AP-1 transcription factor subunit
chr1_65752225_65752538	314	Distal Intergenic	65792514	66374278	581765	1	5142	ENST00000329654.8	-39976	ENSG00000184588	PDE4B	phosphodiesterase 4B
chr1_66614967_66615343	377	Promoter (<=1kb)	66615939	66626105	10167	1	84251	ENST00000484988.2	-596	ENSG00000118473	SGIP1	SH3GL interacting endocytic adaptor 1
chr1_69312256_69312640	385	Distal Intergenic	69215835	69249477	33643	2	105378786	ENST00000650525.1	-62779		LINC02791	long intergenic non-protein coding RNA 2791
chr1_73205070_73205506	437	Distal Intergenic	73305609	73307576	1968	1	101927295	ENST00000661787.1	-100103	ENSG00000233973	LINC01360	long intergenic non-protein coding RNA 1360
chr1_79875278_79875582	305	Distal Intergenic	79325008	79346445	21438	1	107983999	ENST00000645557.1	550270		LINC02792	long intergenic non-protein coding RNA 2792
chr1_91999904_92000263	360	Intron (ENST00000362005.7/676, intron 16 of 19)	91994099	92014420	20322	1	676	ENST00000680194.1	5805	ENSG00000137948	BRDT	bromodomain testis associated
chr1_95944952_95945200	249	Intron (ENST00000442558.5/102723661, intron 1 of 1)	95937901	96022866	84966	1	102723661	ENST00000442558.5	7051	ENSG00000237435	LINC02790	long intergenic non-protein coding RNA 2790
chr1_104458282_104458697	416	Distal Intergenic	104073851	104125845	51995	1	100129138	ENST00000634997.1	384431	ENSG00000215869	LOC100129138	THAP domain containing 3 pseudogene
chr1_104860404_104860683	280	Distal Intergenic	104998406	105032365	33960	2	105378880	ENST00000648518.1	171682		LOC105378880	uncharacterized LOC105378880
chr1_104878494_104879005	512	Distal Intergenic	104998406	105032365	33960	2	105378880	ENST00000648518.1	153360		LOC105378880	uncharacterized LOC105378880
chr1_117680071_117680294	224	Distal Intergenic	117606048	117628389	22342	1	54855	ENST00000369448.4	74023	ENSG00000183508	TENT5C	terminal nucleotidyltransferase 5C
chr1_144101413_144101872	460	Distal Intergenic	143975087	144068350	93264	1	100996712	ENST00000605551.2	126326		SRGAP2D	SLIT-ROBO Rho GTPase activating protein 2D (pseudogene)
chr1_145876712_145876929	218	Exon (ENST00000544626.2/148741, exon 3 of 12)	145866560	145885866	19307	2	148741	ENST00000544626.2	8937	ENSG00000198483	ANKRD35	ankyrin repeat domain 35
chr1_166041638_166042016	379	Distal Intergenic	166081183	166087483	6301	1	105371586	ENST00000366136.2	-39167		FAM78B-AS1	FAM78B antisense RNA 1
chr1_169862702_169863010	309	Exon (ENST00000367771.11/57147, exon 10 of 13)	169853074	169888888	35815	2	57147	ENST00000367770.5	25878	ENSG00000000457	SCYL3	SCY1 like pseudokinase 3
chr1_177777356_177777644	289	Intron (ENST00000664407.1/ENST00000664407.1, intron 1 of 6)	177700548	177710340	9793	1	101928778	ENST00000670282.1	76808	ENSG00000236720	LINC01741	long intergenic non-protein coding RNA 1741
chr1_181741742_181742294	553	Intron (ENST00000367573.7/777, intron 25 of 47)	181732566	181767884	35319	1	777	ENST00000700189.1	9176	ENSG00000198216	CACNA1E	calcium voltage-gated channel subunit alpha1 E
chr1_195359797_195360011	215	Distal Intergenic	195747166	195763425	16260	2	105371672	ENST00000657207.1	403414	ENSG00000287364	LOC105371672	uncharacterized LOC105371672
chr1_204870349_204870661	313	Promoter (<=1kb)	204870604	204945032	74429	1	23114	ENST00000493914.5	0	ENSG00000163531	NFASC	neurofascin
chr1_215011533_215011952	420	Intron (ENST00000486921.5/3776, intron 1 of 6)	215005855	215235219	229365	1	3776	ENST00000391895.6	5678	ENSG00000082482	KCNK2	potassium two pore domain channel subfamily K member 2
chr1_215182120_215182509	390	Intron (ENST00000486921.5/3776, intron 4 of 6)	215083517	215169265	85749	1	3776	ENST00000457122.1	98603	ENSG00000082482	KCNK2	potassium two pore domain channel subfamily K member 2
chr1_223618952_223619468	517	Exon (ENST00000366872.10/388743, exon 9 of 21)	223622622	223628705	6084	2	388743	ENST00000465098.1	9237	ENSG00000203697	CAPN8	calpain 8
chr1_226385958_226386208	251	Promoter (<=1kb)	226362218	226386797	24580	2	142	ENST00000677374.1	589	ENSG00000143799	PARP1	poly(ADP-ribose) polymerase 1
chr1_227828795_227829141	347	Intron (ENST00000366757.4/339501, intron 3 of 4)	227815675	227846470	30796	1	339501	ENST00000366757.4	13120	ENSG00000185888	PRSS38	serine protease 38
chr1_228968888_228969194	307	Distal Intergenic	229022773	229038274	15502	2	105373158	ENST00000632635.1	69080		LINC02815	long intergenic non-protein coding RNA 2815
chr1_233128842_233129193	352	Intron (ENST00000258229.14/80003, intron 21 of 33)	233089851	233135188	45338	2	80003	ENST00000484041.5	5995	ENSG00000135749	PCNX2	pecanex 2
chr1_244265837_244266260	424	Distal Intergenic	244308554	244325177	16624	2	105373262	ENST00000689658.2	58917		LOC105373262	uncharacterized LOC105373262
chr1_247454179_247454403	225	5' UTR	247449118	247458008	8891	2	127623	ENST00000641613.1	3605	ENSG00000177535	OR2B11	olfactory receptor family 2 subfamily B member 11
chr10_815085_815378	294	Promoter (<=1kb)	814018	815715	1698	2	23185	ENST00000469487.2	337	ENSG00000107929	LARP4B	La ribonucleoprotein 4B
chr10_1020634_1020865	232	Promoter (1-2kb)	1022618	1044208	21591	1	55853	ENST00000428780.4	-1753	ENSG00000232656	IDI2-AS1	IDI2 antisense RNA 1
chr10_1759938_1760333	396	Distal Intergenic	1177313	1737525	560213	2	105	ENST00000381312.6	-22413	ENSG00000185736	ADARB2	adenosine deaminase RNA specific B2 (inactive)
chr10_2256262_2256656	395	Distal Intergenic	2305083	2315075	9993	2	399708	ENST00000418295.1	58419		LINC00701	long intergenic non-protein coding RNA 701
chr10_2772466_2772723	258	Distal Intergenic	2446253	2502200	55948	2	105376351	ENST00000658961.1	-270266		LINC02645	long intergenic non-protein coding RNA 2645
chr10_5832922_5833155	234	Intron (ENST00000380127.5/2665, intron 1 of 6)	5786006	5842132	56127	2	2665	ENST00000380127.5	8977	ENSG00000057608	GDI2	GDP dissociation inhibitor 2
chr10_6328136_6328431	296	Promoter (2-3kb)	6330618	6335976	5359	1	399715	ENST00000670319.1	-2187	ENSG00000215244	LINC02649	long intergenic non-protein coding RNA 2649
chr10_8101934_8102157	224	Distal Intergenic	8058399	8074064	15666	1	2625	ENST00000461472.1	43535	ENSG00000107485	GATA3	GATA binding protein 3
chr10_11403175_11403420	246	Distal Intergenic	11316833	11319884	3052	2	414196	ENST00000379256.4	-83291	ENSG00000181800	CELF2-AS1	CELF2 antisense RNA 1
chr10_35700579_35700853	275	Distal Intergenic	35638247	35642296	4050	2	8325	ENST00000374694.3	-58283	ENSG00000177283	FZD8	frizzled class receptor 8
chr10_44070353_44070680	328	Distal Intergenic	43943093	43944486	1394	1	283033	ENST00000664261.1	127260		LINC00841	long intergenic non-protein coding RNA 841
chr10_47264856_47265150	295	Distal Intergenic	47300197	47313577	13381	1	2662	ENST00000580279.2	-35047	ENSG00000266524	GDF10	growth differentiation factor 10
chr10_52314279_52314598	320	Promoter (<=1kb)	52252059	52314507	62449	2	100506939	ENST00000649494.1	0		PRKG1-AS1	PRKG1 antisense RNA 1
chr10_53992143_53992409	267	Intron (ENST00000644397.2/65217, intron 21 of 37)	53821276	53907217	85942	2	65217	ENST00000463095.2	-84926	ENSG00000150275	PCDH15	protocadherin related 15
chr10_64618763_64618986	224	Intron (ENST00000654191.1/ENST00000654191.1, intron 4 of 5)	64825572	64826579	1008	1	305	ENST00000404883.2	-206586		ANXA2P3	annexin A2 pseudogene 3
chr10_67737986_67738292	307	Intron (ENST00000684154.1/29119, intron 1 of 17)	65912457	67763637	1851181	2	29119	ENST00000684154.1	25345	ENSG00000183230	CTNNA3	catenin alpha 3
chr10_70354919_70355265	347	Intron (ENST00000395011.5/55222, intron 2 of 3)	70298970	70376779	77810	2	55222	ENST00000395011.5	21514	ENSG00000172731	LRRC20	leucine rich repeat containing 20
chr10_71703706_71704075	370	Intron (ENST00000224721.12/64072, intron 24 of 69)	71712604	71742036	29433	1	64072	ENST00000398792.3	-8529	ENSG00000107736	CDH23	cadherin related 23
chr10_73867141_73867368	228	Intron (ENST00000351293.7/818, intron 2 of 18)	73847323	73871580	24258	2	818	ENST00000700403.1	4212	ENSG00000148660	CAMK2G	calcium/calmodulin dependent protein kinase II gamma
chr10_79422729_79423135	407	Intron (ENST00000372336.4/219654, intron 2 of 3)	79386037	79444219	58183	2	219654	ENST00000372333.3	21084	ENSG00000165424	ZCCHC24	zinc finger CCHC-type containing 24
chr10_80602963_80603199	237	Intron (ENST00000339284.6/387694, intron 4 of 6)	80607299	80646558	39260	1	387694	ENST00000372150.7	-4100	ENSG00000178217	SH2D4B	SH2 domain containing 4B
chr10_86326854_86327069	216	Intron (ENST00000327946.12/2894, intron 2 of 15)	85601994	86366493	764500	2	2894	ENST00000464741.2	39424	ENSG00000182771	GRID1	glutamate ionotropic receptor delta type subunit 1
chr10_89898780_89899247	468	Intron (ENST00000664430.1/105378425, intron 1 of 3)	89888930	89914948	26019	1	105378425	ENST00000692187.1	9850	ENSG00000280560	LINC01374	long intergenic non-protein coding RNA 1374
chr10_96726168_96726493	326	Distal Intergenic	96593315	96720514	127200	2	118788	ENST00000339364.10	-5654	ENSG00000155629	PIK3AP1	phosphoinositide-3-kinase adaptor protein 1
chr10_102475575_102475834	260	Exon (ENST00000238936.8/79847, exon 10 of 10)	102471026	102472247	1222	1	79847	ENST00000469294.1	4549	ENSG00000138111	MFSD13A	major facilitator superfamily domain containing 13A
chr10_104480975_104481306	332	Promoter (<=1kb)	104474939	104480274	5336	2	101927523	ENST00000447860.1	-701	ENSG00000225768	LINC02620	long intergenic non-protein coding RNA 2620
chr10_107899047_107899466	420	Intron (ENST00000630847.2/103695365, intron 3 of 5)	108040383	108040699	317	2	103695365	ENST00000622852.1	141233	ENSG00000229981	LINC01435	long intergenic non-protein coding RNA 1435
chr10_126407050_126407295	246	Distal Intergenic	126413869	126421879	8011	2	101101772	ENST00000456514.1	14584	ENSG00000235180	LINC00601	long intergenic non-protein coding RNA 601
chr10_127429613_127429955	343	Intron (ENST00000280333.9/1793, intron 47 of 51)	127549309	127553540	4232	1	594857	ENST00000398023.3	-119354	ENSG00000214285	NPS	neuropeptide S
chr10_128952304_128952554	251	Distal Intergenic	128912879	128916271	3393	1	728327	ENST00000446589.1	39425	ENSG00000224190	LINC02667	long intergenic non-protein coding RNA 2667
chr10_130275175_130275432	258	Intron (ENST00000648275.1/107984002, intron 1 of 1)	130213527	130483193	269667	1	107984002	ENST00000648275.1	61648		LINC02646	long intergenic non-protein coding RNA 2646
chr10_130381437_130381874	438	Intron (ENST00000648275.1/107984002, intron 1 of 1)	130213527	130483193	269667	1	107984002	ENST00000648275.1	167910		LINC02646	long intergenic non-protein coding RNA 2646
chr10_133196376_133196741	366	Intron (ENST00000304613.8/85442, intron 10 of 29)	133207137	133210724	3588	1	85442	ENST00000682309.1	-10396	ENSG00000171798	KNDC1	kinase non-catalytic C-lobe domain containing 1
chr11_5514902_5515248	347	Promoter (1-2kb)	5514393	5516699	2307	2	143630	ENST00000380184.2	1451	ENSG00000175518	UBQLNL	ubiquilin like
chr11_9455254_9455531	278	Distal Intergenic	9460319	9478424	18106	1	7702	ENST00000531943.5	-4788	ENSG00000166478	ZNF143	zinc finger protein 143
chr11_15407748_15407962	215	Distal Intergenic	15552855	15591098	38244	1	105376569	ENST00000527770.1	-144893	ENSG00000254946	LINC02751	long intergenic non-protein coding RNA 2751
chr11_16248377_16248633	257	Intron (ENST00000316399.10/55553, intron 2 of 14)	16186781	16252536	65756	2	55553	ENST00000531297.1	3903	ENSG00000110693	SOX6	SRY-box transcription factor 6
chr11_26983731_26984019	289	Distal Intergenic	26994112	26997087	2976	1	387758	ENST00000318627.4	-10093	ENSG00000176971	FIBIN	fin bud initiation factor homolog
chr11_29560028_29560256	229	Intron (ENST00000525097.1/105376605, intron 1 of 3)	29335878	29594295	258418	2	105376605	ENST00000525097.1	34039		LINC02755	long intergenic non-protein coding RNA 2755
chr11_37145426_37145703	278	Distal Intergenic	36671919	36675695	3777	1	107984325	ENST00000679127.1	473507		LOC107984325	uncharacterized LOC107984325
chr11_39652180_39652398	219	Distal Intergenic	40116170	40241883	125714	2	57689	ENST00000533474.1	589485	ENSG00000148948	LRRC4C	leucine rich repeat containing 4C
chr11_41056859_41057092	234	Intron (ENST00000528697.6/57689, intron 1 of 6)	40648224	41459636	811413	2	57689	ENST00000534577.1	402544	ENSG00000148948	LRRC4C	leucine rich repeat containing 4C
chr11_46401558_46401818	261	Intron (ENST00000314845.7/55626, intron 18 of 18)	46383789	46391776	7988	2	1132	ENST00000682254.1	-9782	ENSG00000180720	CHRM4	cholinergic receptor muscarinic 4
chr11_55297940_55298212	273	Promoter (<=1kb)	55295406	55298232	2827	2	440041	ENST00000526016.1	20		TRIM51HP	tripartite motif-containing 51H, pseudogene
chr11_62840943_62841743	801	Promoter (<=1kb)	62832912	62841809	8898	2	54663	ENST00000525239.5	66	ENSG00000133316	WDR74	WD repeat domain 74
chr11_69001534_69001747	214	Exon (ENST00000562276.1/ENST00000562276.1, exon 1 of 1)	69012283	69014066	1784	1	101928200	ENST00000569432.1	-10536	ENSG00000256508	MRGPRF-AS1	MRGPRF antisense RNA 1
chr11_69115869_69116106	238	Intron (ENST00000637504.1/219931, intron 19 of 19)	69083176	69083258	83	1	100422846	ENST00000581178.1	32693	ENSG00000265539	MIR3164	microRNA 3164
chr11_69892989_69893350	362	Distal Intergenic	69809968	69819416	9449	2	2248	ENST00000334134.4	-73573	ENSG00000186895	FGF3	fibroblast growth factor 3
chr11_70696028_70696271	244	Promoter (2-3kb)	70644030	70698766	54737	2	22941	ENST00000686462.1	2495	ENSG00000162105	SHANK2	SH3 and multiple ankyrin repeat domains 2
chr11_72477583_72477823	241	Distal Intergenic	72293303	72434680	141378	2	81570	ENST00000535990.6	-42903	ENSG00000162129	CLPB	caseinolytic mitochondrial matrix peptidase chaperone subunit B
chr11_75170623_75170997	375	Intron (ENST00000526660.5/11309, intron 1 of 2)	75165874	75170004	4131	1	11309	ENST00000526839.1	4749	ENSG00000137491	SLCO2B1	solute carrier organic anion transporter family member 2B1
chr11_77151650_77151915	266	Intron (ENST00000409709.9/4647, intron 4 of 48)	77138185	77142822	4638	1	4647	ENST00000660626.1	13465	ENSG00000137474	MYO7A	myosin VIIA
chr11_94599628_94600006	379	Intron (ENST00000543336.5/143689, intron 11 of 13)	94617789	94621113	3325	1	143689	ENST00000537419.1	-17783	ENSG00000134627	PIWIL4	piwi like RNA-mediated gene silencing 4
chr11_108965792_108966017	226	Distal Intergenic	108929519	108940925	11407	1	1662	ENST00000534221.1	36273	ENSG00000178105	DDX10	DEAD-box helicase 10
chr11_112817371_112817623	253	Distal Intergenic	112822806	112835124	12319	2	105369498	ENST00000669768.1	17501		LOC105369498	uncharacterized LOC105369498
chr11_120595844_120596095	252	Intron (ENST00000638419.1/2900, intron 1 of 20)	120575799	120815438	239640	1	107984400	ENST00000526536.1	20045		LOC107984400	uncharacterized LOC107984400
chr11_122897068_122897292	225	Intron (ENST00000307257.10/79864, intron 2 of 3)	122885758	122959798	74041	1	79864	ENST00000531316.1	11310	ENSG00000109944	JHY	junctional cadherin complex regulator
chr11_124734511_124734812	302	Distal Intergenic	124739942	124747210	7269	1	4900	ENST00000284292.11	-5130	ENSG00000154146	NRGN	neurogranin
chr11_126090475_126090773	299	Distal Intergenic	125955796	126063335	107540	2	50937	ENST00000684078.1	-27140	ENSG00000064309	CDON	cell adhesion associated, oncogene regulated
chr11_129573594_129573868	275	Distal Intergenic	129612116	129617269	5154	2	101929557	ENST00000631195.1	43401	ENSG00000281097	LINC01395	long intergenic non-protein coding RNA 1395
chr11_131613829_131614276	448	Intron (ENST00000374791.7/50863, intron 1 of 7)	131582011	131661048	79038	1	50863	ENST00000416661.1	31818	ENSG00000182667	NTM	neurotrimin
chr11_131954176_131954442	267	Intron (ENST00000374791.7/50863, intron 2 of 7)	131911468	132315070	403603	1	50863	ENST00000374784.5	42708	ENSG00000182667	NTM	neurotrimin
chr11_133060521_133060898	378	Intron (ENST00000524381.6/4978, intron 1 of 7)	132420020	132943768	523749	2	4978	ENST00000374778.4	-116753	ENSG00000183715	OPCML	opioid binding protein/cell adhesion molecule like
chr11_134450175_134450499	325	Intron (ENST00000661684.1/283177, intron 1 of 3)	134436735	134505173	68439	1	283177	ENST00000533390.6	13440	ENSG00000255545	B3GAT1-DT	B3GAT1 divergent transcript
chr12_1505479_1505844	366	Distal Intergenic	1500525	1504424	3900	1	100292680	ENST00000515614.3	4954	ENSG00000249628	LINC00942	long intergenic non-protein coding RNA 942
chr12_2849048_2849605	558	3' UTR	2849046	2857039	7994	2	101929469	ENST00000637658.2	7434	ENSG00000283297	TEX52	testis expressed 52
chr12_21589890_21590188	299	Intron (ENST00000261195.3/2998, intron 1 of 15)	21536107	21604847	68741	2	2998	ENST00000261195.3	14659	ENSG00000111713	GYS2	glycogen synthase 2
chr12_55034379_55034602	224	Distal Intergenic	55019974	55030017	10044	1	58158	ENST00000242994.4	14405	ENSG00000123307	NEUROD4	neuronal differentiation 4
chr12_61023231_61023453	223	Distal Intergenic	61668302	61702771	34470	2	105369793	ENST00000668912.1	679318		LOC105369793	uncharacterized LOC105369793
chr12_63098555_63098954	400	Distal Intergenic	63145234	63150179	4946	2	552	ENST00000550940.1	51225	ENSG00000166148	AVPR1A	arginine vasopressin receptor 1A
chr12_64946484_64946700	217	Intron (ENST00000674281.1/23329, intron 16 of 16)	64920845	64982524	61680	2	109729131	ENST00000510459.2	35824	ENSG00000248995	LINC02231	long intergenic non-protein coding RNA 2231
chr12_69186968_69187204	237	Distal Intergenic	69239569	69274358	34790	1	11052	ENST00000435070.7	-52365	ENSG00000111605	CPSF6	cleavage and polyadenylation specific factor 6
chr12_72507790_72508254	465	Intron (ENST00000547300.2/29953, intron 2 of 4)	72560539	72618952	58414	1	29953	ENST00000549138.5	-52285	ENSG00000072657	TRHDE	thyrotropin releasing hormone degrading enzyme
chr12_81083523_81083768	246	Intron (ENST00000549175.1/79611, intron 2 of 3)	81078079	81261210	183132	1	79611	ENST00000548058.6	5444	ENSG00000111058	ACSS3	acyl-CoA synthetase short chain family member 3
chr12_95340720_95340993	274	Intron (ENST00000692754.2/ENST00000692754.2, intron 1 of 1)	95309923	95309984	62	1	100500802	ENST00000579373.1	30797	ENSG00000265917	MIR3685	microRNA 3685
chr12_96539306_96539640	335	Promoter (<=1kb)	96540137	96644210	104074	1	144535	ENST00000554108.6	-497	ENSG00000188596	CFAP54	cilia and flagella associated protein 54
chr12_106695959_106696188	230	Intron (ENST00000392842.6/5992, intron 7 of 17)	106684808	106709389	24582	1	5992	ENST00000552917.1	11151	ENSG00000111783	RFX4	regulatory factor X4
chr12_108624183_108624436	254	5' UTR	108628668	108642349	13682	1	105369968	ENST00000664158.1	-4232		LOC105369968	uncharacterized LOC105369968
chr12_109535264_109535608	345	3' UTR	109529930	109534538	4609	1	89910	ENST00000605142.1	5334	ENSG00000151148	UBE3B	ubiquitin protein ligase E3B
chr12_110858729_110858950	222	Exon (ENST00000550317.1/160762, exon 2 of 4)	110847027	110907535	60509	1	160762	ENST00000552694.1	11702	ENSG00000173093	CCDC63	coiled-coil domain containing 63
chr12_113881096_113881329	234	Intron (ENST00000545145.6/9904, intron 21 of 24)	113822687	113858904	36218	2	9904	ENST00000552384.1	-22192	ENSG00000122965	RBM19	RNA binding motif protein 19
chr12_119759022_119759369	348	Intron (ENST00000261833.11/11113, intron 19 of 46)	119730495	119752095	21601	2	11113	ENST00000546026.2	-6927	ENSG00000122966	CIT	citron rho-interacting serine/threonine kinase
chr12_120656021_120656284	264	Promoter (<=1kb)	120655299	120667324	12026	1	9478	ENST00000453000.1	722	ENSG00000157782	CABP1	calcium binding protein 1
chr12_122865358_122865652	295	3' UTR	122860165	122862084	1920	1	9026	ENST00000535012.1	5193	ENSG00000130787	HIP1R	huntingtin interacting protein 1 related
chr12_125297260_125297475	216	Intron (ENST00000682704.1/114795, intron 1 of 8)	125326551	125349778	23228	1	114795	ENST00000535330.1	-29076	ENSG00000139364	TMEM132B	transmembrane protein 132B
chr12_127459822_127460256	435	Distal Intergenic	127486938	127533242	46305	1	105370067	ENST00000653590.1	-26682		LOC105370067	uncharacterized LOC105370067
chr12_128052769_128053240	472	Exon (ENST00000666596.1/ENST00000666596.1, exon 3 of 3)	128023788	128027166	3379	2	105370070	ENST00000543651.1	-25603	ENSG00000256643	LINC02441	long intergenic non-protein coding RNA 2441
chr12_129990640_129990883	244	Distal Intergenic	130033454	130042342	8889	2	100190940	ENST00000291374.11	51459	ENSG00000214039	LINC02418	long intergenic non-protein coding RNA 2418
chr13_21875706_21875982	277	Promoter (<=1kb)	21872792	21876665	3874	2	100874182	ENST00000654346.1	683	ENSG00000226722	LINC00424	long intergenic non-protein coding RNA 424
chr13_21901469_21901978	510	Distal Intergenic	21872764	21878256	5493	2	100874182	ENST00000669854.1	-23213	ENSG00000226722	LINC00424	long intergenic non-protein coding RNA 424
chr13_30471839_30472121	283	Intron (ENST00000648233.2/ENST00000648233.2, intron 2 of 3)	30461496	30465938	4443	2	3146	ENST00000326004.4	-5901	ENSG00000189403	HMGB1	high mobility group box 1
chr13_31653144_31653409	266	Distal Intergenic	31739526	31803389	63864	1	122042	ENST00000298386.7	-86117	ENSG00000133105	RXFP2	relaxin family peptide receptor 2
chr13_35251092_35251440	349	Exon (ENST00000453244.1/ENST00000453244.1, exon 1 of 1)	35209779	35295049	85271	1	26960	ENST00000689818.1	41313	ENSG00000172915	NBEA	neurobeachin
chr13_40338152_40338492	341	Intron (ENST00000638084.1/646982, intron 2 of 5)	40203617	40350313	146697	2	400123	ENST00000637438.1	11821	ENSG00000215483	LINC00548	long intergenic non-protein coding RNA 548
chr13_62446070_62446358	289	Distal Intergenic	62323657	62328833	5177	1	100874180	ENST00000431656.1	122413	ENSG00000229307	LINC00459	long intergenic non-protein coding RNA 459
chr13_66646817_66647293	477	Intron (ENST00000377865.7/5101, intron 3 of 4)	66825169	66915031	89863	1	100874064	ENST00000419371.2	-177876	ENSG00000228842	PCDH9-AS2	PCDH9 antisense RNA 2
chr13_74610520_74611187	668	Distal Intergenic	74553965	74555522	1558	1	338864	ENST00000601480.1	56555	ENSG00000236678	LINC00347	long intergenic non-protein coding RNA 347
chr13_78845299_78845589	291	Distal Intergenic	78786476	78840051	53576	2	100874126	ENST00000666610.1	-5248		LINC00331	long intergenic non-protein coding RNA 331
chr13_83516734_83516993	260	Distal Intergenic	83877205	83882393	5189	2	114798	ENST00000377084.3	365400	ENSG00000178235	SLITRK1	SLIT and NTRK like family member 1
chr13_86409879_86410101	223	Intron (ENST00000666285.1/105370299, intron 1 of 1)	86402982	86462734	59753	2	105370299	ENST00000666285.1	52633		LOC105370299	uncharacterized LOC105370299
chr13_93132153_93132401	249	Distal Intergenic	93056657	93057926	1270	1	104326053	ENST00000443228.1	75496		LINC00363	long intergenic non-protein coding RNA 363
chr13_96517172_96517455	284	Intron (ENST00000376705.4/266722, intron 1 of 1)	96427229	96427292	64	1	100616137	ENST00000635771.1	89943	ENSG00000283487	MIR4501	microRNA 4501
chr13_98871728_98871977	250	Exon (ENST00000619393.1/ENST00000619393.1, exon 1 of 1)	98845948	98860476	14529	2	23348	ENST00000472874.1	-11252	ENSG00000088387	DOCK9	dedicator of cytokinesis 9
chr13_100525203_100525544	342	Intron (ENST00000376279.7/5095, intron 21 of 22)	100532514	100533653	1140	2	87769	ENST00000464500.5	8109	ENSG00000134864	GGACT	gamma-glutamylamine cyclotransferase
chr13_110476376_110476652	277	Promoter (1-2kb)	110477923	110513027	35105	1	1284	ENST00000650225.1	-1271	ENSG00000134871	COL4A2	collagen type IV alpha 2 chain
chr13_111302219_111302549	331	Intron (ENST00000646102.2/8874, intron 21 of 21)	111316184	111344249	28066	1	121793	ENST00000497241.5	-13635	ENSG00000153495	TEX29	testis expressed 29
chr13_113840715_113840944	230	Exon (ENST00000458001.2/650669, exon 5 of 5)	113820552	113836044	15493	2	2621	ENST00000610073.1	-4671	ENSG00000183087	GAS6	growth arrest specific 6
chr14_22670569_22670849	281	Distal Intergenic	22630929	22644352	13424	2	79549	ENST00000540461.2	-26217	ENSG00000255804	OR6J1	olfactory receptor family 6 subfamily J member 1
chr14_22884324_22885070	747	Promoter (1-2kb)	22883222	22887678	4457	1	161253	ENST00000267396.9	1102	ENSG00000139890	REM2	RRAD and GEM like GTPase 2
chr14_24607779_24608206	428	Promoter (1-2kb)	24606485	24609667	3183	2	2999	ENST00000557220.6	1461	ENSG00000100450	GZMH	granzyme H
chr14_38321075_38321326	252	Intron (ENST00000655453.1/112268136, intron 3 of 3)	38290953	38311930	20978	1	112268136	ENST00000555636.1	30122		LOC112268136	uncharacterized LOC112268136
chr14_40570798_40571082	285	Distal Intergenic	40630006	40905513	275508	1	105370467	ENST00000651539.1	-58924		LOC105370467	uncharacterized LOC105370467
chr14_41185700_41186117	418	Distal Intergenic	40954898	40975877	20980	1	644919	ENST00000515218.2	230802		LINC02315	long intergenic non-protein coding RNA 2315
chr14_41825121_41825424	304	Intron (ENST00000298119.9/145581, intron 2 of 5)	41699427	41904549	205123	1	145581	ENST00000554171.1	125694	ENSG00000165379	LRFN5	leucine rich repeat and fibronectin type III domain containing 5
chr14_62029153_62029445	293	Intron (ENST00000683842.1/83851, intron 3 of 7)	61995834	62101713	105880	1	83851	ENST00000555409.1	33319	ENSG00000139973	SYT16	synaptotagmin 16
chr14_75319850_75320094	245	Distal Intergenic	75294446	75298109	3664	1	731223	ENST00000665235.1	25404		LINC01220	long intergenic non-protein coding RNA 1220
chr14_76099783_76100039	257	Distal Intergenic	76058324	76059610	1287	1	112752	ENST00000554233.1	41459	ENSG00000119650	IFT43	intraflagellar transport 43
chr14_90022087_90022575	489	Intron (ENST00000554976.5/55775, intron 16 of 17)	89985159	90033616	48458	1	55775	ENST00000556063.1	36928	ENSG00000042088	TDP1	tyrosyl-DNA phosphodiesterase 1
chr14_92646226_92646601	376	Intron (ENST00000216487.12/79890, intron 5 of 9)	92650918	92652115	1198	1	79890	ENST00000553992.1	-4317	ENSG00000100599	RIN3	Ras and Rab interactor 3
chr14_94733685_94733921	237	Distal Intergenic	94768223	94770113	1891	2	145258	ENST00000238558.5	36192	ENSG00000133937	GSC	goosecoid homeobox
chr14_95081756_95081978	223	Distal Intergenic	95088665	95091322	2658	2	23405	ENST00000527416.2	9344	ENSG00000100697	DICER1	dicer 1, ribonuclease III
chr14_96761221_96761462	242	Intron (ENST00000650059.1/105370646, intron 3 of 4)	96741191	96790613	49423	1	105370646	ENST00000556669.1	20030	ENSG00000258979	LINC02299	long intergenic non-protein coding RNA 2299
chr14_97395120_97395403	284	Distal Intergenic	97427071	97581603	154533	1	101929241	ENST00000655920.1	-31668	ENSG00000246084	LINC02325	long intergenic non-protein coding RNA 2325
chr14_104240921_104241171	251	Intron (ENST00000553757.1/145195, intron 1 of 2)	104223655	104244622	20968	1	145195	ENST00000662137.1	17266	ENSG00000258913	LINC02691	long intergenic non-protein coding RNA 2691
chr14_105171114_105171468	355	Promoter (2-3kb)	105172938	105173697	760	2	256281	ENST00000550912.1	2229	ENSG00000183828	NUDT14	nudix hydrolase 14
chr15_26895623_26895970	348	Intron (ENST00000355395.9/2558, intron 5 of 9)	26880543	26883413	2871	1	2558	ENST00000554083.1	15080	ENSG00000186297	GABRA5	gamma-aminobutyric acid type A receptor subunit alpha5
chr15_26941728_26941973	246	Promoter (2-3kb)	26543552	26939539	395988	2	2562	ENST00000541819.6	-2189	ENSG00000166206	GABRB3	gamma-aminobutyric acid type A receptor subunit beta3
chr15_44956523_44956818	296	Promoter (<=1kb)	44956687	44979229	22543	1	145645	ENST00000340827.4	0	ENSG00000167014	TERB2	telomere repeat binding bouquet formation protein 2
chr15_51181304_51181589	286	Intron (ENST00000559909.1/109729174, intron 1 of 2)	51212259	51215224	2966	2	1588	ENST00000559653.1	33635	ENSG00000137869	CYP19A1	cytochrome P450 family 19 subfamily A member 1
chr15_69096239_69096551	313	Intron (ENST00000559870.2/283673, intron 3 of 4)	69080879	69099987	19109	1	283673	ENST00000559870.2	15360	ENSG00000212766	EWSAT1	Ewing sarcoma associated transcript 1
chr15_77114423_77114641	219	Exon (ENST00000560626.6/79834, exon 7 of 7)	77046332	77083984	37653	2	10099	ENST00000558745.5	-30439	ENSG00000140391	TSPAN3	tetraspanin 3
chr15_79144136_79144445	310	Intron (ENST00000692103.1/729911, intron 2 of 2)	78959906	79090780	130875	2	5923	ENST00000558480.7	-53356	ENSG00000058335	RASGRF1	Ras protein specific guanine nucleotide releasing factor 1
chr15_91780822_91781188	367	Distal Intergenic	91853708	92165903	312196	1	28232	ENST00000318445.11	-72520	ENSG00000176463	SLCO3A1	solute carrier organic anion transporter family member 3A1
chr15_92169409_92169824	416	Intron (ENST00000424469.2/28232, intron 10 of 10)	92153563	92163208	9646	1	28232	ENST00000555513.1	15846	ENSG00000176463	SLCO3A1	solute carrier organic anion transporter family member 3A1
chr16_301918_302147	230	Intron (ENST00000461023.5/8312, intron 4 of 7)	288190	293536	5347	2	8312	ENST00000457798.1	-8382	ENSG00000103126	AXIN1	axin 1
chr16_926058_926277	220	Intron (ENST00000567820.1/101929387, intron 1 of 1)	921073	934495	13423	1	101929387	ENST00000569574.1	4985	ENSG00000260439	LMF1-AS1	LMF1 antisense RNA 1
chr16_3518766_3519008	243	Promoter (<=1kb)	3519969	3536470	16502	1	23059	ENST00000572632.1	-961	ENSG00000103351	CLUAP1	clusterin associated protein 1
chr16_12566417_12567102	686	Intron (ENST00000566228.6/92017, intron 20 of 20)	12556353	12557694	1342	2	105371085	ENST00000563116.1	-8723		LOC105371085	uncharacterized LOC105371085
chr16_12836573_12836789	217	Distal Intergenic	12659799	12803887	144089	2	55313	ENST00000381774.9	-32686	ENSG00000103381	CPPED1	calcineurin like phosphoesterase domain containing 1
chr16_17850836_17851162	327	Distal Intergenic	17933189	17972542	39354	2	107984893	ENST00000569048.5	121380	ENSG00000259929	LOC107984893	uncharacterized LOC107984893
chr16_19345097_19345511	415	Intron (ENST00000563613.1/105371114, intron 4 of 4)	19334011	19337804	3794	1	105371113	ENST00000648468.1	11086	ENSG00000285869	LINC02858	long intergenic non-protein coding RNA 2858
chr16_28025732_28026015	284	Intron (ENST00000447459.7/146395, intron 1 of 6)	27823876	28063188	239313	2	146395	ENST00000562611.1	37173	ENSG00000169181	GSG1L	GSG1 like
chr16_35525987_35526373	387	Distal Intergenic	35504370	35506567	2198	2	100130700	ENST00000662587.1	-19420		TP53TG3HP	TP53 target 3 family member H, pseudogene
chr16_49339559_49339775	217	Intron (ENST00000623424.2/102724859, intron 2 of 4)	49373804	49399431	25628	1	123970	ENST00000299191.4	-34029	ENSG00000166152	C16orf78	chromosome 16 open reading frame 78
chr16_50617037_50617265	229	Intron (ENST00000268459.6/85407, intron 4 of 9)	50625225	50633222	7998	1	85407	ENST00000566396.1	-7960	ENSG00000140807	NKD1	NKD inhibitor of WNT signaling pathway 1
chr16_66471471_66471688	218	Promoter (1-2kb)	66469714	66493529	23816	1	146227	ENST00000563075.1	1757	ENSG00000166546	BEAN1	brain expressed associated with NEDD4 1
chr16_79917829_79918175	347	Distal Intergenic	79798050	79827150	29101	2	104266962	ENST00000567966.1	-90679		LINC01228	long intergenic non-protein coding RNA 1228
chr16_83231410_83231633	224	Intron (ENST00000268613.14/1012, intron 6 of 14)	83383007	83397987	14981	2	105371368	ENST00000564635.1	166354		CDH13-AS1	CDH13 antisense RNA 1
chr16_83350017_83350284	268	Intron (ENST00000268613.14/1012, intron 7 of 14)	83383007	83397987	14981	2	105371368	ENST00000564635.1	47703		CDH13-AS1	CDH13 antisense RNA 1
chr16_84171426_84171711	286	Intron (ENST00000570298.5/123872, intron 8 of 10)	84175763	84177918	2156	1	123872	ENST00000562024.1	-4052	ENSG00000154099	DNAAF1	dynein axonemal assembly factor 1
chr16_84440365_84440580	216	Promoter (1-2kb)	84439039	84440892	1854	1	9914	ENST00000564099.1	1326	ENSG00000064270	ATP2C2	ATPase secretory pathway Ca2+ transporting 2
chr17_2992585_2992846	262	Promoter (1-2kb)	2991345	3008090	16746	1	23108	ENST00000574515.1	1240	ENSG00000132359	RAP1GAP2	RAP1 GTPase activating protein 2
chr17_8527447_8527733	287	Intron (ENST00000379980.8/4628, intron 16 of 41)	8520924	8521519	596	2	4628	ENST00000469865.1	-5928	ENSG00000133026	MYH10	myosin heavy chain 10
chr17_8810942_8811365	424	Intron (ENST00000619866.5/146850, intron 18 of 19)	8797110	8799365	2256	2	162387	ENST00000329805.6	-11577	ENSG00000185156	MFSD6L	major facilitator superfamily domain containing 6 like
chr17_12322377_12322596	220	Distal Intergenic	12124299	12143730	19432	1	6416	ENST00000536413.2	198078	ENSG00000065559	MAP2K4	mitogen-activated protein kinase kinase 4
chr17_12419495_12420003	509	Distal Intergenic	12549764	12591218	41455	1	284034	ENST00000660226.2	-129761	ENSG00000179136	LINC00670	long intergenic non-protein coding RNA 670
chr17_15503940_15504160	221	Promoter (<=1kb)	15438158	15503608	65451	2	284040	ENST00000524205.3	-332	ENSG00000239704	CDRT4	CMT1A duplicated region transcript 4
chr17_17171071_17171319	249	Promoter (<=1kb)	17170860	17171842	983	1	23164	ENST00000578548.1	211	ENSG00000133030	MPRIP	myosin phosphatase Rho interacting protein
chr17_28725691_28726203	513	Promoter (<=1kb)	28725897	28735367	9471	1	284086	ENST00000579671.5	0	ENSG00000160602	NEK8	NIMA related kinase 8
chr17_34782361_34782696	336	Distal Intergenic	34635793	34637506	1714	1	124842	ENST00000577271.1	146568	ENSG00000181291	TMEM132E	transmembrane protein 132E
chr17_39252989_39253422	434	3' UTR	39243963	39250818	6856	1	101929578	ENST00000580264.1	9026		LOC101929578	transcription factor CP2-like
chr17_41544573_41544937	365	Distal Intergenic	41549606	41554495	4890	2	147093	ENST00000456403.1	9558	ENSG00000226629	LINC00974	long intergenic non-protein coding RNA 974
chr17_52709802_52710390	589	Distal Intergenic	52862121	52899588	37468	1	105371831	ENST00000412360.1	-151731	ENSG00000226364	LINC02089	long intergenic non-protein coding RNA 2089
chr17_54612650_54613091	442	Intron (ENST00000654899.1/ENST00000654899.1, intron 1 of 1)	54899387	54937316	37930	1	10040	ENST00000570371.5	-286296	ENSG00000141198	TOM1L1	target of myb1 like 1 membrane trafficking protein
chr17_56510605_56510885	281	Exon (ENST00000635860.2/162282, exon 23 of 23)	56456947	56463906	6960	1	162282	ENST00000572321.1	53658	ENSG00000153930	ANKFN1	ankyrin repeat and fibronectin type III domain containing 1
chr17_57156202_57156661	460	Distal Intergenic	57116133	57121342	5210	1	8165	ENST00000572560.1	40069	ENSG00000121057	AKAP1	A-kinase anchoring protein 1
chr17_58242406_58242640	235	Exon (ENST00000655053.1/ENST00000655053.1, exon 2 of 2)	58238715	58249668	10954	1	4025	ENST00000581008.1	3691	ENSG00000167419	LPO	lactoperoxidase
chr17_61283628_61284005	378	Intron (ENST00000407086.8/54828, intron 22 of 23)	61245260	61392273	147014	1	54828	ENST00000588569.1	38368	ENSG00000141376	BCAS3	BCAS3 microtubule associated cell migration factor
chr17_63304951_63305212	262	Intron (ENST00000689528.1/26115, intron 9 of 27)	63193931	63339053	145123	2	105371857	ENST00000581421.1	33841
chr17_73549467_73549725	259	Intron (ENST00000392650.8/54549, intron 1 of 44)	73513612	73521407	7796	1	101928251	ENST00000583712.2	35855	ENSG00000264985	LOC101928251	uncharacterized LOC101928251
chr17_76788573_76788828	256	Distal Intergenic	76799044	76807102	8059	1	101928514	ENST00000585863.2	-10216	ENSG00000267065	LINC02080	long intergenic non-protein coding RNA 2080
chr17_82252371_82252587	217	Promoter (<=1kb)	82249239	82252527	3289	2	1453	ENST00000581108.5	0	ENSG00000141551	CSNK1D	casein kinase 1 delta
chr17_82722268_82722637	370	Promoter (<=1kb)	82722609	82727097	4489	1	79672	ENST00000576363.1	0	ENSG00000141560	FN3KRP	fructosamine 3 kinase related protein
chr18_10195039_10195285	247	Distal Intergenic	10085838	10144406	58569	1	105371984	ENST00000685786.1	109201		LOC105371984	uncharacterized LOC105371984
chr18_13165232_13165586	355	Distal Intergenic	13116404	13125030	8627	1	55125	ENST00000513183.1	48828	ENSG00000101639	CEP192	centrosomal protein 192
chr18_13289846_13290169	324	Intron (ENST00000590371.5/753, intron 2 of 2)	13278105	13621271	343167	1	753	ENST00000678459.1	11741	ENSG00000168675	LDLRAD4	low density lipoprotein receptor class A domain containing 4
chr18_13393403_13393691	289	Intron (ENST00000679177.1/753, intron 3 of 5)	13387341	13438384	51044	1	753	ENST00000677867.1	6062	ENSG00000168675	LDLRAD4	low density lipoprotein receptor class A domain containing 4
chr18_25380066_25380424	359	Distal Intergenic	25227607	25352190	124584	2	25925	ENST00000579111.5	-27876	ENSG00000198795	ZNF521	zinc finger protein 521
chr18_33301128_33301381	254	Intron (ENST00000403303.5/374864, intron 10 of 21)	32937406	33266965	329560	2	374864	ENST00000581524.5	-34163	ENSG00000166960	CCDC178	coiled-coil domain containing 178
chr18_36495676_36495903	228	Intron (ENST00000590592.6/80206, intron 3 of 28)	36544551	36780055	235505	1	80206	ENST00000591635.5	-48648	ENSG00000134775	FHOD3	formin homology 2 domain containing 3
chr18_44771618_44771890	273	Intron (ENST00000426838.8/26040, intron 2 of 3)	44701338	44872146	170809	1	26040	ENST00000645568.1	70280	ENSG00000152217	SETBP1	SET binding protein 1
chr18_45094042_45094393	352	Distal Intergenic	45168549	45170467	1919	2	101927961	ENST00000671581.1	76074		LOC101927961	uncharacterized LOC101927961
chr18_50662963_50663270	308	Promoter (1-2kb)	50664299	50669842	5544	1	5596	ENST00000587823.1	-1029	ENSG00000141639	MAPK4	mitogen-activated protein kinase 4
chr18_53520103_53520322	220	Intron (ENST00000442544.7/1630, intron 27 of 28)	53499315	53526948	27634	1	1630	ENST00000579702.1	20788	ENSG00000187323	DCC	DCC netrin 1 receptor
chr18_58098040_58098538	499	Intron (ENST00000400345.8/23327, intron 1 of 30)	58091228	58165808	74581	1	23327	ENST00000675227.1	6812	ENSG00000049759	NEDD4L	NEDD4 like E3 ubiquitin protein ligase
chr18_61320717_61321001	285	Distal Intergenic	61333430	61555779	222350	1	28316	ENST00000262717.9	-12429	ENSG00000101542	CDH20	cadherin 20
chr18_62047271_62047569	299	Intron (ENST00000639600.1/23556, intron 23 of 24)	62072370	62075181	2812	2	23556	ENST00000640704.1	27612	ENSG00000197563	PIGN	phosphatidylinositol glycan anchor biosynthesis class N
chr18_65383820_65384078	259	Distal Intergenic	65423958	65448167	24210	1	107985128	ENST00000582028.2	-39880	ENSG00000264232	LINC01916	long intergenic non-protein coding RNA 1916
chr18_66679628_66679865	238	Distal Intergenic	66504812	66604138	99327	2	28513	ENST00000579658.5	-75490	ENSG00000071991	CDH19	cadherin 19
chr18_70902803_70903020	218	Distal Intergenic	71137829	71208366	70538	1	105372188	ENST00000658819.1	-234809	ENSG00000287693	LOC105372188	uncharacterized LOC105372188
chr18_73831640_73832234	595	Distal Intergenic	73683507	73691289	7783	2	105372190	ENST00000701111.1	-140351		LOC105372190	uncharacterized LOC105372190
chr18_76085244_76085677	434	Distal Intergenic	76122968	76131449	8482	1	339298	ENST00000653783.1	-37291	ENSG00000263547	LOC339298	uncharacterized LOC339298
chr18_77616461_77617063	603	Distal Intergenic	77421619	77561044	139426	1	107985172	ENST00000583629.2	194842		LOC107985172	uncharacterized LOC107985172
chr18_78069730_78070024	295	Distal Intergenic	77971334	77993731	22398	2	101927715	ENST00000661306.1	-75999	ENSG00000265843	LINC01029	long intergenic non-protein coding RNA 1029
chr18_78857348_78857814	467	Distal Intergenic	78908629	78918993	10365	2	105372224	ENST00000578030.1	61179		LOC105372224	uncharacterized LOC105372224
chr19_2674535_2674865	331	Intron (ENST00000382159.8/2788, intron 1 of 4)	2514993	2683691	168699	2	2788	ENST00000587867.1	8826	ENSG00000176533	GNG7	G protein subunit gamma 7
chr19_3538871_3539094	224	Promoter (<=1kb)	3539171	3544030	4860	1	100128569	ENST00000681976.1	-77	ENSG00000183397	TEKTIP1	tektin bundle interacting protein 1
chr19_3971210_3971572	363	Promoter (<=1kb)	3964322	3971123	6802	2	1613	ENST00000596311.5	-87	ENSG00000167657	DAPK3	death associated protein kinase 3
chr19_14569276_14569494	219	Promoter (2-3kb)	14566078	14572062	5985	2	4713	ENST00000593353.5	2568	ENSG00000099795	NDUFB7	NADH:ubiquinone oxidoreductase subunit B7
chr19_16272932_16273181	250	Distal Intergenic	16234044	16234764	721	1	8907	ENST00000592703.1	38888	ENSG00000072958	AP1M1	adaptor related protein complex 1 subunit mu 1
chr19_17437506_17437732	227	Intron (ENST00000341130.6/100130519, intron 2 of 2)	17444812	17448309	3498	2	100130519	ENST00000593461.1	10577	ENSG00000188051	TMEM221	transmembrane protein 221
chr19_27771069_27771319	251	Intron (ENST00000666409.1/148189, intron 1 of 6)	27681072	27793138	112067	2	148189	ENST00000666409.1	21819	ENSG00000261824	LINC00662	long intergenic non-protein coding RNA 662
chr19_30314110_30314575	466	Intron (ENST00000585628.5/9745, intron 2 of 5)	30372384	30558059	185676	1	9745	ENST00000355537.4	-57809	ENSG00000198597	ZNF536	zinc finger protein 536
chr19_30887156_30887414	259	Distal Intergenic	30907199	30909155	1957	1	107985280	ENST00000567374.1	-19785	ENSG00000261316	LINC01834	long intergenic non-protein coding RNA 1834
chr19_32497285_32497653	369	Distal Intergenic	32477483	32482293	4811	1	147991	ENST00000608291.1	19802	ENSG00000178904	DPY19L3	dpy-19 like C-mannosyltransferase 3
chr19_33424232_33424453	222	Intron (ENST00000244137.12/5184, intron 9 of 14)	33391389	33415842	24454	2	5184	ENST00000698434.1	-8390	ENSG00000124299	PEPD	peptidase D
chr19_35439386_35439661	276	Distal Intergenic	35432957	35434642	1686	2	101927522	ENST00000428426.2	-4744		LOC101927522	uncharacterized LOC101927522
chr19_35657840_35658073	234	Intron (ENST00000649813.2/1340, intron 3 of 3)	35651245	35658778	7534	1	1340	ENST00000590618.1	6595	ENSG00000126267	COX6B1	cytochrome c oxidase subunit 6B1
chr19_46007833_46008265	433	3' UTR	46003006	46018392	15387	1	729440	ENST00000594087.1	4827	ENSG00000104983	CCDC61	coiled-coil domain containing 61
chr19_48885141_48885401	261	Intron (ENST00000221399.8/7288, intron 9 of 12)	48880971	48882125	1155	2	7288	ENST00000522341.1	-3016	ENSG00000104804	TULP2	TUB like protein 2
chr19_48968846_48969738	893	3' UTR	48965309	48966879	1571	1	2512	ENST00000331825.11	3537	ENSG00000087086	FTL	ferritin light chain
chr2_387951_388166	216	Distal Intergenic	318053	342118	24066	1	105373350	ENST00000436808.2	69898		LINC01865	long intergenic non-protein coding RNA 1865
chr2_2512928_2513256	329	Distal Intergenic	2641989	2656630	14642	2	107985839	ENST00000414065.1	143374		LOC107985839	uncharacterized LOC107985839
chr2_3044902_3045326	425	Intron (ENST00000457478.1/101927554, intron 3 of 6)	2896500	3001450	104951	2	101927554	ENST00000667683.1	-43452	ENSG00000234423	LINC01250	long intergenic non-protein coding RNA 1250
chr2_3263318_3263605	288	Intron (ENST00000478754.5/7260, intron 3 of 10)	3194083	3257559	63477	2	7260	ENST00000482570.5	-5759	ENSG00000032389	EIPR1	EARP complex and GARP complex interacting protein 1
chr2_4248452_4248705	254	Distal Intergenic	4136644	4140731	4088	2	107985841	ENST00000442831.1	-107721		LOC107985841	uncharacterized LOC107985841
chr2_10279597_10279937	341	Distal Intergenic	10287711	10301217	13507	2	101929691	ENST00000702805.1	21280	ENSG00000285872	LOC101929691	uncharacterized LOC101929691
chr2_23071820_23072414	595	Intron (ENST00000421581.1/107985792, intron 1 of 6)	23018125	23090837	72713	2	107985792	ENST00000421581.1	18423		LOC107985792	uncharacterized LOC107985792
chr2_30172096_30172427	332	Distal Intergenic	30187434	30187566	133	1	109616960	ENST00000384458.1	-15007	ENSG00000207187	SNORA10B	small nucleolar RNA, H/ACA box 10B
chr2_30752875_30753435	561	Promoter (1-2kb)	30743144	30751226	8083	2	92291	ENST00000465450.2	-1649	ENSG00000162949	CAPN13	calpain 13
chr2_31708508_31708852	345	Distal Intergenic	31793823	31803980	10158	2	105374449	ENST00000416279.1	95128	ENSG00000223647	LINC01946	long intergenic non-protein coding RNA 1946
chr2_33379298_33379579	282	Intron (ENST00000404816.7/4052, intron 31 of 33)	33418516	33418564	49	1	100616136	ENST00000636982.1	-38937	ENSG00000283591	MIR4430	microRNA 4430
chr2_55120084_55120377	294	Distal Intergenic	55027207	55112621	85415	2	57142	ENST00000427710.5	-7463	ENSG00000115310	RTN4	reticulon 4
chr2_84813322_84813549	228	Intron (ENST00000389394.8/1768, intron 74 of 76)	84821666	84835504	13839	2	129293	ENST00000479944.5	21955	ENSG00000186854	TRABD2A	TraB domain containing 2A
chr2_90064647_90065080	434	Distal Intergenic	89622213	89640635	18423	2	101927050	ENST00000636037.1	-424012		KMT2CP4	lysine methyltransferase 2C pseudogene 4
chr2_90074387_90074611	225	Distal Intergenic	89622213	89640635	18423	2	101927050	ENST00000636037.1	-433752		KMT2CP4	lysine methyltransferase 2C pseudogene 4
chr2_95373747_95374061	315	Intron (ENST00000295225.10/30818, intron 2 of 8)	95346728	95384049	37322	1	30818	ENST00000468529.1	27019	ENSG00000115041	KCNIP3	potassium voltage-gated channel interacting protein 3
chr2_96135662_96135905	244	Promoter (1-2kb)	96133684	96137777	4094	2	431705	ENST00000470582.1	1872	ENSG00000188886	ASTL	astacin like metalloendopeptidase
chr2_98748616_98748973	358	Distal Intergenic	98619106	98731132	112027	2	11320	ENST00000393487.6	-17484	ENSG00000071073	MGAT4A	alpha-1,3-mannosyl-glycoprotein 4-beta-N-acetylglucosaminyltransferase A
chr2_101202894_101203169	276	Intron (ENST00000463469.5/11138, intron 1 of 4)	101090253	101252866	162614	2	11138	ENST00000463469.5	49697	ENSG00000204634	TBC1D8	TBC1 domain family member 8
chr2_108289853_108290108	256	Promoter (<=1kb)	108288915	108308713	19799	1	6819	ENST00000437390.6	938	ENSG00000198203	SULT1C2	sulfotransferase family 1C member 2
chr2_110869687_110870045	359	Intron (ENST00000676595.1/55289, intron 10 of 18)	110805319	110995909	190591	1	55289	ENST00000433706.5	64368	ENSG00000153093	ACOXL	acyl-CoA oxidase like
chr2_120643785_120644195	411	Distal Intergenic	120552781	120558119	5339	2	105373585	ENST00000432474.2	-85666		LOC105373585	uncharacterized LOC105373585
chr2_121236512_121236909	398	Promoter (2-3kb)	121224164	121234274	10111	2	29842	ENST00000464621.1	-2238	ENSG00000115112	TFCP2L1	transcription factor CP2 like 1
chr2_122205781_122206151	371	Intron (ENST00000657880.1/105373595, intron 2 of 8)	122503366	122505118	1753	2	105373593	ENST00000654765.1	298967		LOC105373593	uncharacterized LOC105373593
chr2_124960909_124961251	343	Distal Intergenic	124221705	124242441	20737	1	129684	ENST00000470921.1	739204	ENSG00000155052	CNTNAP5	contactin associated protein family member 5
chr2_127642754_127643085	332	Promoter (<=1kb)	127638426	127643228	4803	2	55679	ENST00000409286.5	143	ENSG00000072163	LIMS2	LIM zinc finger domain containing 2
chr2_129363162_129363553	392	Distal Intergenic	129242173	129273848	31676	2	151121	ENST00000375987.3	-89314	ENSG00000204460	LINC01854	long intergenic non-protein coding RNA 1854
chr2_129634861_129635199	339	Distal Intergenic	129825126	129877404	52279	2	105373615	ENST00000641154.1	242205	ENSG00000229536	LINC02572	long intergenic non-protein coding RNA 2572
chr2_132725710_132725924	215	Exon (ENST00000409261.6/344148, exon 19 of 20)	132671799	132732051	60253	2	344148	ENST00000640590.1	6127	ENSG00000176771	NCKAP5	NCK associated protein 5
chr2_134075366_134075648	283	Distal Intergenic	134119983	134254606	134624	1	4249	ENST00000481801.5	-44335	ENSG00000152127	MGAT5	alpha-1,6-mannosylglycoprotein 6-beta-N-acetylglucosaminyltransferase
chr2_153221601_153221863	263	Distal Intergenic	153337705	153357422	19718	1	107985951	ENST00000429916.1	-115842		LINC01850	long intergenic non-protein coding RNA 1850
chr2_153328788_153329128	341	Distal Intergenic	153337705	153357422	19718	1	107985951	ENST00000429916.1	-8577		LINC01850	long intergenic non-protein coding RNA 1850
chr2_163017416_163018020	605	Distal Intergenic	162371407	162838767	467361	2	90134	ENST00000332142.10	-178649	ENSG00000184611	KCNH7	potassium voltage-gated channel subfamily H member 7
chr2_163241389_163241616	228	Distal Intergenic	162371407	162838767	467361	2	90134	ENST00000332142.10	-402622	ENSG00000184611	KCNH7	potassium voltage-gated channel subfamily H member 7
chr2_174711904_174712262	359	Intron (ENST00000442996.1/ENST00000442996.1, intron 2 of 3)	174719908	174720318	411	1	440926	ENST00000369387.4	-7646		H3P6	H3 histone pseudogene 6
chr2_175343406_175343625	220	Intron (ENST00000444567.1/ENST00000444567.1, intron 2 of 2)	175257362	175463180	205819	1	105373752	ENST00000653625.1	86044		LOC105373752	uncharacterized LOC105373752
chr2_177629027_177629380	354	3' UTR	177612999	177618742	5744	2	92104	ENST00000355689.6	-10285	ENSG00000197557	TTC30A	tetratricopeptide repeat domain 30A
chr2_184116297_184116531	235	Intron (ENST00000652637.1/105373775, intron 2 of 5)	184049467	184187573	138107	2	105373775	ENST00000652637.1	71042
chr2_186223974_186224202	229	Intron (ENST00000655126.1/101927217, intron 2 of 8)	186033249	186215093	181845	2	101927217	ENST00000666677.1	-8881		LINC01473	long intergenic non-protein coding RNA 1473
chr2_187934492_187934769	278	Intron (ENST00000434418.2/104355152, intron 3 of 3)	188227820	188287634	59815	2	104355152	ENST00000415357.1	352865	ENSG00000231689	LINC01090	long intergenic non-protein coding RNA 1090
chr2_209830632_209830872	241	Promoter (1-2kb)	209829229	209970314	141086	1	285175	ENST00000489023.5	1403	ENSG00000144406	UNC80	unc-80 homolog, NALCN channel complex subunit
chr2_214461608_214461882	275	Intron (ENST00000312504.10/402117, intron 3 of 3)	214510196	214536890	26695	1	100885780	ENST00000416430.1	-48314	ENSG00000224257	VWC2L-IT1	VWC2L intronic transcript 1
chr2_218823004_218823245	242	Promoter (<=1kb)	218823090	218823154	65	1	103504730	ENST00000635985.1	0	ENSG00000283639	MIR9500	microRNA 9500
chr2_219921118_219921384	267	Distal Intergenic	219906502	219906565	64	2	100422959	ENST00000581624.1	-14553	ENSG00000266518	MIR4268	microRNA 4268
chr2_221724460_221724695	236	Distal Intergenic	221637543	221641813	4271	1	105373899	ENST00000453706.2	86917		LOC105373899	uncharacterized LOC105373899
chr2_231047058_231047524	467	3' UTR	231041107	231049719	8613	1	257407	ENST00000463834.1	5951	ENSG00000204128	C2orf72	chromosome 2 open reading frame 72
chr2_232687825_232688229	405	Distal Intergenic	232697299	232736214	38916	1	26058	ENST00000476995.5	-9070	ENSG00000204120	GIGYF2	GRB10 interacting GYF protein 2
chr2_235891576_235892023	448	Intron (ENST00000304032.13/116987, intron 10 of 17)	235773855	235783387	9533	2	105373942	ENST00000440101.1	-108189		LOC105373942	uncharacterized LOC105373942
chr2_237577990_237578437	448	Promoter (1-2kb)	237574326	237579570	5245	2	64284	ENST00000477149.5	1133	ENSG00000124839	RAB17	RAB17, member RAS oncogene family
chr20_16294571_16294954	384	Intron (ENST00000636835.1/55614, intron 24 of 24)	16366843	16370636	3794	2	55614	ENST00000635823.1	75682	ENSG00000089177	KIF16B	kinesin family member 16B
chr20_17509476_17509821	346	Intron (ENST00000377873.8/631, intron 4 of 7)	17506828	17514741	7914	2	631	ENST00000492424.1	4920	ENSG00000125864	BFSP1	beaded filament structural protein 1
chr20_20208656_20209224	569	Intron (ENST00000245957.10/26074, intron 17 of 26)	20220123	20265810	45688	1	26074	ENST00000468719.6	-10899	ENSG00000089101	CFAP61	cilia and flagella associated protein 61
chr20_21226811_21227029	219	Promoter (<=1kb)	21226140	21232914	6775	1	55857	ENST00000441136.1	671	ENSG00000088970	KIZ	kizuna centrosomal protein
chr20_33106734_33106969	236	Promoter (2-3kb)	33104704	33111751	7048	1	149954	ENST00000494121.1	2030	ENSG00000186191	BPIFB4	BPI fold containing family B member 4
chr20_36984198_36984437	240	Distal Intergenic	36890445	36951893	61449	2	25939	ENST00000683766.1	-32305	ENSG00000101347	SAMHD1	SAM and HD domain containing deoxynucleoside triphosphate triphosphohydrolase 1
chr20_41726827_41727086	260	Distal Intergenic	41514920	41618384	103465	2	84181	ENST00000482596.1	-108443	ENSG00000124177	CHD6	chromodomain helicase DNA binding protein 6
chr20_42845910_42846488	579	Intron (ENST00000356100.6/11122, intron 2 of 30)	42677866	42791467	113602	2	11122	ENST00000620410.1	-54443	ENSG00000196090	PTPRT	protein tyrosine phosphatase receptor type T
chr20_48044512_48045099	588	Intron (ENST00000701169.1/105372639, intron 1 of 3)	48025245	48060271	35027	1	105372639	ENST00000653312.1	19267		LOC105372639	uncharacterized LOC105372639
chr20_48548880_48549418	539	Distal Intergenic	48471308	48472414	1107	1	105372645	ENST00000630976.1	77572		LOC105372645	uncharacterized LOC105372645
chr20_48706843_48707160	318	Intron (ENST00000371941.4/57580, intron 6 of 39)	48624252	48657127	32876	2	57580	ENST00000482556.5	-49716	ENSG00000124126	PREX1	phosphatidylinositol-3,4,5-trisphosphate dependent Rac exchange factor 1
chr20_51397401_51397720	320	Promoter (1-2kb)	51391409	51399219	7811	2	4773	ENST00000496054.1	1499	ENSG00000101096	NFATC2	nuclear factor of activated T cells 2
chr20_53308881_53309100	220	Intron (ENST00000371497.10/128553, intron 2 of 2)	53255979	53491063	235085	1	128553	ENST00000605656.2	52902	ENSG00000182463	TSHZ2	teashirt zinc finger homeobox 2
chr20_55987002_55987274	273	Distal Intergenic	55997357	56005519	8163	2	140689	ENST00000064571.3	18245	ENSG00000054803	CBLN4	cerebellin 4 precursor
chr20_56489428_56489803	376	Intron (ENST00000023939.8/51507, intron 6 of 9)	56468686	56477032	8347	1	51507	ENST00000466260.1	20742	ENSG00000022277	RTF2	replication termination factor 2
chr20_62468527_62468851	325	Intron (ENST00000252997.3/140628, intron 3 of 6)	62463497	62475995	12499	2	140628	ENST00000252997.3	7144	ENSG00000130700	GATA5	GATA binding protein 5
chr21_10582814_10583095	282	Intron (ENST00000612267.1/7179, intron 26 of 31)	10521583	10605716	84134	1	7179	ENST00000618007.5	61231	ENSG00000274391	TPTE	transmembrane phosphatase with tensin homology
chr21_19413105_19413420	316	Distal Intergenic	19130523	19134423	3901	1	107985490	ENST00000424219.1	282582		LOC107985490	uncharacterized LOC107985490
chr21_44834870_44835316	447	Distal Intergenic	44805617	44818779	13163	2	6612	ENST00000479153.1	-16091	ENSG00000184900	SUMO3	small ubiquitin like modifier 3
chr22_16953800_16954130	331	Exon (ENST00000643267.1/ENST00000643267.1, exon 1 of 3)	16966100	16968383	2284	2	128954	ENST00000520505.5	14253	ENSG00000215568	GAB4	GRB2 associated binding protein family member 4
chr22_26789484_26789779	296	Distal Intergenic	26779187	26780893	1707	1	102724827	ENST00000669899.1	10297		MIATNB	MIAT neighbor
chr22_27466372_27466601	230	Distal Intergenic	27436292	27441774	5483	1	105372980	ENST00000654206.1	30080	ENSG00000287034	LOC105372980	uncharacterized LOC105372980
chr22_36244167_36244390	224	Distal Intergenic	36226210	36239954	13745	2	23780	ENST00000249066.10	-4213	ENSG00000128335	APOL2	apolipoprotein L2
chr22_36556833_36557392	560	Distal Intergenic	36523115	36529184	6070	2	8664	ENST00000432675.4	-27649	ENSG00000100353	EIF3D	eukaryotic translation initiation factor 3 subunit D
chr22_37735194_37735517	324	3' UTR	37746233	37774140	27908	1	11078	ENST00000403663.6	-10716	ENSG00000100106	TRIOBP	TRIO and F-actin binding protein
chr22_37986463_37986783	321	Promoter (<=1kb)	37986199	38026637	40439	1	5435	ENST00000427034.1	264	ENSG00000100142	POLR2F	RNA polymerase II, I and III subunit F
chr22_40301013_40301331	319	Promoter (<=1kb)	40300856	40301495	640	1	23112	ENST00000467658.1	157	ENSG00000100354	TNRC6B	trinucleotide repeat containing adaptor 6B
chr22_47564769_47565064	296	Distal Intergenic	47625230	47629902	4673	2	400932	ENST00000609786.5	64838	ENSG00000205634	LINC00898	long intergenic non-protein coding RNA 898
chr22_48143635_48144037	403	Distal Intergenic	48274364	48274415	52	1	100422916	ENST00000578320.1	-130327	ENSG00000266508	MIR3201	microRNA 3201
chr22_49641306_49641614	309	Intron (ENST00000414287.5/348645, intron 1 of 4)	49624167	49626894	2728	2	348645	ENST00000444628.2	-14412	ENSG00000188511	MIR3667HG	MIR3667 host gene
chr3_690592_690859	268	Intron (ENST00000661103.1/101927215, intron 2 of 3)	546192	845322	299131	1	101927215	ENST00000653731.1	144400	ENSG00000224957	LINC01266	long intergenic non-protein coding RNA 1266
chr3_1757325_1757567	243	Distal Intergenic	2098813	2745687	646875	1	152330	ENST00000422330.5	-341246	ENSG00000144619	CNTN4	contactin 4
chr3_8785057_8785299	243	Intron (ENST00000472766.1/859, intron 2 of 2)	8768058	8769628	1571	2	5021	ENST00000431493.1	-15429	ENSG00000180914	OXTR	oxytocin receptor
chr3_10472447_10472762	316	Intron (ENST00000397077.6/491, intron 1 of 19)	10328203	10449780	121578	2	491	ENST00000644807.1	-22667	ENSG00000157087	ATP2B2	ATPase plasma membrane Ca2+ transporting 2
chr3_29985431_29985753	323	Promoter (2-3kb)	29988073	29991715	3643	1	27303	ENST00000497274.1	-2320	ENSG00000144642	RBMS3	RNA binding motif single stranded interacting protein 3
chr3_32033889_32034162	274	Intron (ENST00000479173.1/114884, intron 2 of 3)	31876433	32077580	201148	2	114884	ENST00000479173.1	43418	ENSG00000144645	OSBPL10	oxysterol binding protein like 10
chr3_33900624_33900844	221	Distal Intergenic	33863896	33866468	2573	1	10015	ENST00000473593.1	36728	ENSG00000170248	PDCD6IP	programmed cell death 6 interacting protein
chr3_35452959_35453356	398	Distal Intergenic	35638945	35687789	48845	1	10777	ENST00000450234.5	-185589	ENSG00000172995	ARPP21	cAMP regulated phosphoprotein 21
chr3_37641539_37641932	394	Intron (ENST00000264741.10/3680, intron 16 of 27)	37683876	37732999	49124	1	3680	ENST00000461533.1	-41944	ENSG00000144668	ITGA9	integrin subunit alpha 9
chr3_42667425_42667767	343	3' UTR	42658814	42665854	7041	1	92999	ENST00000505904.1	8611	ENSG00000114853	ZBTB47	zinc finger and BTB domain containing 47
chr3_46206355_46206571	217	Promoter (1-2kb)	46201711	46208313	6603	2	1230	ENST00000296140.4	1742	ENSG00000163823	CCR1	C-C motif chemokine receptor 1
chr3_47572747_47573120	374	Exon (ENST00000264723.9/10675, exon 3 of 5)	47562239	47578133	15895	2	10675	ENST00000456150.5	5013	ENSG00000114646	CSPG5	chondroitin sulfate proteoglycan 5
chr3_50220664_50221069	406	Promoter (2-3kb)	50217917	50218680	764	1	10991	ENST00000417121.2	2747	ENSG00000188338	SLC38A3	solute carrier family 38 member 3
chr3_51792196_51792918	723	Distal Intergenic	51798803	51830545	31743	1	401067	ENST00000650142.1	-5885	ENSG00000229972	IQCF3	IQ motif containing F3
chr3_52573415_52573639	225	Intron (ENST00000476842.1/440957, intron 1 of 1)	52585473	52609461	23989	2	55193	ENST00000462207.1	35822	ENSG00000163939	PBRM1	polybromo 1
chr3_56173404_56173617	214	Promoter (<=1kb)	56148988	56173899	24912	2	26059	ENST00000484857.2	282	ENSG00000187672	ERC2	ELKS/RAB6-interacting/CAST family member 2
chr3_62094752_62095057	306	Intron (ENST00000474889.6/5793, intron 5 of 29)	62217583	62293551	75969	1	5793	ENST00000475012.5	-122526	ENSG00000144724	PTPRG	protein tyrosine phosphatase receptor type G
chr3_63132725_63132987	263	Distal Intergenic	63105975	63113895	7921	1	285401	ENST00000497573.1	26750	ENSG00000244342	LINC00698	long intergenic non-protein coding RNA 698
chr3_68847379_68847764	386	Intron (ENST00000295569.12/151647, intron 3 of 5)	68731766	68932547	200782	2	151647	ENST00000295569.12	84783	ENSG00000163377	TAFA4	TAFA chemokine like family member 4
chr3_72865906_72866132	227	Distal Intergenic	72832369	72861914	29546	2	55164	ENST00000482785.1	-3992	ENSG00000144736	SHQ1	SHQ1, H/ACA ribonucleoprotein assembly factor
chr3_76102942_76103156	215	Intron (ENST00000487694.7/6092, intron 2 of 26)	75906802	77647412	1740611	1	6092	ENST00000471893.2	196140	ENSG00000185008	ROBO2	roundabout guidance receptor 2
chr3_76293816_76294285	470	Intron (ENST00000487694.7/6092, intron 2 of 26)	76311096	77647053	1335958	1	6092	ENST00000475334.2	-16811	ENSG00000185008	ROBO2	roundabout guidance receptor 2
chr3_78441852_78442114	263	Distal Intergenic	78600113	78607289	7177	2	6091	ENST00000466906.1	165175	ENSG00000169855	ROBO1	roundabout guidance receptor 1
chr3_81358363_81358586	224	Distal Intergenic	81534667	81577943	43277	2	2632	ENST00000484687.1	219357	ENSG00000114480	GBE1	1,4-alpha-glucan branching enzyme 1
chr3_86093302_86093529	228	Distal Intergenic	86264555	86267361	2807	2	102723364	ENST00000479244.1	173832		LOC102723364	uncharacterized LOC102723364
chr3_103602876_103603114	239	Distal Intergenic	103524033	103524116	84	2	100616336	ENST00000584917.1	-78760	ENSG00000265328	MIR548AB	microRNA 548ab
chr3_104031124_104031581	458	Distal Intergenic	103524033	103524116	84	2	100616336	ENST00000584917.1	-507008	ENSG00000265328	MIR548AB	microRNA 548ab
chr3_104098562_104099007	446	Distal Intergenic	103524033	103524116	84	2	100616336	ENST00000584917.1	-574446	ENSG00000265328	MIR548AB	microRNA 548ab
chr3_121181499_121181748	250	Intron (ENST00000273666.10/9515, intron 9 of 27)	121049640	121049715	76	1	100847043	ENST00000584864.1	131859	ENSG00000264477	MIR5682	microRNA 5682
chr3_123747312_123747537	226	Intron (ENST00000360772.7/4638, intron 6 of 33)	123620286	123758389	138104	2	4638	ENST00000686822.1	10852	ENSG00000065534	MYLK	myosin light chain kinase
chr3_128436166_128436523	358	Distal Intergenic	128463594	128472317	8724	1	285224	ENST00000471626.1	-27071	ENSG00000242049	DNAJB8-AS1	DNAJB8 antisense RNA 1
chr3_134803130_134803432	303	Intron (ENST00000460895.5/2047, intron 2 of 3)	134796141	134951441	155301	1	2047	ENST00000497173.5	6989	ENSG00000154928	EPHB1	EPH receptor B1
chr3_143700701_143700967	267	Promoter (2-3kb)	143552419	143698149	145731	2	285195	ENST00000483124.1	-2552	ENSG00000181804	SLC9A9	solute carrier family 9 member A9
chr3_145684524_145685219	696	Exon (ENST00000491450.1/ENST00000491450.1, exon 1 of 1)	145939912	145961536	21625	1	107986138	ENST00000495382.1	-254693		LOC107986138	uncharacterized LOC107986138
chr3_152646941_152647261	321	Distal Intergenic	152650478	152679450	28973	1	102724289	ENST00000659139.2	-3217	ENSG00000287706	LOC102724289	uncharacterized LOC102724289
chr3_158872156_158872726	571	Distal Intergenic	158823194	158824476	1283	1	64747	ENST00000468409.1	48962	ENSG00000118855	MFSD1	major facilitator superfamily domain containing 1
chr3_163125784_163126148	365	Intron (ENST00000490357.1/ENST00000490357.1, intron 1 of 4)	163199578	163278573	78996	2	647107	ENST00000462928.5	152425	ENSG00000241369	LINC01192	long intergenic non-protein coding RNA 1192
chr3_163303544_163303781	238	Promoter (<=1kb)	163109697	163303362	193666	2	647107	ENST00000659266.1	-182	ENSG00000241369	LINC01192	long intergenic non-protein coding RNA 1192
chr3_163422882_163423098	217	Distal Intergenic	163199623	163361563	161941	2	647107	ENST00000489012.5	-61319	ENSG00000241369	LINC01192	long intergenic non-protein coding RNA 1192
chr3_176345374_176345664	291	Distal Intergenic	176515103	176515151	49	1	102465858	ENST00000636162.1	-169439	ENSG00000283333	MIR7977	microRNA 7977
chr3_185646983_185647392	410	Promoter (2-3kb)	185646880	185649523	2644	2	10644	ENST00000464166.1	2131	ENSG00000073792	IGF2BP2	insulin like growth factor 2 mRNA binding protein 2
chr3_190416369_190416958	590	Distal Intergenic	190388163	190412138	23976	1	10686	ENST00000264734.3	28206	ENSG00000113946	CLDN16	claudin 16
chr3_191697219_191697461	243	Distal Intergenic	191568535	191573509	4975	1	103344926	ENST00000438488.1	128684		PYDC2-AS1	PYDC2 antisense RNA 1
chr3_196317945_196318295	351	Promoter (<=1kb)	196248230	196318222	69993	2	255758	ENST00000431391.1	0	ENSG00000213123	DYNLT2B	dynein light chain Tctex-type 2B
chr4_877528_877830	303	Exon (ENST00000314167.9/2580, exon 16 of 28)	849278	872773	23496	2	2580	ENST00000509566.1	-4755	ENSG00000178950	GAK	cyclin G associated kinase
chr4_8598936_8599212	277	Promoter (2-3kb)	8601970	8619761	17792	1	8532	ENST00000513120.2	-2758	ENSG00000109625	CPZ	carboxypeptidase Z
chr4_10141325_10141603	279	Distal Intergenic	10075224	10116972	41749	2	9948	ENST00000699798.1	-24353	ENSG00000071127	WDR1	WD repeat domain 1
chr4_12301861_12302174	314	Distal Intergenic	12223466	12251286	27821	1	101929019	ENST00000667495.1	78395	ENSG00000251210	LINC02270	long intergenic non-protein coding RNA 2270
chr4_16121111_16121324	214	Distal Intergenic	16114233	16117479	3247	2	107986261	ENST00000666747.1	-3632		LOC107986261	uncharacterized LOC107986261
chr4_25003800_25004291	492	Exon (ENST00000382114.9/55203, exon 8 of 8)	24826940	24980204	153265	2	91050	ENST00000324309.8	-23596	ENSG00000181982	CCDC149	coiled-coil domain containing 149
chr4_25111188_25111684	497	Distal Intergenic	25120083	25126260	6178	2	51091	ENST00000681374.1	14576	ENSG00000109618	SEPSECS	Sep (O-phosphoserine) tRNA:Sec (selenocysteine) tRNA synthase
chr4_29295670_29295962	293	Distal Intergenic	29214398	29221162	6765	1	105374561	ENST00000512268.1	81272	ENSG00000248338	LINC02472	long intergenic non-protein coding RNA 2472
chr4_34009407_34009623	217	Intron (ENST00000664054.1/101928622, intron 1 of 3)	33776347	34039882	263536	2	101928622	ENST00000512581.5	30259	ENSG00000250954	LOC101928622	uncharacterized LOC101928622
chr4_34388981_34389326	346	Distal Intergenic	34120842	34335351	214510	2	105374394	ENST00000658479.1	-53630		LINC02484	long intergenic non-protein coding RNA 2484
chr4_35710000_35710571	572	Distal Intergenic	36005365	36046034	40670	2	116984	ENST00000513032.2	335463	ENSG00000047365	ARAP2	ArfGAP with RhoGAP domain, ankyrin repeat and PH domain 2
chr4_36574313_36574563	251	Intron (ENST00000662117.1/105374400, intron 3 of 4)	36496128	36641898	145771	2	105374400	ENST00000662117.1	67335		LINC02505	long intergenic non-protein coding RNA 2505
chr4_37150211_37150623	413	Distal Intergenic	37099472	37111035	11564	1	101928721	ENST00000654824.1	50739	ENSG00000247810	LOC101928721	uncharacterized LOC101928721
chr4_41982096_41982731	636	Promoter (<=1kb)	41981756	41986465	4710	1	285429	ENST00000333141.7	340	ENSG00000182308	DCAF4L1	DDB1 and CUL4 associated factor 4 like 1
chr4_44415611_44415845	235	Intron (ENST00000360029.4/386617, intron 1 of 1)	44174955	44447613	272659	2	386617	ENST00000515268.1	31768	ENSG00000183783	KCTD8	potassium channel tetramerization domain containing 8
chr4_52504564_52504860	297	Intron (ENST00000660768.1/112268466, intron 2 of 2)	52252820	52551574	298755	2	112268466	ENST00000660768.1	46714
chr4_59018300_59018600	301	Intron (ENST00000671471.1/105377247, intron 1 of 4)	59013573	59046959	33387	1	105377247	ENST00000509782.1	4727	ENSG00000251266	LINC02429	long intergenic non-protein coding RNA 2429
chr4_70531563_70531887	325	Intron (ENST00000339336.9/401138, intron 8 of 8)	70518585	70532514	13930	1	401138	ENST00000504451.1	12978	ENSG00000187689	AMTN	amelotin
chr4_72212875_72213143	269	Distal Intergenic	72146530	72148058	1529	1	10886	ENST00000506359.1	66345	ENSG00000056291	NPFFR2	neuropeptide FF receptor 2
chr4_81714739_81715237	499	Intron (ENST00000638048.1/153020, intron 3 of 16)	81458983	81471928	12946	2	153020	ENST00000507538.1	-242811	ENSG00000138670	RASGEF1B	RasGEF domain family member 1B
chr4_87277074_87277585	512	Distal Intergenic	87300495	87300583	89	2	100847027	ENST00000579870.1	22998	ENSG00000263981	MIR5705	microRNA 5705
chr4_97435033_97435425	393	Intron (ENST00000651895.1/101410545, intron 1 of 4)	97366926	97490164	123239	1	101410545	ENST00000508933.1	68107	ENSG00000251620	STPG2-AS1	STPG2 antisense RNA 1
chr4_97452407_97452758	352	Intron (ENST00000651895.1/101410545, intron 3 of 4)	97366926	97490164	123239	1	101410545	ENST00000508933.1	85481	ENSG00000251620	STPG2-AS1	STPG2 antisense RNA 1
chr4_109394179_109394400	222	Intron (ENST00000499713.6/ENST00000499713.6, intron 5 of 7)	109431443	109432777	1335	2	100533182	ENST00000667746.1	38377	ENSG00000247950	SEC24B-AS1	SEC24B antisense RNA 1
chr4_122102886_122103213	328	Distal Intergenic	122152331	122362752	210422	1	84162	ENST00000679879.1	-49118	ENSG00000138688	BLTP1	bridge-like lipid transfer protein family member 1
chr4_129133300_129133771	472	Exon (ENST00000508655.2/ENST00000508655.2, exon 1 of 1)	129096170	129106599	10430	1	132321	ENST00000508622.1	37130	ENSG00000151470	C4orf33	chromosome 4 open reading frame 33
chr4_136009233_136009579	347	Distal Intergenic	135866990	135913680	46691	2	100507528	ENST00000508714.5	-95553	ENSG00000248330	LINC00613	long intergenic non-protein coding RNA 613
chr4_136519728_136520041	314	Distal Intergenic	136809069	136921382	112314	2	105377441	ENST00000512039.1	401341	ENSG00000248869	LINC02511	long intergenic non-protein coding RNA 2511
chr4_141942770_141943431	662	Distal Intergenic	141721782	141727984	6203	1	3600	ENST00000509249.1	220988	ENSG00000164136	IL15	interleukin 15
chr4_143704692_143705083	392	Intron (ENST00000641328.1/105377459, intron 2 of 6)	143700734	143982274	281541	1	101927636	ENST00000641556.1	3958	ENSG00000251600	LOC101927636	uncharacterized LOC101927636
chr4_157389028_157389304	277	Distal Intergenic	157360700	157362934	2235	1	2891	ENST00000503980.1	28328	ENSG00000120251	GRIA2	glutamate ionotropic receptor AMPA type subunit 2
chr4_160543864_160544209	346	Intron (ENST00000512652.1/105377512, intron 2 of 4)	160539254	160586817	47564	1	105377512	ENST00000512652.1	4610		LINC02477	long intergenic non-protein coding RNA 2477
chr4_162814174_162814387	214	Intron (ENST00000661387.1/ENST00000661387.1, intron 2 of 3)	163093574	163093628	55	2	100616234	ENST00000638111.1	279241	ENSG00000283468	MIR4454	microRNA 4454
chr4_163004985_163005271	287	Distal Intergenic	163093574	163093628	55	2	100616234	ENST00000638111.1	88357	ENSG00000283468	MIR4454	microRNA 4454
chr4_163011097_163011497	401	Distal Intergenic	163093574	163093628	55	2	100616234	ENST00000638111.1	82131	ENSG00000283468	MIR4454	microRNA 4454
chr4_166980326_166980576	251	Intron (ENST00000541354.5/50859, intron 3 of 9)	166734147	167102557	368411	2	50859	ENST00000535728.5	121981	ENSG00000196104	SPOCK3	SPARC (osteonectin), cwcv and kazal like domains proteoglycan 3
chr4_173556931_173557395	465	Promoter (1-2kb)	173559154	173583128	23975	1	79804	ENST00000644952.1	-1759	ENSG00000237125	HAND2-AS1	HAND2 antisense RNA 1
chr4_177081425_177081736	312	Intron (ENST00000656694.1/105377557, intron 3 of 4)	176875749	176908031	32283	1	105377556	ENST00000670563.1	205676	ENSG00000250263	LINC02509	long intergenic non-protein coding RNA 2509
chr4_177899674_177900062	389	Intron (ENST00000666825.1/285501, intron 2 of 2)	177729638	177907862	178225	2	105377560	ENST00000507011.1	7800		LOC105377560	uncharacterized LOC105377560
chr4_181580310_181580537	228	Distal Intergenic	181820019	181829973	9955	2	105377573	ENST00000510211.1	249436	ENSG00000251336	TEMN3-AS1	TENM3 antisense transcript 1
chr4_185599893_185600172	280	Exon (ENST00000698536.1/8470, exon 6 of 9)	185587426	185589835	2410	2	8470	ENST00000478461.1	-10058	ENSG00000154556	SORBS2	sorbin and SH3 domain containing 2
chr4_188041816_188042106	291	Distal Intergenic	187995771	188005046	9276	1	132625	ENST00000326866.5	46045	ENSG00000179059	ZFP42	ZFP42 zinc finger protein
chr5_819373_819640	268	3' UTR	795606	842495	46890	2	79844	ENST00000503758.6	22855	ENSG00000188818	ZDHHC11	zinc finger DHHC-type containing 11
chr5_1759564_1759923	360	Distal Intergenic	1798829	1799750	922	2	64979	ENST00000510999.1	39827	ENSG00000171421	MRPL36	mitochondrial ribosomal protein L36
chr5_2131861_2132105	245	Distal Intergenic	2103097	2119926	16830	1	105374618	ENST00000663791.1	28764		LOC105374618	uncharacterized LOC105374618
chr5_5052169_5052430	262	Intron (ENST00000659550.1/340094, intron 1 of 1)	5057731	5067329	9599	1	340094	ENST00000514474.1	-5301	ENSG00000215231	LINC01020	long intergenic non-protein coding RNA 1020
chr5_5358542_5358816	275	Distal Intergenic	5420664	5454615	33952	1	23379	ENST00000512608.5	-61848	ENSG00000164151	ICE1	interactor of little elongation complex ELL subunit 1
chr5_11433501_11433745	245	Intron (ENST00000304623.13/1501, intron 3 of 21)	11384982	11386011	1030	2	1501	ENST00000514132.1	-47490	ENSG00000169862	CTNND2	catenin delta 2
chr5_13218384_13218707	324	Distal Intergenic	13144000	13190677	46678	1	105374659	ENST00000513283.2	74384		LOC105374659	uncharacterized LOC105374659
chr5_28886752_28887087	336	Intron (ENST00000658190.1/101929660, intron 1 of 1)	28926816	28927023	208	1	729862	ENST00000449530.2	-39729		LSP1P3	LSP1 pseudogene 3
chr5_31388684_31389019	336	Distal Intergenic	31401147	31406956	5810	2	29102	ENST00000514927.6	17937	ENSG00000113360	DROSHA	drosha ribonuclease III
chr5_39066083_39066356	274	Intron (ENST00000357387.8/253260, intron 2 of 37)	38940015	39074389	134375	2	253260	ENST00000511516.5	8033	ENSG00000164327	RICTOR	RPTOR independent companion of MTOR complex 2
chr5_41882867_41883266	400	Distal Intergenic	41730065	41870425	140361	2	5019	ENST00000196371.10	-12442	ENSG00000083720	OXCT1	3-oxoacid CoA-transferase 1
chr5_50292753_50293170	418	Distal Intergenic	50398027	50411998	13972	2	133418	ENST00000505896.5	118828	ENSG00000170571	EMB	embigin
chr5_61621314_61621547	234	Intron (ENST00000671203.1/ENST00000671203.1, intron 2 of 7)	61613885	61733368	119484	1	285668	ENST00000669536.1	7429	ENSG00000178722	C5orf64	chromosome 5 putative open reading frame 64
chr5_63668026_63668243	218	Distal Intergenic	63957874	63962445	4572	2	3350	ENST00000323865.5	294202	ENSG00000178394	HTR1A	5-hydroxytryptamine receptor 1A
chr5_68818073_68818387	315	Intron (ENST00000692586.1/107984116, intron 5 of 5)	68942928	68994832	51905	2	107984116	ENST00000654078.1	176445		LOC107984116	uncharacterized LOC107984116
chr5_76069396_76069622	227	Distal Intergenic	76083383	76333956	250574	1	22987	ENST00000502798.7	-13761	ENSG00000122012	SV2C	synaptic vesicle glycoprotein 2C
chr5_87488120_87488638	519	Intron (ENST00000644559.1/105379066, intron 3 of 4)	87394274	87412930	18657	2	902	ENST00000256897.9	-75190	ENSG00000134480	CCNH	cyclin H
chr5_94429747_94430104	358	Intron (ENST00000682413.1/285600, intron 14 of 20)	94412974	94477184	64211	2	285600	ENST00000504117.1	47080	ENSG00000185261	KIAA0825	KIAA0825
chr5_101806409_101806634	226	Distal Intergenic	102233986	102296284	62299	2	353189	ENST00000310954.7	489650	ENSG00000173930	SLCO4C1	solute carrier organic anion transporter family member 4C1
chr5_102179029_102179433	405	Distal Intergenic	102233986	102296284	62299	2	353189	ENST00000310954.7	116851	ENSG00000173930	SLCO4C1	solute carrier organic anion transporter family member 4C1
chr5_108748459_108748685	227	Promoter (<=1kb)	108748399	108832820	84422	1	2241	ENST00000513676.5	60	ENSG00000151422	FER	FER tyrosine kinase
chr5_114609442_114609847	406	Intron (ENST00000514115.6/101927078, intron 3 of 6)	114576041	114579970	3930	1	101927059	ENST00000506392.1	33401	ENSG00000251542	LINC01957	long intergenic non-protein coding RNA 1957
chr5_117013633_117014040	408	Distal Intergenic	116742991	116762209	19219	2	102467223	ENST00000504419.1	-251424		LINC02214	long intergenic non-protein coding RNA 2214
chr5_128765747_128766007	261	Intron (ENST00000508645.5/28965, intron 1 of 6)	128663978	128742829	78852	1	105379168	ENST00000514867.1	101769		LOC105379168	uncharacterized LOC105379168
chr5_133140580_133140836	257	Distal Intergenic	133160438	133224303	63866	1	105379181	ENST00000509051.1	-19602		CTB-49A3.2	uncharacterized CTB-49A3.2
chr5_133713309_133713553	245	Distal Intergenic	133196455	133612541	416087	2	23105	ENST00000265342.12	-100768	ENSG00000053108	FSTL4	follistatin like 4
chr5_139700756_139701013	258	Intron (ENST00000515296.1/84249, intron 2 of 5)	139684645	139745010	60366	1	84249	ENST00000515296.1	16111	ENSG00000146005	PSD2	pleckstrin and Sec7 domain containing 2
chr5_139818185_139818478	294	Intron (ENST00000274710.4/84249, intron 5 of 14)	139821890	139836881	14992	1	84249	ENST00000651792.1	-3412	ENSG00000146005	PSD2	pleckstrin and Sec7 domain containing 2
chr5_143812592_143812999	408	Promoter (<=1kb)	143812161	143820716	8556	1	57824	ENST00000289448.4	431	ENSG00000158497	HMHB1	histocompatibility minor HB-1
chr5_145777916_145778503	588	Intron (ENST00000510594.1/153768, intron 1 of 2)	145471799	145765000	293202	2	153768	ENST00000510259.5	-12916	ENSG00000186314	PRELID2	PRELI domain containing 2
chr5_168688096_168688445	350	Intron (ENST00000404867.7/6586, intron 25 of 31)	168683966	168696311	12346	2	6586	ENST00000518092.1	7866	ENSG00000184347	SLIT3	slit guidance ligand 3
chr5_172571688_172572061	374	Distal Intergenic	172556722	172559202	2481	2	105377728	ENST00000517916.2	-12486	ENSG00000254299	LINC01944	long intergenic non-protein coding RNA 1944
chr5_173557121_173557370	250	Distal Intergenic	173578275	173581554	3280	1	285593	ENST00000663273.1	-20905	ENSG00000253955	LINC02995	long intergenic non-protein coding RNA 2995
chr5_175067412_175067627	216	Distal Intergenic	174919082	174995513	76432	2	441116	ENST00000377300.3	-71899	ENSG00000204754	LINC01951	long intergenic non-protein coding RNA 1951
chr5_178805739_178805991	253	Intron (ENST00000503486.6/729522, intron 3 of 10)	178767204	178797611	30408	2	729522	ENST00000521412.2	-8128	ENSG00000250420	AACSP1	acetoacetyl-CoA synthetase pseudogene 1
chr5_181188387_181189034	648	Promoter (2-3kb)	181191046	181191852	807	2	102577426	ENST00000513771.1	2818	ENSG00000248473	LINC01962	long intergenic non-protein coding RNA 1962
chr6_378513_378775	263	Distal Intergenic	391739	407978	16240	1	3662	ENST00000696871.1	-12964	ENSG00000137265	IRF4	interferon regulatory factor 4
chr6_379126_379339	214	Distal Intergenic	391739	407978	16240	1	3662	ENST00000696871.1	-12400	ENSG00000137265	IRF4	interferon regulatory factor 4
chr6_961453_961697	245	Intron (ENST00000655659.1/285768, intron 3 of 3)	997024	1003720	6697	2	285768	ENST00000669177.1	42023	ENSG00000286785	LINC01622	long intergenic non-protein coding RNA 1622
chr6_1020981_1021441	461	Intron (ENST00000655659.1/285768, intron 1 of 3)	997024	1003720	6697	2	285768	ENST00000669177.1	-17261	ENSG00000286785	LINC01622	long intergenic non-protein coding RNA 1622
chr6_13283408_13283855	448	Promoter (<=1kb)	13273391	13283441	10051	2	100130357	ENST00000399446.6	0	ENSG00000215022	LOC100130357	uncharacterized LOC100130357
chr6_21616308_21616595	288	Distal Intergenic	21528739	21595593	66855	2	107986579	ENST00000637901.1	-20715		LOC107986579	uncharacterized LOC107986579
chr6_36946491_36946725	235	Promoter (1-2kb)	36948263	36964820	16558	1	221476	ENST00000647861.1	-1538	ENSG00000164530	PI16	peptidase inhibitor 16
chr6_39575578_39575821	244	Intron (ENST00000458470.5/221458, intron 7 of 18)	39583175	39596260	13086	2	221458	ENST00000441975.2	20439	ENSG00000164627	KIF6	kinesin family member 6
chr6_41269777_41270183	407	Exon (ENST00000407513.1/ENST00000407513.1, exon 1 of 1)	41275986	41281234	5249	2	54210	ENST00000589695.1	11051	ENSG00000124731	TREM1	triggering receptor expressed on myeloid cells 1
chr6_43830492_43830957	466	Intron (ENST00000637813.1/105375070, intron 2 of 2)	43847098	43852303	5206	2	285857	ENST00000649831.1	21346	ENSG00000283215	LINC02537	long intergenic non-protein coding RNA 2537
chr6_48979219_48979448	230	Distal Intergenic	49430360	49463253	32894	2	4594	ENST00000274813.4	483805	ENSG00000146085	MMUT	methylmalonyl-CoA mutase
chr6_62802989_62803409	421	Distal Intergenic	63280021	63319943	39923	2	51557	ENST00000622415.1	516534	ENSG00000146166	LGSN	lengsin, lens protein with glutamine synthetase domain
chr6_74183061_74183279	219	Intron (ENST00000435946.1/101928516, intron 1 of 3)	74069451	74690727	621277	1	101928516	ENST00000435946.1	113610	ENSG00000223786	LOC101928516	uncharacterized LOC101928516
chr6_74684901_74685317	417	Intron (ENST00000435946.1/101928516, intron 3 of 3)	74594583	74645640	51058	2	105377858	ENST00000607807.1	-39261		LOC105377858	uncharacterized LOC105377858
chr6_78016140_78016413	274	Distal Intergenic	77690656	77924759	234104	1	101928601	ENST00000649759.1	325484	ENSG00000269964	MEI4	meiotic double-stranded break formation protein 4
chr6_87900340_87900571	232	Distal Intergenic	88047841	88066838	18998	1	81833	ENST00000237201.2	-147270	ENSG00000118434	SPACA1	sperm acrosome associated 1
chr6_88540631_88540882	252	Distal Intergenic	88303275	88442928	139654	2	105377885	ENST00000655924.1	-97703		LOC105377885	uncharacterized LOC105377885
chr6_88573786_88574098	313	Distal Intergenic	88303275	88442928	139654	2	105377885	ENST00000655924.1	-130858		LOC105377885	uncharacterized LOC105377885
chr6_88789131_88789352	222	Intron (ENST00000369485.9/8732, intron 12 of 15)	88612719	88963409	350691	2	8732	ENST00000369475.7	174057	ENSG00000111880	RNGTT	RNA guanylyltransferase and 5'-phosphatase
chr6_101339825_101340050	226	Intron (ENST00000683774.1/2898, intron 4 of 16)	101385570	102070069	684500	1	2898	ENST00000683215.1	-45520	ENSG00000164418	GRIK2	glutamate ionotropic receptor kainate type subunit 2
chr6_102958982_102959392	411	Distal Intergenic	102054133	102070007	15875	1	2898	ENST00000682328.1	904849	ENSG00000164418	GRIK2	glutamate ionotropic receptor kainate type subunit 2
chr6_115464009_115464536	528	Distal Intergenic	115633555	115643883	10329	2	105377962	ENST00000666770.1	179347	ENSG00000228777	LINC02534	long intergenic non-protein coding RNA 2534
chr6_133677293_133677545	253	Exon (ENST00000406512.1/ENST00000406512.1, exon 1 of 1)	133537174	133767608	230435	2	100507308	ENST00000606292.5	90063	ENSG00000227954	TARID	TCF21 antisense RNA inducing promoter demethylation
chr6_145472398_145472720	323	Intron (ENST00000638717.1/7957, intron 4 of 4)	145625996	145634682	8687	2	7957	ENST00000638597.1	161962	ENSG00000112425	EPM2A	EPM2A glucan phosphatase, laforin
chr6_148545735_148546270	536	Exon (ENST00000367467.8/23328, exon 19 of 20)	148527265	148532817	5553	1	23328	ENST00000635969.1	18470	ENSG00000111961	SASH1	SAM and SH3 domain containing 1
chr6_159338234_159338755	522	Distal Intergenic	159359992	159383321	23330	2	105378084	ENST00000666569.1	44566		LOC105378084	uncharacterized LOC105378084
chr6_160634847_160635078	232	Intron (ENST00000316300.10/4018, intron 7 of 38)	160617116	160640850	23735	2	4018	ENST00000614786.1	5772	ENSG00000198670	LPA	lipoprotein(a)
chr6_165484375_165484742	368	Promoter (2-3kb)	165327287	165482343	155057	2	10846	ENST00000649273.1	-2032	ENSG00000112541	PDE10A	phosphodiesterase 10A
chr6_165843534_165844047	514	Intron (ENST00000366882.7/10846, intron 1 of 19)	165773056	165775221	2166	2	105378114	ENST00000670033.1	-68313		LOC105378114	uncharacterized LOC105378114
chr6_166605942_166606178	237	Intron (ENST00000265678.9/6196, intron 1 of 20)	166583009	166586678	3670	2	353267	ENST00000444122.3	-19264	ENSG00000235272	RAMACL	RNA guanine-7 methyltransferase activating subunit like (pseudogene)
chr7_3113763_3114142	380	Intron (ENST00000667422.1/105375130, intron 1 of 1)	3094121	3118034	23914	2	105375130	ENST00000703009.1	3892	ENSG00000228334	LOC105375130	uncharacterized LOC105375130
chr7_4378471_4378995	525	Distal Intergenic	4232887	4237671	4785	1	221935	ENST00000467827.1	145584	ENSG00000146555	SDK1	sidekick cell adhesion molecule 1
chr7_6017589_6017868	280	Promoter (<=1kb)	6016877	6017011	135	1	109616999	ENST00000384488.1	712	ENSG00000207217	SNORA80D	small nucleolar RNA, H/ACA box 80D
chr7_11478234_11478461	228	Intron (ENST00000445839.5/105375153, intron 3 of 3)	11446302	11543059	96758	2	221981	ENST00000497575.1	64598	ENSG00000005108	THSD7A	thrombospondin type 1 domain containing 7A
chr7_15839506_15839945	440	Distal Intergenic	15736373	15796370	59998	2	105375167	ENST00000659664.1	-43136		LOC105375167	uncharacterized LOC105375167
chr7_21358046_21358286	241	Distal Intergenic	21428043	21477239	49197	1	6671	ENST00000432066.2	-69757	ENSG00000105866	SP4	Sp4 transcription factor
chr7_26216561_26217003	443	Distal Intergenic	26208133	26212423	4291	1	11335	ENST00000481057.1	8428	ENSG00000122565	CBX3	chromobox 3
chr7_30827302_30827552	251	Intron (ENST00000458257.5/100526825, intron 7 of 19)	30852273	30923812	71540	1	358	ENST00000509504.2	-24721	ENSG00000240583	AQP1	aquaporin 1 (Colton blood group)
chr7_38968067_38968328	262	Distal Intergenic	38977909	39468601	490693	1	11281	ENST00000518318.7	-9581	ENSG00000106536	POU6F2	POU class 6 homeobox 2
chr7_45601928_45602342	415	Intron (ENST00000432715.5/107, intron 3 of 9)	45574885	45664671	89787	1	107	ENST00000621543.1	27043	ENSG00000164742	ADCY1	adenylate cyclase 1
chr7_48292341_48292708	368	Intron (ENST00000435803.6/154664, intron 20 of 61)	48279276	48646283	367008	1	154664	ENST00000544596.5	13065	ENSG00000179869	ABCA13	ATP binding cassette subfamily A member 13
chr7_53632954_53633209	256	Distal Intergenic	53564167	53574555	10389	2	105375283	ENST00000653190.1	-58399	ENSG00000228627	GS1-278J22.2	uncharacterized GS1-278J22.2
chr7_53861827_53862152	326	Distal Intergenic	53770080	53811952	41873	2	401337	ENST00000660958.1	-49875	ENSG00000205628	LINC01446	long intergenic non-protein coding RNA 1446
chr7_64897309_64897548	240	Exon (ENST00000527278.5/10793, exon 4 of 8)	64903253	64924431	21179	1	10793	ENST00000489672.5	-5705	ENSG00000198039	ZNF273	zinc finger protein 273
chr7_68300004_68300288	285	Intron (ENST00000446187.2/105375341, intron 1 of 5)	68149548	68319636	170089	2	105375341	ENST00000446187.2	19348	ENSG00000226829	LOC105375341	uncharacterized LOC105375341
chr7_72409055_72409286	232	Intron (ENST00000395275.7/83698, intron 1 of 6)	71779491	72412338	632848	2	83698	ENST00000395275.7	3052	ENSG00000183166	CALN1	calneuron 1
chr7_78256133_78256545	413	Exon (ENST00000354212.9/9863, exon 10 of 22)	78256543	78285768	29226	2	9863	ENST00000636936.1	29223	ENSG00000187391	MAGI2	membrane associated guanylate kinase, WW and PDZ domain containing 2
chr7_98322640_98322926	287	Exon (ENST00000610062.1/ENST00000610062.1, exon 1 of 1)	98304196	98306957	2762	2	55971	ENST00000480580.1	-15683	ENSG00000006453	BAIAP2L1	BAR/IMD domain containing adaptor protein 2 like 1
chr7_100392211_100392425	215	Intron (ENST00000432297.6/29992, intron 3 of 4)	100397383	100409364	11982	1	29992	ENST00000695703.1	-4958	ENSG00000085514	PILRA	paired immunoglobin like type 2 receptor alpha
chr7_113988949_113989197	249	Intron (ENST00000449795.5/5506, intron 1 of 3)	113876777	113919009	42233	2	5506	ENST00000284601.4	-69940	ENSG00000154415	PPP1R3A	protein phosphatase 1 regulatory subunit 3A
chr7_115162878_115163268	391	Intron (ENST00000419883.1/104355291, intron 1 of 5)	115124708	115125937	1230	1	102724386	ENST00000659423.1	38170	ENSG00000225535	LINC01393	long intergenic non-protein coding RNA 1393
chr7_130056580_130056929	350	Distal Intergenic	130018287	130051451	33165	2	51530	ENST00000311873.9	-5129	ENSG00000091732	ZC3HC1	zinc finger C3HC-type containing 1
chr7_130142708_130142955	248	Promoter (<=1kb)	130141738	130142615	878	1	100128325	ENST00000470348.1	970	ENSG00000229196	LINC03008	long intergenic non-protein coding RNA 3008
chr7_132614430_132614732	303	Intron (ENST00000378539.5/91584, intron 2 of 4)	132484758	132648688	163931	2	91584	ENST00000378539.5	33956	ENSG00000221866	PLXNA4	plexin A4
chr7_137909622_137910229	608	Intron (ENST00000330387.11/64764, intron 4 of 11)	137912834	137928269	15436	2	64764	ENST00000420629.1	18040	ENSG00000182158	CREB3L2	cAMP responsive element binding protein 3 like 2
chr7_138110338_138110651	314	Intron (ENST00000468877.2/6718, intron 8 of 9)	138123758	138123821	64	1	100616226	ENST00000639714.1	-13107	ENSG00000284028	MIR4468	microRNA 4468
chr7_153239353_153239590	238	Distal Intergenic	153395484	153396921	1438	1	105375577	ENST00000649319.1	-155894		LOC105375577	uncharacterized LOC105375577
chr7_153827799_153828221	423	Distal Intergenic	153887097	154894285	1007189	1	1804	ENST00000404039.5	-58876	ENSG00000130226	DPP6	dipeptidyl peptidase like 6
chr7_155964590_155964820	231	Promoter (1-2kb)	155962632	155966343	3712	1	389602	ENST00000377722.2	1958	ENSG00000204876	LOC389602	uncharacterized LOC389602
chr7_156198268_156198551	284	Distal Intergenic	155962632	155966343	3712	1	389602	ENST00000377722.2	235636	ENSG00000204876	LOC389602	uncharacterized LOC389602
chr7_158542517_158542916	400	Intron (ENST00000389413.7/5799, intron 1 of 21)	158532718	158532813	96	2	693180	ENST00000384905.1	-9704	ENSG00000207637	MIR595	microRNA 595
chr7_159122174_159122568	395	Intron (ENST00000262178.7/7434, intron 2 of 12)	159116922	159144852	27931	2	7434	ENST00000421760.2	22284	ENSG00000106018	VIPR2	vasoactive intestinal peptide receptor 2
chr8_667656_668047	392	Promoter (1-2kb)	664622	669277	4656	2	157697	ENST00000523053.1	1230	ENSG00000104714	ERICH1	glutamate rich 1
chr8_4870691_4871039	349	Intron (ENST00000635120.2/64478, intron 1 of 69)	2938099	4994701	2056603	2	64478	ENST00000400186.7	123662	ENSG00000183117	CSMD1	CUB and Sushi multiple domains 1
chr8_5943826_5944063	238	Distal Intergenic	5853138	5854977	1840	2	107986908	ENST00000660498.1	-88849		LOC107986908	uncharacterized LOC107986908
chr8_20542773_20543114	342	Distal Intergenic	20350256	20372769	22514	1	105379314	ENST00000521139.1	192517		LOC105379314	uncharacterized LOC105379314
chr8_22676109_22676460	352	Distal Intergenic	22644588	22669148	24561	2	55909	ENST00000522268.1	-6961	ENSG00000147439	BIN3	bridging integrator 3
chr8_27239074_27239304	231	3' UTR	27241168	27258398	17231	2	81551	ENST00000522750.1	19094	ENSG00000015592	STMN4	stathmin 4
chr8_38605768_38606155	388	Distal Intergenic	38600661	38601200	540	2	286140	ENST00000524091.1	-4568		RNF5P1	ring finger protein 5 pseudogene 1
chr8_72662247_72662462	216	Intron (ENST00000523207.2/9312, intron 2 of 2)	72732045	72751843	19799	1	101926908	ENST00000519427.1	-69583	ENSG00000253726	LOC101926908	uncharacterized LOC101926908
chr8_75168936_75169223	288	Intron (ENST00000676364.1/ENST00000676364.1, intron 1 of 2)	75223544	75232249	8706	2	101805492	ENST00000522183.2	63026	ENSG00000249395	CASC9	cancer susceptibility 9
chr8_81923447_81923876	430	Exon (ENST00000670794.1/109729147, exon 3 of 3)	81912329	81923199	10871	1	109729147	ENST00000663542.1	11118	ENSG00000254689	LINC02235	long intergenic non-protein coding RNA 2235
chr8_82578859_82579305	447	Intron (ENST00000663058.1/105375931, intron 5 of 7)	82435411	82905347	469937	1	105375931	ENST00000658531.1	143448		LOC105375931	uncharacterized LOC105375931
chr8_83312945_83313373	429	Distal Intergenic	83403758	83408900	5143	1	103352670	ENST00000522365.1	-90385	ENSG00000253898	LINC01419	long intergenic non-protein coding RNA 1419
chr8_92165469_92165748	280	Distal Intergenic	92014798	92103286	88489	2	862	ENST00000518832.1	-62183	ENSG00000079102	RUNX1T1	RUNX1 partner transcriptional co-repressor 1
chr8_96082949_96083176	228	Distal Intergenic	96142333	96160806	18474	2	392255	ENST00000287020.7	77630	ENSG00000156466	GDF6	growth differentiation factor 6
chr8_98089205_98089519	315	Exon (ENST00000318528.8/203111, exon 2 of 3)	98102619	98106631	4013	2	10247	ENST00000519608.1	17112	ENSG00000132541	RIDA	reactive intermediate imine deaminase A homolog
chr8_115125178_115125415	238	Distal Intergenic	115414429	115492221	77793	2	7227	ENST00000518018.1	366806	ENSG00000104447	TRPS1	transcriptional repressor GATA binding 1
chr8_116938256_116938469	214	Promoter (<=1kb)	116938207	116944487	6281	1	441376	ENST00000378279.4	49	ENSG00000205002	AARD	alanine and arginine rich domain containing protein
chr8_131531813_131532143	331	Distal Intergenic	131904093	132013642	109550	1	23167	ENST00000254624.10	-371950	ENSG00000132294	EFR3A	EFR3 homolog A
chr8_136370301_136370517	217	Intron (ENST00000650445.2/107986980, intron 1 of 7)	136237236	136295232	57997	2	105375775	ENST00000660704.1	-75069		LOC105375775	uncharacterized LOC105375775
chr8_143502830_143503171	342	Intron (ENST00000262577.6/23144, intron 4 of 11)	143484497	143507840	23344	2	23144	ENST00000528401.1	4669	ENSG00000014164	ZC3H3	zinc finger CCCH-type containing 3
chr9_915493_915711	219	Intron (ENST00000382276.8/1761, intron 3 of 4)	976655	991732	15078	1	58524	ENST00000190165.3	-60944	ENSG00000064218	DMRT3	doublesex and mab-3 related transcription factor 3
chr9_9778200_9778420	221	Intron (ENST00000381196.9/5789, intron 5 of 45)	9799423	9803784	4362	1	105375972	ENST00000449531.1	-21003	ENSG00000230920	LOC105375972	uncharacterized LOC105375972
chr9_11077367_11077676	310	Distal Intergenic	11275314	11276314	1001	2	105375974	ENST00000437471.1	198638		LOC105375974	uncharacterized LOC105375974
chr9_32433134_32433500	367	Intron (ENST00000541043.5/48, intron 16 of 21)	32384643	32454769	70127	1	48	ENST00000309951.8	48491	ENSG00000122729	ACO1	aconitase 1
chr9_38462094_38462435	342	Exon (ENST00000637760.3/105376041, exon 6 of 6)	38437749	38504234	66486	1	105376042	ENST00000701648.1	24345		LOC105376042	uncharacterized LOC105376042
chr9_87502164_87502428	265	Intron (ENST00000358077.9/1612, intron 2 of 25)	87499006	87707382	208377	1	1612	ENST00000489291.5	3158	ENSG00000196730	DAPK1	death associated protein kinase 1
chr9_87507212_87507534	323	Intron (ENST00000358077.9/1612, intron 2 of 25)	87499006	87707382	208377	1	1612	ENST00000489291.5	8206	ENSG00000196730	DAPK1	death associated protein kinase 1
chr9_90349363_90349599	237	Intron (ENST00000659218.1/101927873, intron 2 of 2)	90300885	90427954	127070	2	101927873	ENST00000659218.1	78355	ENSG00000231107	LINC01508	long intergenic non-protein coding RNA 1508
chr9_93867941_93868340	400	Distal Intergenic	93819357	93819421	65	1	100422927	ENST00000584984.1	48584	ENSG00000265347	MIR4291	microRNA 4291
chr9_95564062_95564307	246	Distal Intergenic	95599545	95606286	6742	2	105376158	ENST00000419620.1	41979		LOC105376158	uncharacterized LOC105376158
chr9_105123429_105123801	373	Intron (ENST00000666856.1/112268038, intron 7 of 7)	105025932	105239221	213290	2	112268038	ENST00000666856.1	115420		LOC112268038	uncharacterized LOC112268038
chr9_107564081_107564910	830	Distal Intergenic	107488989	107490482	1494	2	9314	ENST00000420475.1	-73599	ENSG00000136826	KLF4	KLF transcription factor 4
chr9_111166224_111166677	454	Intron (ENST00000426204.1/105376219, intron 2 of 2)	111271156	111271214	59	2	102465800	ENST00000621931.1	104537	ENSG00000274263	MIR7702	microRNA 7702
chr9_113321191_113321416	226	Intron (ENST00000341761.8/114987, intron 8 of 10)	113302101	113303376	1276	2	138065	ENST00000443976.1	-17815	ENSG00000165188	RNF183	ring finger protein 183
chr9_119897657_119897944	288	Distal Intergenic	119935053	119937832	2780	1	106146149	ENST00000561476.1	-37109	ENSG00000261432	LINC01613	long intergenic non-protein coding RNA 1613
chr9_121696374_121696639	266	Intron (ENST00000259371.7/153090, intron 2 of 16)	121700559	121767066	66508	1	153090	ENST00000699487.1	-3920	ENSG00000136848	DAB2IP	DAB2 interacting protein
chr9_123914751_123914997	247	Intron (ENST00000373624.6/57706, intron 1 of 21)	123379654	123930107	550454	2	57706	ENST00000373624.6	15110	ENSG00000119522	DENND1A	DENN domain containing 1A
chr9_130987063_130987317	255	Distal Intergenic	131009174	131094473	85300	1	10319	ENST00000361069.9	-21857	ENSG00000050555	LAMC3	laminin subunit gamma 3
chr9_131521254_131521533	280	Promoter (<=1kb)	131521105	131522533	1429	1	10585	ENST00000494883.1	149	ENSG00000130714	POMT1	protein O-mannosyltransferase 1
chr9_137136126_137136405	280	Promoter (2-3kb)	137139154	137168756	29603	1	2902	ENST00000371561.8	-2749	ENSG00000176884	GRIN1	glutamate ionotropic receptor NMDA type subunit 1
chr9_137396963_137397329	367	Promoter (1-2kb)	137353900	137395408	41509	2	54932	ENST00000490886.5	-1555	ENSG00000187609	EXD3	exonuclease 3'-5' domain containing 3
chrX_5907320_5907534	215	Intron (ENST00000381093.6/57502, intron 4 of 5)	5840637	5903353	62717	2	57502	ENST00000477079.1	-3967	ENSG00000146938	NLGN4X	neuroligin 4 X-linked
chrX_7840484_7840828	345	Promoter (1-2kb)	7842262	7844143	1882	1	26609	ENST00000381059.7	-1434	ENSG00000182583	VCX	variable charge X-linked
chrX_11723784_11723999	216	Intron (ENST00000634846.1/ENST00000634846.1, intron 2 of 3)	11758159	11775747	17589	1	10943	ENST00000361672.6	-34160	ENSG00000005302	MSL3	MSL complex subunit 3
chrX_15295933_15296188	256	Intron (ENST00000380470.7/140456, intron 3 of 6)	15282319	15314559	32241	2	140456	ENST00000344384.8	18371	ENSG00000165192	ASB11	ankyrin repeat and SOCS box containing 11
chrX_16889454_16889667	214	Distal Intergenic	16844341	16870362	26022	2	5931	ENST00000380087.7	-19092	ENSG00000102054	RBBP7	RB binding protein 7, chromatin remodeling factor
chrX_23363150_23363387	238	Intron (ENST00000379361.5/139411, intron 1 of 2)	23335069	23393108	58040	1	139411	ENST00000456522.1	28081	ENSG00000165186	PTCHD1	patched domain containing 1
chrX_32851715_32852370	656	Promoter (1-2kb)	32573611	32849802	276192	2	1756	ENST00000447523.1	-1913	ENSG00000198947	DMD	dystrophin
chrX_36043728_36044216	489	Intron (ENST00000378653.8/286464, intron 25 of 63)	36035791	36145070	109280	1	286464	ENST00000378660.5	7937	ENSG00000165164	CFAP47	cilia and flagella associated protein 47
chrX_38400507_38400723	217	Intron (ENST00000465127.1/7102, intron 3 of 8)	38352605	38403667	51063	1	5009	ENST00000488812.1	47902	ENSG00000036473	OTC	ornithine transcarbamylase
chrX_56538098_56538323	226	Distal Intergenic	56563627	56567868	4242	1	29978	ENST00000338222.7	-25304	ENSG00000188021	UBQLN2	ubiquilin 2
chrX_56673882_56674262	381	Distal Intergenic	56729241	56817569	88329	1	550643	ENST00000637096.1	-54979	ENSG00000204272	NBDY	negative regulator of P-body association
chrX_66126855_66127075	221	Distal Intergenic	66162671	66268867	106197	1	9843	ENST00000519389.6	-35596	ENSG00000089472	HEPH	hephaestin
chrX_76625574_76625931	358	Distal Intergenic	76427710	76431342	3633	1	57692	ENST00000361470.4	197864	ENSG00000198934	MAGEE1	MAGE family member E1
chrX_77282877_77283233	357	Distal Intergenic	77447389	77457278	9890	1	8823	ENST00000439435.3	-164156	ENSG00000196468	FGF16	fibroblast growth factor 16
chrX_82240802_82241081	280	Distal Intergenic	82497669	82497924	256	2	117981790	ENST00000448435.2	256843		EIF3JP1	EIF3J pseudogene 1
chrX_84907910_84908153	244	Distal Intergenic	84934113	84934895	783	1	100131816	ENST00000602536.2	-25960	ENSG00000229547	UBE2DNL	ubiquitin conjugating enzyme E2 D N-terminal like (pseudogene)
chrX_90012630_90013062	433	Distal Intergenic	89921908	89922883	976	1	90316	ENST00000283891.6	90722	ENSG00000153779	TGIF2LX	TGFB induced factor homeobox 2 like X-linked
chrX_90040865_90041119	255	Distal Intergenic	89921908	89922883	976	1	90316	ENST00000283891.6	118957	ENSG00000153779	TGIF2LX	TGFB induced factor homeobox 2 like X-linked
chrX_96296348_96296626	279	Intron (ENST00000653599.1/ENST00000653599.1, intron 2 of 4)	96337236	96337912	677	2	643486	ENST00000605735.1	41286	ENSG00000271209	BRDTP1	bromodomain testis associated pseudogene 1
chrX_99796300_99796678	379	Distal Intergenic	100350662	100406515	55854	2	57526	ENST00000636150.1	609837	ENSG00000165194	PCDH19	protocadherin 19
chrX_104205918_104206269	352	Distal Intergenic	104186118	104191446	5329	1	139231	ENST00000299906.5	19800	ENSG00000123575	FAM199X	family with sequence similarity 199, X-linked
chrX_106138712_106139015	304	Distal Intergenic	106168305	106208955	40651	1	139221	ENST00000337685.6	-29290	ENSG00000157502	PWWP3B	PWWP domain containing 3B
chrX_113171922_113172136	215	Intron (ENST00000651919.1/101928437, intron 5 of 5)	112880563	113212186	331624	1	101928437	ENST00000651919.1	291359		LOC101928437	uncharacterized LOC101928437
chrX_117391106_117391340	235	Distal Intergenic	117897814	117947942	50129	2	90293	ENST00000371876.5	556602	ENSG00000003096	KLHL13	kelch like family member 13
chrX_118039238_118039530	293	Intron (ENST00000371882.5/90293, intron 1 of 6)	117920345	118028495	108151	2	90293	ENST00000453826.1	-10743	ENSG00000003096	KLHL13	kelch like family member 13
chrX_119036016_119036231	216	Distal Intergenic	119072993	119076765	3773	1	727838	ENST00000620151.4	-36762	ENSG00000277535	LOC727838	cancer/testis antigen family 47 member A11
chrX_132714412_132714699	288	Intron (ENST00000370833.7/90161, intron 2 of 4)	132735084	132758332	23249	2	90161	ENST00000602570.1	43633	ENSG00000171004	HS6ST2	heparan sulfate 6-O-sulfotransferase 2
chrX_138490093_138490642	550	Distal Intergenic	138667711	138667793	83	2	574507	ENST00000385065.3	177151	ENSG00000207800	MIR504	microRNA 504
chrX_141002431_141002721	291	Promoter (<=1kb)	141002594	141003706	1113	1	728695	ENST00000449283.2	0	ENSG00000227234	SPANXB1	SPANX family member B1
chrX_145343711_145344049	339	Distal Intergenic	145247503	145256208	8706	1	494118	ENST00000370493.4	96208	ENSG00000203923	SPANXN1	SPANX family member N1
chrX_151738556_151738936	381	Exon (ENST00000329903.5/1260, exon 2 of 7)	151734746	151745564	10819	1	1260	ENST00000329903.5	3810	ENSG00000183862	CNGA2	cyclic nucleotide gated channel subunit alpha 2
chrX_153372934_153373232	299	Distal Intergenic	153352029	153360110	8082	1	105373378	ENST00000438239.1	20905	ENSG00000063587	LOC105373378	uncharacterized LOC105373378
chrX_153813405_153813856	452	Intron (ENST00000164640.8/57595, intron 1 of 7)	153804879	153808139	3261	2	57595	ENST00000484792.5	-5266	ENSG00000067840	PDZD4	PDZ domain containing 4

## Sheet: Ctrl_ASO group enriched peaks
Table S5. Enriched Peaks in ILF2 ChIP sequencing (Ctrl_ASO group)
Peak_IDs	width	annotation	geneStart	geneEnd	geneLength	geneStrand	geneId	transcriptId	distanceToTSS	ENSEMBL	SYMBOL	GENENAME
chr1_1411634_1412039	406	Promoter (2-3kb)	1409096	1410618	1523	1	116435301	ENST00000607307.1	2538		MRPL20-DT	MRPL20 divergent transcript
chr1_7085752_7085957	206	Intron (ENST00000303635.12/23261, intron 3 of 22)	6874056	6887842	13787	1	23261	ENST00000467267.1	211696	ENSG00000171735	CAMTA1	calmodulin binding transcription activator 1
chr1_11455906_11456104	199	Distal Intergenic	11479155	11537551	58397	1	57540	ENST00000294484.7	-23051	ENSG00000204624	DISP3	dispatched RND transporter family member 3
chr1_11908461_11908712	252	Promoter (<=1kb)	11908152	11908271	120	1	26829	ENST00000362477.1	309	ENSG00000199347	RNU5E-1	RNA, U5E small nuclear 1
chr1_13542957_13543225	269	Distal Intergenic	13474973	13514003	39031	2	126755	ENST00000376085.4	-28954	ENSG00000162494	LRRC38	leucine rich repeat containing 38
chr1_13668360_13668678	319	Distal Intergenic	13700188	13825079	124892	1	7799	ENST00000311066.10	-31510	ENSG00000116731	PRDM2	PR/SET domain 2
chr1_15180483_15180725	243	Intron (ENST00000428417.5/55092, intron 1 of 2)	15168474	15171317	2844	2	727684	ENST00000625027.2	-9166	ENSG00000204464	TMEM51-AS2	TMEM51 antisense RNA 2
chr1_16078184_16078479	296	Distal Intergenic	16057769	16073651	15883	2	348487	ENST00000375662.5	-4533	ENSG00000185519	FAM131C	family with sequence similarity 131 member C
chr1_16616389_16616734	346	Promoter (2-3kb)	16599589	16613562	13974	2	55672	ENST00000599069.5	-2827	ENSG00000219481	NBPF1	NBPF member 1
chr1_17921931_17922177	247	Distal Intergenic	18015712	18045612	29901	1	105376812	ENST00000641892.1	-93535		LOC105376812	uncharacterized LOC105376812
chr1_22963375_22963738	364	Intron (ENST00000426928.7/646262, intron 3 of 7)	22953043	22972866	19824	2	646262	ENST00000426928.7	9128	ENSG00000215906	LACTBL1	lactamase beta like 1
chr1_24493705_24493908	204	Distal Intergenic	24502351	24536800	34450	1	11123	ENST00000538532.6	-8443	ENSG00000117602	RCAN3	RCAN family member 3
chr1_25732274_25732565	292	Intron (ENST00000374332.9/57134, intron 2 of 11)	25709602	25784450	74849	1	57134	ENST00000374329.1	22672	ENSG00000117643	MAN1C1	mannosidase alpha class 1C member 1
chr1_27665014_27665279	266	Promoter (<=1kb)	27660384	27666279	5896	2	111216282	ENST00000681370.1	1000	ENSG00000233975	LINC02574	long intergenic non-protein coding RNA 2574
chr1_28577403_28577628	226	Promoter (1-2kb)	28578749	28578822	74	2	692212	ENST00000408612.1	1194	ENSG00000221539	SNORD99	small nucleolar RNA, C/D box 99
chr1_30665393_30665592	200	Distal Intergenic	30713767	30716135	2369	2	4146	ENST00000494561.1	50543	ENSG00000162510	MATN1	matrilin 1
chr1_36050417_36050671	255	Intron (ENST00000634486.1/192669, intron 19 of 20)	36043264	36055262	11999	1	192669	ENST00000471099.1	7153	ENSG00000126070	AGO3	argonaute RISC catalytic component 3
chr1_42924198_42924759	562	Exon (ENST00000691915.1/ENST00000691915.1, exon 1 of 1)	42926249	42929499	3251	2	6513	ENST00000674545.1	4740	ENSG00000117394	SLC2A1	solute carrier family 2 member 1
chr1_43450036_43450267	232	Promoter (1-2kb)	43447776	43448644	869	2	100873952	ENST00000396885.2	-1392	ENSG00000229372	SZT2-AS1	SZT2 antisense RNA 1
chr1_44654764_44655033	270	Exon (ENST00000372242.7/107984950, exon 3 of 5)	44648308	44651723	3416	1	55182	ENST00000474956.1	6456	ENSG00000187147	RNF220	ring finger protein 220
chr1_44721563_44721887	325	Promoter (<=1kb)	44721786	44721902	117	2	26828	ENST00000362507.1	15	ENSG00000199377	RNU5F-1	RNA, U5F small nuclear 1
chr1_44819601_44819868	268	3' UTR	44819844	44823260	3417	2	8643	ENST00000438067.5	3392	ENSG00000117425	PTCH2	patched 2
chr1_48654805_48655152	348	Intron (ENST00000371839.6/84871, intron 7 of 13)	48727867	48758933	31067	2	79656	ENST00000476079.5	103781	ENSG00000162373	BEND5	BEN domain containing 5
chr1_51340329_51340573	245	Intron (ENST00000413473.6/22996, intron 1 of 17)	51287258	51345116	57859	2	22996	ENST00000413473.6	4543	ENSG00000085831	TTC39A	tetratricopeptide repeat domain 39A
chr1_54125615_54126134	520	Distal Intergenic	54132687	54153000	20314	2	200008	ENST00000530059.3	26866	ENSG00000157211	CDCP2	CUB domain containing protein 2
chr1_54270684_54271004	321	Intron (ENST00000326956.12/23648, intron 2 of 13)	54239096	54257266	18171	2	23648	ENST00000420121.5	-13418	ENSG00000157216	SSBP3	single stranded DNA binding protein 3
chr1_55260918_55261127	210	Intron (ENST00000643232.1/109729135, intron 1 of 1)	55225641	55225723	83	1	100616272	ENST00000581938.1	35277	ENSG00000265822	MIR4422	microRNA 4422
chr1_55381556_55381924	369	Intron (ENST00000643167.1/ENST00000643167.1, intron 1 of 3)	55225641	55225723	83	1	100616272	ENST00000581938.1	155915	ENSG00000265822	MIR4422	microRNA 4422
chr1_64645521_64645753	233	Intron (ENST00000651257.2/57685, intron 8 of 26)	64664200	64666140	1941	1	57685	ENST00000486580.1	-18447	ENSG00000158966	CACHD1	cache domain containing 1
chr1_85490766_85491204	439	Intron (ENST00000426972.8/23576, intron 2 of 6)	85482281	85496281	14001	2	107985054	ENST00000488557.6	5077
chr1_93847515_93847823	309	Promoter (<=1kb)	93561791	93847150	285360	2	8412	ENST00000370244.5	-365	ENSG00000137936	BCAR3	BCAR3 adaptor protein, NSP family member
chr1_94527099_94527556	458	Distal Intergenic	94532997	94536164	3168	2	2152	ENST00000478217.5	8608	ENSG00000117525	F3	coagulation factor III, tissue factor
chr1_111198324_111198836	513	Promoter (1-2kb)	111195970	111200121	4152	2	79961	ENST00000477586.5	1285	ENSG00000162777	DENND2D	DENN domain containing 2D
chr1_113718673_113718900	228	Intron (ENST00000369604.6/10745, intron 7 of 18)	113696831	113715212	18382	2	10745	ENST00000474926.5	-3461	ENSG00000116793	PHTF1	putative homeodomain transcription factor 1
chr1_116247642_116247925	284	Distal Intergenic	116289237	116297621	8385	2	105378920	ENST00000660713.1	49696		LOC105378920	uncharacterized LOC105378920
chr1_145465446_145465741	296	Exon (ENST00000605806.1/ENST00000605806.1, exon 1 of 1)	145290005	145425603	135599	2	100288142	ENST00000698833.1	-39843	ENSG00000162825	NBPF20	NBPF member 20
chr1_146035569_146035874	306	Promoter (<=1kb)	146017547	146036746	19200	2	148738	ENST00000636675.1	872	ENSG00000168509	HJV	hemojuvelin BMP co-receptor
chr1_147084297_147084948	652	Promoter (<=1kb)	147084616	147084756	141	2	101447996	ENST00000651973.1	0	ENSG00000286172	RNVU1-8	RNA, variant U1 small nuclear 8
chr1_148264674_148265097	424	Distal Intergenic	148208088	148255012	46925	2	101927468	ENST00000628063.2	-9662	ENSG00000227733	LOC101927468	uncharacterized LOC101927468
chr1_148334588_148334810	223	Promoter (<=1kb)	148334479	148334554	76	2	100847044	ENST00000635826.1	-34	ENSG00000283676	MIR5087	microRNA 5087
chr1_150101514_150101733	220	Intron (ENST00000643970.2/11311, intron 13 of 14)	150109175	150144925	35751	1	11311	ENST00000618148.1	-7442	ENSG00000136631	VPS45	vacuolar protein sorting 45 homolog
chr1_153533225_153533562	338	Promoter (2-3kb)	153534599	153535991	1393	2	6277	ENST00000368719.9	2429	ENSG00000197956	S100A6	S100 calcium binding protein A6
chr1_153560586_153560878	293	Distal Intergenic	153561340	153564233	2894	2	6273	ENST00000487430.7	3355	ENSG00000196754	S100A2	S100 calcium binding protein A2
chr1_153563805_153564366	562	Promoter (<=1kb)	153561340	153564233	2894	2	6273	ENST00000487430.7	0	ENSG00000196754	S100A2	S100 calcium binding protein A2
chr1_153564640_153565522	883	Promoter (<=1kb)	153561349	153565542	4194	2	6273	ENST00000368707.5	20	ENSG00000196754	S100A2	S100 calcium binding protein A2
chr1_154961593_154962115	523	Promoter (<=1kb)	154961825	154962623	799	1	101928120	ENST00000605085.1	0		LOC101928120	uncharacterized LOC101928120
chr1_155438157_155439073	917	3' UTR	155433178	155434262	1085	1	645682	ENST00000413175.2	4979	ENSG00000237872	POU5F1P4	POU class 5 homeobox 1 pseudogene 4
chr1_158920265_158920497	233	Distal Intergenic	158930796	158939120	8325	1	149628	ENST00000458222.5	-10299	ENSG00000163564	PYHIN1	pyrin and HIN domain family member 1
chr1_161399485_161399899	415	Exon (ENST00000636161.1/ENST00000636161.1, exon 1 of 2)	161364733	161367876	3144	2	257177	ENST00000367974.2	-31609	ENSG00000188931	CFAP126	cilia and flagella associated protein 126
chr1_167714557_167714905	349	Distal Intergenic	167721950	167765896	43947	1	9019	ENST00000464954.1	-7045	ENSG00000197965	MPZL1	myelin protein zero like 1
chr1_168078580_168078783	204	Distal Intergenic	168085266	168089565	4300	2	23432	ENST00000478868.1	10782	ENSG00000143147	GPR161	G protein-coupled receptor 161
chr1_171454552_171454771	220	Distal Intergenic	171485530	171593511	107982	1	23215	ENST00000647382.2	-30759	ENSG00000117523	PRRC2C	proline rich coiled-coil 2C
chr1_173862272_173862684	413	Promoter (2-3kb)	173863902	173864871	970	2	60674	ENST00000454813.1	2187	ENSG00000234741	GAS5	growth arrest specific 5
chr1_176229878_176230111	234	Intron (ENST00000691278.1/ENST00000691278.1, intron 4 of 4)	175944831	176207286	262456	2	64326	ENST00000367669.8	-22592	ENSG00000143207	COP1	COP1 E3 ubiquitin ligase
chr1_179086917_179087178	262	Promoter (1-2kb)	179085798	179088496	2699	1	64222	ENST00000495145.1	1119	ENSG00000186283	TOR3A	torsin family 3 member A
chr1_179837822_179838024	203	Distal Intergenic	179816184	179818191	2008	2	105371634	ENST00000415218.1	-19631		LOC105371634	uncharacterized LOC105371634
chr1_180537015_180537236	222	Intron (ENST00000673955.1/148756, intron 1 of 2)	180547436	180566517	19082	1	148756	ENST00000662859.1	-10200	ENSG00000236719	OVAAL	ovarian adenocarcinoma amplified long non-coding RNA
chr1_180918723_180919195	473	Intron (ENST00000367588.9/57710, intron 3 of 8)	180913154	180914056	903	1	57710	ENST00000496210.1	5569	ENSG00000135835	KIAA1614	KIAA1614
chr1_204506320_204506603	284	Distal Intergenic	204516379	204558119	41741	1	4194	ENST00000367183.7	-9776	ENSG00000198625	MDM4	MDM4 regulator of p53
chr1_209428238_209428436	199	Promoter (<=1kb)	209428817	209432551	3735	1	642587	ENST00000429156.6	-381	ENSG00000230937	MIR205HG	MIR205 host gene
chr1_209429014_209429346	333	Promoter (<=1kb)	209429083	209430621	1539	1	642587	ENST00000444286.1	0	ENSG00000230937	MIR205HG	MIR205 host gene
chr1_209433384_209433661	278	Promoter (1-2kb)	209432133	209432242	110	1	406988	ENST00000384891.1	1251	ENSG00000284485	MIR205	microRNA 205
chr1_209433966_209434432	467	Promoter (1-2kb)	209432133	209432242	110	1	406988	ENST00000384891.1	1833	ENSG00000284485	MIR205	microRNA 205
chr1_209611698_209612355	658	Exon (ENST00000361322.3/57172, exon 11 of 13)	209607794	209611944	4151	1	57172	ENST00000494990.1	3904	ENSG00000008118	CAMK1G	calcium/calmodulin dependent protein kinase IG
chr1_209612706_209613242	537	3' UTR	209607794	209611944	4151	1	57172	ENST00000494990.1	4912	ENSG00000008118	CAMK1G	calcium/calmodulin dependent protein kinase IG
chr1_216206421_216206635	215	Intron (ENST00000307340.8/7399, intron 16 of 71)	216194051	216204366	10316	1	105372918	ENST00000420867.1	12370		USH2A-AS1	USH2A antisense RNA 1
chr1_223293616_223293904	289	Promoter (1-2kb)	223264407	223292569	28163	2	55061	ENST00000497669.1	-1047	ENSG00000143502	SUSD4	sushi domain containing 4
chr1_225463891_225464367	477	Promoter (<=1kb)	225447991	225465283	17293	2	105373110	ENST00000433058.1	916		LINC02765	long intergenic non-protein coding RNA 2765
chr1_230315040_230315274	235	3' UTR	230323542	230336295	12754	2	79605	ENST00000530424.1	21021	ENSG00000177614	PGBD5	piggyBac transposable element derived 5
chr1_244750276_244750543	268	Distal Intergenic	244729701	244731015	1315	2	122455338	ENST00000640271.3	-19261	ENSG00000284188	LOC122455338	uncharacterized LOC122455338
chr1_247141415_247141662	248	Intron (ENST00000472531.5/7678, intron 3 of 3)	247123503	247149950	26448	2	7678	ENST00000476312.1	8288	ENSG00000196418	ZNF124	zinc finger protein 124
chr10_1025212_1025528	317	Promoter (<=1kb)	1018910	1025859	6950	2	91734	ENST00000277517.2	331	ENSG00000148377	IDI2	isopentenyl-diphosphate delta isomerase 2
chr10_2935691_2935946	256	Distal Intergenic	3066333	3101554	35222	1	5214	ENST00000607886.5	-130387	ENSG00000067057	PFKP	phosphofructokinase, platelet
chr10_3776188_3776385	198	3' UTR	3775996	3780217	4222	2	1316	ENST00000461124.1	3832	ENSG00000067082	KLF6	KLF transcription factor 6
chr10_3785448_3786210	763	Promoter (<=1kb)	3775997	3785281	9285	2	1316	ENST00000542957.1	-167	ENSG00000067082	KLF6	KLF transcription factor 6
chr10_13200132_13200731	600	Promoter (1-2kb)	13198763	13204526	5764	1	55388	ENST00000485659.1	1369	ENSG00000065328	MCM10	minichromosome maintenance 10 replication initiation factor
chr10_15277755_15278038	284	Intron (ENST00000378116.9/221061, intron 2 of 7)	15214171	15248707	34537	2	221061	ENST00000477161.1	-29048	ENSG00000148468	FAM171A1	family with sequence similarity 171 member A1
chr10_22229342_22229607	266	Distal Intergenic	22208475	22218015	9541	2	340900	ENST00000422359.3	-11327	ENSG00000223601	EBLN1	endogenous Bornavirus like nucleoprotein 1
chr10_24803873_24804120	248	Distal Intergenic	24583614	24723887	140274	2	57584	ENST00000396432.7	-79986	ENSG00000107863	ARHGAP21	Rho GTPase activating protein 21
chr10_27079652_27079913	262	Promoter (<=1kb)	27077023	27080720	3698	2	22852	ENST00000466890.1	807	ENSG00000107890	ANKRD26	ankyrin repeat domain containing 26
chr10_33836386_33836780	395	Distal Intergenic	33759713	33772702	12990	2	100505583	ENST00000658358.1	-63684	ENSG00000261683	LINC00838	long intergenic non-protein coding RNA 838
chr10_34870323_34870820	498	Distal Intergenic	34815767	34816386	620	1	100505601	ENST00000446211.1	54556	ENSG00000226386	PARD3-DT	PARD3 divergent transcript
chr10_60343832_60344060	229	Intron (ENST00000280772.7/288, intron 1 of 43)	60234688	60300482	65795	2	288	ENST00000503925.1	-43350	ENSG00000151150	ANK3	ankyrin 3
chr10_62317181_62317407	227	Distal Intergenic	62289521	62304033	14513	1	105378325	ENST00000442753.1	27660		LINC02621	long intergenic non-protein coding RNA 2621
chr10_70083192_70083542	351	Intron (ENST00000676699.1/55506, intron 2 of 7)	70090060	70095753	5694	1	55506	ENST00000678425.1	-6518	ENSG00000099284	MACROH2A2	macroH2A.2 histone
chr10_70251387_70251608	222	3' UTR	70218779	70233911	15133	2	5464	ENST00000495346.1	-17476	ENSG00000180817	PPA1	inorganic pyrophosphatase 1
chr10_72274323_72274722	400	Promoter (<=1kb)	72273924	72276036	2113	1	54541	ENST00000681898.1	399	ENSG00000168209	DDIT4	DNA damage inducible transcript 4
chr10_72276023_72276333	311	Promoter (2-3kb)	72273924	72276036	2113	1	54541	ENST00000681898.1	2099	ENSG00000168209	DDIT4	DNA damage inducible transcript 4
chr10_73911154_73911841	688	Promoter (<=1kb)	73911147	73913753	2607	1	5328	ENST00000494287.1	7	ENSG00000122861	PLAU	plasminogen activator, urokinase
chr10_73961008_73961205	198	Distal Intergenic	73995193	74120160	124968	1	7414	ENST00000623461.3	-33988	ENSG00000035403	VCL	vinculin
chr10_75582412_75582691	280	Intron (ENST00000611255.5/83938, intron 2 of 6)	75601240	76036136	434897	1	83938	ENST00000593817.1	-18549	ENSG00000148655	LRMDA	leucine rich melanocyte differentiation associated
chr10_77361647_77361938	292	Intron (ENST00000418515.1/101929286, intron 2 of 4)	77354404	77376613	22210	1	101929286	ENST00000418515.1	7243		KCNMA1-AS3	KCNMA1 antisense RNA 3
chr10_85826581_85826895	315	Intron (ENST00000327946.12/2894, intron 8 of 15)	85601993	85613133	11141	2	2894	ENST00000552278.2	-213448	ENSG00000182771	GRID1	glutamate ionotropic receptor delta type subunit 1
chr10_86180331_86180638	308	Intron (ENST00000327946.12/2894, intron 3 of 15)	86264694	86264788	95	2	442911	ENST00000362234.2	84150	ENSG00000199104	MIR346	microRNA 346
chr10_91538949_91539181	233	Intron (ENST00000688440.1/100188947, intron 1 of 3)	91306962	91575231	268270	2	100188947	ENST00000700888.1	36050		HECTD2-AS1	HECTD2 antisense RNA 1
chr10_92634322_92634529	208	Intron (ENST00000676757.1/3832, intron 14 of 21)	92593130	92655395	62266	1	3832	ENST00000260731.5	41192	ENSG00000138160	KIF11	kinesin family member 11
chr10_96118839_96119129	291	Distal Intergenic	96129715	96163759	34045	1	9849	ENST00000614149.2	-10586	ENSG00000177853	ZNF518A	zinc finger protein 518A
chr10_97139626_97139843	218	Intron (ENST00000266058.9/6585, intron 4 of 36)	97102779	97103733	955	1	100505540	ENST00000661744.1	36847	ENSG00000234855	SLIT1-AS1	SLIT1 antisense RNA 1
chr10_97675511_97675793	283	3' UTR	97677424	97687241	9818	2	60370	ENST00000370626.4	11448	ENSG00000119986	AVPI1	arginine vasopressin induced 1
chr10_114334513_114334731	219	Intron (ENST00000304129.9/84632, intron 2 of 18)	114300516	114305133	4618	2	84632	ENST00000486300.1	-29380	ENSG00000169129	AFAP1L2	actin filament associated protein 1 like 2
chr10_116903328_116903638	311	Intron (ENST00000369207.3/387712, intron 10 of 10)	116859034	116911788	52755	1	387712	ENST00000369207.3	44294	ENSG00000188316	ENO4	enolase 4
chr10_119506708_119507279	572	Intron (ENST00000369103.3/6001, intron 4 of 4)	119515523	119516488	966	2	6001	ENST00000473563.1	9209	ENSG00000148908	RGS10	regulator of G protein signaling 10
chr10_122789962_122790241	280	Intron (ENST00000636837.3/375940, intron 15 of 23)	122796691	122799180	2490	1	375940	ENST00000605982.1	-6450	ENSG00000176584	DMBT1L1	deleted in malignant brain tumors 1 like 1 (pseudogene)
chr10_124567137_124567373	237	Intron (ENST00000368842.10/64077, intron 6 of 6)	124546025	124617888	71864	1	64077	ENST00000482963.1	21112	ENSG00000107902	LHPP	phospholysine phosphohistidine inorganic pyrophosphate phosphatase
chr10_124621029_124621306	278	3' UTR	124612833	124613384	552	1	64077	ENST00000492187.1	8196	ENSG00000107902	LHPP	phospholysine phosphohistidine inorganic pyrophosphate phosphatase
chr10_125419851_125420105	255	Distal Intergenic	125574371	125578445	4075	1	100169752	ENST00000446081.5	-154266	ENSG00000237675	TEX36-AS1	TEX36 antisense RNA 1
chr10_126038026_126038273	248	Exon (ENST00000368679.8/8038, exon 20 of 23)	126064695	126067006	2312	2	8038	ENST00000482291.1	28733	ENSG00000148848	ADAM12	ADAM metallopeptidase domain 12
chr10_128228901_128229354	454	Intron (ENST00000626518.2/101927381, intron 1 of 3)	128181136	128317726	136591	1	101927381	ENST00000630252.1	47765	ENSG00000280953	LINC01163	long intergenic non-protein coding RNA 1163
chr10_129515032_129515316	285	Intron (ENST00000306010.8/4255, intron 1 of 4)	129467262	129537164	69903	1	4255	ENST00000482547.1	47770	ENSG00000170430	MGMT	O-6-methylguanine-DNA methyltransferase
chr10_131234961_131235166	206	Intron (ENST00000483040.1/256536, intron 1 of 11)	131092391	131260336	167946	2	256536	ENST00000483040.1	25170	ENSG00000176769	TCERG1L	transcription elongation regulator 1 like
chr11_755660_755873	214	Promoter (<=1kb)	755744	760257	4514	1	6888	ENST00000533796.1	0	ENSG00000177156	TALDO1	transaldolase 1
chr11_838758_839453	696	Promoter (1-2kb)	836803	838016	1214	1	977	ENST00000532075.1	1955	ENSG00000177697	CD151	CD151 molecule (Raph blood group)
chr11_2285425_2285624	200	Distal Intergenic	2268498	2270588	2091	2	430	ENST00000331289.5	-14837	ENSG00000183734	ASCL2	achaete-scute family bHLH transcription factor 2
chr11_4803981_4804258	278	Promoter (<=1kb)	4803433	4804380	948	2	119695	ENST00000624978.1	122	ENSG00000279270	OR52R1	olfactory receptor family 52 subfamily R member 1
chr11_7173719_7173942	224	Distal Intergenic	7234766	7234837	72	1	100313774	ENST00000408776.1	-60824	ENSG00000221703	MIR302E	microRNA 302e
chr11_10307433_10308112	680	Promoter (<=1kb)	10308313	10410838	102526	1	100130460	ENST00000527261.5	-201		CAND1.11	uncharacterized LOC100130460
chr11_22567719_22568008	290	Distal Intergenic	22625642	22749190	123549	1	2620	ENST00000528582.5	-57634	ENSG00000148935	GAS2	growth arrest specific 2
chr11_50270433_50270689	257	Intron (ENST00000688204.1/441601, intron 6 of 6)	50284949	50295334	10386	2	441601	ENST00000531666.4	24645	ENSG00000255042	SEPTIN7P11	septin 7 pseudogene 11
chr11_59550841_59551324	484	Intron (ENST00000659845.1/102723575, intron 1 of 1)	59545602	59558882	13281	1	102723575	ENST00000659845.1	5239		LOC102723575	uncharacterized LOC102723575
chr11_63263407_63263622	216	Distal Intergenic	63268022	63311221	43200	1	387775	ENST00000682643.1	-4400	ENSG00000184999	SLC22A10	solute carrier family 22 member 10
chr11_63829155_63829503	349	Distal Intergenic	63838928	63911019	72092	1	2011	ENST00000377810.8	-9425	ENSG00000072518	MARK2	microtubule affinity regulating kinase 2
chr11_64523753_64523994	242	Distal Intergenic	64555690	64571527	15838	1	55867	ENST00000377585.7	-31696	ENSG00000168065	SLC22A11	solute carrier family 22 member 11
chr11_64893641_64893887	247	Promoter (<=1kb)	64891426	64893455	2030	2	105369343	ENST00000687544.1	-186		MIR194-2HG	MIR194-2 host gene
chr11_65126574_65126845	272	Promoter (1-2kb)	65124725	65127363	2639	1	740	ENST00000532671.1	1849	ENSG00000149792	MRPL49	mitochondrial ribosomal protein L49
chr11_66348064_66348364	301	Promoter (<=1kb)	66347950	66363760	15811	1	102724064	ENST00000531602.1	114	ENSG00000255468	B4GAT1-DT	B4GAT1 divergent transcript
chr11_68459979_68460299	321	Promoter (<=1kb)	68460731	68537669	76939	1	55291	ENST00000530427.5	-432	ENSG00000110075	PPP6R3	protein phosphatase 6 regulatory subunit 3
chr11_73363333_73363652	320	Promoter (<=1kb)	73364214	73365122	909	1	9828	ENST00000536481.1	-562	ENSG00000110237	ARHGEF17	Rho guanine nucleotide exchange factor 17
chr11_76235466_76236047	582	Distal Intergenic	76210956	76216025	5070	2	107984359	ENST00000531538.1	-19441	ENSG00000255362	LINC02761	long intergenic non-protein coding RNA 2761
chr11_92436462_92436674	213	Intron (ENST00000525166.6/120114, intron 2 of 27)	92355186	92524949	169764	1	120114	ENST00000528921.1	81276	ENSG00000165323	FAT3	FAT atypical cadherin 3
chr11_92890032_92890401	370	Intron (ENST00000525166.6/120114, intron 27 of 27)	92886865	92890626	3762	1	120114	ENST00000469900.1	3167	ENSG00000165323	FAT3	FAT atypical cadherin 3
chr11_112677180_112677412	233	Intron (ENST00000691666.1/ENST00000691666.1, intron 3 of 4)	112698772	112721151	22380	2	105369496	ENST00000662440.1	43739	ENSG00000287006	LOC105369496	uncharacterized LOC105369496
chr11_113081326_113081567	242	Intron (ENST00000621518.4/4684, intron 2 of 19)	113130694	113205666	74973	1	4684	ENST00000525973.5	-49127	ENSG00000149294	NCAM1	neural cell adhesion molecule 1
chr11_118809235_118809672	438	Distal Intergenic	118747763	118791164	43402	2	1656	ENST00000534980.7	-18071	ENSG00000110367	DDX6	DEAD-box helicase 6
chr11_121145756_121145953	198	Promoter (<=1kb)	121146076	121191339	45264	1	7007	ENST00000646278.1	-123	ENSG00000109927	TECTA	tectorin alpha
chr11_130486636_130486926	291	Distal Intergenic	130448645	130476645	28001	1	170689	ENST00000299164.4	37991	ENSG00000166106	ADAMTS15	ADAM metallopeptidase with thrombospondin type 1 motif 15
chr12_926886_927163	278	3' UTR	925463	933058	7596	2	5893	ENST00000545564.5	5895	ENSG00000002016	RAD52	RAD52 homolog, DNA repair protein
chr12_2980771_2981005	235	Intron (ENST00000358409.7/7004, intron 2 of 11)	2959944	3020759	60816	1	7004	ENST00000443986.3	20827	ENSG00000197905	TEAD4	TEA domain transcription factor 4
chr12_6538706_6539430	725	Promoter (2-3kb)	6536605	6538374	1770	1	2597	ENST00000619601.1	2101	ENSG00000111640	GAPDH	glyceraldehyde-3-phosphate dehydrogenase
chr12_6871108_6871310	203	Promoter (1-2kb)	6870017	6870571	555	1	7167	ENST00000474253.1	1091	ENSG00000111669	TPI1	triosephosphate isomerase 1
chr12_12595251_12595484	234	Distal Intergenic	12611827	12637574	25748	1	1389	ENST00000540224.1	-16343	ENSG00000111269	CREBL2	cAMP responsive element binding protein like 2
chr12_16091713_16092164	452	Distal Intergenic	15985172	16036340	51169	1	51071	ENST00000532573.1	106541	ENSG00000023697	DERA	deoxyribose-phosphate aldolase
chr12_19665621_19665920	300	Intron (ENST00000512223.6/121536, intron 4 of 4)	19500129	19553272	53144	1	121536	ENST00000398731.3	165492	ENSG00000139154	AEBP2	AE binding protein 2
chr12_30272558_30272894	337	Intron (ENST00000552182.6/105369717, intron 1 of 3)	30230785	30296664	65880	2	105369717	ENST00000551202.1	23770		LINC02386	long intergenic non-protein coding RNA 2386
chr12_30518055_30518550	496	Distal Intergenic	30631626	30637149	5524	2	10526	ENST00000535598.1	118599	ENSG00000133704	IPO8	importin 8
chr12_31617381_31617960	580	Intron (ENST00000418260.3/ENST00000418260.3, intron 1 of 1)	31591312	31615666	24355	1	100874249	ENST00000537346.1	26069	ENSG00000255867	DENND5B-AS1	DENND5B antisense RNA 1
chr12_51235274_51235691	418	Distal Intergenic	51238724	51243931	5208	1	9802	ENST00000449723.7	-3033	ENSG00000183283	DAZAP2	DAZ associated protein 2
chr12_52513793_52513990	198	Promoter (2-3kb)	52514996	52516196	1201	2	3852	ENST00000552952.1	2206	ENSG00000186081	KRT5	keratin 5
chr12_52516500_52517628	1129	Promoter (<=1kb)	52515113	52517888	2776	2	3852	ENST00000549511.5	260	ENSG00000186081	KRT5	keratin 5
chr12_52518562_52519486	925	Promoter (<=1kb)	52517181	52519117	1937	2	3852	ENST00000551188.5	0	ENSG00000186081	KRT5	keratin 5
chr12_54131923_54132345	423	Exon (ENST00000660808.3/400043, exon 2 of 2)	54126213	54142493	16281	1	400043	ENST00000635070.1	5710	ENSG00000250742	LINC02381	long intergenic non-protein coding RNA 2381
chr12_56117990_56118300	311	Promoter (<=1kb)	56118250	56131099	12850	1	23344	ENST00000551790.5	0	ENSG00000139641	ESYT1	extended synaptotagmin 1
chr12_56165400_56165639	240	3' UTR	56160036	56162970	2935	1	4637	ENST00000546845.1	5364	ENSG00000092841	MYL6	myosin light chain 6
chr12_56662325_56662535	211	Distal Intergenic	56638376	56645984	7609	2	506	ENST00000547808.5	-16341	ENSG00000110955	ATP5F1B	ATP synthase F1 subunit beta
chr12_57154293_57154560	268	Exon (ENST00000243077.8/4035, exon 7 of 89)	57144620	57147619	3000	2	105751187	ENST00000555461.1	-6674	ENSG00000259125	LRP1-AS	LRP1 antisense RNA
chr12_64943982_64944229	248	Intron (ENST00000674281.1/23329, intron 16 of 16)	64920845	64982524	61680	2	109729131	ENST00000510459.2	38295	ENSG00000248995	LINC02231	long intergenic non-protein coding RNA 2231
chr12_74791044_74791484	441	Distal Intergenic	74537835	74545430	7596	1	552889	ENST00000519948.4	253209	ENSG00000253719	ATXN7L3B	ataxin 7 like 3B
chr12_76032267_76032469	203	Promoter (<=1kb)	76025447	76031776	6330	2	22822	ENST00000619060.1	-491	ENSG00000139289	PHLDA1	pleckstrin homology like domain family A member 1
chr12_80823272_80823548	277	Intron (ENST00000552864.6/8825, intron 4 of 5)	80832533	80832629	97	2	693202	ENST00000385030.1	9081	ENSG00000207763	MIR617	microRNA 617
chr12_82285290_82285600	311	Intron (ENST00000552377.5/29080, intron 3 of 3)	82352839	82356121	3283	2	29080	ENST00000550589.1	70521	ENSG00000133773	CCDC59	coiled-coil domain containing 59
chr12_94322705_94322940	236	Intron (ENST00000552632.5/51134, intron 1 of 4)	94306449	94331798	25350	2	51134	ENST00000552632.5	8858	ENSG00000173588	CEP83	centrosomal protein 83
chr12_96035917_96036156	240	Promoter (<=1kb)	96002990	96035641	32652	2	4048	ENST00000548852.5	-276	ENSG00000111144	LTA4H	leukotriene A4 hydrolase
chr12_96150210_96150441	232	Distal Intergenic	96160692	96172126	11435	2	105369924	ENST00000637833.1	21685		LINC02452	long intergenic non-protein coding RNA 2452
chr12_100080202_100080412	211	Intron (ENST00000279907.12/23074, intron 11 of 20)	100072786	100092890	20105	2	23074	ENST00000550544.5	12478	ENSG00000111647	BLTP3B	bridge-like lipid transfer protein family member 3B
chr12_103907885_103908177	293	Promoter (1-2kb)	103892994	103906272	13279	2	253724	ENST00000552065.1	-1613	ENSG00000214198	TTC41P	tetratricopeptide repeat domain 41, pseudogene
chr12_108150535_108150806	272	Intron (ENST00000547525.6/9671, intron 1 of 8)	108131781	108195583	63803	1	9671	ENST00000551734.1	18754	ENSG00000075035	WSCD2	WSC domain containing 2
chr12_109447559_109447791	233	3' UTR	109443562	109455523	11962	1	283446	ENST00000543960.1	3997	ENSG00000174527	MYO1H	myosin IH
chr12_112209984_112210525	542	Exon (ENST00000550722.5/283450, exon 50 of 76)	112194997	112201438	6442	2	283450	ENST00000548896.1	-8546	ENSG00000173064	HECTD4	HECT domain E3 ubiquitin protein ligase 4
chr12_116763456_116763653	198	Intron (ENST00000392549.7/84900, intron 5 of 11)	116759935	116810520	50586	1	84900	ENST00000677328.1	3521	ENSG00000135119	RNFT2	ring finger protein, transmembrane 2
chr12_120238980_120239259	280	Intron (ENST00000267257.11/5829, intron 1 of 10)	120222676	120248748	26073	2	5829	ENST00000551327.5	9489	ENSG00000089159	PXN	paxillin
chr12_120291730_120292039	310	Promoter (<=1kb)	120291763	120291903	141	2	26834	ENST00000365668.1	0	ENSG00000202538	RNU4-2	RNA, U4 small nuclear 2
chr12_122185673_122185953	281	Promoter (1-2kb)	122184519	122187477	2959	1	254050	ENST00000538800.1	1154	ENSG00000158113	LRRC43	leucine rich repeat containing 43
chr12_124909231_124909847	617	Distal Intergenic	124913035	124914074	1040	2	7316	ENST00000541272.1	4227	ENSG00000150991	UBC	ubiquitin C
chr12_124913931_124914171	241	Promoter (<=1kb)	124913035	124914074	1040	2	7316	ENST00000541272.1	0	ENSG00000150991	UBC	ubiquitin C
chr12_124927785_124928017	233	Distal Intergenic	124913587	124917368	3782	2	7316	ENST00000542416.1	-10417	ENSG00000150991	UBC	ubiquitin C
chr12_124939531_124940120	590	Distal Intergenic	124947601	124948615	1015	2	57647	ENST00000507267.2	8495	ENSG00000150990	DHX37	DEAH-box helicase 37
chr12_132448285_132448488	204	Distal Intergenic	132489551	132585188	95638	1	57666	ENST00000434748.2	-41063	ENSG00000112787	FBRSL1	fibrosin like 1
chr13_25984244_25984486	243	Intron (ENST00000381655.7/51761, intron 35 of 36)	25975580	25977504	1925	2	105370122	ENST00000692041.1	-6740	ENSG00000289125	LOC105370122	uncharacterized LOC105370122
chr13_27383385_27383653	269	Distal Intergenic	27424619	27435823	11205	1	2971	ENST00000381140.10	-40966	ENSG00000122034	GTF3A	general transcription factor IIIA
chr13_30673845_30674122	278	Distal Intergenic	30713478	30764425	50948	1	241	ENST00000617770.4	-39356	ENSG00000132965	ALOX5AP	arachidonate 5-lipoxygenase activating protein
chr13_38840170_38840408	239	Intron (ENST00000280481.9/341640, intron 6 of 23)	38821798	38827570	5773	2	100874073	ENST00000448887.1	-12600		FREM2-AS1	FREM2 antisense RNA 1
chr13_42948098_42948298	201	Intron (ENST00000313640.11/94240, intron 6 of 12)	42895009	42963583	68575	2	94240	ENST00000535677.5	15285	ENSG00000133106	EPSTI1	epithelial stromal interaction 1
chr13_47873037_47873325	289	Intron (ENST00000643584.1/8803, intron 13 of 13)	47905329	47907357	2029	2	107984570	ENST00000435617.1	34032		LINC00444	long intergenic non-protein coding RNA 444
chr13_57409417_57409676	260	Distal Intergenic	57631744	57729311	97568	1	27253	ENST00000377918.8	-222068	ENSG00000118946	PCDH17	protocadherin 17
chr13_58397996_58398253	258	Distal Intergenic	58211697	58233117	21421	2	106144531	ENST00000454780.2	-164879	ENSG00000232954	LINC00374	long intergenic non-protein coding RNA 374
chr13_63367191_63367443	253	Distal Intergenic	63183096	63328129	145034	2	104355293	ENST00000439454.3	-39062	ENSG00000227564	LINC00376	long intergenic non-protein coding RNA 376
chr13_76842957_76843215	259	Intron (ENST00000646457.1/ENST00000646457.1, intron 3 of 3)	76552807	76846524	293718	2	105370264	ENST00000648060.1	3309		LOC105370264	uncharacterized LOC105370264
chr13_77047557_77047806	250	Intron (ENST00000638147.2/1203, intron 3 of 4)	77044689	77052700	8012	2	23077	ENST00000695082.1	4894	ENSG00000005810	MYCBP2	MYC binding protein 2
chr13_94549234_94549499	266	Exon (ENST00000701323.1/ENST00000701323.1, exon 1 of 1)	94579286	94581189	1904	2	23483	ENST00000470480.1	31690	ENSG00000088451	TGDS	TDP-glucose 4,6-dehydratase
chr13_100438207_100438431	225	Intron (ENST00000376279.7/5095, intron 20 of 22)	100464440	100480285	15846	2	100885777	ENST00000451662.1	41854		PCCA-AS1	PCCA antisense RNA 1
chr13_110104682_110104917	236	Intron (ENST00000670698.1/101927646, intron 1 of 1)	110036292	110129136	92845	2	101927646	ENST00000670698.1	24219		LOC101927646	uncharacterized LOC101927646
chr14_20610041_20610318	278	Promoter (<=1kb)	20584047	20609884	25838	2	122651	ENST00000413502.1	-157	ENSG00000173464	RNASE11	ribonuclease A family member 11 (inactive)
chr14_20613347_20613879	533	Distal Intergenic	20584047	20609884	25838	2	122651	ENST00000413502.1	-3463	ENSG00000173464	RNASE11	ribonuclease A family member 11 (inactive)
chr14_20625245_20625510	266	Distal Intergenic	20584047	20609884	25838	2	122651	ENST00000413502.1	-15361	ENSG00000173464	RNASE11	ribonuclease A family member 11 (inactive)
chr14_20633087_20633390	304	Distal Intergenic	20640696	20641691	996	2	341799	ENST00000320704.3	8301	ENSG00000181803	OR6S1	olfactory receptor family 6 subfamily S member 1
chr14_20652973_20653585	613	Distal Intergenic	20640696	20641691	996	2	341799	ENST00000320704.3	-11282	ENSG00000181803	OR6S1	olfactory receptor family 6 subfamily S member 1
chr14_20657369_20657623	255	Distal Intergenic	20640696	20641691	996	2	341799	ENST00000320704.3	-15678	ENSG00000181803	OR6S1	olfactory receptor family 6 subfamily S member 1
chr14_20662939_20663415	477	Distal Intergenic	20684177	20694186	10010	1	283	ENST00000336811.10	-20762	ENSG00000214274	ANG	angiogenin
chr14_22929593_22929842	250	Promoter (<=1kb)	22929607	22956374	26768	1	101926933	ENST00000668190.1	0	ENSG00000257285	PRMT5-DT	PRMT5 divergent transcript
chr14_23320960_23321895	936	Promoter (<=1kb)	23321457	23326163	4707	1	8106	ENST00000216727.9	0	ENSG00000100836	PABPN1	poly(A) binding protein nuclear 1
chr14_44693580_44693817	238	Distal Intergenic	44763153	44768069	4917	2	101927351	ENST00000665816.1	74252		LINC02302	long intergenic non-protein coding RNA 2302
chr14_52129383_52129610	228	Promoter (<=1kb)	52111122	52129625	18504	2	105370498	ENST00000555852.1	15		LINC02319	long intergenic non-protein coding RNA 2319
chr14_61310660_61310953	294	Intron (ENST00000555185.5/5583, intron 1 of 3)	61321579	61550976	229398	1	5583	ENST00000332981.11	-10626	ENSG00000027075	PRKCH	protein kinase C eta
chr14_65014703_65015073	371	Promoter (<=1kb)	65015538	65062652	47115	1	100529261	ENST00000554334.5	-465	ENSG00000125954	CHURC1-FNTB	CHURC1-FNTB readthrough
chr14_67119495_67119841	347	Intron (ENST00000315266.9/10243, intron 15 of 21)	67113070	67169136	56067	1	10243	ENST00000555503.1	6425	ENSG00000171723	GPHN	gephyrin
chr14_67581070_67581332	263	Promoter (<=1kb)	67580895	67585602	4708	1	57475	ENST00000558366.5	175	ENSG00000054690	PLEKHH1	pleckstrin homology, MyTH4 and FERM domain containing H1
chr14_68790317_68790726	410	Promoter (<=1kb)	68787660	68791243	3584	2	677	ENST00000555997.1	517	ENSG00000185650	ZFP36L1	ZFP36 ring finger protein like 1
chr14_68792146_68792545	400	Promoter (<=1kb)	68787662	68793067	5406	2	677	ENST00000439696.3	522	ENSG00000185650	ZFP36L1	ZFP36 ring finger protein like 1
chr14_70540855_70541070	216	Intron (ENST00000556646.1/ENST00000556646.1, intron 1 of 2)	70522362	70535015	12654	2	8748	ENST00000652041.1	-5840	ENSG00000134007	ADAM20	ADAM metallopeptidase domain 20
chr14_75738842_75739134	293	Intron (ENST00000298832.14/23093, intron 15 of 31)	75735195	75744726	9532	1	23093	ENST00000554878.1	3647	ENSG00000119685	TTLL5	tubulin tyrosine ligase like 5
chr14_77925090_77925498	409	Promoter (1-2kb)	77923232	77935012	11781	1	57143	ENST00000555217.1	1858	ENSG00000063761	ADCK1	aarF domain containing kinase 1
chr14_94649996_94650243	248	Distal Intergenic	94641318	94646720	5403	1	388007	ENST00000478994.3	8678	ENSG00000187483	SERPINA13P	serpin family A member 13, pseudogene
chr14_98851648_98851977	330	Distal Intergenic	98711662	98716173	4512	1	283598	ENST00000546029.2	139986	ENSG00000176605	LINC02914	long intergenic non-protein coding RNA 2914
chr14_99557368_99557571	204	Intron (ENST00000380243.9/317762, intron 1 of 5)	99516265	99572975	56711	2	317762	ENST00000556348.1	15404	ENSG00000205476	CCDC85C	coiled-coil domain containing 85C
chr14_100767958_100768361	404	Distal Intergenic	100779410	100829185	49776	1	55384	ENST00000556407.5	-11049	ENSG00000214548	MEG3	maternally expressed 3
chr14_103828033_103828358	326	Intron (ENST00000202556.14/23368, intron 1 of 16)	103754165	103840107	85943	2	23368	ENST00000554106.5	11749	ENSG00000088808	PPP1R13B	protein phosphatase 1 regulatory subunit 13B
chr15_26629964_26630273	310	Promoter (<=1kb)	26615297	26629178	13882	2	2562	ENST00000556166.2	-786	ENSG00000166206	GABRB3	gamma-aminobutyric acid type A receptor subunit beta3
chr15_33395804_33396029	226	Intron (ENST00000415757.7/6263, intron 1 of 102)	33311068	33503738	192671	1	6263	ENST00000634750.1	84736	ENSG00000198838	RYR3	ryanodine receptor 3
chr15_39581058_39581506	449	Promoter (<=1kb)	39581079	39582407	1329	1	7057	ENST00000397591.2	0	ENSG00000137801	THBS1	thrombospondin 1
chr15_39581715_39582919	1205	Promoter (<=1kb)	39581079	39599466	18388	1	7057	ENST00000260356.6	636	ENSG00000137801	THBS1	thrombospondin 1
chr15_39587280_39587608	329	Promoter (<=1kb)	39587431	39588785	1355	1	7057	ENST00000497720.1	0	ENSG00000137801	THBS1	thrombospondin 1
chr15_39588141_39588788	648	Promoter (<=1kb)	39588848	39589843	996	1	7057	ENST00000490247.1	-60	ENSG00000137801	THBS1	thrombospondin 1
chr15_39591281_39591498	218	Promoter (<=1kb)	39590928	39591618	691	1	7057	ENST00000560894.1	353	ENSG00000137801	THBS1	thrombospondin 1
chr15_39593450_39593709	260	Promoter (<=1kb)	39594068	39595551	1484	1	7057	ENST00000559746.1	-359	ENSG00000137801	THBS1	thrombospondin 1
chr15_40097707_40097982	276	Intron (ENST00000354670.9/90427, intron 4 of 4)	40091787	40106086	14300	2	90427	ENST00000431415.3	8104	ENSG00000104081	BMF	Bcl2 modifying factor
chr15_40593783_40594048	266	Promoter (<=1kb)	40594020	40664342	70323	1	57082	ENST00000346991.9	0	ENSG00000137812	KNL1	kinetochore scaffold 1
chr15_40948738_40949000	263	Exon (ENST00000560114.1/ENST00000560114.1, exon 1 of 1)	40952962	40955822	2861	1	79094	ENST00000444189.7	-3962	ENSG00000128965	CHAC1	ChaC glutathione specific gamma-glutamylcyclotransferase 1
chr15_43391426_43391623	198	Promoter (2-3kb)	43394081	43405323	11243	1	27229	ENST00000563963.1	-2458	ENSG00000137822	TUBGCP4	tubulin gamma complex associated protein 4
chr15_45198472_45198889	418	Promoter (2-3kb)	45175380	45201116	25737	2	90525	ENST00000561278.1	2227	ENSG00000138606	SHF	Src homology 2 domain containing F
chr15_45201075_45201355	281	Promoter (<=1kb)	45167214	45201175	33962	2	90525	ENST00000290894.12	0	ENSG00000138606	SHF	Src homology 2 domain containing F
chr15_48778565_48778830	266	Intron (ENST00000380950.7/22995, intron 12 of 26)	48768973	48773531	4559	2	22995	ENST00000559398.1	-5034	ENSG00000103995	CEP152	centrosomal protein 152
chr15_51606983_51607255	273	Intron (ENST00000251076.9/23312, intron 1 of 42)	51547332	51603701	56370	2	23312	ENST00000560421.5	-3282	ENSG00000104093	DMXL2	Dmx like 2
chr15_53011112_53011540	429	Distal Intergenic	53035170	53130344	95175	1	105370822	ENST00000692805.1	-23630	ENSG00000259237	LINC02490	long intergenic non-protein coding RNA 2490
chr15_60397503_60397709	207	Promoter (<=1kb)	60352383	60397338	44956	2	302	ENST00000560367.6	-165	ENSG00000182718	ANXA2	annexin A2
chr15_65324113_65324442	330	Distal Intergenic	65331104	65334641	3538	2	9543	ENST00000559231.1	10199	ENSG00000174498	IGDCC3	immunoglobulin superfamily DCC subclass member 3
chr15_65869043_65869309	267	Promoter (<=1kb)	65869456	65888247	18792	1	8766	ENST00000564910.5	-147	ENSG00000103769	RAB11A	RAB11A, member RAS oncogene family
chr15_66497779_66498044	266	Promoter (<=1kb)	66490636	66497780	7145	2	10302	ENST00000562411.5	0	ENSG00000174446	SNAPC5	small nuclear RNA activating complex polypeptide 5
chr15_67491683_67491895	213	Promoter (1-2kb)	67490015	67502260	12246	1	64799	ENST00000558759.1	1668	ENSG00000103599	IQCH	IQ motif containing H
chr15_70634313_70634642	330	Promoter (<=1kb)	70635249	70637314	2066	1	104548973	ENST00000629082.1	-607	ENSG00000280515	SALRNA2	senescence associated long non-coding RNA 2
chr15_71115802_71116245	444	Promoter (<=1kb)	71115665	71215238	99574	1	79875	ENST00000620694.1	137	ENSG00000187720	THSD4	thrombospondin type 1 domain containing 4
chr15_72170637_72170834	198	Promoter (<=1kb)	72163695	72170379	6685	2	196996	ENST00000564129.5	-258	ENSG00000175318	GRAMD2A	GRAM domain containing 2A
chr15_72197903_72198156	254	Promoter (<=1kb)	72159806	72197787	37982	2	196996	ENST00000309731.12	-116	ENSG00000175318	GRAMD2A	GRAM domain containing 2A
chr15_73130679_73130886	208	Intron (ENST00000339362.9/4756, intron 5 of 29)	73135985	73305198	169214	1	4756	ENST00000560328.1	-5099	ENSG00000067141	NEO1	neogenin 1
chr15_76376142_76376340	199	Exon (ENST00000563290.6/49855, exon 29 of 32)	76381564	76385251	3688	2	49855	ENST00000567601.1	8911	ENSG00000140386	SCAPER	S-phase cyclin A associated protein in the ER
chr15_80199573_80199856	284	3' UTR	80177407	80186351	8945	1	2184	ENST00000559217.1	22166	ENSG00000103876	FAH	fumarylacetoacetate hydrolase
chr15_89210580_89210993	414	Promoter (<=1kb)	89210002	89211843	1842	2	6017	ENST00000563254.1	850	ENSG00000140522	RLBP1	retinaldehyde binding protein 1
chr15_89334891_89335411	521	Promoter (<=1kb)	89316320	89334861	18542	2	5428	ENST00000442287.6	-30	ENSG00000140521	POLG	DNA polymerase gamma, catalytic subunit
chr15_92220408_92220626	219	Intron (ENST00000561674.1/ENST00000561674.1, intron 2 of 3)	92153563	92163208	9646	1	28232	ENST00000555513.1	66845	ENSG00000176463	SLCO3A1	solute carrier organic anion transporter family member 3A1
chr15_99404381_99404645	265	Distal Intergenic	99396613	99401315	4703	2	105371018	ENST00000559569.1	-3066		LINC02244	long intergenic non-protein coding RNA 2244
chr15_100845052_100845251	200	Distal Intergenic	100849561	100860037	10477	1	105369201	ENST00000557962.1	-4310	ENSG00000272808	GCAWKR	gastric cancer associated WDR5 and KAT2A binding lncRNA
chr16_636673_636903	231	Promoter (<=1kb)	636817	638620	1804	1	100287175	ENST00000619377.1	0		LOC100287175	uncharacterized LOC100287175
chr16_1713242_1713470	229	Promoter (<=1kb)	1713527	1714219	693	2	101929480	ENST00000570022.2	749	ENSG00000261399	MAPK8IP3-AS1	MAPK8IP3 antisense RNA 1
chr16_1782169_1782405	237	Promoter (<=1kb)	1776714	1782505	5792	2	90864	ENST00000564709.5	100	ENSG00000162032	SPSB3	splA/ryanodine receptor domain and SOCS box containing 3
chr16_1961227_1961901	675	Promoter (<=1kb)	1962334	1962466	133	2	574042	ENST00000384084.1	565	ENSG00000206811	SNORA10	small nucleolar RNA, H/ACA box 10
chr16_3022874_3023088	215	Promoter (<=1kb)	3022625	3023942	1318	2	54985	ENST00000248089.8	854	ENSG00000103145	HCFC1R1	host cell factor C1 regulator 1
chr16_3152811_3153014	204	Distal Intergenic	3147128	3148073	946	1	197350	ENST00000576807.1	5683	ENSG00000228146	CASP16P	caspase 16, pseudogene
chr16_3157332_3157619	288	Exon (ENST00000570843.1/ENST00000570843.1, exon 1 of 1)	3147128	3148073	946	1	197350	ENST00000576807.1	10204	ENSG00000228146	CASP16P	caspase 16, pseudogene
chr16_3171940_3172404	465	Distal Intergenic	3188204	3206554	18351	1	4992	ENST00000652759.1	-15800	ENSG00000168124	OR1F1	olfactory receptor family 1 subfamily F member 1
chr16_3184049_3184325	277	Distal Intergenic	3188204	3206554	18351	1	4992	ENST00000652759.1	-3879	ENSG00000168124	OR1F1	olfactory receptor family 1 subfamily F member 1
chr16_11061789_11062144	356	Intron (ENST00000703130.1/23274, intron 18 of 22)	11024867	11048512	23646	1	23274	ENST00000463459.1	36922	ENSG00000038532	CLEC16A	C-type lectin domain containing 16A
chr16_12629776_12629994	219	Distal Intergenic	12556353	12557694	1342	2	105371085	ENST00000563116.1	-72082		LOC105371085	uncharacterized LOC105371085
chr16_14285770_14286095	326	Distal Intergenic	14301389	14326761	25373	1	100129781	ENST00000634265.2	-15294	ENSG00000262454	MIR193BHG	MIR193b-365a host gene
chr16_17568550_17568787	238	Distal Intergenic	17101769	17470960	369192	2	64131	ENST00000261381.7	-97590	ENSG00000103489	XYLT1	xylosyltransferase 1
chr16_23051260_23051594	335	Distal Intergenic	23067979	23072548	4570	2	57478	ENST00000567975.1	20954	ENSG00000103404	USP31	ubiquitin specific peptidase 31
chr16_23820520_23820790	271	Distal Intergenic	23835983	24220611	384629	1	5579	ENST00000321728.12	-15193	ENSG00000166501	PRKCB	protein kinase C beta
chr16_48056475_48056680	206	Distal Intergenic	48084055	48086640	2586	2	94160	ENST00000532355.1	29960	ENSG00000140798	ABCC12	ATP binding cassette subfamily C member 12
chr16_56610074_56610364	291	Promoter (1-2kb)	56608690	56609497	808	1	4502	ENST00000567300.1	1384	ENSG00000125148	MT2A	metallothionein 2A
chr16_57058861_57059321	461	Promoter (<=1kb)	57059183	57062004	2822	1	84166	ENST00000535284.1	0	ENSG00000140853	NLRC5	NLR family CARD domain containing 5
chr16_57299791_57300705	915	Distal Intergenic	57256755	57284672	27918	2	51090	ENST00000569059.5	-15119	ENSG00000102934	PLLP	plasmolipin
chr16_66941633_66941853	221	Promoter (<=1kb)	66941886	66942723	838	1	8824	ENST00000567128.1	-33	ENSG00000172831	CES2	carboxylesterase 2
chr16_67936345_67936545	201	Promoter (<=1kb)	67935328	67936847	1520	2	5699	ENST00000570304.1	302	ENSG00000205220	PSMB10	proteasome 20S subunit beta 10
chr16_71426421_71426684	264	Promoter (<=1kb)	71366933	71426464	59532	2	105371332	ENST00000567469.2	0		LOC105371332	uncharacterized LOC105371332
chr16_71904170_71904442	273	Intron (ENST00000568581.5/9798, intron 2 of 4)	71895589	71921400	25812	1	9798	ENST00000539186.5	8581	ENSG00000182149	IST1	IST1 factor associated with ESCRT-III
chr16_73482116_73482397	282	Intron (ENST00000641790.1/100506172, intron 2 of 3)	73418272	73421396	3125	1	100506172	ENST00000662417.1	63844	ENSG00000258779	LINC01568	long intergenic non-protein coding RNA 1568
chr16_85813381_85813721	341	Distal Intergenic	85805069	85807031	1963	1	1327	ENST00000562929.1	8312	ENSG00000131143	COX4I1	cytochrome c oxidase subunit 4I1
chr16_85854273_85854485	213	Intron (ENST00000701831.1/ENST00000701831.1, intron 1 of 1)	85899116	85922606	23491	1	3394	ENST00000696884.1	-44631	ENSG00000140968	IRF8	interferon regulatory factor 8
chr16_87383882_87384200	319	Promoter (<=1kb)	87383953	87404779	20827	1	81631	ENST00000650688.1	0	ENSG00000140941	MAP1LC3B	microtubule associated protein 1 light chain 3 beta
chr16_87722450_87722724	275	Intron (ENST00000567298.5/54758, intron 7 of 16)	87710798	87726917	16120	2	54758	ENST00000562913.5	4193	ENSG00000104731	KLHDC4	kelch domain containing 4
chr16_88711227_88711451	225	Promoter (1-2kb)	88709959	88715386	5428	1	348180	ENST00000566637.5	1268	ENSG00000174177	CTU2	cytosolic thiouridylase subunit 2
chr16_89564725_89565402	678	Promoter (2-3kb)	89562370	89563438	1069	1	6137	ENST00000472354.1	2355	ENSG00000167526	RPL13	ribosomal protein L13
chr16_89720621_89720959	339	Promoter (<=1kb)	89707134	89720898	13765	2	9605	ENST00000389386.8	0	ENSG00000075399	VPS9D1	VPS9 domain containing 1
chr17_4914980_4915332	353	Intron (ENST00000649830.1/1145, intron 1 of 10)	4897771	4903098	5328	2	1145	ENST00000649488.2	-11882	ENSG00000108556	CHRNE	cholinergic receptor nicotinic epsilon subunit
chr17_5225612_5225819	208	Intron (ENST00000573772.3/100130950, intron 4 of 4)	5213012	5234823	21812	2	388325	ENST00000571800.5	9004	ENSG00000161929	SCIMP	SLP adaptor and CSK interacting membrane protein
chr17_7579634_7579845	212	Promoter (<=1kb)	7579638	7580479	842	1	968	ENST00000584502.1	0	ENSG00000129226	CD68	CD68 molecule
chr17_8125615_8126014	400	Promoter (1-2kb)	8120592	8124106	3515	2	84667	ENST00000541682.7	-1509	ENSG00000179111	HES7	hes family bHLH transcription factor 7
chr17_8138770_8139067	298	Distal Intergenic	8141216	8142191	976	2	5187	ENST00000583677.1	3124	ENSG00000179094	PER1	period circadian regulator 1
chr17_8186745_8187755	1011	Promoter (<=1kb)	8186945	8187004	60	1	100616406	ENST00000635897.1	0	ENSG00000283160	MIR4521	microRNA 4521
chr17_8221405_8221703	299	Promoter (2-3kb)	8220624	8224043	3420	2	284029	ENST00000315707.4	2340	ENSG00000178977	LINC00324	long intergenic non-protein coding RNA 324
chr17_8226588_8227136	549	Promoter (2-3kb)	8220624	8224043	3420	2	284029	ENST00000315707.4	-2545	ENSG00000178977	LINC00324	long intergenic non-protein coding RNA 324
chr17_8376593_8376843	251	Promoter (<=1kb)	8356902	8376681	19780	2	124751	ENST00000649935.1	0	ENSG00000184619	KRBA2	KRAB-A domain containing 2
chr17_11514478_11514793	316	Intron (ENST00000441885.8/388336, intron 3 of 5)	11598470	11612833	14364	1	1770	ENST00000579828.5	-83677	ENSG00000007174	DNAH9	dynein axonemal heavy chain 9
chr17_17462519_17462891	373	Distal Intergenic	17476994	17485592	8599	1	55090	ENST00000580462.1	-14103	ENSG00000141026	MED9	mediator complex subunit 9
chr17_17807593_17807835	243	Promoter (1-2kb)	17809282	17810689	1408	1	10743	ENST00000582514.1	-1447	ENSG00000108557	RAI1	retinoic acid induced 1
chr17_19502572_19502825	254	Intron (ENST00000584348.5/55244, intron 1 of 6)	19495385	19555309	59925	1	55244	ENST00000584348.5	7187	ENSG00000142494	SLC47A1	solute carrier family 47 member 1
chr17_19508009_19508287	279	Intron (ENST00000584348.5/55244, intron 1 of 6)	19495385	19555309	59925	1	55244	ENST00000584348.5	12624	ENSG00000142494	SLC47A1	solute carrier family 47 member 1
chr17_21228366_21228634	269	Intron (ENST00000439136.2/107984969, intron 2 of 2)	21214331	21230035	15705	1	107984969	ENST00000439136.2	14035	ENSG00000235530	TMEM11-DT	TMEM11 divergent transcript
chr17_27965018_27965361	344	Intron (ENST00000661257.1/105371708, intron 2 of 4)	27929548	27974223	44676	2	105371708	ENST00000567574.1	8862	ENSG00000260019	LINC01992	long intergenic non-protein coding RNA 1992
chr17_29670532_29670779	248	Intron (ENST00000581474.1/ENST00000581474.1, intron 1 of 1)	29639627	29640825	1199	1	107984990	ENST00000581240.1	30905		LOC107984990	uncharacterized LOC107984990
chr17_30197256_30197494	239	3' UTR	30198476	30203682	5207	2	6532	ENST00000578609.1	6188	ENSG00000108576	SLC6A4	solute carrier family 6 member 4
chr17_39153563_39153917	355	Promoter (<=1kb)	39067132	39153232	86101	2	57125	ENST00000461225.5	-331	ENSG00000161381	PLXDC1	plexin domain containing 1
chr17_40472138_40472501	364	Distal Intergenic	40477804	40478648	845	2	84951	ENST00000582747.1	6147	ENSG00000131746	TNS4	tensin 4
chr17_40473607_40475966	2360	Promoter (2-3kb)	40477804	40478648	845	2	84951	ENST00000582747.1	2682	ENSG00000131746	TNS4	tensin 4
chr17_41579635_41580641	1007	Promoter (2-3kb)	41582309	41583455	1147	2	3861	ENST00000441550.2	2814	ENSG00000186847	KRT14	keratin 14
chr17_41581524_41581851	328	Promoter (1-2kb)	41582309	41583455	1147	2	3861	ENST00000441550.2	1604	ENSG00000186847	KRT14	keratin 14
chr17_41584226_41585967	1742	Promoter (<=1kb)	41583249	41584471	1223	2	3861	ENST00000476662.1	0	ENSG00000186847	KRT14	keratin 14
chr17_41620447_41621833	1387	Promoter (<=1kb)	41619485	41621201	1717	2	3872	ENST00000649249.1	0	ENSG00000128422	KRT17	keratin 17
chr17_41624123_41624599	477	Promoter (<=1kb)	41619442	41624575	5134	2	3872	ENST00000311208.13	0	ENSG00000128422	KRT17	keratin 17
chr17_41748217_41748676	460	Distal Intergenic	41722640	41734644	12005	2	9001	ENST00000341193.9	-13573	ENSG00000173805	HAP1	huntingtin associated protein 1
chr17_43101377_43101634	258	Intron (ENST00000357654.9/672, intron 6 of 22)	43094170	43104891	10722	2	672	ENST00000473961.5	3257	ENSG00000012048	BRCA1	BRCA1 DNA repair associated
chr17_44484970_44485237	268	Intron (ENST00000591680.6/23131, intron 1 of 7)	44401408	44503389	101982	2	23131	ENST00000590041.5	18152	ENSG00000186566	GPATCH8	G-patch domain containing 8
chr17_49191981_49192773	793	Distal Intergenic	49202791	49208912	6122	2	2793	ENST00000503070.5	16139	ENSG00000167083	GNGT2	G protein subunit gamma transducin 2
chr17_50055295_50056224	930	Promoter (<=1kb)	50050349	50055739	5391	2	284080	ENST00000499842.1	0	ENSG00000246640	PICART1	p53 inducible cancer associated RNA transcript 1
chr17_65455882_65456098	217	Promoter (1-2kb)	65457541	65458408	868	1	105827617	ENST00000579474.1	-1443	ENSG00000263520	LINC02563	long intergenic non-protein coding RNA 2563
chr17_68019842_68020108	267	Distal Intergenic	68035636	68046854	11219	1	3838	ENST00000676594.1	-15528	ENSG00000182481	KPNA2	karyopherin subunit alpha 2
chr17_75034983_75035288	306	Promoter (2-3kb)	75032612	75063263	30652	1	23510	ENST00000581589.5	2371	ENSG00000180901	KCTD2	potassium channel tetramerization domain containing 2
chr17_75610672_75611037	366	Promoter (<=1kb)	75610699	75626484	15786	1	80022	ENST00000642007.2	0	ENSG00000266714	MYO15B	myosin XVB
chr17_75761805_75762176	372	Promoter (2-3kb)	75763383	75765133	1751	2	2584	ENST00000589030.1	2957	ENSG00000108479	GALK1	galactokinase 1
chr17_75762527_75763714	1188	Promoter (1-2kb)	75763383	75765133	1751	2	2584	ENST00000589030.1	1419	ENSG00000108479	GALK1	galactokinase 1
chr17_77213638_77213908	271	Promoter (<=1kb)	77212715	77214347	1633	1	6397	ENST00000588721.1	923	ENSG00000129657	SEC14L1	SEC14 like lipid binding 1
chr17_78027980_78028280	301	Intron (ENST00000696270.1/57690, intron 3 of 22)	78031522	78067910	36389	1	57690	ENST00000585438.1	-3242	ENSG00000078687	TNRC6C	trinucleotide repeat containing adaptor 6C
chr17_79127903_79128102	200	Intron (ENST00000583458.5/146713, intron 3 of 13)	79089367	79115580	26214	2	146713	ENST00000648001.1	-12323	ENSG00000167281	RBFOX3	RNA binding fox-1 homolog 3
chr17_80640508_80640727	220	Intron (ENST00000574767.5/57521, intron 2 of 11)	80708933	80754104	45172	1	57521	ENST00000572733.1	-68206	ENSG00000141564	RPTOR	regulatory associated protein of MTOR complex 1
chr17_82494660_82494865	206	Distal Intergenic	82484808	82488259	3452	1	26502	ENST00000578820.1	9852	ENSG00000141562	NARF	nuclear prelamin A recognition factor
chr18_1318591_1318850	260	Intron (ENST00000584090.5/56651, intron 2 of 6)	1269535	1279331	9797	2	56651	ENST00000663392.1	-39260		LINC00470	long intergenic non-protein coding RNA 470
chr18_2857574_2857964	391	Intron (ENST00000254528.4/84034, intron 2 of 7)	2847006	2916003	68998	1	84034	ENST00000254528.4	10568	ENSG00000132205	EMILIN2	elastin microfibril interfacer 2
chr18_3214522_3214723	202	Intron (ENST00000580139.1/101927044, intron 2 of 4)	3066953	3219849	152897	2	8736	ENST00000261606.11	5126	ENSG00000101605	MYOM1	myomesin 1
chr18_4532922_4533130	209	Distal Intergenic	3496032	4455307	959276	2	9229	ENST00000315677.8	-77615	ENSG00000170579	DLGAP1	DLG associated protein 1
chr18_11771682_11771949	268	Intron (ENST00000334049.11/2774, intron 4 of 11)	11753548	11868586	115039	1	2774	ENST00000590228.1	18134	ENSG00000141404	GNAL	G protein subunit alpha L
chr18_12451444_12451710	267	Promoter (<=1kb)	12449573	12452610	3038	2	56907	ENST00000498803.5	900	ENSG00000134278	SPIRE1	spire type actin nucleation factor 1
chr18_23958007_23958472	466	Exon (ENST00000582300.2/107985181, exon 2 of 2)	23949893	23954799	4907	1	3909	ENST00000588004.1	8114	ENSG00000053747	LAMA3	laminin subunit alpha 3
chr18_45860080_45860346	267	Promoter (1-2kb)	45855353	45858651	3299	2	57724	ENST00000587262.1	-1429	ENSG00000152223	EPG5	ectopic P-granules 5 autophagy tethering factor
chr18_48315963_48316220	258	Intron (ENST00000590800.6/201501, intron 2 of 4)	48041033	48338391	297359	2	201501	ENST00000585404.5	22171	ENSG00000184828	ZBTB7C	zinc finger and BTB domain containing 7C
chr18_57053070_57053326	257	Distal Intergenic	57057888	57070003	12116	2	100885779	ENST00000642403.1	16677	ENSG00000258609	LINC-ROR	long intergenic non-protein coding RNA, regulator of reprogramming
chr18_59940500_59940815	316	Distal Intergenic	59900036	59902963	2928	1	5366	ENST00000590596.1	40464	ENSG00000141682	PMAIP1	phorbol-12-myristate-13-acetate-induced protein 1
chr18_63392543_63392750	208	Intron (ENST00000238497.10/9525, intron 10 of 10)	63390863	63397124	6262	2	9525	ENST00000588323.1	4374	ENSG00000119541	VPS4B	vacuolar protein sorting 4 homolog B
chr18_69469669_69469947	279	Promoter (<=1kb)	69469931	69471736	1806	1	105372179	ENST00000584741.1	0	ENSG00000264845	LOC105372179	uncharacterized LOC105372179
chr18_75881843_75882042	200	Distal Intergenic	75696044	75712851	16808	2	100505853	ENST00000662762.1	-168992	ENSG00000261194	LINC01898	long intergenic non-protein coding RNA 1898
chr18_76148601_76148827	227	Distal Intergenic	76123425	76124145	721	1	339298	ENST00000578560.1	25176	ENSG00000263547	LOC339298	uncharacterized LOC339298
chr18_77613247_77613488	242	Distal Intergenic	77421619	77561044	139426	1	107985172	ENST00000583629.2	191628		LOC107985172	uncharacterized LOC107985172
chr18_78414746_78415026	281	Distal Intergenic	77971334	77993731	22398	2	101927715	ENST00000661306.1	-421015	ENSG00000265843	LINC01029	long intergenic non-protein coding RNA 1029
chr19_730115_730313	199	Promoter (<=1kb)	731092	746927	15836	1	5064	ENST00000633534.1	-779	ENSG00000099864	PALM	paralemmin
chr19_2692285_2692606	322	Intron (ENST00000382159.8/2788, intron 1 of 4)	2514993	2683691	168699	2	2788	ENST00000587867.1	-8594	ENSG00000176533	GNG7	G protein subunit gamma 7
chr19_3232844_3233172	329	Intron (ENST00000292672.7/60680, intron 1 of 12)	3225485	3297016	71532	1	60680	ENST00000334293.10	7359	ENSG00000161082	CELF5	CUGBP Elav-like family member 5
chr19_3392365_3392562	198	Intron (ENST00000641145.1/4782, intron 2 of 10)	3410596	3425147	14552	1	4782	ENST00000588839.1	-18034	ENSG00000141905	NFIC	nuclear factor I C
chr19_4723909_4724260	352	Promoter (<=1kb)	4675224	4723843	48620	2	91039	ENST00000601130.6	-66	ENSG00000142002	DPP9	dipeptidyl peptidase 9
chr19_5308852_5309365	514	Intron (ENST00000588552.5/5802, intron 1 of 30)	5273549	5293252	19704	2	5802	ENST00000591760.5	-15600	ENSG00000105426	PTPRS	protein tyrosine phosphatase receptor type S
chr19_6635695_6635936	242	Distal Intergenic	6590103	6604103	14001	2	970	ENST00000597430.2	-31592	ENSG00000125726	CD70	CD70 molecule
chr19_10049918_10050156	239	Exon (ENST00000497718.6/388503, exon 20 of 39)	10041841	10074135	32295	1	388503	ENST00000495140.1	8077	ENSG00000167798	C3P1	complement component 3 precursor pseudogene
chr19_10113137_10113402	266	Promoter (1-2kb)	10112104	10113834	1731	1	5032	ENST00000471843.1	1033	ENSG00000244165	P2RY11	purinergic receptor P2Y11
chr19_12793446_12794194	749	Promoter (<=1kb)	12774502	12792582	18081	2	29911	ENST00000593143.5	-864	ENSG00000095066	HOOK2	hook microtubule tethering protein 2
chr19_12945777_12946038	262	Promoter (<=1kb)	12945855	12953269	7415	1	5886	ENST00000591499.5	0	ENSG00000179262	RAD23A	RAD23 homolog A, nucleotide excision repair protein
chr19_15459881_15460190	310	Promoter (1-2kb)	15457469	15458117	649	2	64926	ENST00000608577.1	-1764	ENSG00000105122	RASAL3	RAS protein activator like 3
chr19_28312411_28312634	224	Promoter (<=1kb)	28294093	28313500	19408	2	107985269	ENST00000587777.1	866
chr19_28991111_28991421	311	Distal Intergenic	29002319	29011796	9478	1	100505835	ENST00000592653.6	-10898		LINC01532	long intergenic non-protein coding RNA 1532
chr19_32649451_32649672	222	Intron (ENST00000306065.9/84079, intron 3 of 28)	32643063	32643785	723	2	84079	ENST00000593232.5	-5666	ENSG00000105186	ANKRD27	ankyrin repeat domain 27
chr19_32787325_32787644	320	Intron (ENST00000444215.6/91646, intron 11 of 27)	32810214	32829381	19168	1	91646	ENST00000637289.1	-22570	ENSG00000173809	TDRD12	tudor domain containing 12
chr19_33122251_33122459	209	Intron (ENST00000170564.7/55094, intron 17 of 19)	33112939	33130406	17468	1	55094	ENST00000592262.1	9312	ENSG00000076650	GPATCH1	G-patch domain containing 1
chr19_33960269_33960596	328	Distal Intergenic	33997289	34066283	68995	2	105372371	ENST00000657364.1	105687		LOC105372371	uncharacterized LOC105372371
chr19_35124744_35124993	250	Promoter (2-3kb)	35122700	35122764	65	1	102466205	ENST00000622822.1	2044	ENSG00000284065	MIR6887	microRNA 6887
chr19_39409480_39409758	279	Promoter (<=1kb)	39409623	39409678	56	2	100616163	ENST00000581459.1	0	ENSG00000266559	MIR4530	microRNA 4530
chr19_41872428_41872679	252	Promoter (2-3kb)	41869627	41869698	72	1	102465478	ENST00000621706.1	2801	ENSG00000276926	MIR6797	microRNA 6797
chr19_41954472_41954773	302	Promoter (2-3kb)	41956692	41957499	808	2	10567	ENST00000595226.1	2726	ENSG00000105404	RABAC1	Rab acceptor 1
chr19_44539494_44539851	358	Intron (ENST00000446628.5/388550, intron 6 of 7)	44542798	44549166	6369	2	388550	ENST00000455058.1	9315	ENSG00000230666	CEACAM22P	CEA cell adhesion molecule 22, pseudogene
chr19_45279871_45280108	238	Promoter (<=1kb)	45280145	45287664	7520	1	57787	ENST00000590897.1	-37	ENSG00000007047	MARK4	microtubule affinity regulating kinase 4
chr19_48614798_48615208	411	Promoter (<=1kb)	48599961	48615076	15116	2	54854	ENST00000263266.4	0	ENSG00000105523	FAM83E	family with sequence similarity 83 member E
chr19_49222486_49222725	240	Distal Intergenic	49210734	49211834	1101	1	54795	ENST00000597316.1	11752	ENSG00000130529	TRPM4	transient receptor potential cation channel subfamily M member 4
chr19_49647408_49647744	337	Promoter (2-3kb)	49644923	49646619	1697	1	58506	ENST00000595242.3	2485	ENSG00000126461	SCAF1	SR-related CTD associated factor 1
chr19_49855347_49855977	631	Promoter (<=1kb)	49856136	49860740	4605	1	53635	ENST00000597793.5	-159	ENSG00000104960	PTOV1	PTOV1 extended AT-hook containing adaptor protein
chr19_49856722_49856928	207	Promoter (<=1kb)	49857043	49858863	1821	1	53635	ENST00000596424.1	-115	ENSG00000104960	PTOV1	PTOV1 extended AT-hook containing adaptor protein
chr19_55528627_55528834	208	3' UTR	55529733	55536303	6571	2	646643	ENST00000344158.4	7469	ENSG00000187550	SBK2	SH3 domain binding kinase family member 2
chr19_57891910_57892120	211	Promoter (2-3kb)	57868536	57889074	20539	2	730051	ENST00000594629.1	-2836	ENSG00000204514	ZNF814	zinc finger protein 814
chr19_57938396_57938662	267	Promoter (2-3kb)	57921882	57935402	13521	2	147686	ENST00000396147.6	-2994	ENSG00000196724	ZNF418	zinc finger protein 418
chr19_58395577_58396047	471	Promoter (<=1kb)	58395656	58397079	1424	1	646862	ENST00000601382.3	0	ENSG00000269855	RNF225	ring finger protein 225
chr2_2324286_2324499	214	Promoter (<=1kb)	1789137	2324345	535209	2	23040	ENST00000648339.1	0	ENSG00000186487	MYT1L	myelin transcription factor 1 like
chr2_10438629_10439068	440	Distal Intergenic	10446714	10446849	136	2	100302743	ENST00000383906.1	7781	ENSG00000206633	SNORA80B	small nucleolar RNA, H/ACA box 80B
chr2_15781482_15781732	251	Distal Intergenic	15700531	15715631	15101	1	101926966	ENST00000476839.2	80951	ENSG00000231031	LINC01804	long intergenic non-protein coding RNA 1804
chr2_23215082_23215305	224	Distal Intergenic	23030603	23199056	168454	2	107985792	ENST00000440785.1	-16026		LOC107985792	uncharacterized LOC107985792
chr2_25927050_25927387	338	3' UTR	25929419	25951919	22501	2	3797	ENST00000496378.1	24532	ENSG00000084731	KIF3C	kinesin family member 3C
chr2_26862921_26863122	202	Intron (ENST00000450961.5/56896, intron 1 of 3)	26848508	26927356	78849	1	56896	ENST00000434719.1	14413	ENSG00000157851	DPYSL5	dihydropyrimidinase like 5
chr2_29090536_29090839	304	Intron (ENST00000662150.1/105374386, intron 3 of 3)	29088649	29097586	8938	2	105374386	ENST00000662150.1	6747		LOC105374386	uncharacterized LOC105374386
chr2_29755064_29755320	257	Intron (ENST00000389048.8/238, intron 1 of 28)	29192777	29717700	524924	2	238	ENST00000618119.4	-37364	ENSG00000171094	ALK	ALK receptor tyrosine kinase
chr2_31174527_31174756	230	3' UTR	30932117	31155202	223086	2	79623	ENST00000464038.5	-19325	ENSG00000158089	GALNT14	polypeptide N-acetylgalactosaminyltransferase 14
chr2_32839043_32839283	241	Promoter (1-2kb)	32841014	32902123	61110	1	285045	ENST00000424364.6	-1731	ENSG00000230876	LINC00486	long intergenic non-protein coding RNA 486
chr2_38481676_38482011	336	Exon (ENST00000394878.2/ENST00000394878.2, exon 1 of 1)	38457046	38496411	39366	2	101929596	ENST00000661472.1	14400	ENSG00000231367	LINC02613	long intergenic non-protein coding RNA 2613
chr2_42895386_42895637	252	Distal Intergenic	42769887	42792593	22707	2	23498	ENST00000406924.6	-102793	ENSG00000162882	HAAO	3-hydroxyanthranilate 3,4-dioxygenase
chr2_43221052_43221491	440	Exon (ENST00000660392.1/ENST00000660392.1, exon 2 of 2)	43222402	43226606	4205	2	678	ENST00000282388.4	5115	ENSG00000152518	ZFP36L2	ZFP36 ring finger protein like 2
chr2_43221947_43222286	340	Exon (ENST00000660392.1/ENST00000660392.1, exon 2 of 2)	43222402	43226606	4205	2	678	ENST00000282388.4	4320	ENSG00000152518	ZFP36L2	ZFP36 ring finger protein like 2
chr2_43225976_43226572	597	Promoter (<=1kb)	43222402	43226606	4205	2	678	ENST00000282388.4	34	ENSG00000152518	ZFP36L2	ZFP36 ring finger protein like 2
chr2_46237459_46237791	333	Distal Intergenic	46293667	46346998	53332	1	2034	ENST00000460015.1	-55876	ENSG00000116016	EPAS1	endothelial PAS domain protein 1
chr2_59039378_59039597	220	Intron (ENST00000452840.5/400955, intron 10 of 11)	59014354	59277688	263335	1	400955	ENST00000650010.1	25024	ENSG00000233723	LINC01122	long intergenic non-protein coding RNA 1122
chr2_64958103_64958412	310	Intron (ENST00000653778.1/400958, intron 2 of 3)	64904114	64932449	28336	2	400958	ENST00000693405.1	-25654	ENSG00000237638	LINC02245	long intergenic non-protein coding RNA 2245
chr2_69104769_69105118	350	Promoter (1-2kb)	69103682	69103755	74	1	100423030	ENST00000577443.1	1087	ENSG00000266649	MIR3126	microRNA 3126
chr2_74912220_74912417	198	Distal Intergenic	74918148	74932794	14647	1	102724515	ENST00000435984.1	-5731	ENSG00000204792	LINC01291	long intergenic non-protein coding RNA 1291
chr2_76267551_76267755	205	Intron (ENST00000669228.1/ENST00000669228.1, intron 1 of 4)	75662708	75710985	48278	2	6936	ENST00000541687.5	-556566	ENSG00000005436	GCFC2	GC-rich sequence DNA-binding factor 2
chr2_79083192_79083498	307	Distal Intergenic	79085030	79086847	1818	2	5968	ENST00000454188.5	3349	ENSG00000172023	REG1B	regenerating family member 1 beta
chr2_88823445_88823683	239	Promoter (1-2kb)	88811186	88825207	14022	2	105374855	ENST00000434790.2	1524		MALLP2	MALL pseudogene 2
chr2_99011037_99011380	344	Intron (ENST00000393483.8/80705, intron 20 of 20)	99018200	99078928	60729	2	80705	ENST00000489546.5	67548	ENSG00000135951	TSGA10	testis specific 10
chr2_100392726_100393102	377	3' UTR	100397936	100415845	17910	2	9486	ENST00000420858.5	22743	ENSG00000115526	CHST10	carbohydrate sulfotransferase 10
chr2_105236928_105237155	228	Distal Intergenic	105241743	105243467	1725	1	11250	ENST00000258456.3	-4588	ENSG00000135973	GPR45	G protein-coupled receptor 45
chr2_106671174_106671435	262	Distal Intergenic	106543014	106544297	1284	1	927	ENST00000451464.1	128160	ENSG00000254126	CD8B2	CD8b2 molecule
chr2_109302460_109302699	240	Intron (ENST00000309415.8/344558, intron 1 of 9)	109313571	109313625	55	2	100423027	ENST00000583300.1	10926	ENSG00000265965	MIR4266	microRNA 4266
chr2_113005621_113005919	299	Promoter (<=1kb)	113005459	113008044	2586	1	27179	ENST00000259211.7	162	ENSG00000136694	IL36A	interleukin 36 alpha
chr2_121069059_121069262	204	Distal Intergenic	121224164	121234274	10111	2	29842	ENST00000464621.1	165012	ENSG00000115112	TFCP2L1	transcription factor CP2 like 1
chr2_121530748_121531369	622	Promoter (<=1kb)	121530881	121531007	127	1	100151683	ENST00000580972.1	0	ENSG00000264229	RNU4ATAC	RNA, U4atac small nuclear
chr2_121992049_121992276	228	Intron (ENST00000657880.1/105373595, intron 2 of 8)	121902501	122887691	985191	1	105373595	ENST00000657880.1	89548		LOC105373595	uncharacterized LOC105373595
chr2_127463643_127463975	333	Exon (ENST00000596439.5/ENST00000596439.5, exon 1 of 6)	127436207	127486618	50412	2	105373608	ENST00000412979.1	22643		LOC105373608	uncharacterized LOC105373608
chr2_130336936_130337383	448	Distal Intergenic	130338247	130342135	3889	2	84317	ENST00000465315.1	4752	ENSG00000136710	CCDC115	coiled-coil domain containing 115
chr2_136288044_136288323	280	Distal Intergenic	136114349	136119177	4829	2	7852	ENST00000696228.1	-168867	ENSG00000121966	CXCR4	C-X-C motif chemokine receptor 4
chr2_152101400_152101611	212	Promoter (2-3kb)	151832885	152099167	266283	2	785	ENST00000637309.1	-2233	ENSG00000182389	CACNB4	calcium voltage-gated channel auxiliary subunit beta 4
chr2_154291607_154291819	213	Intron (ENST00000392825.8/114805, intron 8 of 12)	154301579	154450730	149152	1	114805	ENST00000450838.5	-9760	ENSG00000144278	GALNT13	polypeptide N-acetylgalactosaminyltransferase 13
chr2_156400661_156401233	573	Distal Intergenic	156435290	156510849	75560	1	2820	ENST00000415049.5	-34057	ENSG00000115159	GPD2	glycerol-3-phosphate dehydrogenase 2
chr2_162937947_162938180	234	Distal Intergenic	162371407	162838767	467361	2	90134	ENST00000332142.10	-99180	ENSG00000184611	KCNH7	potassium voltage-gated channel subfamily H member 7
chr2_176787058_176787284	227	Intron (ENST00000702503.1/102724224, intron 3 of 4)	176753401	176766398	12998	2	101929963	ENST00000652997.1	-20660		LOC101929963	uncharacterized LOC101929963
chr2_194896885_194897088	204	Distal Intergenic	194730595	194761435	30841	1	101927431	ENST00000447194.1	166290	ENSG00000230173	LINC01790	long intergenic non-protein coding RNA 1790
chr2_196803637_196803908	272	Distal Intergenic	196792955	196799725	6771	2	9330	ENST00000448539.1	-3912	ENSG00000119041	GTF3C3	general transcription factor IIIC subunit 3
chr2_203603169_203603391	223	Distal Intergenic	203490046	203535335	45290	2	65059	ENST00000420371.2	-67834	ENSG00000173166	RAPH1	Ras association (RalGDS/AF-6) and pleckstrin homology domains 1
chr2_207166781_207167166	386	Promoter (<=1kb)	207080361	207166847	86487	2	8609	ENST00000423015.5	0	ENSG00000118263	KLF7	KLF transcription factor 7
chr2_215357208_215357419	212	Distal Intergenic	215360866	215363640	2775	2	2335	ENST00000498719.1	6221	ENSG00000115414	FN1	fibronectin 1
chr2_218406361_218406653	293	Distal Intergenic	218402646	218402722	77	1	407017	ENST00000362251.4	3715	ENSG00000199121	MIR26B	microRNA 26b
chr2_221955961_221956198	238	Distal Intergenic	222202137	222221410	19274	2	5077	ENST00000555548.1	265212	ENSG00000135903	PAX3	paired box 3
chr2_230837509_230837742	234	Distal Intergenic	230813983	230818182	4200	1	51719	ENST00000493540.1	23526	ENSG00000135932	CAB39	calcium binding protein 39
chr2_231423261_231423461	201	Distal Intergenic	231397176	231398257	1082	1	93010	ENST00000479618.1	26085	ENSG00000156966	B3GNT7	UDP-GlcNAc:betaGal beta-1,3-N-acetylglucosaminyltransferase 7
chr2_235459893_235460177	285	Distal Intergenic	235494043	236131793	637751	1	116987	ENST00000304032.13	-33866	ENSG00000157985	AGAP1	ArfGAP with GTPase domain, ankyrin repeat and PH domain 1
chr2_235582340_235582547	208	Intron (ENST00000304032.13/116987, intron 1 of 17)	235524324	235744811	220488	1	116987	ENST00000402604.6	58016	ENSG00000157985	AGAP1	ArfGAP with GTPase domain, ankyrin repeat and PH domain 1
chr2_236051638_236052044	407	Intron (ENST00000304032.13/116987, intron 16 of 17)	236045937	236125482	79546	1	116987	ENST00000453371.2	5701	ENSG00000157985	AGAP1	ArfGAP with GTPase domain, ankyrin repeat and PH domain 1
chr20_1770620_1770856	237	Intron (ENST00000671643.1/107984104, intron 1 of 2)	1773365	1779746	6382	2	100289473	ENST00000458670.1	8890	ENSG00000232528	LOC100289473	cytoskeleton associated protein 2-like pseudogene
chr20_1778511_1778733	223	Promoter (1-2kb)	1773365	1779746	6382	2	100289473	ENST00000458670.1	1013	ENSG00000232528	LOC100289473	cytoskeleton associated protein 2-like pseudogene
chr20_3305720_3305935	216	Intron (ENST00000252032.10/25943, intron 20 of 36)	3295494	3316090	20597	2	25943	ENST00000619760.1	10155	ENSG00000088854	DNAAF9	dynein axonemal assembly factor 9
chr20_3773027_3773228	202	Distal Intergenic	3753508	3767781	14274	2	54976	ENST00000399672.5	-5246	ENSG00000101220	C20orf27	chromosome 20 open reading frame 27
chr20_21462605_21462818	214	Distal Intergenic	21511017	21514064	3048	2	4821	ENST00000377142.5	51246	ENSG00000125820	NKX2-2	NK2 homeobox 2
chr20_34568725_34568946	222	Intron (ENST00000217446.8/128869, intron 11 of 11)	34558775	34560345	1571	1	84557	ENST00000476428.1	9950	ENSG00000101460	MAP1LC3A	microtubule associated protein 1 light chain 3 alpha
chr20_36211063_36211386	324	Promoter (2-3kb)	36214373	36229845	15473	1	2036	ENST00000432603.1	-2987	ENSG00000088367	EPB41L1	erythrocyte membrane protein band 4.1 like 1
chr20_37658380_37658696	317	Distal Intergenic	37676889	37682207	5319	1	100287792	ENST00000655861.1	-18193	ENSG00000204117	LOC100287792	uncharacterized LOC100287792
chr20_38355513_38355746	234	Intron (ENST00000217407.3/3929, intron 5 of 14)	38346482	38377013	30532	1	3929	ENST00000217407.3	9031	ENSG00000129988	LBP	lipopolysaccharide binding protein
chr20_42577804_42578019	216	Intron (ENST00000356100.6/11122, intron 7 of 30)	42072774	42472569	399796	2	11122	ENST00000612229.4	-105235	ENSG00000196090	PTPRT	protein tyrosine phosphatase receptor type T
chr20_47006066_47006267	202	Intron (ENST00000357410.7/2139, intron 4 of 13)	47001460	47143149	141690	1	2139	ENST00000458636.2	4606	ENSG00000064655	EYA2	EYA transcriptional coactivator and phosphatase 2
chr20_49513173_49513400	228	Exon (ENST00000244043.5/5740, exon 8 of 10)	49371968	49484297	112330	2	3745	ENST00000635465.1	-28876	ENSG00000158445	KCNB1	potassium voltage-gated channel subfamily B member 1
chr20_50064473_50064722	250	Distal Intergenic	50040716	50041504	789	2	100887755	ENST00000431460.1	-22969		TRERNA1	translation regulatory long non-coding RNA 1
chr20_52253687_52253960	274	Intron (ENST00000656056.1/105372666, intron 2 of 3)	52234807	52452563	217757	1	105372666	ENST00000665325.1	18880		LOC105372666	uncharacterized LOC105372666
chr21_8988008_8988218	211	Promoter (1-2kb)	8986999	8987178	180	1	103504731	ENST00000581792.1	1009	ENSG00000264462	MIR3648-2	microRNA 3648-2
chr21_10331325_10331574	250	Exon (ENST00000613970.1/ENST00000613970.1, exon 1 of 1)	10413477	10452529	39053	1	85319	ENST00000474011.5	-81903		BAGE2	BAGE family member 2, pseudogene
chr21_16694715_16694948	234	Distal Intergenic	16627499	16645467	17969	1	388815	ENST00000660794.1	67216	ENSG00000215386	MIR99AHG	mir-99a-let-7c cluster host gene
chr21_17454670_17454960	291	Distal Intergenic	17441781	17448908	7128	1	100505929	ENST00000613691.1	12889		LINC01549	long intergenic non-protein coding RNA 1549
chr21_26835107_26835379	273	Distal Intergenic	26838093	26840489	2397	2	9510	ENST00000492656.1	5110	ENSG00000154734	ADAMTS1	ADAM metallopeptidase with thrombospondin type 1 motif 1
chr21_36309693_36309918	226	Distal Intergenic	36320189	36339527	19339	1	23515	ENST00000492336.5	-10271	ENSG00000159256	MORC3	MORC family CW-type zinc finger 3
chr21_36395075_36395279	205	Intron (ENST00000314103.6/8208, intron 5 of 13)	36399502	36412962	13461	1	8208	ENST00000481458.1	-4223	ENSG00000159259	CHAF1B	chromatin assembly factor 1 subunit B
chr21_39277712_39278020	309	Promoter (2-3kb)	39278497	39280207	1711	2	54014	ENST00000496759.1	2187	ENSG00000185658	BRWD1	bromodomain and WD repeat domain containing 1
chr21_40921260_40921473	214	Distal Intergenic	40010999	40847158	836160	2	1826	ENST00000400454.6	-74102	ENSG00000171587	DSCAM	DS cell adhesion molecule
chr21_42296384_42296681	298	3' UTR	42285934	42295352	9419	1	9619	ENST00000496783.1	10450	ENSG00000160179	ABCG1	ATP binding cassette subfamily G member 1
chr21_42452471_42452712	242	Distal Intergenic	42496008	42498203	2196	1	101930094	ENST00000454800.1	-43296	ENSG00000239930	RSPH1-DT	RSPH1 divergent transcript
chr21_45074047_45075593	1547	Promoter (<=1kb)	45074569	45146295	71727	1	104	ENST00000460734.5	0	ENSG00000197381	ADARB1	adenosine deaminase RNA specific B1
chr21_45837274_45837726	453	Promoter (<=1kb)	45827961	45837987	10027	2	100129027	ENST00000380008.2	261		PCBP3-AS1	PCBP3 antisense RNA 1
chr22_11621617_11621843	227	Distal Intergenic	11827523	11910358	82836	1	107984037	ENST00000657566.1	-205680		LOC107984037	uncharacterized LOC107984037
chr22_19089337_19089559	223	Exon (ENST00000545799.5/9993, exon 2 of 11)	19056994	19065904	8911	2	9993	ENST00000473832.1	-23433	ENSG00000070413	DGCR2	DiGeorge syndrome critical region gene 2
chr22_22901794_22902049	256	Distal Intergenic	22887829	22895825	7997	1	100423062	ENST00000531372.1	13965	ENSG00000254709	IGLL5	immunoglobulin lambda like polypeptide 5
chr22_28585459_28585662	204	Intron (ENST00000397906.7/23331, intron 2 of 22)	28629428	28679812	50385	2	23331	ENST00000468807.1	94150	ENSG00000100154	TTC28	tetratricopeptide repeat domain 28
chr22_29169738_29169946	209	Distal Intergenic	29142030	29154769	12740	1	83999	ENST00000479755.1	27708	ENSG00000183762	KREMEN1	kringle containing transmembrane protein 1
chr22_30881563_30881772	210	Promoter (<=1kb)	30881681	30889617	7937	1	23762	ENST00000454145.5	0	ENSG00000184792	OSBP2	oxysterol binding protein 2
chr22_31104711_31105120	410	Promoter (<=1kb)	31105013	31105764	752	2	140606	ENST00000495533.1	644	ENSG00000198832	SELENOM	selenoprotein M
chr22_31730328_31730556	229	Intron (ENST00000327423.11/253143, intron 2 of 8)	31685042	31713845	28804	2	253143	ENST00000431684.1	-16483	ENSG00000183530	PRR14L	proline rich 14 like
chr22_33869143_33869525	383	Intron (ENST00000397394.8/9215, intron 1 of 14)	33381919	33873387	491469	2	9215	ENST00000423375.2	3862	ENSG00000133424	LARGE1	LARGE xylosyl- and glucuronyltransferase 1
chr22_37466064_37466428	365	Distal Intergenic	37469068	37472724	3657	2	4242	ENST00000489515.1	6296	ENSG00000100060	MFNG	MFNG O-fucosylpeptide 3-beta-N-acetylglucosaminyltransferase
chr22_38307658_38307856	199	Intron (ENST00000396832.6/1454, intron 2 of 10)	38298029	38303009	4981	2	1454	ENST00000451964.5	-4649	ENSG00000213923	CSNK1E	casein kinase 1 epsilon
chr22_41526318_41527068	751	Promoter (2-3kb)	41523354	41529267	5914	1	50	ENST00000676883.1	2964	ENSG00000100412	ACO2	aconitase 2
chr22_42662141_42662442	302	Promoter (<=1kb)	42618813	42662957	44145	2	1727	ENST00000692152.1	515	ENSG00000100243	CYB5R3	cytochrome b5 reductase 3
chr3_9383599_9383801	203	Promoter (<=1kb)	9383180	9384870	1691	1	25917	ENST00000464045.1	419	ENSG00000134077	THUMPD3	THUMP domain containing 3
chr3_9631912_9632172	261	Distal Intergenic	9649433	9702393	52961	1	64419	ENST00000353332.9	-17261	ENSG00000163719	MTMR14	myotubularin related protein 14
chr3_10517669_10517875	207	Intron (ENST00000460129.5/491, intron 1 of 21)	10324023	10505586	181564	2	491	ENST00000360273.7	-12083	ENSG00000157087	ATP2B2	ATPase plasma membrane Ca2+ transporting 2
chr3_11087229_11087455	227	Intron (ENST00000657204.1/101927467, intron 2 of 2)	11071852	11078180	6329	1	101927467	ENST00000667007.1	15377		LOC101927467	uncharacterized LOC101927467
chr3_13689650_13689871	222	Intron (ENST00000438915.1/285375, intron 1 of 1)	13650733	13746638	95906	1	285375	ENST00000665476.1	38917	ENSG00000224514	LINC00620	long intergenic non-protein coding RNA 620
chr3_13699051_13699257	207	Intron (ENST00000438915.1/285375, intron 1 of 1)	13650733	13746638	95906	1	285375	ENST00000665476.1	48318	ENSG00000224514	LINC00620	long intergenic non-protein coding RNA 620
chr3_14419455_14419766	312	Intron (ENST00000610642.4/6533, intron 2 of 10)	14432670	14445816	13147	1	6533	ENST00000452775.1	-12904	ENSG00000131389	SLC6A6	solute carrier family 6 member 6
chr3_32621639_32621865	227	Exon (ENST00000447449.1/ENST00000447449.1, exon 1 of 1)	32545874	32570858	24985	2	51143	ENST00000474077.1	-50781	ENSG00000144635	DYNC1LI1	dynein cytoplasmic 1 light intermediate chain 1
chr3_38328819_38329108	290	Exon (ENST00000427139.1/ENST00000427139.1, exon 1 of 4)	38346760	38357158	10399	1	9942	ENST00000427323.5	-17652	ENSG00000093217	XYLB	xylulokinase
chr3_43906414_43906628	215	Distal Intergenic	43717671	43734371	16701	1	51099	ENST00000463153.2	188743	ENSG00000011198	ABHD5	abhydrolase domain containing 5, lysophosphatidic acid acyltransferase
chr3_45688863_45689146	284	Promoter (<=1kb)	45689056	45709648	20593	1	22908	ENST00000464524.5	0	ENSG00000211456	SACM1L	SAC1 like phosphatidylinositide phosphatase
chr3_47848093_47848310	218	Promoter (<=1kb)	47847777	47848996	1220	1	22907	ENST00000474183.1	316	ENSG00000132153	DHX30	DExH-box helicase 30
chr3_49533062_49533315	254	3' UTR	49549359	49554305	4947	2	100132677	ENST00000665395.1	20990	ENSG00000226913	BSN-DT	BSN divergent transcript
chr3_49719368_49719844	477	Promoter (<=1kb)	49716829	49719684	2856	2	386724	ENST00000320431.8	0	ENSG00000176020	AMIGO3	adhesion molecule with Ig like domain 3
chr3_52053899_52054795	897	Promoter (1-2kb)	52051632	52056165	4534	2	1849	ENST00000469623.1	1370	ENSG00000164086	DUSP7	dual specificity phosphatase 7
chr3_52055906_52056218	313	Promoter (<=1kb)	52051632	52056165	4534	2	1849	ENST00000469623.1	0	ENSG00000164086	DUSP7	dual specificity phosphatase 7
chr3_69554740_69554944	205	Distal Intergenic	69287751	69542583	254833	2	23150	ENST00000459638.5	-12157	ENSG00000114541	FRMD4B	FERM domain containing 4B
chr3_82139330_82139563	234	Intron (ENST00000470263.5/105377180, intron 1 of 8)	82031985	82416593	384609	1	105377180	ENST00000666096.1	107345	ENSG00000239440	LINC02008	long intergenic non-protein coding RNA 2008
chr3_85229245_85229512	268	Intron (ENST00000383699.8/253559, intron 1 of 9)	85385710	85385792	83	1	100847077	ENST00000580619.1	-156198	ENSG00000264084	MIR5688	microRNA 5688
chr3_86424620_86424867	248	Distal Intergenic	86481943	86496996	15054	1	101927494	ENST00000460586.1	-57076	ENSG00000241328	LINC02070	long intergenic non-protein coding RNA 2070
chr3_89811887_89812197	311	Distal Intergenic	89107676	89479659	371984	1	2042	ENST00000494014.1	704211	ENSG00000044524	EPHA3	EPH receptor A3
chr3_113452731_113452929	199	Intron (ENST00000649772.1/55779, intron 14 of 38)	113362865	113441610	78746	2	55779	ENST00000295868.6	-11121	ENSG00000206530	CFAP44	cilia and flagella associated protein 44
chr3_118040565_118040890	326	Intron (ENST00000482142.5/105374060, intron 6 of 6)	117672154	117997592	325439	2	107986022	ENST00000484092.1	-42973
chr3_120095357_120095824	468	Promoter (<=1kb)	120095630	120100425	4796	1	107986119	ENST00000485898.2	0		GSK3B-DT	GSK3B divergent transcript
chr3_128834981_128835181	201	Distal Intergenic	128861546	128865604	4059	2	653712	ENST00000480931.1	30423		LOC653712	intraflagellar transport 122 homolog (Chlamydomonas) pseudogene
chr3_139283488_139283766	279	Promoter (<=1kb)	139282590	139360301	77712	1	56945	ENST00000684961.1	898	ENSG00000175110	MRPS22	mitochondrial ribosomal protein S22
chr3_179759008_179759309	302	Promoter (<=1kb)	179759943	179761255	1313	1	8975	ENST00000681724.1	-634	ENSG00000058056	USP13	ubiquitin specific peptidase 13
chr3_188283975_188284189	215	Intron (ENST00000448637.5/4026, intron 1 of 6)	188239864	188406291	166428	1	4026	ENST00000457242.1	44111	ENSG00000145012	LPP	LIM domain containing preferred translocation partner in lipoma
chr3_197844510_197844898	389	Promoter (2-3kb)	197847845	197870176	22332	1	84859	ENST00000461674.5	-2947	ENSG00000186001	LRCH3	leucine rich repeats and calponin homology domain containing 3
chr4_2942415_2942640	226	Promoter (<=1kb)	2937933	2941716	3784	2	8602	ENST00000507120.1	-699	ENSG00000087269	NOP14	NOP14 nucleolar protein
chr4_3670394_3671008	615	Distal Intergenic	3673593	3677855	4263	2	100133461	ENST00000508619.1	6847	ENSG00000250632	LINC02171	long intergenic non-protein coding RNA 2171
chr4_5279685_5279939	255	Intron (ENST00000282908.10/55351, intron 3 of 11)	5214242	5468070	253829	1	55351	ENST00000505508.5	65443	ENSG00000152953	STK32B	serine/threonine kinase 32B
chr4_6072832_6073069	238	Promoter (2-3kb)	6026203	6070195	43993	2	152789	ENST00000637373.2	-2637	ENSG00000152969	JAKMIP1	janus kinase and microtubule interacting protein 1
chr4_6432094_6432301	208	Intron (ENST00000382599.9/5522, intron 1 of 8)	6323046	6421118	98073	2	5522	ENST00000515571.5	-10976	ENSG00000074211	PPP2R2C	protein phosphatase 2 regulatory subunit Bgamma
chr4_6533547_6533756	210	Intron (ENST00000506140.5/5522, intron 2 of 9)	6347926	6523547	175622	2	5522	ENST00000314348.12	-10000	ENSG00000074211	PPP2R2C	protein phosphatase 2 regulatory subunit Bgamma
chr4_8344357_8344557	201	Distal Intergenic	8320175	8326685	6511	1	105374374	ENST00000701442.1	24182	ENSG00000249145	LINC02517	long intergenic non-protein coding RNA 2517
chr4_11897785_11898001	217	Distal Intergenic	11914667	11919688	5022	1	107986179	ENST00000514103.1	-16666		LOC107986179	uncharacterized LOC107986179
chr4_15310770_15311039	270	Intron (ENST00000502344.5/101929095, intron 1 of 5)	15339818	15442362	102545	1	114905	ENST00000397700.6	-28779	ENSG00000163145	C1QTNF7	C1q and TNF related 7
chr4_25097035_25097234	200	Distal Intergenic	25120083	25126260	6178	2	51091	ENST00000681374.1	29026	ENSG00000109618	SEPSECS	Sep (O-phosphoserine) tRNA:Sec (selenocysteine) tRNA synthase
chr4_49513360_49513765	406	Distal Intergenic	49028692	49031276	2585	1	80157	ENST00000507372.1	484668	ENSG00000109182	CWH43	cell wall biogenesis 43 C-terminal homolog
chr4_59238001_59238284	284	Distal Intergenic	59013573	59046959	33387	1	105377247	ENST00000509782.1	224428	ENSG00000251266	LINC02429	long intergenic non-protein coding RNA 2429
chr4_64156773_64156979	207	Distal Intergenic	64280075	64281536	1462	2	253017	ENST00000511997.1	124557	ENSG00000205678	TECRL	trans-2,3-enoyl-CoA reductase like
chr4_84756237_84756456	220	Promoter (<=1kb)	84751248	84755399	4152	2	23001	ENST00000509825.1	-838	ENSG00000163625	WDFY3	WD repeat and FYVE domain containing 3
chr4_116259149_116259393	245	Intron (ENST00000508414.5/105377383, intron 1 of 2)	116096291	116297157	200867	2	105377383	ENST00000509983.1	37764		LOC105377383	uncharacterized LOC105377383
chr4_128743956_128744188	233	Distal Intergenic	128809700	128875224	65525	1	79960	ENST00000226319.11	-65512	ENSG00000077684	JADE1	jade family PHD finger 1
chr4_132344006_132344326	321	Promoter (1-2kb)	131978485	132345621	367137	2	105377428	ENST00000652009.1	1295		LOC105377428	uncharacterized LOC105377428
chr4_136804926_136805138	213	Intron (ENST00000656956.1/105377441, intron 4 of 4)	136809069	136921382	112314	2	105377441	ENST00000512039.1	116244	ENSG00000248869	LINC02511	long intergenic non-protein coding RNA 2511
chr4_139511793_139512002	210	Exon (ENST00000274031.8/80854, exon 8 of 8)	139496089	139520396	24308	2	80854	ENST00000515101.1	8394	ENSG00000145391	SETD7	SET domain containing 7, histone lysine methyltransferase
chr4_149064642_149065050	409	Distal Intergenic	149147793	149154175	6383	2	107986319	ENST00000668418.1	89125	ENSG00000250252	LINC02430	long intergenic non-protein coding RNA 2430
chr4_153943200_153943398	199	Distal Intergenic	153948718	154300500	351783	1	101927947	ENST00000660197.1	-5320		LOC101927947	uncharacterized LOC101927947
chr4_164578100_164578381	282	Distal Intergenic	164754064	164801454	47391	1	100505989	ENST00000515485.5	-175683	ENSG00000248771	SMIM31	small integral membrane protein 31
chr4_168046619_168046823	205	Intron (ENST00000506926.1/ENST00000506926.1, intron 1 of 3)	168092537	168187736	95200	1	11199	ENST00000359299.8	-45714	ENSG00000109511	ANXA10	annexin A10
chr4_168931467_168931670	204	Intron (ENST00000510042.5/84869, intron 3 of 5)	168921575	168925393	3819	1	23022	ENST00000503290.1	9892	ENSG00000129116	PALLD	palladin, cytoskeletal associated protein
chr4_173070884_173071137	254	Distal Intergenic	173144624	173166159	21536	2	101930370	ENST00000659700.1	95022	ENSG00000245213	GALNT7-DT	GALNT7 divergent transcript
chr4_182880907_182881117	211	Distal Intergenic	182911223	182915560	4338	2	1635	ENST00000513383.5	34443	ENSG00000129187	DCTD	dCMP deaminase
chr4_184277397_184277601	205	Distal Intergenic	184116863	184221230	104368	2	133121	ENST00000512353.1	-56167	ENSG00000164303	ENPP6	ectonucleotide pyrophosphatase/phosphodiesterase 6
chr4_188146747_188147011	265	Exon (ENST00000332517.4/339976, exon 6 of 6)	188143663	188147306	3644	1	339976	ENST00000512233.1	3084	ENSG00000184108	TRIML1	tripartite motif family like 1
chr5_5184233_5184438	206	Intron (ENST00000511368.5/170690, intron 4 of 10)	5140468	5303807	163340	1	170690	ENST00000433402.2	43765	ENSG00000145536	ADAMTS16	ADAM metallopeptidase with thrombospondin type 1 motif 16
chr5_6741007_6741309	303	Intron (ENST00000230859.8/11044, intron 4 of 12)	6745915	6749657	3743	1	11044	ENST00000511764.5	-4606	ENSG00000112941	TENT4A	terminal nucleotidyltransferase 4A
chr5_7140762_7140988	227	Intron (ENST00000648809.1/107986402, intron 3 of 5)	7272792	7276923	4132	1	105374643	ENST00000649201.1	-131804		LOC105374643	uncharacterized LOC105374643
chr5_44679127_44679409	283	Distal Intergenic	44495099	44658569	163471	2	102723839	ENST00000671607.1	-20558		LINC02224	long intergenic non-protein coding RNA 2224
chr5_53480610_53480945	336	Promoter (<=1kb)	53480626	53487106	6481	1	10468	ENST00000396947.7	0	ENSG00000134363	FST	follistatin
chr5_57549926_57550506	581	Distal Intergenic	57574027	57617431	43405	1	100996645	ENST00000664455.1	-23521	ENSG00000249436	LNCBRM	lncRNA SMARCA2 (BRM) associated
chr5_85907946_85908174	229	Distal Intergenic	86282460	86296463	14004	1	285622	ENST00000590707.5	-374286		NBPF22P	NBPF member 22, pseudogene
chr5_92901492_92901700	209	Distal Intergenic	92907180	92939591	32412	2	107984117	ENST00000507491.1	37891		LINC02058	long intergenic non-protein coding RNA 2058
chr5_105744329_105744606	278	Distal Intergenic	104484204	105392970	908767	2	105379110	ENST00000503650.1	-351359		LOC105379110	uncharacterized LOC105379110
chr5_108086747_108087023	277	Intron (ENST00000542267.7/64839, intron 6 of 8)	108020799	108364767	343969	2	64839	ENST00000481160.1	277744	ENSG00000145743	FBXL17	F-box and leucine rich repeat protein 17
chr5_113455085_113455300	216	Intron (ENST00000408903.7/4163, intron 1 of 18)	113432553	113434989	2437	2	83942	ENST00000390666.4	-20096	ENSG00000212122	TSSK1B	testis specific serine kinase 1B
chr5_128896206_128896439	234	Intron (ENST00000508645.5/28965, intron 3 of 6)	128965488	129033635	68148	1	28965	ENST00000262462.9	-69049	ENSG00000113396	SLC27A6	solute carrier family 27 member 6
chr5_136080501_136080744	244	Promoter (<=1kb)	136080470	136080597	128	2	100126299	ENST00000602301.2	0	ENSG00000278815	VTRNA2-1	vault RNA 2-1
chr5_137709317_137709616	300	Promoter (2-3kb)	137617500	137706436	88937	2	26249	ENST00000506491.5	-2881	ENSG00000146021	KLHL3	kelch like family member 3
chr5_140388701_140388955	255	Intron (ENST00000507521.2/ENST00000507521.2, intron 1 of 1)	140401814	140472476	70663	1	54882	ENST00000616482.4	-12859	ENSG00000131503	ANKHD1	ankyrin repeat and KH domain containing 1
chr5_140718987_140719327	341	Promoter (<=1kb)	140718925	140719013	89	1	56663	ENST00000365241.1	62	ENSG00000202111	VTRNA1-2	vault RNA 1-2
chr5_150111357_150111647	291	Promoter (1-2kb)	150053291	150113372	60082	2	1436	ENST00000286301.7	1725	ENSG00000182578	CSF1R	colony stimulating factor 1 receptor
chr5_160278661_160279089	429	Intron (ENST00000257536.13/79616, intron 3 of 5)	160254301	160312476	58176	2	79616	ENST00000519673.1	33387	ENSG00000135083	CCNJL	cyclin J like
chr5_173766794_173767072	279	Intron (ENST00000671054.1/ENST00000671054.1, intron 1 of 1)	173708091	173746279	38189	2	107984118	ENST00000664033.1	-20515		LOC107984118	uncharacterized LOC107984118
chr5_176389071_176389342	272	Promoter (<=1kb)	176383981	176388927	4947	2	51491	ENST00000618911.4	-144	ENSG00000048162	NOP16	NOP16 nucleolar protein
chr5_177443589_177443871	283	Promoter (<=1kb)	177443067	177444477	1411	2	340037	ENST00000511565.1	606		PRR7-AS1	PRR7 antisense RNA 1
chr5_178315189_178315392	204	Intron (ENST00000679896.1/91522, intron 2 of 27)	178263208	178265834	2627	2	91522	ENST00000646779.1	-49355	ENSG00000050767	COL23A1	collagen type XXIII alpha 1 chain
chr5_178337052_178337249	198	Intron (ENST00000679896.1/91522, intron 2 of 27)	178263208	178265834	2627	2	91522	ENST00000646779.1	-71218	ENSG00000050767	COL23A1	collagen type XXIII alpha 1 chain
chr5_181154956_181155212	257	Exon (ENST00000641492.1/285659, exon 2 of 2)	181147638	181159285	11648	1	285659	ENST00000641791.1	7318	ENSG00000182613	OR2V2	olfactory receptor family 2 subfamily V member 2
chr5_181173483_181174213	731	Distal Intergenic	181191046	181191852	807	2	102577426	ENST00000513771.1	17639	ENSG00000248473	LINC01962	long intergenic non-protein coding RNA 1962
chr5_181191560_181191823	264	Promoter (<=1kb)	181191046	181191852	807	2	102577426	ENST00000513771.1	29	ENSG00000248473	LINC01962	long intergenic non-protein coding RNA 1962
chr5_181207678_181207886	209	Promoter (2-3kb)	181203118	181205293	2176	2	81786	ENST00000334421.5	-2385	ENSG00000146054	TRIM7	tripartite motif containing 7
chr5_181221744_181222567	824	Promoter (<=1kb)	181222499	181234326	11828	1	90933	ENST00000515499.5	0	ENSG00000146063	TRIM41	tripartite motif containing 41
chr6_327383_327701	319	Promoter (2-3kb)	325167	351353	26187	1	56940	ENST00000604971.5	2216	ENSG00000112679	DUSP22	dual specificity phosphatase 22
chr6_351192_351391	200	3' UTR	338006	350928	12923	1	56940	ENST00000604988.1	13186	ENSG00000112679	DUSP22	dual specificity phosphatase 22
chr6_5706105_5706490	386	Intron (ENST00000324331.10/10667, intron 6 of 6)	5664985	5695272	30288	2	101927950	ENST00000602500.1	-10833	ENSG00000270174	LOC101927950	uncharacterized LOC101927950
chr6_11246228_11246427	200	Intron (ENST00000500636.2/ENST00000500636.2, intron 3 of 4)	11183301	11232682	49382	2	4739	ENST00000620854.4	-13546	ENSG00000111859	NEDD9	neural precursor cell expressed, developmentally down-regulated 9
chr6_11990021_11990264	244	Distal Intergenic	11990338	12001286	10949	2	101928253	ENST00000456036.2	11022	ENSG00000225102	LOC101928253	uncharacterized LOC101928253
chr6_14737318_14737609	292	Intron (ENST00000689305.1/ENST00000689305.1, intron 2 of 2)	14616040	14656819	40780	2	101928354	ENST00000702111.1	-80499		LOC101928354	uncharacterized LOC101928354
chr6_25726176_25726592	417	Promoter (<=1kb)	25726063	25726562	500	2	221613	ENST00000297012.5	0	ENSG00000164508	H2AC1	H2A clustered histone 1
chr6_26521058_26521279	222	Promoter (<=1kb)	26521709	26527404	5696	1	493812	ENST00000411553.3	-430	ENSG00000228223	HCG11	HLA complex group 11
chr6_26554059_26554285	227	Distal Intergenic	26569324	26574698	5375	1	105374988	ENST00000641660.1	-15039	ENSG00000284607	LOC105374988	uncharacterized LOC105374988
chr6_27007103_27007387	285	Intron (ENST00000669756.1/100133205, intron 2 of 2)	27019899	27023943	4045	1	100133205	ENST00000668297.1	-12512	ENSG00000224843	LINC00240	long intergenic non-protein coding RNA 240
chr6_27157977_27158345	369	Distal Intergenic	27147626	27147688	63	1	100422934	ENST00000584253.1	10351	ENSG00000265565	MIR3143	microRNA 3143
chr6_27177146_27177536	391	Distal Intergenic	27147626	27147688	63	1	100422934	ENST00000584253.1	29520	ENSG00000265565	MIR3143	microRNA 3143
chr6_27230419_27230741	323	Distal Intergenic	27247701	27255868	8168	1	10279	ENST00000454665.6	-16960	ENSG00000112812	PRSS16	serine protease 16
chr6_27259641_27259915	275	Distal Intergenic	27252986	27256624	3639	1	10279	ENST00000485603.1	6655	ENSG00000112812	PRSS16	serine protease 16
chr6_27545564_27545853	290	Distal Intergenic	27473194	27494436	21243	1	105375001	ENST00000663193.1	72370		LOC105375001	uncharacterized LOC105375001
chr6_27614302_27614517	216	Distal Intergenic	27694026	27713286	19261	1	100507173	ENST00000685096.2	-79509	ENSG00000281706	LINC01012	long intergenic non-protein coding RNA 1012
chr6_27668485_27668797	313	Distal Intergenic	27694026	27713286	19261	1	100507173	ENST00000685096.2	-25229	ENSG00000281706	LINC01012	long intergenic non-protein coding RNA 1012
chr6_27672152_27672544	393	Distal Intergenic	27694026	27713286	19261	1	100507173	ENST00000685096.2	-21482	ENSG00000281706	LINC01012	long intergenic non-protein coding RNA 1012
chr6_27791300_27791567	268	Distal Intergenic	27807479	27807929	451	2	8340	ENST00000377401.4	16362	ENSG00000185130	H2BC13	H2B clustered histone 13
chr6_35473129_35473618	490	Promoter (2-3kb)	35470508	35470579	72	1	102465668	ENST00000619751.1	2621	ENSG00000276712	MIR7111	microRNA 7111
chr6_36522241_36522441	201	Exon (ENST00000483066.3/ENST00000483066.3, exon 1 of 1)	36493892	36547479	53588	2	11329	ENST00000229812.8	25038	ENSG00000112079	STK38	serine/threonine kinase 38
chr6_36679292_36680737	1446	Promoter (<=1kb)	36678771	36680857	2087	1	1026	ENST00000462537.3	521	ENSG00000124762	CDKN1A	cyclin dependent kinase inhibitor 1A
chr6_46542062_46542260	199	Intron (ENST00000657801.1/101926898, intron 2 of 2)	46530234	46606162	75929	1	101926898	ENST00000657801.1	11828		RCAN2-DT	RCAN2 divergent transcript
chr6_63610539_63610748	210	Distal Intergenic	63635802	63726011	90210	1	23469	ENST00000262043.8	-25054	ENSG00000118482	PHF3	PHD finger protein 3
chr6_75374375_75374591	217	Intron (ENST00000625815.2/ENST00000625815.2, intron 2 of 4)	75308092	75363003	54912	2	27145	ENST00000370020.1	-11372	ENSG00000118407	FILIP1	filamin A interacting protein 1
chr6_108560562_108560983	422	Promoter (<=1kb)	108560917	108684774	123858	1	2309	ENST00000406360.2	0	ENSG00000118689	FOXO3	forkhead box O3
chr6_131675787_131675995	209	Intron (ENST00000427707.5/5169, intron 11 of 11)	131652857	131675378	22522	1	5169	ENST00000494023.1	22930	ENSG00000154269	ENPP3	ectonucleotide pyrophosphatase/phosphodiesterase 3
chr6_134167593_134168060	468	Distal Intergenic	134171105	134172134	1030	2	6446	ENST00000473704.1	4074	ENSG00000118515	SGK1	serum/glucocorticoid regulated kinase 1
chr6_144048229_144048460	232	Intron (ENST00000437412.5/5325, intron 1 of 3)	143942624	144064511	121888	2	5325	ENST00000626373.2	16051	ENSG00000118495	PLAGL1	PLAG1 like zinc finger 1
chr6_144216408_144216637	230	Distal Intergenic	144151704	144188383	36680	1	8676	ENST00000698357.1	64704	ENSG00000135604	STX11	syntaxin 11
chr6_146424127_146424342	216	Intron (ENST00000492807.6/2911, intron 8 of 9)	146543833	146554953	11121	1	10981	ENST00000367495.4	-119491	ENSG00000118508	RAB32	RAB32, member RAS oncogene family
chr6_151181444_151181725	282	Intron (ENST00000415477.1/102723831, intron 1 of 4)	151196681	151197638	958	2	102723831	ENST00000431947.1	15913		LOC102723831	uncharacterized LOC102723831
chr6_158095734_158096167	434	Exon (ENST00000355585.9/8871, exon 27 of 27)	158077680	158097854	20175	1	8871	ENST00000367112.1	18054	ENSG00000078269	SYNJ2	synaptojanin 2
chr6_158625943_158626248	306	Intron (ENST00000367090.4/57583, intron 13 of 16)	158609707	158609790	84	1	102465694	ENST00000612973.1	16236	ENSG00000278571	MIR7161	microRNA 7161
chr6_158700073_158700287	215	Intron (ENST00000360448.8/94120, intron 7 of 18)	158650054	158764871	114818	1	94120	ENST00000611299.5	50019	ENSG00000164674	SYTL3	synaptotagmin like 3
chr6_161464893_161465106	214	Intron (ENST00000366898.6/5071, intron 9 of 11)	161350099	161569420	219322	2	5071	ENST00000610470.4	104314	ENSG00000185345	PRKN	parkin RBR E3 ubiquitin protein ligase
chr6_165307811_165308210	400	Promoter (1-2kb)	165279664	165309605	29942	2	168090	ENST00000230301.9	1395	ENSG00000112539	C6orf118	chromosome 6 open reading frame 118
chr6_168285500_168285721	222	Distal Intergenic	168298069	168302114	4046	2	105378138	ENST00000445442.2	16393
chr6_169638891_169639112	222	Intron (ENST00000648086.1/253769, intron 3 of 7)	169457212	169649233	192022	2	253769	ENST00000479310.5	10121	ENSG00000184465	WDR27	WD repeat domain 27
chr7_2997298_2997678	381	Intron (ENST00000396946.9/84433, intron 1 of 24)	2934103	2980594	46492	2	84433	ENST00000698662.1	-16704	ENSG00000198286	CARD11	caspase recruitment domain family member 11
chr7_3091540_3091875	336	Intron (ENST00000667422.1/105375130, intron 1 of 1)	3094121	3118034	23914	2	105375130	ENST00000703009.1	26159	ENSG00000228334	LOC105375130	uncharacterized LOC105375130
chr7_4222685_4222942	258	Intron (ENST00000404826.7/221935, intron 40 of 44)	4227155	4266408	39254	1	221935	ENST00000466611.1	-4213	ENSG00000146555	SDK1	sidekick cell adhesion molecule 1
chr7_5525649_5526606	958	Promoter (1-2kb)	5527151	5528098	948	2	60	ENST00000464611.1	1492	ENSG00000075624	ACTB	actin beta
chr7_6461097_6461337	241	3' UTR	6461762	6470406	8645	2	11014	ENST00000454368.2	9069	ENSG00000136240	KDELR2	KDEL endoplasmic reticulum protein retention receptor 2
chr7_34694829_34695039	211	Intron (ENST00000360581.6/387129, intron 2 of 8)	34658409	34849668	191260	1	387129	ENST00000381539.3	36420	ENSG00000187258	NPSR1	neuropeptide S receptor 1
chr7_42878415_42878619	205	Distal Intergenic	42909622	42911910	2289	2	79020	ENST00000438029.1	33291	ENSG00000136197	C7orf25	chromosome 7 open reading frame 25
chr7_44944727_44945034	308	Distal Intergenic	44962666	44975106	12441	2	64005	ENST00000488554.5	30072	ENSG00000136286	MYO1G	myosin IG
chr7_47877232_47877453	222	Intron (ENST00000289672.7/168507, intron 22 of 56)	47791390	47837065	45676	2	168507	ENST00000686775.1	-40167	ENSG00000158683	PKD1L1	polycystin 1 like 1, transient receptor potential channel interacting
chr7_48460172_48460408	237	Intron (ENST00000435803.6/154664, intron 43 of 61)	48455063	48647496	192434	1	154664	ENST00000411975.5	5109	ENSG00000179869	ABCA13	ATP binding cassette subfamily A member 13
chr7_50613461_50613723	263	Intron (ENST00000398810.6/2887, intron 9 of 15)	50595470	50607068	11599	2	2887	ENST00000473696.1	-6393	ENSG00000106070	GRB10	growth factor receptor bound protein 10
chr7_50747857_50748124	268	Promoter (<=1kb)	50727793	50747664	19872	2	2887	ENST00000465602.1	-193	ENSG00000106070	GRB10	growth factor receptor bound protein 10
chr7_63963197_63963555	359	Exon (ENST00000428102.1/ENST00000428102.1, exon 1 of 1)	63998849	64018081	19233	1	100419780	ENST00000330020.5	-35294	ENSG00000241149	ZNF722	zinc finger protein 722
chr7_72513530_72513736	207	Distal Intergenic	71787775	72447151	659377	2	83698	ENST00000431984.5	-66379	ENSG00000183166	CALN1	calneuron 1
chr7_101061851_101062313	463	Distal Intergenic	101052987	101053606	620	1	140453	ENST00000497859.1	8864	ENSG00000169876	MUC17	mucin 17, cell surface associated
chr7_111754637_111754886	250	Intron (ENST00000423057.6/9732, intron 26 of 35)	111726747	111740214	13468	2	9732	ENST00000486186.5	-14423	ENSG00000128512	DOCK4	dedicator of cytokinesis 4
chr7_116499850_116500115	266	Promoter (<=1kb)	116500044	116506353	6310	1	858	ENST00000495841.1	0	ENSG00000105971	CAV2	caveolin 2
chr7_116525872_116526436	565	Promoter (<=1kb)	116525982	116559257	33276	1	857	ENST00000456473.5	0	ENSG00000105974	CAV1	caveolin 1
chr7_118609578_118609809	232	Distal Intergenic	118511942	118513830	1889	1	105375473	ENST00000664990.1	97636		LOC105375473	uncharacterized LOC105375473
chr7_121464560_121464775	216	Intron (ENST00000688734.1/ENST00000688734.1, intron 2 of 2)	121360056	121396364	36309	2	10447	ENST00000412653.5	-68196	ENSG00000196937	FAM3C	FAM3 metabolism regulating signaling molecule C
chr7_129765872_129766080	209	Intron (ENST00000660838.1/105375501, intron 2 of 2)	129763060	129769202	6143	2	105375501	ENST00000660838.1	3122	ENSG00000286380	LOC105375501	uncharacterized LOC105375501
chr7_132309352_132309573	222	Intron (ENST00000321063.9/91584, intron 3 of 31)	132140604	132145507	4904	2	91584	ENST00000496550.1	-163845	ENSG00000221866	PLXNA4	plexin A4
chr7_140276843_140277139	297	Distal Intergenic	140335472	140337825	2354	2	84255	ENST00000485139.1	60686	ENSG00000157800	SLC37A3	solute carrier family 37 member 3
chr7_148656765_148656967	203	Distal Intergenic	148584818	148625479	40662	2	105375557	ENST00000660070.1	-31286		LOC105375557	uncharacterized LOC105375557
chr7_149414807_149415308	502	Distal Intergenic	149398204	149401456	3253	1	101928733	ENST00000417506.1	16603	ENSG00000228151	LOC101928733	uncharacterized LOC101928733
chr7_152563582_152563823	242	Distal Intergenic	152463786	152465549	1764	1	100128822	ENST00000564834.1	99796	ENSG00000261455	LINC01003	long intergenic non-protein coding RNA 1003
chr7_155113053_155113385	333	Distal Intergenic	155077138	155084615	7478	1	3361	ENST00000486819.1	35915	ENSG00000157219	HTR5A	5-hydroxytryptamine receptor 5A
chr7_155852054_155852254	201	Distal Intergenic	155799980	155812463	12484	2	6469	ENST00000297261.7	-39591	ENSG00000164690	SHH	sonic hedgehog signaling molecule
chr8_486627_486831	205	Exon (ENST00000623988.1/ENST00000623988.1, exon 1 of 1)	492630	495010	2381	2	157695	ENST00000524229.1	8179	ENSG00000180190	TDRP	testis development related protein
chr8_6300779_6301206	428	Distal Intergenic	6044353	6257537	213185	2	105377797	ENST00000519555.1	-43242		LOC105377797	uncharacterized LOC105377797
chr8_15919510_15919862	353	Intron (ENST00000664439.1/ENST00000664439.1, intron 2 of 4)	15743530	15748846	5317	1	7991	ENST00000511342.1	175980	ENSG00000104723	TUSC3	tumor suppressor candidate 3
chr8_17311563_17311936	374	Promoter (<=1kb)	17302202	17311673	9472	2	9108	ENST00000519590.5	0	ENSG00000003987	MTMR7	myotubularin related protein 7
chr8_21070763_21071016	254	Exon (ENST00000656144.1/ENST00000656144.1, exon 1 of 3)	20950392	21112728	162337	2	105379316	ENST00000657283.1	41712		LOC105379316	uncharacterized LOC105379316
chr8_24058060_24058328	269	Distal Intergenic	23841929	23854806	12878	2	6781	ENST00000290271.7	-203254	ENSG00000159167	STC1	stanniocalcin 1
chr8_33796890_33797112	223	Promoter (<=1kb)	33796290	34039104	242815	1	105379364	ENST00000523336.2	600		LOC105379364	uncharacterized LOC105379364
chr8_41099222_41099484	263	Distal Intergenic	41271048	41271143	96	2	100847068	ENST00000579992.1	171659	ENSG00000263372	MIR548AO	microRNA 548ao
chr8_52173441_52173782	342	Intron (ENST00000689386.1/9705, intron 9 of 25)	52194362	52199580	5219	1	101929341	ENST00000522541.1	-20580	ENSG00000253551	LOC101929341	uncharacterized LOC101929341
chr8_66113218_66113569	352	Promoter (<=1kb)	66113244	66120814	7571	1	84675	ENST00000660814.1	0	ENSG00000147573	TRIM55	tripartite motif containing 55
chr8_66113954_66114253	300	Promoter (<=1kb)	66113363	66126632	13270	1	84675	ENST00000663048.1	591	ENSG00000147573	TRIM55	tripartite motif containing 55
chr8_80478949_80479207	259	Intron (ENST00000656157.1/ENST00000656157.1, intron 2 of 3)	80485619	80519804	34186	1	65986	ENST00000379091.8	-6412	ENSG00000205189	ZBTB10	zinc finger and BTB domain containing 10
chr8_83242296_83242732	437	Distal Intergenic	83403758	83408900	5143	1	103352670	ENST00000522365.1	-161026	ENSG00000253898	LINC01419	long intergenic non-protein coding RNA 1419
chr8_95269396_95269875	480	Promoter (<=1kb)	95244913	95269201	24289	2	157657	ENST00000286688.6	-195	ENSG00000156172	CFAP418	cilia and flagella associated protein 418
chr8_97472463_97472740	278	Distal Intergenic	97358265	97358478	214	1	109617016	ENST00000384486.2	114198	ENSG00000207215	SNORD3H	small nucleolar RNA, C/D box 3H
chr8_100631104_100631324	221	Intron (ENST00000311812.7/169166, intron 3 of 13)	100618582	100619980	1399	1	105375671	ENST00000521535.1	12522	ENSG00000253740	LOC105375671	uncharacterized LOC105375671
chr8_107150730_107150929	200	Distal Intergenic	107284519	107295541	11023	2	284	ENST00000522400.1	144612	ENSG00000154188	ANGPT1	angiopoietin 1
chr8_118472300_118472656	357	Intron (ENST00000409003.5/401474, intron 2 of 4)	118197306	118439861	242556	2	401474	ENST00000453675.7	-32439	ENSG00000177570	SAMD12	sterile alpha motif domain containing 12
chr8_126481355_126481564	210	Intron (ENST00000520171.1/ENST00000520171.1, intron 1 of 2)	126497385	126500440	3056	1	105375749	ENST00000648647.1	-15821
chr8_133869888_133870139	252	Distal Intergenic	133886496	133902407	15912	1	101927822	ENST00000520149.2	-16357	ENSG00000253593	LOC101927822	uncharacterized LOC101927822
chr8_141188073_141188270	198	Promoter (<=1kb)	141188349	141195802	7454	1	22898	ENST00000523308.5	-79	ENSG00000105339	DENND3	DENN domain containing 3
chr8_141602499_141602761	263	Intron (ENST00000673717.1/ENST00000673717.1, intron 2 of 8)	141514671	141518729	4059	1	122455339	ENST00000643770.2	87828	ENSG00000226490	C8orf90	chromosome 8 open reading frame 90
chr8_143912552_143914088	1537	Distal Intergenic	143915153	143939597	24445	2	5339	ENST00000345136.8	25509	ENSG00000178209	PLEC	plectin
chr9_1845646_1845893	248	Distal Intergenic	1980290	2029051	48762	1	6595	ENST00000637383.1	-134397	ENSG00000080503	SMARCA2	SWI/SNF related, matrix associated, actin dependent regulator of chromatin, subfamily a, member 2
chr9_5214353_5214566	214	Distal Intergenic	5231419	5235304	3886	1	3641	ENST00000239316.4	-16853	ENSG00000120211	INSL4	insulin like 4
chr9_13455306_13455505	200	Intron (ENST00000664575.1/105375977, intron 3 of 3)	13446482	13836571	390090	1	105375977	ENST00000664438.1	8824		LOC105375977	uncharacterized LOC105375977
chr9_20018022_20018251	230	Distal Intergenic	19507455	19789037	281583	2	25769	ENST00000341998.7	-228985	ENSG00000155886	SLC24A2	solute carrier family 24 member 2
chr9_21087105_21087306	202	Distal Intergenic	21077104	21077942	839	2	3456	ENST00000380232.4	-9163	ENSG00000171855	IFNB1	interferon beta 1
chr9_37667221_37667445	225	Promoter (<=1kb)	37668005	37746904	78900	1	22844	ENST00000539465.5	-560	ENSG00000070601	FRMPD1	FERM and PDZ domain containing 1
chr9_74183020_74183217	198	Distal Intergenic	74371335	74373048	1714	1	101927358	ENST00000669866.1	-188118	ENSG00000227809	LOC101927358	uncharacterized LOC101927358
chr9_83085573_83085829	257	Distal Intergenic	83063398	83069143	5746	1	112268037	ENST00000652950.1	22175
chr9_87709874_87710091	218	Distal Intergenic	87698409	87700217	1809	1	1612	ENST00000468482.1	11465	ENSG00000196730	DAPK1	death associated protein kinase 1
chr9_90851294_90851705	412	Intron (ENST00000375751.8/6850, intron 3 of 12)	90827488	90898549	71062	1	6850	ENST00000375746.1	23806	ENSG00000165025	SYK	spleen associated tyrosine kinase
chr9_117578344_117578579	236	Distal Intergenic	117643151	117657032	13882	1	101928797	ENST00000657171.1	-64572	ENSG00000233569	LOC101928797	uncharacterized LOC101928797
chr9_125377698_125378016	319	Distal Intergenic	125354697	125359847	5151	1	26130	ENST00000467707.1	23001	ENSG00000165219	GAPVD1	GTPase activating protein and VPS9 domains 1
chr9_126109801_126110017	217	Intron (ENST00000441473.1/ENST00000441473.1, intron 1 of 1)	126270121	126275918	5798	2	101929116	ENST00000419853.1	165901	ENSG00000288537	LOC101929116	uncharacterized LOC101929116
chr9_129002855_129003206	352	Exon (ENST00000372577.2/23511, exon 37 of 44)	128999601	129001891	2291	1	23511	ENST00000487952.1	3254	ENSG00000095319	NUP188	nucleoporin 188
chr9_129675863_129676087	225	Intron (ENST00000372469.6/51450, intron 1 of 3)	129665647	129722674	57028	1	51450	ENST00000372469.6	10216	ENSG00000167157	PRRX2	paired related homeobox 2
chr9_130519229_130519588	360	Distal Intergenic	130479856	130501178	21323	1	445	ENST00000372386.6	39373	ENSG00000130707	ASS1	argininosuccinate synthase 1
chr9_136324940_136325143	204	Promoter (<=1kb)	136322303	136325218	2916	2	26102	ENST00000601276.2	75	ENSG00000262075	DKFZP434A062	uncharacterized LOC26102
chr9_137496850_137497313	464	Exon (ENST00000406427.6/375775, exon 18 of 35)	137459953	137480727	20775	2	375775	ENST00000469998.1	-16123	ENSG00000130653	PNPLA7	patatin like phospholipase domain containing 7
chrX_9843427_9843660	234	Intron (ENST00000380913.8/357, intron 1 of 9)	9898145	9937146	39002	1	357	ENST00000493668.1	-54485	ENSG00000146950	SHROOM2	shroom family member 2
chrX_21778616_21778902	287	Distal Intergenic	21705978	21758116	52139	2	23676	ENST00000379494.4	-20500	ENSG00000091482	SMPX	small muscle protein X-linked
chrX_25522502_25522754	253	Distal Intergenic	25878339	25893544	15206	1	107985707	ENST00000423914.1	-355585		LOC107985707	uncharacterized LOC107985707
chrX_32326647_32326879	233	Intron (ENST00000358062.7/1756, intron 5 of 40)	32342631	32348510	5880	2	1756	ENST00000493412.1	21631	ENSG00000198947	DMD	dystrophin
chrX_51903264_51903588	325	Exon (ENST00000428250.1/ENST00000428250.1, exon 2 of 2)	51898611	51902354	3744	1	9500	ENST00000473931.1	4653	ENSG00000179222	MAGED1	MAGE family member D1
chrX_87350369_87350651	283	Distal Intergenic	87517409	87670043	152635	1	56062	ENST00000652270.1	-166758	ENSG00000102271	KLHL4	kelch like family member 4
chrX_87750921_87751160	240	Distal Intergenic	87517814	87669596	151783	1	56062	ENST00000373114.4	233107	ENSG00000102271	KLHL4	kelch like family member 4
chrX_98057647_98057880	234	Distal Intergenic	97533173	97617259	84087	2	10824	ENST00000445414.1	-440388	ENSG00000236256	DIAPH2-AS1	DIAPH2 antisense RNA 1
chrX_112848165_112848370	206	Distal Intergenic	112774877	112840831	65955	2	154796	ENST00000371959.9	-7334	ENSG00000126016	AMOT	angiomotin
chrX_128780667_128780927	261	Intron (ENST00000660383.1/107985698, intron 5 of 10)	128322359	128769944	447586	2	107985698	ENST00000657074.1	-10723		LOC107985698	uncharacterized LOC107985698
chrX_133945106_133945342	237	Intron (ENST00000370818.8/2719, intron 2 of 7)	133536124	133985449	449326	2	2719	ENST00000631057.2	40107	ENSG00000147257	GPC3	glypican 3
chrX_142058531_142059001	471	Intron (ENST00000664519.1/105373345, intron 1 of 9)	141934496	142740581	806086	1	105373345	ENST00000664519.1	124035		LOC105373345	uncharacterized LOC105373345
chrX_143050492_143050761	270	Distal Intergenic	143025932	143034702	8771	1	441525	ENST00000370504.3	24560	ENSG00000189326	SPANXN4	SPANX family member N4

## Sheet: List of peaks in heatmap(Fig5G)
Table S5. Enriched Peaks in ILF2 ChIP sequencing [List of peaks in heatmap (Fig 5G)]
#chrom	start	end	name	thickStart	thickEnd	itemRGB	blockCount	blockSizes	blockStart
chr1	16628388	16628620	chr1:16628388-16628620	16628388	16628620	0	1	232	16628387
chr19	48968846	48969738	chr19:48968846-48969738	48968846	48969738	0	1	892	48968842
chr5	181188387	181189034	chr5:181188387-181189034	181188387	181189034	0	1	647	181188386
chr6	379126	379339	chr6:379126-379339	379126	379339	0	1	213	379123
chr6	378513	378775	chr6:378513-378775	378513	378775	0	1	262	378510
chr10	5832922	5833155	chr10:5832922-5833155	5832922	5833155	0	1	233	5832917
chr12	109535264	109535608	chr12:109535264-109535608	109535264	109535608	0	1	344	109535263
chr11	77151650	77151915	chr11:77151650-77151915	77151650	77151915	0	1	265	77151643
chr20	62468527	62468851	chr20:62468527-62468851	62468527	62468851	0	1	324	62468521
chr16	84440365	84440580	chr16:84440365-84440580	84440365	84440580	0	1	215	84440357
chr19	3538871	3539094	chr19:3538871-3539094	3538871	3539094	0	1	223	3538868
chr9	131521254	131521533	chr9:131521254-131521533	131521254	131521533	0	1	279	131521253
chr7	158542517	158542916	chr7:158542517-158542916	158542517	158542916	0	1	399	158542516
chr10	102475575	102475834	chr10:102475575-102475834	102475575	102475834	0	1	259	102475574
chr2	121236512	121236909	chr2:121236512-121236909	121236512	121236909	0	1	397	121236511
chr14	24607779	24608206	chr14:24607779-24608206	24607779	24608206	0	1	427	24607777
chr7	130142708	130142955	chr7:130142708-130142955	130142708	130142955	0	1	247	130142707
chr2	96135662	96135905	chr2:96135662-96135905	96135662	96135905	0	1	243	96135653
chr17	17171071	17171319	chr17:17171071-17171319	17171071	17171319	0	1	248	17171070
chr11	62840943	62841743	chr11:62840943-62841743	62840943	62841743	0	1	800	62840937
chr2	127642754	127643085	chr2:127642754-127643085	127642754	127643085	0	1	331	127642753
chr5	2131861	2132105	chr5:2131861-2132105	2131861	2132105	0	1	244	2131859
chr16	28025732	28026015	chr16:28025732-28026015	28025732	28026015	0	1	283	28025730
chr10	1020634	1020865	chr10:1020634-1020865	1020634	1020865	0	1	231	1020633
chr1	223618952	223619468	chr1:223618952-223619468	223618952	223619468	0	1	516	223618950
chrX	151738556	151738936	chrX:151738556-151738936	151738556	151738936	0	1	380	151738555
chr17	28725691	28726203	chr17:28725691-28726203	28725691	28726203	0	1	512	28725689
chr18	73831640	73832234	chr18:73831640-73832234	73831640	73832234	0	1	594	73831633
chr16	12566417	12567102	chr16:12566417-12567102	12566417	12567102	0	1	685	12566416
chr11	69001534	69001747	chr11:69001534-69001747	69001534	69001747	0	1	213	69001528
chr13	113840715	113840944	chr13:113840715-113840944	113840715	113840944	0	1	229	113840714
chr1	41028173	41028538	chr1:41028173-41028538	41028173	41028538	0	1	365	41028169
chr11	46401558	46401818	chr11:46401558-46401818	46401558	46401818	0	1	260	46401554
chr16	50617037	50617265	chr16:50617037-50617265	50617037	50617265	0	1	228	50617032
chr3	42667425	42667767	chr3:42667425-42667767	42667425	42667767	0	1	342	42667421
chr22	36556833	36557392	chr22:36556833-36557392	36556833	36557392	0	1	559	36556830
chr12	64946484	64946700	chr12:64946484-64946700	64946484	64946700	0	1	216	64946478
chr1	22568135	22568351	chr1:22568135-22568351	22568135	22568351	0	1	216	22568133
chr5	139700756	139701013	chr5:139700756-139701013	139700756	139701013	0	1	257	139700755
chr11	131613829	131614276	chr11:131613829-131614276	131613829	131614276	0	1	447	131613828
chr2	232687825	232688229	chr2:232687825-232688229	232687825	232688229	0	1	404	232687823
chr2	95373747	95374061	chr2:95373747-95374061	95373747	95374061	0	1	314	95373738
chr10	79422729	79423135	chr10:79422729-79423135	79422729	79423135	0	1	406	79422722
chr8	27239074	27239304	chr8:27239074-27239304	27239074	27239304	0	1	230	27239072
chr1	22376052	22376399	chr1:22376052-22376399	22376052	22376399	0	1	347	22376050
chr1	58783658	58784015	chr1:58783658-58784015	58783658	58784015	0	1	357	58783653	JUN
chr19	14569276	14569494	chr19:14569276-14569494	14569276	14569494	0	1	218	14569275
chr2	218823004	218823245	chr2:218823004-218823245	218823004	218823245	0	1	241	218823002
chr10	127429613	127429955	chr10:127429613-127429955	127429613	127429955	0	1	342	127429612
chr8	143502830	143503171	chr8:143502830-143503171	143502830	143503171	0	1	341	143502829
chr14	22884324	22885070	chr14:22884324-22885070	22884324	22885070	0	1	746	22884322
chr17	73549467	73549725	chr17:73549467-73549725	73549467	73549725	0	1	258	73549460
chr10	130381437	130381874	chr10:130381437-130381874	130381437	130381874	0	1	437	130381436
chr12	1505479	1505844	chr12:1505479-1505844	1505479	1505844	0	1	365	1505478
chr8	22676109	22676460	chr8:22676109-22676460	22676109	22676460	0	1	351	22676107
chr16	301918	302147	chr16:301918-302147	301918	302147	0	1	229	301915
chr10	815085	815378	chr10:815085-815378	815085	815378	0	1	293	815077
chr7	98322640	98322926	chr7:98322640-98322926	98322640	98322926	0	1	286	98322631
chr13	111302219	111302549	chr13:111302219-111302549	111302219	111302549	0	1	330	111302218
chr12	122865358	122865652	chr12:122865358-122865652	122865358	122865652	0	1	294	122865357
chr1	204870349	204870661	chr1:204870349-204870661	204870349	204870661	0	1	312	204870347
chr12	110858729	110858950	chr12:110858729-110858950	110858729	110858950	0	1	221	110858728
chr1	21319586	21320003	chr1:21319586-21320003	21319586	21320003	0	1	417	21319584
chr1	181741742	181742294	chr1:181741742-181742294	181741742	181742294	0	1	552	181741741
chr11	69892989	69893350	chr11:69892989-69893350	69892989	69893350	0	1	361	69892983
chr10	73867141	73867368	chr10:73867141-73867368	73867141	73867368	0	1	227	73867134
chr12	120656021	120656284	chr12:120656021-120656284	120656021	120656284	0	1	263	120656020
chr21	44834870	44835316	chr21:44834870-44835316	44834870	44835316	0	1	446	44834866
chr20	48548880	48549418	chr20:48548880-48549418	48548880	48549418	0	1	538	48548876
chr12	125297260	125297475	chr12:125297260-125297475	125297260	125297475	0	1	215	125297259
chr22	37735194	37735517	chr22:37735194-37735517	37735194	37735517	0	1	323	37735191
chr3	47572747	47573120	chr3:47572747-47573120	47572747	47573120	0	1	373	47572743
chr10	71703706	71704075	chr10:71703706-71704075	71703706	71704075	0	1	369	71703699
chr14	75319850	75320094	chr14:75319850-75320094	75319850	75320094	0	1	244	75319843
chr5	139818185	139818478	chr5:139818185-139818478	139818185	139818478	0	1	293	139818184
chr13	100525203	100525544	chr13:100525203-100525544	100525203	100525544	0	1	341	100525202
chr17	34782361	34782696	chr17:34782361-34782696	34782361	34782696	0	1	335	34782358
chr9	137136126	137136405	chr9:137136126-137136405	137136126	137136405	0	1	279	137136125
chr11	120595844	120596095	chr11:120595844-120596095	120595844	120596095	0	1	251	120595843
chr19	16272932	16273181	chr19:16272932-16273181	16272932	16273181	0	1	249	16272931
chr12	2849048	2849605	chr12:2849048-2849605	2849048	2849605	0	1	557	2849046
chr6	13283408	13283855	chr6:13283408-13283855	13283408	13283855	0	1	447	13283407
chr2	174711904	174712262	chr2:174711904-174712262	174711904	174712262	0	1	358	174711903
chr11	70696028	70696271	chr11:70696028-70696271	70696028	70696271	0	1	243	70696021
chr4	25111188	25111684	chr4:25111188-25111684	25111188	25111684	0	1	496	25111186
chr2	237577990	237578437	chr2:237577990-237578437	237577990	237578437	0	1	447	237577988
chr11	75170623	75170997	chr11:75170623-75170997	75170623	75170997	0	1	374	75170616
chr2	3263318	3263605	chr2:3263318-3263605	3263318	3263605	0	1	287	3263315
chr4	877528	877830	chr4:877528-877830	877528	877830	0	1	302	877520
chr3	10472447	10472762	chr3:10472447-10472762	10472447	10472762	0	1	315	10472446
chr11	69115869	69116106	chr11:69115869-69116106	69115869	69116106	0	1	237	69115863
chr5	172571688	172572061	chr5:172571688-172572061	172571688	172572061	0	1	373	172571687
chr10	128952304	128952554	chr10:128952304-128952554	128952304	128952554	0	1	250	128952303
chr1	226385958	226386208	chr1:226385958-226386208	226385958	226386208	0	1	250	226385956
chr19	35439386	35439661	chr19:35439386-35439661	35439386	35439661	0	1	275	35439383
chr14	105171114	105171468	chr14:105171114-105171468	105171114	105171468	0	1	354	105171113
chr1	51288721	51288987	chr1:51288721-51288987	51288721	51288987	0	1	266	51288716
chr12	113881096	113881329	chr12:113881096-113881329	113881096	113881329	0	1	233	113881095
chr19	27771069	27771319	chr19:27771069-27771319	27771069	27771319	0	1	250	27771067
chr20	41726827	41727086	chr20:41726827-41727086	41726827	41727086	0	1	259	41726823
chr13	110476376	110476652	chr13:110476376-110476652	110476376	110476652	0	1	276	110476375
chr17	58242406	58242640	chr17:58242406-58242640	58242406	58242640	0	1	234	58242401
chr3	37641539	37641932	chr3:37641539-37641932	37641539	37641932	0	1	393	37641536
chr2	30752875	30753435	chr2:30752875-30753435	30752875	30753435	0	1	560	30752872
chr1	247454179	247454403	chr1:247454179-247454403	247454179	247454403	0	1	224	247454177
chr22	48143635	48144037	chr22:48143635-48144037	48143635	48144037	0	1	402	48143631
chr22	47564769	47565064	chr22:47564769-47565064	47564769	47565064	0	1	295	47564765
chr2	110869687	110870045	chr2:110869687-110870045	110869687	110870045	0	1	358	110869686
chr2	231047058	231047524	chr2:231047058-231047524	231047058	231047524	0	1	466	231047056
chr22	26789484	26789779	chr22:26789484-26789779	26789484	26789779	0	1	295	26789482
chr19	3971210	3971572	chr19:3971210-3971572	3971210	3971572	0	1	362	3971207
chr1	12563560	12563842	chr1:12563560-12563842	12563560	12563842	0	1	282	12563559
chr19	30314110	30314575	chr19:30314110-30314575	30314110	30314575	0	1	465	30314107
chr19	2674535	2674865	chr19:2674535-2674865	2674535	2674865	0	1	330	2674533
chr2	10279597	10279937	chr2:10279597-10279937	10279597	10279937	0	1	340	10279596
chr4	8598936	8599212	chr4:8598936-8599212	8598936	8599212	0	1	276	8598928
chr16	926058	926277	chr16:926058-926277	926058	926277	0	1	219	926049
chr6	88573786	88574098	chr6:88573786-88574098	88573786	88574098	0	1	312	88573778
chr12	108624183	108624436	chr12:108624183-108624436	108624183	108624436	0	1	253	108624182
chr10	80602963	80603199	chr10:80602963-80603199	80602963	80603199	0	1	236	80602955
chr17	82722268	82722637	chr17:82722268-82722637	82722268	82722637	0	1	369	82722260
chr1	13488962	13489194	chr1:13488962-13489194	13488962	13489194	0	1	232	13488961
chr22	49641306	49641614	chr22:49641306-49641614	49641306	49641614	0	1	308	49641302
chr19	48885141	48885401	chr19:48885141-48885401	48885141	48885401	0	1	260	48885137
chr3	50220664	50221069	chr3:50220664-50221069	50220664	50221069	0	1	405	50220659
chr16	49339559	49339775	chr16:49339559-49339775	49339559	49339775	0	1	216	49339555
chr8	38605768	38606155	chr8:38605768-38606155	38605768	38606155	0	1	387	38605765
chr3	72865906	72866132	chr3:72865906-72866132	72865906	72866132	0	1	226	72865899
chr22	36244167	36244390	chr22:36244167-36244390	36244167	36244390	0	1	223	36244164
chr12	106695959	106696188	chr12:106695959-106696188	106695959	106696188	0	1	229	106695958
chr15	26941728	26941973	chr15:26941728-26941973	26941728	26941973	0	1	245	26941726
chr18	78069730	78070024	chr18:78069730-78070024	78069730	78070024	0	1	294	78069723
chr17	76788573	76788828	chr17:76788573-76788828	76788573	76788828	0	1	255	76788566
chr2	84813322	84813549	chr2:84813322-84813549	84813322	84813549	0	1	227	84813314
chr3	46206355	46206571	chr3:46206355-46206571	46206355	46206571	0	1	216	46206351
chr20	33106734	33106969	chr20:33106734-33106969	33106734	33106969	0	1	235	33106731
chr22	37986463	37986783	chr22:37986463-37986783	37986463	37986783	0	1	320	37986460
chr17	82252371	82252587	chr17:82252371-82252587	82252371	82252587	0	1	216	82252363
chr9	137396963	137397329	chr9:137396963-137397329	137396963	137397329	0	1	366	137396962
chr12	119759022	119759369	chr12:119759022-119759369	119759022	119759369	0	1	347	119759021
chr1	117680071	117680294	chr1:117680071-117680294	117680071	117680294	0	1	223	117680070
chr9	121696374	121696639	chr9:121696374-121696639	121696374	121696639	0	1	265	121696373
chr5	168688096	168688445	chr5:168688096-168688445	168688096	168688445	0	1	349	168688095
chr19	35657840	35658073	chr19:35657840-35658073	35657840	35658073	0	1	233	35657837
chr6	1020981	1021441	chr6:1020981-1021441	1020981	1021441	0	1	460	1020980
chr1	13912195	13912440	chr1:13912195-13912440	13912195	13912440	0	1	245	13912194
chr1	166041638	166042016	chr1:166041638-166042016	166041638	166042016	0	1	378	166041637
chr7	132614430	132614732	chr7:132614430-132614732	132614430	132614732	0	1	302	132614429
chr17	2992585	2992846	chr17:2992585-2992846	2992585	2992846	0	1	261	2992583
chr3	128436166	128436523	chr3:128436166-128436523	128436166	128436523	0	1	357	128436165
chr13	21901469	21901978	chr13:21901469-21901978	21901469	21901978	0	1	509	21901467
chr10	11403175	11403420	chr10:11403175-11403420	11403175	11403420	0	1	245	11403174
chr20	36984198	36984437	chr20:36984198-36984437	36984198	36984437	0	1	239	36984195
chr6	166605942	166606178	chr6:166605942-166606178	166605942	166606178	0	1	236	166605941
chr14	76099783	76100039	chr14:76099783-76100039	76099783	76100039	0	1	256	76099776
chr9	93867941	93868340	chr9:93867941-93868340	93867941	93868340	0	1	399	93867932
chr2	3044902	3045326	chr2:3044902-3045326	3044902	3045326	0	1	424	3044899
chr5	133140580	133140836	chr5:133140580-133140836	133140580	133140836	0	1	256	133140579
chr16	84171426	84171711	chr16:84171426-84171711	84171426	84171711	0	1	285	84171418
chr14	92646226	92646601	chr14:92646226-92646601	92646226	92646601	0	1	375	92646217
chr1	145876712	145876929	chr1:145876712-145876929	145876712	145876929	0	1	217	145876711
chr9	130987063	130987317	chr9:130987063-130987317	130987063	130987317	0	1	254	130987062
chr19	30887156	30887414	chr19:30887156-30887414	30887156	30887414	0	1	258	30887153
chr10	35700579	35700853	chr10:35700579-35700853	35700579	35700853	0	1	274	35700576
chr6	43830492	43830957	chr6:43830492-43830957	43830492	43830957	0	1	465	43830488
chr9	95564062	95564307	chr9:95564062-95564307	95564062	95564307	0	1	245	95564053
chr2	235891576	235892023	chr2:235891576-235892023	235891576	235892023	0	1	447	235891574
chr1	4793962	4794260	chr1:4793962-4794260	4793962	4794260	0	1	298	4793958
chr2	132725710	132725924	chr2:132725710-132725924	132725710	132725924	0	1	214	132725709
chr9	87507212	87507534	chr9:87507212-87507534	87507212	87507534	0	1	322	87507204
chr15	69096239	69096551	chr15:69096239-69096551	69096239	69096551	0	1	312	69096233
chr2	129363162	129363553	chr2:129363162-129363553	129363162	129363553	0	1	391	129363161
chr1	56977375	56977712	chr1:56977375-56977712	56977375	56977712	0	1	337	56977370
chr9	107564081	107564910	chr9:107564081-107564910	107564081	107564910	0	1	829	107564080
chr4	16121111	16121324	chr4:16121111-16121324	16121111	16121324	0	1	213	16121110
chr16	66471471	66471688	chr16:66471471-66471688	66471471	66471688	0	1	217	66471465
chr2	98748616	98748973	chr2:98748616-98748973	98748616	98748973	0	1	357	98748607
chr7	26216561	26217003	chr7:26216561-26217003	26216561	26217003	0	1	442	26216559
chr4	87277074	87277585	chr4:87277074-87277585	87277074	87277585	0	1	511	87277066
chr3	134803130	134803432	chr3:134803130-134803432	134803130	134803432	0	1	302	134803129
chr10	126407050	126407295	chr10:126407050-126407295	126407050	126407295	0	1	245	126407049
chr19	17437506	17437732	chr19:17437506-17437732	17437506	17437732	0	1	226	17437505
chr7	6017589	6017868	chr7:6017589-6017868	6017589	6017868	0	1	279	6017583
chrX	16889454	16889667	chrX:16889454-16889667	16889454	16889667	0	1	213	16889453
chr4	181580310	181580537	chr4:181580310-181580537	181580310	181580537	0	1	227	181580309
chr22	27466372	27466601	chr22:27466372-27466601	27466372	27466601	0	1	229	27466370
chr7	30827302	30827552	chr7:30827302-30827552	30827302	30827552	0	1	250	30827299
chr6	41269777	41270183	chr6:41269777-41270183	41269777	41270183	0	1	406	41269773
chr7	155964590	155964820	chr7:155964590-155964820	155964590	155964820	0	1	230	155964589
chr7	156198268	156198551	chr7:156198268-156198551	156198268	156198551	0	1	283	156198267
chr19	32497285	32497653	chr19:32497285-32497653	32497285	32497653	0	1	368	32497282
chr3	185646983	185647392	chr3:185646983-185647392	185646983	185647392	0	1	409	185646982
chr5	1759564	1759923	chr5:1759564-1759923	1759564	1759923	0	1	359	1759563
chr20	17509476	17509821	chr20:17509476-17509821	17509476	17509821	0	1	345	17509475
chr11	126090475	126090773	chr11:126090475-126090773	126090475	126090773	0	1	298	126090474
chr20	48706843	48707160	chr20:48706843-48707160	48706843	48707160	0	1	317	48706839
chr2	90074387	90074611	chr2:90074387-90074611	90074387	90074611	0	1	224	90074378
chr5	819373	819640	chr5:819373-819640	819373	819640	0	1	267	819365
chr10	130275175	130275432	chr10:130275175-130275432	130275175	130275432	0	1	257	130275174
chr19	33424232	33424453	chr19:33424232-33424453	33424232	33424453	0	1	221	33424229
chr2	129634861	129635199	chr2:129634861-129635199	129634861	129635199	0	1	338	129634860
chr2	23071820	23072414	chr2:23071820-23072414	23071820	23072414	0	1	594	23071818
chr20	55987002	55987274	chr20:55987002-55987274	55987002	55987274	0	1	272	55986997
chr16	83231410	83231633	chr16:83231410-83231633	83231410	83231633	0	1	223	83231402
chrX	153813405	153813856	chrX:153813405-153813856	153813405	153813856	0	1	451	153813404
chr2	187934492	187934769	chr2:187934492-187934769	187934492	187934769	0	1	277	187934491
chr8	667656	668047	chr8:667656-668047	667656	668047	0	1	391	667650
chr6	165843534	165844047	chr6:165843534-165844047	165843534	165844047	0	1	513	165843533
chr14	104240921	104241171	chr14:104240921-104241171	104240921	104241171	0	1	250	104240920
chr10	96726168	96726493	chr10:96726168-96726493	96726168	96726493	0	1	325	96726159
chr17	39252989	39253422	chr17:39252989-39253422	39252989	39253422	0	1	433	39252986
chr15	92169409	92169824	chr15:92169409-92169824	92169409	92169824	0	1	415	92169400
chr18	58098040	58098538	chr18:58098040-58098538	58098040	58098538	0	1	498	58098035
chr11	134450175	134450499	chr11:134450175-134450499	134450175	134450499	0	1	324	134450174
chr2	122205781	122206151	chr2:122205781-122206151	122205781	122206151	0	1	370	122205780
chr2	30172096	30172427	chr2:30172096-30172427	30172096	30172427	0	1	331	30172093
chrX	117391106	117391340	chrX:117391106-117391340	117391106	117391340	0	1	234	117391105
chr20	51397401	51397720	chr20:51397401-51397720	51397401	51397720	0	1	319	51397396
chr11	5514902	5515248	chr11:5514902-5515248	5514902	5515248	0	1	346	5514897
chr19	46007833	46008265	chr19:46007833-46008265	46007833	46008265	0	1	432	46007829
chr5	61621314	61621547	chr5:61621314-61621547	61621314	61621547	0	1	233	61621308
chr2	4248452	4248705	chr2:4248452-4248705	4248452	4248705	0	1	253	4248448
chr17	63304951	63305212	chr17:63304951-63305212	63304951	63305212	0	1	261	63304945
chr6	148545735	148546270	chr6:148545735-148546270	148545735	148546270	0	1	535	148545734
chr18	50662963	50663270	chr18:50662963-50663270	50662963	50663270	0	1	307	50662958
chr18	78857348	78857814	chr18:78857348-78857814	78857348	78857814	0	1	466	78857341
chr4	10141325	10141603	chr4:10141325-10141603	10141325	10141603	0	1	278	10141324
chr20	20208656	20209224	chr20:20208656-20209224	20208656	20209224	0	1	568	20208654
chr10	6328136	6328431	chr10:6328136-6328431	6328136	6328431	0	1	295	6328130
chr7	45601928	45602342	chr7:45601928-45602342	45601928	45602342	0	1	414	45601924
chr1	14078716	14078986	chr1:14078716-14078986	14078716	14078986	0	1	270	14078715
chr6	36946491	36946725	chr6:36946491-36946725	36946491	36946725	0	1	234	36946488
chr18	13393403	13393691	chr18:13393403-13393691	13393403	13393691	0	1	288	13393402
chr10	133196376	133196741	chr10:133196376-133196741	133196376	133196741	0	1	365	133196375
chr4	25003800	25004291	chr4:25003800-25004291	25003800	25004291	0	1	491	25003798
chr11	72477583	72477823	chr11:72477583-72477823	72477583	72477823	0	1	240	72477576
chr5	173557121	173557370	chr5:173557121-173557370	173557121	173557370	0	1	249	173557120
chr2	55120084	55120377	chr2:55120084-55120377	55120084	55120377	0	1	293	55120079
chr22	16953800	16954130	chr22:16953800-16954130	16953800	16954130	0	1	330	16953799
chr7	72409055	72409286	chr7:72409055-72409286	72409055	72409286	0	1	231	72409048
chr20	48044512	48045099	chr20:48044512-48045099	48044512	48045099	0	1	587	48044508
chr17	12419495	12420003	chr17:12419495-12420003	12419495	12420003	0	1	508	12419494
chr5	5358542	5358816	chr5:5358542-5358816	5358542	5358816	0	1	274	5358537
chr11	9455254	9455531	chr11:9455254-9455531	9455254	9455531	0	1	277	9455245
chr10	1759938	1760333	chr10:1759938-1760333	1759938	1760333	0	1	395	1759937
chr2	134075366	134075648	chr2:134075366-134075648	134075366	134075648	0	1	282	134075365
chr16	35525987	35526373	chr16:35525987-35526373	35525987	35526373	0	1	386	35525984
chr10	70354919	70355265	chr10:70354919-70355265	70354919	70355265	0	1	346	70354912
chr4	188041816	188042106	chr4:188041816-188042106	188041816	188042106	0	1	290	188041815
chr1	228968888	228969194	chr1:228968888-228969194	228968888	228969194	0	1	306	228968886
chr11	133060521	133060898	chr11:133060521-133060898	133060521	133060898	0	1	377	133060520
chr7	130056580	130056929	chr7:130056580-130056929	130056580	130056929	0	1	349	130056579
chr14	90022087	90022575	chr14:90022087-90022575	90022087	90022575	0	1	488	90022078
chr17	41544573	41544937	chr17:41544573-41544937	41544573	41544937	0	1	364	41544569
chr16	19345097	19345511	chr16:19345097-19345511	19345097	19345511	0	1	414	19345096
chr20	56489428	56489803	chr20:56489428-56489803	56489428	56489803	0	1	375	56489423
chr17	15503940	15504160	chr17:15503940-15504160	15503940	15504160	0	1	220	15503939
chr10	8101934	8102157	chr10:8101934-8102157	8101934	8102157	0	1	223	8101926
chr20	42845910	42846488	chr20:42845910-42846488	42845910	42846488	0	1	578	42845906
chr15	77114423	77114641	chr15:77114423-77114641	77114423	77114641	0	1	218	77114416
chr16	3518766	3519008	chr16:3518766-3519008	3518766	3519008	0	1	242	3518763
chr16	12836573	12836789	chr16:12836573-12836789	12836573	12836789	0	1	216	12836572
chr10	86326854	86327069	chr10:86326854-86327069	86326854	86327069	0	1	215	86326846
chr13	30471839	30472121	chr13:30471839-30472121	30471839	30472121	0	1	282	30471836
chr16	83350017	83350284	chr16:83350017-83350284	83350017	83350284	0	1	267	83350009
chrX	138490093	138490642	chrX:138490093-138490642	138490093	138490642	0	1	549	138490092
chr18	13289846	13290169	chr18:13289846-13290169	13289846	13290169	0	1	323	13289845
chr5	133713309	133713553	chr5:133713309-133713553	133713309	133713553	0	1	244	133713308
chr7	3113763	3114142	chr7:3113763-3114142	3113763	3114142	0	1	379	3113760
chr13	21875706	21875982	chr13:21875706-21875982	21875706	21875982	0	1	276	21875704
chr15	91780822	91781188	chr15:91780822-91781188	91780822	91781188	0	1	366	91780813
chr11	129573594	129573868	chr11:129573594-129573868	129573594	129573868	0	1	274	129573593
chr9	113321191	113321416	chr9:113321191-113321416	113321191	113321416	0	1	225	113321190
chr3	51792196	51792918	chr3:51792196-51792918	51792196	51792918	0	1	722	51792191
chr1	244265837	244266260	chr1:244265837-244266260	244265837	244266260	0	1	423	244265835
chr3	158872156	158872726	chr3:158872156-158872726	158872156	158872726	0	1	570	158872155
chr4	129133300	129133771	chr4:129133300-129133771	129133300	129133771	0	1	471	129133299
chr8	20542773	20543114	chr8:20542773-20543114	20542773	20543114	0	1	341	20542771
chr11	124734511	124734812	chr11:124734511-124734812	124734511	124734812	0	1	301	124734510
chr12	95340720	95340993	chr12:95340720-95340993	95340720	95340993	0	1	273	95340711
chr10	2772466	2772723	chr10:2772466-2772723	2772466	2772723	0	1	257	2772464
chr1	104860404	104860683	chr1:104860404-104860683	104860404	104860683	0	1	279	104860403
chr2	108289853	108290108	chr2:108289853-108290108	108289853	108290108	0	1	255	108289852
chr10	104480975	104481306	chr10:104480975-104481306	104480975	104481306	0	1	331	104480974
chr1	79875278	79875582	chr1:79875278-79875582	79875278	79875582	0	1	304	79875271
chr10	47264856	47265150	chr10:47264856-47265150	47264856	47265150	0	1	294	47264852
chr12	96539306	96539640	chr12:96539306-96539640	96539306	96539640	0	1	334	96539297
chrX	119036016	119036231	chrX:119036016-119036231	119036016	119036231	0	1	215	119036015
chr17	57156202	57156661	chr17:57156202-57156661	57156202	57156661	0	1	459	57156197
chr5	68818073	68818387	chr5:68818073-68818387	68818073	68818387	0	1	314	68818067
chr15	26895623	26895970	chr15:26895623-26895970	26895623	26895970	0	1	347	26895621
chr2	2512928	2513256	chr2:2512928-2513256	2512928	2513256	0	1	328	2512926
chr18	13165232	13165586	chr18:13165232-13165586	13165232	13165586	0	1	354	13165231
chr1	56258390	56258703	chr1:56258390-56258703	56258390	56258703	0	1	313	56258385
chr2	175343406	175343625	chr2:175343406-175343625	175343406	175343625	0	1	219	175343405
chr18	44771618	44771890	chr18:44771618-44771890	44771618	44771890	0	1	272	44771614
chr2	120643785	120644195	chr2:120643785-120644195	120643785	120644195	0	1	410	120643784
chr18	77616461	77617063	chr18:77616461-77617063	77616461	77617063	0	1	602	77616454
chrX	132714412	132714699	chrX:132714412-132714699	132714412	132714699	0	1	287	132714411
chr3	196317945	196318295	chr3:196317945-196318295	196317945	196318295	0	1	350	196317944
chr15	51181304	51181589	chr15:51181304-51181589	51181304	51181589	0	1	285	51181299
chr6	21616308	21616595	chr6:21616308-21616595	21616308	21616595	0	1	287	21616306
chr14	97395120	97395403	chr14:97395120-97395403	97395120	97395403	0	1	283	97395111
chr17	12322377	12322596	chr17:12322377-12322596	12322377	12322596	0	1	219	12322376
chr2	219921118	219921384	chr2:219921118-219921384	219921118	219921384	0	1	266	219921116
chr1	35886110	35886508	chr1:35886110-35886508	35886110	35886508	0	1	398	35886107
chr5	145777916	145778503	chr5:145777916-145778503	145777916	145778503	0	1	587	145777915
chr11	131954176	131954442	chr11:131954176-131954442	131954176	131954442	0	1	266	131954175
chr11	108965792	108966017	chr11:108965792-108966017	108965792	108966017	0	1	225	108965791
chr6	159338234	159338755	chr6:159338234-159338755	159338234	159338755	0	1	521	159338233
chr14	95081756	95081978	chr14:95081756-95081978	95081756	95081978	0	1	222	95081747
chr20	53308881	53309100	chr20:53308881-53309100	53308881	53309100	0	1	219	53308876
chr1	177777356	177777644	chr1:177777356-177777644	177777356	177777644	0	1	288	177777355
chr2	101202894	101203169	chr2:101202894-101203169	101202894	101203169	0	1	275	101202893
chr7	137909622	137910229	chr7:137909622-137910229	137909622	137910229	0	1	607	137909621
chrX	15295933	15296188	chrX:15295933-15296188	15295933	15296188	0	1	255	15295932
chr7	100392211	100392425	chr7:100392211-100392425	100392211	100392425	0	1	214	100392210
chr7	48292341	48292708	chr7:48292341-48292708	48292341	48292708	0	1	367	48292337
chr4	35710000	35710571	chr4:35710000-35710571	35710000	35710571	0	1	571	35709997
chr22	40301013	40301331	chr22:40301013-40301331	40301013	40301331	0	1	318	40301009
chr13	40338152	40338492	chr13:40338152-40338492	40338152	40338492	0	1	340	40338148
chr16	17850836	17851162	chr16:17850836-17851162	17850836	17851162	0	1	326	17850835
chr7	4378471	4378995	chr7:4378471-4378995	4378471	4378995	0	1	524	4378467
chr2	153221601	153221863	chr2:153221601-153221863	153221601	153221863	0	1	262	153221600
chr9	105123429	105123801	chr9:105123429-105123801	105123429	105123801	0	1	372	105123428
chr7	159122174	159122568	chr7:159122174-159122568	159122174	159122568	0	1	394	159122173
chr6	88540631	88540882	chr6:88540631-88540882	88540631	88540882	0	1	251	88540623
chr11	112817371	112817623	chr11:112817371-112817623	112817371	112817623	0	1	252	112817370
chr4	41982096	41982731	chr4:41982096-41982731	41982096	41982731	0	1	635	41982092
chr5	5052169	5052430	chr5:5052169-5052430	5052169	5052430	0	1	261	5052164
chr3	190416369	190416958	chr3:190416369-190416958	190416369	190416958	0	1	589	190416368
chr6	165484375	165484742	chr6:165484375-165484742	165484375	165484742	0	1	367	165484374
chr12	127459822	127460256	chr12:127459822-127460256	127459822	127460256	0	1	434	127459821
chr8	5943826	5944063	chr8:5943826-5944063	5943826	5944063	0	1	237	5943821
chr5	31388684	31389019	chr5:31388684-31389019	31388684	31389019	0	1	335	31388681
chr15	44956523	44956818	chr15:44956523-44956818	44956523	44956818	0	1	295	44956519
chr9	123914751	123914997	chr9:123914751-123914997	123914751	123914997	0	1	246	123914750
chr4	81714739	81715237	chr4:81714739-81715237	81714739	81715237	0	1	498	81714731
chr3	35452959	35453356	chr3:35452959-35453356	35452959	35453356	0	1	397	35452956
chr12	63098555	63098954	chr12:63098555-63098954	63098555	63098954	0	1	399	63098549
chr6	87900340	87900571	chr6:87900340-87900571	87900340	87900571	0	1	231	87900332
chr1	34573544	34573777	chr1:34573544-34573777	34573544	34573777	0	1	233	34573541
chr1	233128842	233129193	chr1:233128842-233129193	233128842	233129193	0	1	351	233128840
chr5	102179029	102179433	chr5:102179029-102179433	102179029	102179433	0	1	404	102179028
chr2	31708508	31708852	chr2:31708508-31708852	31708508	31708852	0	1	344	31708505
chr18	10195039	10195285	chr18:10195039-10195285	10195039	10195285	0	1	246	10195038
chr17	8527447	8527733	chr17:8527447-8527733	8527447	8527733	0	1	286	8527439
chr14	94733685	94733921	chr14:94733685-94733921	94733685	94733921	0	1	236	94733676
chr3	52573415	52573639	chr3:52573415-52573639	52573415	52573639	0	1	224	52573410
chr3	33900624	33900844	chr3:33900624-33900844	33900624	33900844	0	1	220	33900621
chr3	123747312	123747537	chr3:123747312-123747537	123747312	123747537	0	1	225	123747311
chr12	129990640	129990883	chr12:129990640-129990883	129990640	129990883	0	1	243	129990639
chr20	21226811	21227029	chr20:21226811-21227029	21226811	21227029	0	1	218	21226809
chr10	44070353	44070680	chr10:44070353-44070680	44070353	44070680	0	1	327	44070349
chr14	96761221	96761462	chr14:96761221-96761462	96761221	96761462	0	1	241	96761212
chr2	214461608	214461882	chr2:214461608-214461882	214461608	214461882	0	1	274	214461606
chr7	153827799	153828221	chr7:153827799-153828221	153827799	153828221	0	1	422	153827798
chr6	961453	961697	chr6:961453-961697	961453	961697	0	1	244	961444
chr5	178805739	178805991	chr5:178805739-178805991	178805739	178805991	0	1	252	178805738
chr18	76085244	76085677	chr18:76085244-76085677	76085244	76085677	0	1	433	76085237
chr14	22670569	22670849	chr14:22670569-22670849	22670569	22670849	0	1	280	22670567
chr8	72662247	72662462	chr8:72662247-72662462	72662247	72662462	0	1	215	72662240
chr3	104098562	104099007	chr3:104098562-104099007	104098562	104099007	0	1	445	104098561
chr13	98871728	98871977	chr13:98871728-98871977	98871728	98871977	0	1	249	98871719
chr4	97452407	97452758	chr4:97452407-97452758	97452407	97452758	0	1	351	97452398
chr21	10582814	10583095	chr21:10582814-10583095	10582814	10583095	0	1	281	10582813
chr6	101339825	101340050	chr6:101339825-101340050	101339825	101340050	0	1	225	101339824
chr1	169862702	169863010	chr1:169862702-169863010	169862702	169863010	0	1	308	169862701
chrX	99796300	99796678	chrX:99796300-99796678	99796300	99796678	0	1	378	99796291
chr3	145684524	145685219	chr3:145684524-145685219	145684524	145685219	0	1	695	145684523
chrX	5907320	5907534	chrX:5907320-5907534	5907320	5907534	0	1	214	5907315
chr10	2256262	2256656	chr10:2256262-2256656	2256262	2256656	0	1	394	2256260
chr10	52314279	52314598	chr10:52314279-52314598	52314279	52314598	0	1	319	52314274
chr4	173556931	173557395	chr4:173556931-173557395	173556931	173557395	0	1	464	173556930
chr10	89898780	89899247	chr10:89898780-89899247	89898780	89899247	0	1	467	89898772
chrX	153372934	153373232	chrX:153372934-153373232	153372934	153373232	0	1	298	153372933
chr4	141942770	141943431	chr4:141942770-141943431	141942770	141943431	0	1	661	141942769
chr9	87502164	87502428	chr9:87502164-87502428	87502164	87502428	0	1	264	87502156
chrX	82240802	82241081	chrX:82240802-82241081	82240802	82241081	0	1	279	82240794
chr12	128052769	128053240	chr12:128052769-128053240	128052769	128053240	0	1	471	128052768
chr9	915493	915711	chr9:915493-915711	915493	915711	0	1	218	915484
chr4	72212875	72213143	chr4:72212875-72213143	72212875	72213143	0	1	268	72212868
chr2	163017416	163018020	chr2:163017416-163018020	163017416	163018020	0	1	604	163017415
chr13	35251092	35251440	chr13:35251092-35251440	35251092	35251440	0	1	348	35251089
chr1	144101413	144101872	chr1:144101413-144101872	144101413	144101872	0	1	459	144101412
chr14	38321075	38321326	chr14:38321075-38321326	38321075	38321326	0	1	251	38321072
chr20	16294571	16294954	chr20:16294571-16294954	16294571	16294954	0	1	383	16294570
chr17	61283628	61284005	chr17:61283628-61284005	61283628	61284005	0	1	377	61283622
chr8	116938256	116938469	chr8:116938256-116938469	116938256	116938469	0	1	213	116938255
chr11	94599628	94600006	chr11:94599628-94600006	94599628	94600006	0	1	378	94599619
chr3	143700701	143700967	chr3:143700701-143700967	143700701	143700967	0	1	266	143700700
chr5	143812592	143812999	chr5:143812592-143812999	143812592	143812999	0	1	407	143812591
chr4	185599893	185600172	chr4:185599893-185600172	185599893	185600172	0	1	279	185599892
chr8	98089205	98089519	chr8:98089205-98089519	98089205	98089519	0	1	314	98089196
chr7	68300004	68300288	chr7:68300004-68300288	68300004	68300288	0	1	284	68299998
chr18	65383820	65384078	chr18:65383820-65384078	65383820	65384078	0	1	258	65383814
chr3	1757325	1757567	chr3:1757325-1757567	1757325	1757567	0	1	242	1757324
chr2	186223974	186224202	chr2:186223974-186224202	186223974	186224202	0	1	228	186223973
chr4	109394179	109394400	chr4:109394179-109394400	109394179	109394400	0	1	221	109394178
chr3	103602876	103603114	chr3:103602876-103603114	103602876	103603114	0	1	238	103602875
chr13	96517172	96517455	chr13:96517172-96517455	96517172	96517455	0	1	283	96517163
chr17	56510605	56510885	chr17:56510605-56510885	56510605	56510885	0	1	280	56510600
chr18	25380066	25380424	chr18:25380066-25380424	25380066	25380424	0	1	358	25380064
chr6	160634847	160635078	chr6:160634847-160635078	160634847	160635078	0	1	231	160634846
chr2	124960909	124961251	chr2:124960909-124961251	124960909	124961251	0	1	342	124960908
chr4	166980326	166980576	chr4:166980326-166980576	166980326	166980576	0	1	250	166980325
chr4	97435033	97435425	chr4:97435033-97435425	97435033	97435425	0	1	392	97435024
chr2	33379298	33379579	chr2:33379298-33379579	33379298	33379579	0	1	281	33379295
chr8	131531813	131532143	chr8:131531813-131532143	131531813	131532143	0	1	330	131531812
chr5	11433501	11433745	chr5:11433501-11433745	11433501	11433745	0	1	244	11433500
chr9	32433134	32433500	chr9:32433134-32433500	32433134	32433500	0	1	366	32433131
chr4	163004985	163005271	chr4:163004985-163005271	163004985	163005271	0	1	286	163004984
chr2	387951	388166	chr2:387951-388166	387951	388166	0	1	215	387948
chr1	69312256	69312640	chr1:69312256-69312640	69312256	69312640	0	1	384	69312250
chr3	121181499	121181748	chr3:121181499-121181748	121181499	121181748	0	1	249	121181498
chr8	96082949	96083176	chr8:96082949-96083176	96082949	96083176	0	1	227	96082940
chr11	15407748	15407962	chr11:15407748-15407962	15407748	15407962	0	1	214	15407747
chr3	81358363	81358586	chr3:81358363-81358586	81358363	81358586	0	1	223	81358355
chr11	122897068	122897292	chr11:122897068-122897292	122897068	122897292	0	1	224	122897067
chr4	122102886	122103213	chr4:122102886-122103213	122102886	122103213	0	1	327	122102885
chr3	68847379	68847764	chr3:68847379-68847764	68847379	68847764	0	1	385	68847373
chr3	62094752	62095057	chr3:62094752-62095057	62094752	62095057	0	1	305	62094746
chr3	32033889	32034162	chr3:32033889-32034162	32033889	32034162	0	1	273	32033886
chr18	66679628	66679865	chr18:66679628-66679865	66679628	66679865	0	1	237	66679622
chr6	39575578	39575821	chr6:39575578-39575821	39575578	39575821	0	1	243	39575575
chr18	36495676	36495903	chr18:36495676-36495903	36495676	36495903	0	1	227	36495673
chrX	11723784	11723999	chrX:11723784-11723999	11723784	11723999	0	1	215	11723783
chr15	79144136	79144445	chr15:79144136-79144445	79144136	79144445	0	1	309	79144129
chrX	77282877	77283233	chrX:77282877-77283233	77282877	77283233	0	1	356	77282870
chr2	153328788	153329128	chr2:153328788-153329128	153328788	153329128	0	1	340	153328787
chr7	153239353	153239590	chr7:153239353-153239590	153239353	153239590	0	1	237	153239352
chr8	82578859	82579305	chr8:82578859-82579305	82578859	82579305	0	1	446	82578851
chr13	62446070	62446358	chr13:62446070-62446358	62446070	62446358	0	1	288	62446064
chr8	92165469	92165748	chr8:92165469-92165748	92165469	92165748	0	1	279	92165460
chr7	64897309	64897548	chr7:64897309-64897548	64897309	64897548	0	1	239	64897303
chr4	59018300	59018600	chr4:59018300-59018600	59018300	59018600	0	1	300	59018295
chr4	37150211	37150623	chr4:37150211-37150623	37150211	37150623	0	1	412	37150208
chrX	56538098	56538323	chrX:56538098-56538323	56538098	56538323	0	1	225	56538093
chr3	163303544	163303781	chr3:163303544-163303781	163303544	163303781	0	1	237	163303543
chr9	111166224	111166677	chr9:111166224-111166677	111166224	111166677	0	1	453	111166223
chr8	75168936	75169223	chr8:75168936-75169223	75168936	75169223	0	1	287	75168929
chrX	106138712	106139015	chrX:106138712-106139015	106138712	106139015	0	1	303	106138711
chr7	115162878	115163268	chr7:115162878-115163268	115162878	115163268	0	1	390	115162877
chr3	56173404	56173617	chr3:56173404-56173617	56173404	56173617	0	1	213	56173399
chr13	31653144	31653409	chr13:31653144-31653409	31653144	31653409	0	1	265	31653141
chr9	38462094	38462435	chr9:38462094-38462435	38462094	38462435	0	1	341	38462091
chrX	23363150	23363387	chrX:23363150-23363387	23363150	23363387	0	1	237	23363148
chr6	88789131	88789352	chr6:88789131-88789352	88789131	88789352	0	1	221	88789123
chrX	56673882	56674262	chrX:56673882-56674262	56673882	56674262	0	1	380	56673877
chr8	83312945	83313373	chr8:83312945-83313373	83312945	83313373	0	1	428	83312937
chr11	37145426	37145703	chr11:37145426-37145703	37145426	37145703	0	1	277	37145423
chr2	163241389	163241616	chr2:163241389-163241616	163241389	163241616	0	1	227	163241388
chr5	175067412	175067627	chr5:175067412-175067627	175067412	175067627	0	1	215	175067411
chr18	45094042	45094393	chr18:45094042-45094393	45094042	45094393	0	1	351	45094038
chr6	62802989	62803409	chr6:62802989-62803409	62802989	62803409	0	1	420	62802983
chr3	104031124	104031581	chr3:104031124-104031581	104031124	104031581	0	1	457	104031123
chr16	79917829	79918175	chr16:79917829-79918175	79917829	79918175	0	1	346	79917822
chr3	29985431	29985753	chr3:29985431-29985753	29985431	29985753	0	1	322	29985429
chr7	53632954	53633209	chr7:53632954-53633209	53632954	53633209	0	1	255	53632949
chr6	74684901	74685317	chr6:74684901-74685317	74684901	74685317	0	1	416	74684894
chrX	104205918	104206269	chrX:104205918-104206269	104205918	104206269	0	1	351	104205917
chr13	74610520	74611187	chr13:74610520-74611187	74610520	74611187	0	1	667	74610513
chr2	177629027	177629380	chr2:177629027-177629380	177629027	177629380	0	1	353	177629026
chrX	118039238	118039530	chrX:118039238-118039530	118039238	118039530	0	1	292	118039237
chr4	136009233	136009579	chr4:136009233-136009579	136009233	136009579	0	1	346	136009232
chrX	7840484	7840828	chrX:7840484-7840828	7840484	7840828	0	1	344	7840477
chr5	114609442	114609847	chr5:114609442-114609847	114609442	114609847	0	1	405	114609441
chr4	70531563	70531887	chr4:70531563-70531887	70531563	70531887	0	1	324	70531556
chr5	101806409	101806634	chr5:101806409-101806634	101806409	101806634	0	1	225	101806408
chr3	63132725	63132987	chr3:63132725-63132987	63132725	63132987	0	1	262	63132719
chr5	108748459	108748685	chr5:108748459-108748685	108748459	108748685	0	1	226	108748458
chr1	73205070	73205506	chr1:73205070-73205506	73205070	73205506	0	1	436	73205063
chr1	227828795	227829141	chr1:227828795-227829141	227828795	227829141	0	1	346	227828793
chr8	4870691	4871039	chr8:4870691-4871039	4870691	4871039	0	1	348	4870687
chr5	41882867	41883266	chr5:41882867-41883266	41882867	41883266	0	1	399	41882863
chr2	90064647	90065080	chr2:90064647-90065080	90064647	90065080	0	1	433	90064638
chr8	81923447	81923876	chr8:81923447-81923876	81923447	81923876	0	1	429	81923439
chr9	9778200	9778420	chr9:9778200-9778420	9778200	9778420	0	1	220	9778191
chr5	39066083	39066356	chr5:39066083-39066356	39066083	39066356	0	1	273	39066080
chr7	38968067	38968328	chr7:38968067-38968328	38968067	38968328	0	1	261	38968064
chr3	86093302	86093529	chr3:86093302-86093529	86093302	86093529	0	1	227	86093294
chr5	94429747	94430104	chr5:94429747-94430104	94429747	94430104	0	1	357	94429738
chr9	90349363	90349599	chr9:90349363-90349599	90349363	90349599	0	1	236	90349354
chr14	41185700	41186117	chr14:41185700-41186117	41185700	41186117	0	1	417	41185696
chr12	72507790	72508254	chr12:72507790-72508254	72507790	72508254	0	1	464	72507783
chr5	128765747	128766007	chr5:128765747-128766007	128765747	128766007	0	1	260	128765746
chr7	53861827	53862152	chr7:53861827-53862152	53861827	53862152	0	1	325	53861822
chr1	215182120	215182509	chr1:215182120-215182509	215182120	215182509	0	1	389	215182118
chr4	160543864	160544209	chr4:160543864-160544209	160543864	160544209	0	1	345	160543863
chr12	21589890	21590188	chr12:21589890-21590188	21589890	21590188	0	1	298	21589888
chr6	74183061	74183279	chr6:74183061-74183279	74183061	74183279	0	1	218	74183054
chr17	52709802	52710390	chr17:52709802-52710390	52709802	52710390	0	1	588	52709797
chr5	13218384	13218707	chr5:13218384-13218707	13218384	13218707	0	1	323	13218383
chr7	78256133	78256545	chr7:78256133-78256545	78256133	78256545	0	1	412	78256126
chr3	76293816	76294285	chr3:76293816-76294285	76293816	76294285	0	1	469	76293809
chr2	209830632	209830872	chr2:209830632-209830872	209830632	209830872	0	1	240	209830630
chrX	66126855	66127075	chrX:66126855-66127075	66126855	66127075	0	1	220	66126849
chr6	145472398	145472720	chr6:145472398-145472720	145472398	145472720	0	1	322	145472397
chr1	195359797	195360011	chr1:195359797-195360011	195359797	195360011	0	1	214	195359796
chr17	54612650	54613091	chr17:54612650-54613091	54612650	54613091	0	1	441	54612645
chr12	69186968	69187204	chr12:69186968-69187204	69186968	69187204	0	1	236	69186962
chr17	8810942	8811365	chr17:8810942-8811365	8810942	8811365	0	1	423	8810934
chr18	62047271	62047569	chr18:62047271-62047569	62047271	62047569	0	1	298	62047265
chr3	152646941	152647261	chr3:152646941-152647261	152646941	152647261	0	1	320	152646940
chrX	38400507	38400723	chrX:38400507-38400723	38400507	38400723	0	1	216	38400504
chr5	76069396	76069622	chr5:76069396-76069622	76069396	76069622	0	1	226	76069389
chr11	41056859	41057092	chr11:41056859-41057092	41056859	41057092	0	1	233	41056855
chr8	136370301	136370517	chr8:136370301-136370517	136370301	136370517	0	1	216	136370300
chr4	162814174	162814387	chr4:162814174-162814387	162814174	162814387	0	1	213	162814173
chr13	66646817	66647293	chr13:66646817-66647293	66646817	66647293	0	1	476	66646811
chr7	113988949	113989197	chr7:113988949-113989197	113988949	113989197	0	1	248	113988948
chr4	136519728	136520041	chr4:136519728-136520041	136519728	136520041	0	1	313	136519727
chr12	61023231	61023453	chr12:61023231-61023453	61023231	61023453	0	1	222	61023225
chr3	176345374	176345664	chr3:176345374-176345664	176345374	176345664	0	1	290	176345373
chrX	36043728	36044216	chrX:36043728-36044216	36043728	36044216	0	1	488	36043725
chr4	163011097	163011497	chr4:163011097-163011497	163011097	163011497	0	1	400	163011096
chr6	133677293	133677545	chr6:133677293-133677545	133677293	133677545	0	1	252	133677292
chr18	70902803	70903020	chr18:70902803-70903020	70902803	70903020	0	1	217	70902796
chrX	32851715	32852370	chrX:32851715-32852370	32851715	32852370	0	1	655	32851712
chr21	19413105	19413420	chr21:19413105-19413420	19413105	19413420	0	1	315	19413104
chr9	119897657	119897944	chr9:119897657-119897944	119897657	119897944	0	1	287	119897656
chr4	12301861	12302174	chr4:12301861-12302174	12301861	12302174	0	1	313	12301860
chr7	21358046	21358286	chr7:21358046-21358286	21358046	21358286	0	1	240	21358044
chr4	177081425	177081736	chr4:177081425-177081736	177081425	177081736	0	1	311	177081424
chrX	113171922	113172136	chrX:113171922-113172136	113171922	113172136	0	1	214	113171921
chr3	163422882	163423098	chr3:163422882-163423098	163422882	163423098	0	1	216	163422881
chr3	163125784	163126148	chr3:163125784-163126148	163125784	163126148	0	1	364	163125783
chr3	8785057	8785299	chr3:8785057-8785299	8785057	8785299	0	1	242	8785049
chr12	55034379	55034602	chr12:55034379-55034602	55034379	55034602	0	1	223	55034374
chrX	141002431	141002721	chrX:141002431-141002721	141002431	141002721	0	1	290	141002430
chrX	76625574	76625931	chrX:76625574-76625931	76625574	76625931	0	1	357	76625567
chr11	39652180	39652398	chr11:39652180-39652398	39652180	39652398	0	1	218	39652177
chr4	157389028	157389304	chr4:157389028-157389304	157389028	157389304	0	1	276	157389027
chr1	95944952	95945200	chr1:95944952-95945200	95944952	95945200	0	1	248	95944943
chr4	36574313	36574563	chr4:36574313-36574563	36574313	36574563	0	1	250	36574310
chr13	86409879	86410101	chr13:86409879-86410101	86409879	86410101	0	1	222	86409871
chr10	67737986	67738292	chr10:67737986-67738292	67737986	67738292	0	1	306	67737980
chr12	81083523	81083768	chr12:81083523-81083768	81083523	81083768	0	1	245	81083515
chr3	690592	690859	chr3:690592-690859	690592	690859	0	1	267	690586
chr4	177899674	177900062	chr4:177899674-177900062	177899674	177900062	0	1	388	177899673
chr6	102958982	102959392	chr6:102958982-102959392	102958982	102959392	0	1	410	102958981
chr11	16248377	16248633	chr11:16248377-16248633	16248377	16248633	0	1	256	16248376
chr1	66614967	66615343	chr1:66614967-66615343	66614967	66615343	0	1	376	66614961
chr4	52504564	52504860	chr4:52504564-52504860	52504564	52504860	0	1	296	52504559
chr6	48979219	48979448	chr6:48979219-48979448	48979219	48979448	0	1	229	48979215
chr10	53992143	53992409	chr10:53992143-53992409	53992143	53992409	0	1	266	53992138
chr4	44415611	44415845	chr4:44415611-44415845	44415611	44415845	0	1	234	44415607
chr5	117013633	117014040	chr5:117013633-117014040	117013633	117014040	0	1	407	117013632
chr3	78441852	78442114	chr3:78441852-78442114	78441852	78442114	0	1	262	78441845
chr18	53520103	53520322	chr18:53520103-53520322	53520103	53520322	0	1	219	53520098
chrX	96296348	96296626	chrX:96296348-96296626	96296348	96296626	0	1	278	96296339
chr4	143704692	143705083	chr4:143704692-143705083	143704692	143705083	0	1	391	143704691
chr11	29560028	29560256	chr11:29560028-29560256	29560028	29560256	0	1	228	29560026
chr6	78016140	78016413	chr6:78016140-78016413	78016140	78016413	0	1	273	78016133
chr6	115464009	115464536	chr6:115464009-115464536	115464009	115464536	0	1	527	115464008
chr7	15839506	15839945	chr7:15839506-15839945	15839506	15839945	0	1	439	15839505
chrX	145343711	145344049	chrX:145343711-145344049	145343711	145344049	0	1	338	145343710
chr1	104458282	104458697	chr1:104458282-104458697	104458282	104458697	0	1	415	104458281
chr18	33301128	33301381	chr18:33301128-33301381	33301128	33301381	0	1	253	33301125
chr1	91999904	92000263	chr1:91999904-92000263	91999904	92000263	0	1	359	91999895
chr5	28886752	28887087	chr5:28886752-28887087	28886752	28887087	0	1	335	28886750
chr5	50292753	50293170	chr5:50292753-50293170	50292753	50293170	0	1	417	50292748
chr18	61320717	61321001	chr18:61320717-61321001	61320717	61321001	0	1	284	61320711
chr11	26983731	26984019	chr11:26983731-26984019	26983731	26984019	0	1	288	26983729
chr1	49787163	49787489	chr1:49787163-49787489	49787163	49787489	0	1	326	49787159
chr7	11478234	11478461	chr7:11478234-11478461	11478234	11478461	0	1	227	11478233
chrX	90040865	90041119	chrX:90040865-90041119	90040865	90041119	0	1	254	90040856
chr10	107899047	107899466	chr10:107899047-107899466	107899047	107899466	0	1	419	107899046
chr3	76102942	76103156	chr3:76102942-76103156	76102942	76103156	0	1	214	76102935
chrX	90012630	90013062	chrX:90012630-90013062	90012630	90013062	0	1	432	90012621
chr9	11077367	11077676	chr9:11077367-11077676	11077367	11077676	0	1	309	11077366
chr5	87488120	87488638	chr5:87488120-87488638	87488120	87488638	0	1	518	87488112
chr1	215011533	215011952	chr1:215011533-215011952	215011533	215011952	0	1	419	215011531
chr4	34009407	34009623	chr4:34009407-34009623	34009407	34009623	0	1	216	34009404
chr2	184116297	184116531	chr2:184116297-184116531	184116297	184116531	0	1	234	184116296
chr1	65752225	65752538	chr1:65752225-65752538	65752225	65752538	0	1	313	65752219
chr14	41825121	41825424	chr14:41825121-41825424	41825121	41825424	0	1	303	41825117
chr14	62029153	62029445	chr14:62029153-62029445	62029153	62029445	0	1	292	62029147
chr10	64618763	64618986	chr10:64618763-64618986	64618763	64618986	0	1	223	64618757
chr13	83516734	83516993	chr13:83516734-83516993	83516734	83516993	0	1	259	83516726
chr8	115125178	115125415	chr8:115125178-115125415	115125178	115125415	0	1	237	115125177
chr7	138110338	138110651	chr7:138110338-138110651	138110338	138110651	0	1	313	138110337
chr1	104878494	104879005	chr1:104878494-104879005	104878494	104879005	0	1	511	104878493
chr13	78845299	78845589	chr13:78845299-78845589	78845299	78845589	0	1	290	78845292
chr13	93132153	93132401	chr13:93132153-93132401	93132153	93132401	0	1	248	93132144
chrX	84907910	84908153	chrX:84907910-84908153	84907910	84908153	0	1	243	84907902
chr2	221724460	221724695	chr2:221724460-221724695	221724460	221724695	0	1	235	221724458
chr4	34388981	34389326	chr4:34388981-34389326	34388981	34389326	0	1	345	34388978
chr11	55297940	55298212	chr11:55297940-55298212	55297940	55298212	0	1	272	55297935
chr5	63668026	63668243	chr5:63668026-63668243	63668026	63668243	0	1	217	63668020
chr4	29295670	29295962	chr4:29295670-29295962	29295670	29295962	0	1	292	29295668
chr3	191697219	191697461	chr3:191697219-191697461	191697219	191697461	0	1	242	191697218
chr14	40570798	40571082	chr14:40570798-40571082	40570798	40571082	0	1	284	40570794
chr12	52518562	52519486	chr12:52518562-52519486	52518562	52519486	0	1	924	52518557
chr12	52516500	52517628	chr12:52516500-52517628	52516500	52517628	0	1	1128	52516495
chr4	2942415	2942640	chr4:2942415-2942640	2942415	2942640	0	1	225	2942413
chr16	3022874	3023088	chr16:3022874-3023088	3022874	3023088	0	1	214	3022871
chr15	39581715	39582919	chr15:39581715-39582919	39581715	39582919	0	1	1204	39581712
chr15	39581058	39581506	chr15:39581058-39581506	39581058	39581506	0	1	448	39581055
chr17	41620447	41621833	chr17:41620447-41621833	41620447	41621833	0	1	1386	41620443
chr17	41581524	41581851	chr17:41581524-41581851	41581524	41581851	0	1	327	41581520
chr6	351192	351391	chr6:351192-351391	351192	351391	0	1	199	351189
chr1	16616389	16616734	chr1:16616389-16616734	16616389	16616734	0	1	345	16616388
chr17	40473607	40475966	chr17:40473607-40475966	40473607	40475966	0	1	2359	40473603
chr1	179086917	179087178	chr1:179086917-179087178	179086917	179087178	0	1	261	179086916
chr4	49513360	49513765	chr4:49513360-49513765	49513360	49513765	0	1	405	49513356
chr1	155438157	155439073	chr1:155438157-155439073	155438157	155439073	0	1	916	155438156
chr19	49856722	49856928	chr19:49856722-49856928	49856722	49856928	0	1	206	49856718
chr17	75762527	75763714	chr17:75762527-75763714	75762527	75763714	0	1	1187	75762520
chr17	75761805	75762176	chr17:75761805-75762176	75761805	75762176	0	1	371	75761798
chr17	8186745	8187755	chr17:8186745-8187755	8186745	8187755	0	1	1010	8186737
chr17	41579635	41580641	chr17:41579635-41580641	41579635	41580641	0	1	1006	41579631
chr15	45201075	45201355	chr15:45201075-45201355	45201075	45201355	0	1	280	45201071
chr17	41584226	41585967	chr17:41584226-41585967	41584226	41585967	0	1	1741	41584222
chr11	838758	839453	chr11:838758-839453	838758	839453	0	1	695	838750
chr19	49855347	49855977	chr19:49855347-49855977	49855347	49855977	0	1	630	49855343
chr17	40472138	40472501	chr17:40472138-40472501	40472138	40472501	0	1	363	40472134
chr6	36679292	36680737	chr6:36679292-36680737	36679292	36680737	0	1	1445	36679289
chr1	209612706	209613242	chr1:209612706-209613242	209612706	209613242	0	1	536	209612704
chr15	39588141	39588788	chr15:39588141-39588788	39588141	39588788	0	1	647	39588138
chr7	5525649	5526606	chr7:5525649-5526606	5525649	5526606	0	1	957	5525644
chr15	45198472	45198889	chr15:45198472-45198889	45198472	45198889	0	1	417	45198468
chr1	209611698	209612355	chr1:209611698-209612355	209611698	209612355	0	1	657	209611696
chr19	10113137	10113402	chr19:10113137-10113402	10113137	10113402	0	1	265	10113136
chr15	39587280	39587608	chr15:39587280-39587608	39587280	39587608	0	1	328	39587277
chr2	43225976	43226572	chr2:43225976-43226572	43225976	43226572	0	1	596	43225972
chr17	39153563	39153917	chr17:39153563-39153917	39153563	39153917	0	1	354	39153560
chr16	89564725	89565402	chr16:89564725-89565402	89564725	89565402	0	1	677	89564717
chr1	153563805	153564366	chr1:153563805-153564366	153563805	153564366	0	1	561	153563804
chr12	52513793	52513990	chr12:52513793-52513990	52513793	52513990	0	1	197	52513788
chr1	146035569	146035874	chr1:146035569-146035874	146035569	146035874	0	1	305	146035568
chr22	41526318	41527068	chr22:41526318-41527068	41526318	41527068	0	1	750	41526314
chr17	8221405	8221703	chr17:8221405-8221703	8221405	8221703	0	1	298	8221397
chr6	327383	327701	chr6:327383-327701	327383	327701	0	1	318	327380
chr17	41624123	41624599	chr17:41624123-41624599	41624123	41624599	0	1	476	41624119
chr3	52055906	52056218	chr3:52055906-52056218	52055906	52056218	0	1	312	52055901
chr3	52053899	52054795	chr3:52053899-52054795	52053899	52054795	0	1	896	52053894
chr3	49719368	49719844	chr3:49719368-49719844	49719368	49719844	0	1	476	49719364
chr1	44721563	44721887	chr1:44721563-44721887	44721563	44721887	0	1	324	44721559
chr16	57299791	57300705	chr16:57299791-57300705	57299791	57300705	0	1	914	57299786
chr10	72276023	72276333	chr10:72276023-72276333	72276023	72276333	0	1	310	72276016
chr1	209433384	209433661	chr1:209433384-209433661	209433384	209433661	0	1	277	209433382
chr15	39591281	39591498	chr15:39591281-39591498	39591281	39591498	0	1	217	39591278
chr8	143912552	143914088	chr8:143912552-143914088	143912552	143914088	0	1	1536	143912551
chr1	153533225	153533562	chr1:153533225-153533562	153533225	153533562	0	1	337	153533224
chr19	12793446	12794194	chr19:12793446-12794194	12793446	12794194	0	1	748	12793445
chr10	72274323	72274722	chr10:72274323-72274722	72274323	72274722	0	1	399	72274316
chr17	75034983	75035288	chr17:75034983-75035288	75034983	75035288	0	1	305	75034976
chr14	68792146	68792545	chr14:68792146-68792545	68792146	68792545	0	1	399	68792140
chr1	54270684	54271004	chr1:54270684-54271004	54270684	54271004	0	1	320	54270679
chr1	209429014	209429346	chr1:209429014-209429346	209429014	209429346	0	1	332	209429012
chr1	153564640	153565522	chr1:153564640-153565522	153564640	153565522	0	1	882	153564639
chr3	47848093	47848310	chr3:47848093-47848310	47848093	47848310	0	1	217	47848089
chr21	45074047	45075593	chr21:45074047-45075593	45074047	45075593	0	1	1546	45074043
chr10	73911154	73911841	chr10:73911154-73911841	73911154	73911841	0	1	687	73911147
chr22	22901794	22902049	chr22:22901794-22902049	22901794	22902049	0	1	255	22901792
chr1	43450036	43450267	chr1:43450036-43450267	43450036	43450267	0	1	231	43450032
chr5	181191560	181191823	chr5:181191560-181191823	181191560	181191823	0	1	263	181191559
chr16	89720621	89720959	chr16:89720621-89720959	89720621	89720959	0	1	338	89720613
chr17	41748217	41748676	chr17:41748217-41748676	41748217	41748676	0	1	459	41748213
chr19	41872428	41872679	chr19:41872428-41872679	41872428	41872679	0	1	251	41872424
chr19	4723909	4724260	chr19:4723909-4724260	4723909	4724260	0	1	351	4723905
chr1	153560586	153560878	chr1:153560586-153560878	153560586	153560878	0	1	292	153560585
chr12	56165400	56165639	chr12:56165400-56165639	56165400	56165639	0	1	239	56165395
chr17	8226588	8227136	chr17:8226588-8227136	8226588	8227136	0	1	548	8226580
chr1	209433966	209434432	chr1:209433966-209434432	209433966	209434432	0	1	466	209433964
chr19	48614798	48615208	chr19:48614798-48615208	48614798	48615208	0	1	410	48614794
chr16	14285770	14286095	chr16:14285770-14286095	14285770	14286095	0	1	325	14285769
chr19	2692285	2692606	chr19:2692285-2692606	2692285	2692606	0	1	321	2692283
chr12	76032267	76032469	chr12:76032267-76032469	76032267	76032469	0	1	202	76032260
chr10	3785448	3786210	chr10:3785448-3786210	3785448	3786210	0	1	762	3785445
chr5	181221744	181222567	chr5:181221744-181222567	181221744	181222567	0	1	823	181221743
chr19	58395577	58396047	chr19:58395577-58396047	58395577	58396047	0	1	470	58395572
chr16	85813381	85813721	chr16:85813381-85813721	85813381	85813721	0	1	340	85813373
chr16	66941633	66941853	chr16:66941633-66941853	66941633	66941853	0	1	220	66941627
chr22	31104711	31105120	chr22:31104711-31105120	31104711	31105120	0	1	409	31104708
chr1	180918723	180919195	chr1:180918723-180919195	180918723	180919195	0	1	472	180918722
chr17	82494660	82494865	chr17:82494660-82494865	82494660	82494865	0	1	205	82494652
chr9	125377698	125378016	chr9:125377698-125378016	125377698	125378016	0	1	318	125377697
chr12	6871108	6871310	chr12:6871108-6871310	6871108	6871310	0	1	202	6871102
chr14	77925090	77925498	chr14:77925090-77925498	77925090	77925498	0	1	408	77925083
chr22	30881563	30881772	chr22:30881563-30881772	30881563	30881772	0	1	209	30881560
chr12	6538706	6539430	chr12:6538706-6539430	6538706	6539430	0	1	724	6538700
chr17	79127903	79128102	chr17:79127903-79128102	79127903	79128102	0	1	199	79127896
chr16	87722450	87722724	chr16:87722450-87722724	87722450	87722724	0	1	274	87722442
chr15	65324113	65324442	chr15:65324113-65324442	65324113	65324442	0	1	329	65324107
chr17	50055295	50056224	chr17:50055295-50056224	50055295	50056224	0	1	929	50055290
chr19	39409480	39409758	chr19:39409480-39409758	39409480	39409758	0	1	278	39409477
chr16	56610074	56610364	chr16:56610074-56610364	56610074	56610364	0	1	290	56610069
chr16	1782169	1782405	chr16:1782169-1782405	1782169	1782405	0	1	236	1782168
chr6	158625943	158626248	chr6:158625943-158626248	158625943	158626248	0	1	305	158625942
chr11	64893641	64893887	chr11:64893641-64893887	64893641	64893887	0	1	246	64893635
chr9	130519229	130519588	chr9:130519229-130519588	130519229	130519588	0	1	359	130519228
chr12	120291730	120292039	chr12:120291730-120292039	120291730	120292039	0	1	309	120291729
chr16	1961227	1961901	chr16:1961227-1961901	1961227	1961901	0	1	674	1961226
chr15	72170637	72170834	chr15:72170637-72170834	72170637	72170834	0	1	197	72170630
chr16	3152811	3153014	chr16:3152811-3153014	3152811	3153014	0	1	203	3152808
chr1	11455906	11456104	chr1:11455906-11456104	11455906	11456104	0	1	198	11455905
chr1	51340329	51340573	chr1:51340329-51340573	51340329	51340573	0	1	244	51340324
chr9	129002855	129003206	chr9:129002855-129003206	129002855	129003206	0	1	351	129002854
chr12	124927785	124928017	chr12:124927785-124928017	124927785	124928017	0	1	232	124927784
chr6	35473129	35473618	chr6:35473129-35473618	35473129	35473618	0	1	489	35473126
chr1	11908461	11908712	chr1:11908461-11908712	11908461	11908712	0	1	251	11908460
chr14	68790317	68790726	chr14:68790317-68790726	68790317	68790726	0	1	409	68790311
chr1	209428238	209428436	chr1:209428238-209428436	209428238	209428436	0	1	198	209428236
chr11	76235466	76236047	chr11:76235466-76236047	76235466	76236047	0	1	581	76235459
chr5	181207678	181207886	chr5:181207678-181207886	181207678	181207886	0	1	208	181207677
chr20	36211063	36211386	chr20:36211063-36211386	36211063	36211386	0	1	323	36211060
chr11	65126574	65126845	chr11:65126574-65126845	65126574	65126845	0	1	271	65126568
chr17	5225612	5225819	chr17:5225612-5225819	5225612	5225819	0	1	207	5225607
chr11	64523753	64523994	chr11:64523753-64523994	64523753	64523994	0	1	241	64523747
chr15	72197903	72198156	chr15:72197903-72198156	72197903	72198156	0	1	253	72197896
chr3	13699051	13699257	chr3:13699051-13699257	13699051	13699257	0	1	206	13699050
chr1	44819601	44819868	chr1:44819601-44819868	44819601	44819868	0	1	267	44819597
chr1	148264674	148265097	chr1:148264674-148265097	148264674	148265097	0	1	423	148264673
chr16	3184049	3184325	chr16:3184049-3184325	3184049	3184325	0	1	276	3184046
chr17	75610672	75611037	chr17:75610672-75611037	75610672	75611037	0	1	365	75610665
chr2	25927050	25927387	chr2:25927050-25927387	25927050	25927387	0	1	337	25927048
chr3	49533062	49533315	chr3:49533062-49533315	49533062	49533315	0	1	253	49533058
chr22	29169738	29169946	chr22:29169738-29169946	29169738	29169946	0	1	208	29169736
chr12	122185673	122185953	chr12:122185673-122185953	122185673	122185953	0	1	280	122185672
chr3	10517669	10517875	chr3:10517669-10517875	10517669	10517875	0	1	206	10517668
chr2	109302460	109302699	chr2:109302460-109302699	109302460	109302699	0	1	239	109302459
chr19	32649451	32649672	chr19:32649451-32649672	32649451	32649672	0	1	221	32649448
chr7	4222685	4222942	chr7:4222685-4222942	4222685	4222942	0	1	257	4222681
chr14	22929593	22929842	chr14:22929593-22929842	22929593	22929842	0	1	249	22929591
chr16	88711227	88711451	chr16:88711227-88711451	88711227	88711451	0	1	224	88711219
chr2	100392726	100393102	chr2:100392726-100393102	100392726	100393102	0	1	376	100392725
chr12	2980771	2981005	chr12:2980771-2981005	2980771	2981005	0	1	234	2980769
chr10	124567137	124567373	chr10:124567137-124567373	124567137	124567373	0	1	236	124567136
chr17	21228366	21228634	chr17:21228366-21228634	21228366	21228634	0	1	268	21228364
chr17	8138770	8139067	chr17:8138770-8139067	8138770	8139067	0	1	297	8138762
chr4	3670394	3671008	chr4:3670394-3671008	3670394	3671008	0	1	614	3670391
chr17	17807593	17807835	chr17:17807593-17807835	17807593	17807835	0	1	242	17807592
chr8	66113218	66113569	chr8:66113218-66113569	66113218	66113569	0	1	351	66113212
chr1	244750276	244750543	chr1:244750276-244750543	244750276	244750543	0	1	267	244750274
chr6	27230419	27230741	chr6:27230419-27230741	27230419	27230741	0	1	322	27230417
chr16	67936345	67936545	chr16:67936345-67936545	67936345	67936545	0	1	200	67936339
chr14	67581070	67581332	chr14:67581070-67581332	67581070	67581332	0	1	262	67581064
chr7	129765872	129766080	chr7:129765872-129766080	129765872	129766080	0	1	208	129765871
chr2	43221947	43222286	chr2:43221947-43222286	43221947	43222286	0	1	339	43221943
chr2	235459893	235460177	chr2:235459893-235460177	235459893	235460177	0	1	284	235459891
chr1	25732274	25732565	chr1:25732274-25732565	25732274	25732565	0	1	291	25732272
chr18	48315963	48316220	chr18:48315963-48316220	48315963	48316220	0	1	257	48315959
chr2	121069059	121069262	chr2:121069059-121069262	121069059	121069262	0	1	203	121069058
chr14	20662939	20663415	chr14:20662939-20663415	20662939	20663415	0	1	476	20662937
chr3	139283488	139283766	chr3:139283488-139283766	139283488	139283766	0	1	278	139283487
chr22	37466064	37466428	chr22:37466064-37466428	37466064	37466428	0	1	364	37466061
chr19	5308852	5309365	chr19:5308852-5309365	5308852	5309365	0	1	513	5308847
chr10	124621029	124621306	chr10:124621029-124621306	124621029	124621306	0	1	277	124621028
chr12	124939531	124940120	chr12:124939531-124940120	124939531	124940120	0	1	589	124939530
chr8	141188073	141188270	chr8:141188073-141188270	141188073	141188270	0	1	197	141188072
chr1	44654764	44655033	chr1:44654764-44655033	44654764	44655033	0	1	269	44654760
chr6	26554059	26554285	chr6:26554059-26554285	26554059	26554285	0	1	226	26554057
chr11	66348064	66348364	chr11:66348064-66348364	66348064	66348364	0	1	300	66348058
chr16	636673	636903	chr16:636673-636903	636673	636903	0	1	230	636667
chr17	8125615	8126014	chr17:8125615-8126014	8125615	8126014	0	1	399	8125607
chr4	25097035	25097234	chr4:25097035-25097234	25097035	25097234	0	1	199	25097033
chr19	730115	730313	chr19:730115-730313	730115	730313	0	1	198	730108
chr20	50064473	50064722	chr20:50064473-50064722	50064473	50064722	0	1	249	50064468
chr17	7579634	7579845	chr17:7579634-7579845	7579634	7579845	0	1	211	7579627
chr16	3157332	3157619	chr16:3157332-3157619	3157332	3157619	0	1	287	3157329
chr8	66113954	66114253	chr8:66113954-66114253	66113954	66114253	0	1	299	66113948
chr3	14419455	14419766	chr3:14419455-14419766	14419455	14419766	0	1	311	14419454
chr16	3171940	3172404	chr16:3171940-3172404	3171940	3172404	0	1	464	3171937
chr8	486627	486831	chr8:486627-486831	486627	486831	0	1	204	486623
chr16	87383882	87384200	chr16:87383882-87384200	87383882	87384200	0	1	318	87383874
chr15	89334891	89335411	chr15:89334891-89335411	89334891	89335411	0	1	520	89334883
chr2	10438629	10439068	chr2:10438629-10439068	10438629	10439068	0	1	439	10438628
chr1	167714557	167714905	chr1:167714557-167714905	167714557	167714905	0	1	348	167714556
chr1	111198324	111198836	chr1:111198324-111198836	111198324	111198836	0	1	512	111198323
chr12	57154293	57154560	chr12:57154293-57154560	57154293	57154560	0	1	267	57154288
chr1	42924198	42924759	chr1:42924198-42924759	42924198	42924759	0	1	561	42924194
chr2	15781482	15781732	chr2:15781482-15781732	15781482	15781732	0	1	250	15781481
chr7	3091540	3091875	chr7:3091540-3091875	3091540	3091875	0	1	335	3091537
chr14	65014703	65015073	chr14:65014703-65015073	65014703	65015073	0	1	370	65014697
chr4	8344357	8344557	chr4:8344357-8344557	8344357	8344557	0	1	200	8344349
chr22	42662141	42662442	chr22:42662141-42662442	42662141	42662442	0	1	301	42662137
chr19	49222486	49222725	chr19:49222486-49222725	49222486	49222725	0	1	239	49222482
chr5	178337052	178337249	chr5:178337052-178337249	178337052	178337249	0	1	197	178337051
chr14	99557368	99557571	chr14:99557368-99557571	99557368	99557571	0	1	203	99557359
chr10	13200132	13200731	chr10:13200132-13200731	13200132	13200731	0	1	599	13200131
chr2	235582340	235582547	chr2:235582340-235582547	235582340	235582547	0	1	207	235582338
chr2	46237459	46237791	chr2:46237459-46237791	46237459	46237791	0	1	332	46237455
chr10	86180331	86180638	chr10:86180331-86180638	86180331	86180638	0	1	307	86180323
chr5	140388701	140388955	chr5:140388701-140388955	140388701	140388955	0	1	254	140388700
chr19	10049918	10050156	chr19:10049918-10050156	10049918	10050156	0	1	238	10049917
chr19	44539494	44539851	chr19:44539494-44539851	44539494	44539851	0	1	357	44539490
chr19	49647408	49647744	chr19:49647408-49647744	49647408	49647744	0	1	336	49647404
chr16	71426421	71426684	chr16:71426421-71426684	71426421	71426684	0	1	263	71426414
chr4	6533547	6533756	chr4:6533547-6533756	6533547	6533756	0	1	209	6533541
chr9	126109801	126110017	chr9:126109801-126110017	126109801	126110017	0	1	216	126109800
chr2	218406361	218406653	chr2:218406361-218406653	218406361	218406653	0	1	292	218406359
chr10	119506708	119507279	chr10:119506708-119507279	119506708	119507279	0	1	571	119506707
chr15	100845052	100845251	chr15:100845052-100845251	100845052	100845251	0	1	199	100845051
chr12	54131923	54132345	chr12:54131923-54132345	54131923	54132345	0	1	422	54131918
chr14	100767958	100768361	chr14:100767958-100768361	100767958	100768361	0	1	403	100767957
chr1	54125615	54126134	chr1:54125615-54126134	54125615	54126134	0	1	519	54125610
chr18	76148601	76148827	chr18:76148601-76148827	76148601	76148827	0	1	226	76148594
chr1	225463891	225464367	chr1:225463891-225464367	225463891	225464367	0	1	476	225463889
chr5	177443589	177443871	chr5:177443589-177443871	177443589	177443871	0	1	282	177443588
chr19	45279871	45280108	chr19:45279871-45280108	45279871	45280108	0	1	237	45279867
chr2	31174527	31174756	chr2:31174527-31174756	31174527	31174756	0	1	229	31174524
chr17	49191981	49192773	chr17:49191981-49192773	49191981	49192773	0	1	792	49191977
chr3	13689650	13689871	chr3:13689650-13689871	13689650	13689871	0	1	221	13689649
chr21	42452471	42452712	chr21:42452471-42452712	42452471	42452712	0	1	241	42452467
chr12	112209984	112210525	chr12:112209984-112210525	112209984	112210525	0	1	541	112209983
chr7	132309352	132309573	chr7:132309352-132309573	132309352	132309573	0	1	221	132309351
chr17	68019842	68020108	chr17:68019842-68020108	68019842	68020108	0	1	266	68019836
chr17	4914980	4915332	chr17:4914980-4915332	4914980	4915332	0	1	352	4914976
chr19	41954472	41954773	chr19:41954472-41954773	41954472	41954773	0	1	301	41954468
chrX	9843427	9843660	chrX:9843427-9843660	9843427	9843660	0	1	233	9843418
chr19	35124744	35124993	chr19:35124744-35124993	35124744	35124993	0	1	249	35124741
chr14	20657369	20657623	chr14:20657369-20657623	20657369	20657623	0	1	254	20657367
chr1	17921931	17922177	chr1:17921931-17922177	17921931	17922177	0	1	246	17921930
chr15	99404381	99404645	chr15:99404381-99404645	99404381	99404645	0	1	264	99404372
chr2	32839043	32839283	chr2:32839043-32839283	32839043	32839283	0	1	240	32839040
chr3	9631912	9632172	chr3:9631912-9632172	9631912	9632172	0	1	260	9631903
chr2	130336936	130337383	chr2:130336936-130337383	130336936	130337383	0	1	447	130336935
chr1	27665014	27665279	chr1:27665014-27665279	27665014	27665279	0	1	265	27665012
chr15	39593450	39593709	chr15:39593450-39593709	39593450	39593709	0	1	259	39593447
chr6	158700073	158700287	chr6:158700073-158700287	158700073	158700287	0	1	214	158700072
chr16	1713242	1713470	chr16:1713242-1713470	1713242	1713470	0	1	228	1713241
chr11	59550841	59551324	chr11:59550841-59551324	59550841	59551324	0	1	483	59550836
chr11	73363333	73363652	chr11:73363333-73363652	73363333	73363652	0	1	319	73363326
chr20	34568725	34568946	chr20:34568725-34568946	34568725	34568946	0	1	221	34568722
chr11	755660	755873	chr11:755660-755873	755660	755873	0	1	213	755653
chr9	129675863	129676087	chr9:129675863-129676087	129675863	129676087	0	1	224	129675862
chr6	27668485	27668797	chr6:27668485-27668797	27668485	27668797	0	1	312	27668483
chr17	77213638	77213908	chr17:77213638-77213908	77213638	77213908	0	1	270	77213631
chr4	6432094	6432301	chr4:6432094-6432301	6432094	6432301	0	1	207	6432088
chr2	231423261	231423461	chr2:231423261-231423461	231423261	231423461	0	1	200	231423259
chr8	141602499	141602761	chr8:141602499-141602761	141602499	141602761	0	1	262	141602498
chr14	23320960	23321895	chr14:23320960-23321895	23320960	23321895	0	1	935	23320958
chr1	55381556	55381924	chr1:55381556-55381924	55381556	55381924	0	1	368	55381551
chr10	97139626	97139843	chr10:97139626-97139843	97139626	97139843	0	1	217	97139617
chr10	129515032	129515316	chr10:129515032-129515316	129515032	129515316	0	1	284	129515031
chr1	16078184	16078479	chr1:16078184-16078479	16078184	16078479	0	1	295	16078183
chr19	12945777	12946038	chr19:12945777-12946038	12945777	12946038	0	1	261	12945776
chr20	3773027	3773228	chr20:3773027-3773228	3773027	3773228	0	1	201	3773024
chr4	188146747	188147011	chr4:188146747-188147011	188146747	188147011	0	1	264	188146746
chr18	57053070	57053326	chr18:57053070-57053326	57053070	57053326	0	1	256	57053065
chr5	5184233	5184438	chr5:5184233-5184438	5184233	5184438	0	1	205	5184228
chr14	94649996	94650243	chr14:94649996-94650243	94649996	94650243	0	1	247	94649987
chr10	125419851	125420105	chr10:125419851-125420105	125419851	125420105	0	1	254	125419850
chr12	116763456	116763653	chr12:116763456-116763653	116763456	116763653	0	1	197	116763455
chr9	137496850	137497313	chr9:137496850-137497313	137496850	137497313	0	1	463	137496849
chr10	97675511	97675793	chr10:97675511-97675793	97675511	97675793	0	1	282	97675502
chr10	131234961	131235166	chr10:131234961-131235166	131234961	131235166	0	1	205	131234960
chr17	17462519	17462891	chr17:17462519-17462891	17462519	17462891	0	1	372	17462518
chr18	23958007	23958472	chr18:23958007-23958472	23958007	23958472	0	1	465	23958005
chr2	121530748	121531369	chr2:121530748-121531369	121530748	121531369	0	1	621	121530747
chr17	27965018	27965361	chr17:27965018-27965361	27965018	27965361	0	1	343	27965016
chr1	93847515	93847823	chr1:93847515-93847823	93847515	93847823	0	1	308	93847506
chr1	13542957	13543225	chr1:13542957-13543225	13542957	13543225	0	1	268	13542956
chr20	47006066	47006267	chr20:47006066-47006267	47006066	47006267	0	1	201	47006062
chr21	42296384	42296681	chr21:42296384-42296681	42296384	42296681	0	1	297	42296380
chr5	150111357	150111647	chr5:150111357-150111647	150111357	150111647	0	1	290	150111356
chr12	926886	927163	chr12:926886-927163	926886	927163	0	1	277	926877
chr1	1411634	1412039	chr1:1411634-1412039	1411634	1412039	0	1	405	1411633
chr2	38481676	38482011	chr2:38481676-38482011	38481676	38482011	0	1	335	38481673
chr1	154961593	154962115	chr1:154961593-154962115	154961593	154962115	0	1	522	154961592
chr17	19508009	19508287	chr17:19508009-19508287	19508009	19508287	0	1	278	19508008
chr1	28577403	28577628	chr1:28577403-28577628	28577403	28577628	0	1	225	28577401
chr16	73482116	73482397	chr16:73482116-73482397	73482116	73482397	0	1	281	73482109
chr5	160278661	160279089	chr5:160278661-160279089	160278661	160279089	0	1	428	160278660
chr7	50613461	50613723	chr7:50613461-50613723	50613461	50613723	0	1	262	50613456
chr11	10307433	10308112	chr11:10307433-10308112	10307433	10308112	0	1	679	10307432
chr5	173766794	173767072	chr5:173766794-173767072	173766794	173767072	0	1	278	173766793
chr12	108150535	108150806	chr12:108150535-108150806	108150535	108150806	0	1	271	108150534
chr11	63829155	63829503	chr11:63829155-63829503	63829155	63829503	0	1	348	63829149
chr1	230315040	230315274	chr1:230315040-230315274	230315040	230315274	0	1	234	230315038
chr1	7085752	7085957	chr1:7085752-7085957	7085752	7085957	0	1	205	7085745
chr19	6635695	6635936	chr19:6635695-6635936	6635695	6635936	0	1	241	6635689
chr16	57058861	57059321	chr16:57058861-57059321	57058861	57059321	0	1	460	57058856
chr19	3232844	3233172	chr19:3232844-3233172	3232844	3233172	0	1	328	3232841
chr4	6072832	6073069	chr4:6072832-6073069	6072832	6073069	0	1	237	6072826
chr9	136324940	136325143	chr9:136324940-136325143	136324940	136325143	0	1	203	136324939
chr15	70634313	70634642	chr15:70634313-70634642	70634313	70634642	0	1	329	70634306
chr8	95269396	95269875	chr8:95269396-95269875	95269396	95269875	0	1	479	95269387
chr19	15459881	15460190	chr19:15459881-15460190	15459881	15460190	0	1	309	15459880
chr7	101061851	101062313	chr7:101061851-101062313	101061851	101062313	0	1	462	101061850
chr12	64943982	64944229	chr12:64943982-64944229	64943982	64944229	0	1	247	64943976
chr5	176389071	176389342	chr5:176389071-176389342	176389071	176389342	0	1	271	176389070
chr6	108560562	108560983	chr6:108560562-108560983	108560562	108560983	0	1	421	108560561
chr2	23215082	23215305	chr2:23215082-23215305	23215082	23215305	0	1	223	23215080
chr1	30665393	30665592	chr1:30665393-30665592	30665393	30665592	0	1	199	30665390
chr5	181154956	181155212	chr5:181154956-181155212	181154956	181155212	0	1	256	181154955
chr14	20633087	20633390	chr14:20633087-20633390	20633087	20633390	0	1	303	20633085
chr2	236051638	236052044	chr2:236051638-236052044	236051638	236052044	0	1	406	236051636
chr1	173862272	173862684	chr1:173862272-173862684	173862272	173862684	0	1	412	173862271
chr1	24493705	24493908	chr1:24493705-24493908	24493705	24493908	0	1	203	24493703
chr4	139511793	139512002	chr4:139511793-139512002	139511793	139512002	0	1	209	139511792
chr11	121145756	121145953	chr11:121145756-121145953	121145756	121145953	0	1	197	121145755
chr3	43906414	43906628	chr3:43906414-43906628	43906414	43906628	0	1	214	43906410
chr10	114334513	114334731	chr10:114334513-114334731	114334513	114334731	0	1	218	114334512
chr20	3305720	3305935	chr20:3305720-3305935	3305720	3305935	0	1	215	3305717
chr6	27672152	27672544	chr6:27672152-27672544	27672152	27672544	0	1	392	27672150
chr8	41099222	41099484	chr8:41099222-41099484	41099222	41099484	0	1	262	41099218
chr1	161399485	161399899	chr1:161399485-161399899	161399485	161399899	0	1	414	161399484
chr6	169638891	169639112	chr6:169638891-169639112	169638891	169639112	0	1	221	169638890
chr21	10331325	10331574	chr21:10331325-10331574	10331325	10331574	0	1	249	10331324
chr1	48654805	48655152	chr1:48654805-48655152	48654805	48655152	0	1	347	48654801
chr4	182880907	182881117	chr4:182880907-182881117	182880907	182881117	0	1	210	182880906
chr9	90851294	90851705	chr9:90851294-90851705	90851294	90851705	0	1	411	90851285
chr2	43221052	43221491	chr2:43221052-43221491	43221052	43221491	0	1	439	43221048
chr17	19502572	19502825	chr17:19502572-19502825	19502572	19502825	0	1	253	19502571
chrX	128780667	128780927	chrX:128780667-128780927	128780667	128780927	0	1	260	128780666
chr1	179837822	179838024	chr1:179837822-179838024	179837822	179838024	0	1	202	179837821
chr6	158095734	158096167	chr6:158095734-158096167	158095734	158096167	0	1	433	158095733
chr2	29755064	29755320	chr2:29755064-29755320	29755064	29755320	0	1	256	29755062
chr12	132448285	132448488	chr12:132448285-132448488	132448285	132448488	0	1	203	132448284
chr15	80199573	80199856	chr15:80199573-80199856	80199573	80199856	0	1	283	80199565
chr12	120238980	120239259	chr12:120238980-120239259	120238980	120239259	0	1	279	120238979
chr7	2997298	2997678	chr7:2997298-2997678	2997298	2997678	0	1	380	2997296
chr1	223293616	223293904	chr1:223293616-223293904	223293616	223293904	0	1	288	223293614
chr22	33869143	33869525	chr22:33869143-33869525	33869143	33869525	0	1	382	33869140
chr15	65869043	65869309	chr15:65869043-65869309	65869043	65869309	0	1	266	65869037
chr16	11061789	11062144	chr16:11061789-11062144	11061789	11062144	0	1	355	11061788
chr10	73961008	73961205	chr10:73961008-73961205	73961008	73961205	0	1	197	73961001
chr3	197844510	197844898	chr3:197844510-197844898	197844510	197844898	0	1	388	197844509
chr12	124909231	124909847	chr12:124909231-124909847	124909231	124909847	0	1	616	124909230
chr2	113005621	113005919	chr2:113005621-113005919	113005621	113005919	0	1	298	113005620
chr7	155852054	155852254	chr7:155852054-155852254	155852054	155852254	0	1	200	155852053
chr13	27383385	27383653	chr13:27383385-27383653	27383385	27383653	0	1	268	27383383
chr7	50747857	50748124	chr7:50747857-50748124	50747857	50748124	0	1	267	50747852
chr17	65455882	65456098	chr17:65455882-65456098	65455882	65456098	0	1	216	65455876
chr6	144216408	144216637	chr6:144216408-144216637	144216408	144216637	0	1	229	144216407
chr15	89210580	89210993	chr15:89210580-89210993	89210580	89210993	0	1	413	89210572
chr5	6741007	6741309	chr5:6741007-6741309	6741007	6741309	0	1	302	6741001
chr17	43101377	43101634	chr17:43101377-43101634	43101377	43101634	0	1	257	43101373
chr15	71115802	71116245	chr15:71115802-71116245	71115802	71116245	0	1	443	71115795
chr21	36395075	36395279	chr21:36395075-36395279	36395075	36395279	0	1	204	36395072
chr1	22963375	22963738	chr1:22963375-22963738	22963375	22963738	0	1	363	22963373
chr5	53480610	53480945	chr5:53480610-53480945	53480610	53480945	0	1	335	53480605
chr12	96150210	96150441	chr12:96150210-96150441	96150210	96150441	0	1	231	96150201
chr11	68459979	68460299	chr11:68459979-68460299	68459979	68460299	0	1	320	68459973
chr21	36309693	36309918	chr21:36309693-36309918	36309693	36309918	0	1	225	36309690
chr20	37658380	37658696	chr20:37658380-37658696	37658380	37658696	0	1	316	37658377
chr6	25726176	25726592	chr6:25726176-25726592	25726176	25726592	0	1	416	25726174
chr21	45837274	45837726	chr21:45837274-45837726	45837274	45837726	0	1	452	45837270
chr15	40948738	40949000	chr15:40948738-40949000	40948738	40949000	0	1	262	40948734
chr15	60397503	60397709	chr15:60397503-60397709	60397503	60397709	0	1	206	60397497
chr19	28991111	28991421	chr19:28991111-28991421	28991111	28991421	0	1	310	28991109
chr9	37667221	37667445	chr9:37667221-37667445	37667221	37667445	0	1	224	37667218
chr20	52253687	52253960	chr20:52253687-52253960	52253687	52253960	0	1	273	52253682
chr17	80640508	80640727	chr17:80640508-80640727	80640508	80640727	0	1	219	80640500
chr10	70083192	70083542	chr10:70083192-70083542	70083192	70083542	0	1	350	70083185
chr19	55528627	55528834	chr19:55528627-55528834	55528627	55528834	0	1	207	55528622
chr6	151181444	151181725	chr6:151181444-151181725	151181444	151181725	0	1	281	151181443
chr16	12629776	12629994	chr16:12629776-12629994	12629776	12629994	0	1	218	12629775
chr10	91538949	91539181	chr10:91538949-91539181	91538949	91539181	0	1	232	91538940
chr5	178315189	178315392	chr5:178315189-178315392	178315189	178315392	0	1	203	178315188
chr5	181173483	181174213	chr5:181173483-181174213	181173483	181174213	0	1	730	181173482
chr13	30673845	30674122	chr13:30673845-30674122	30673845	30674122	0	1	277	30673842
chr22	38307658	38307856	chr22:38307658-38307856	38307658	38307856	0	1	198	38307655
chr15	40593783	40594048	chr15:40593783-40594048	40593783	40594048	0	1	265	40593779
chr7	140276843	140277139	chr7:140276843-140277139	140276843	140277139	0	1	296	140276842
chr20	1778511	1778733	chr20:1778511-1778733	1778511	1778733	0	1	222	1778510
chr8	52173441	52173782	chr8:52173441-52173782	52173441	52173782	0	1	341	52173436
chr10	122789962	122790241	chr10:122789962-122790241	122789962	122790241	0	1	279	122789961
chr5	140718987	140719327	chr5:140718987-140719327	140718987	140719327	0	1	340	140718986
chr14	20652973	20653585	chr14:20652973-20653585	20652973	20653585	0	1	612	20652971
chr10	34870323	34870820	chr10:34870323-34870820	34870323	34870820	0	1	497	34870320
chr15	66497779	66498044	chr15:66497779-66498044	66497779	66498044	0	1	265	66497773
chr10	70251387	70251608	chr10:70251387-70251608	70251387	70251608	0	1	221	70251380
chr1	15180483	15180725	chr1:15180483-15180725	15180483	15180725	0	1	242	15180482
chr20	1770620	1770856	chr20:1770620-1770856	1770620	1770856	0	1	236	1770619
chr12	56117990	56118300	chr12:56117990-56118300	56117990	56118300	0	1	310	56117985
chr10	77361647	77361938	chr10:77361647-77361938	77361647	77361938	0	1	291	77361640
chr12	96035917	96036156	chr12:96035917-96036156	96035917	96036156	0	1	239	96035908
chr16	85854273	85854485	chr16:85854273-85854485	85854273	85854485	0	1	212	85854265
chr1	94527099	94527556	chr1:94527099-94527556	94527099	94527556	0	1	457	94527090
chr13	110104682	110104917	chr13:110104682-110104917	110104682	110104917	0	1	235	110104681
chr2	121992049	121992276	chr2:121992049-121992276	121992049	121992276	0	1	227	121992048
chr18	12451444	12451710	chr18:12451444-12451710	12451444	12451710	0	1	266	12451443
chr5	136080501	136080744	chr5:136080501-136080744	136080501	136080744	0	1	243	136080500
chr4	184277397	184277601	chr4:184277397-184277601	184277397	184277601	0	1	204	184277396
chr13	94549234	94549499	chr13:94549234-94549499	94549234	94549499	0	1	265	94549225
chr16	23051260	23051594	chr16:23051260-23051594	23051260	23051594	0	1	334	23051258
chr11	63263407	63263622	chr11:63263407-63263622	63263407	63263622	0	1	215	63263401
chr2	230837509	230837742	chr2:230837509-230837742	230837509	230837742	0	1	233	230837507
chr4	128743956	128744188	chr4:128743956-128744188	128743956	128744188	0	1	232	128743955
chr2	26862921	26863122	chr2:26862921-26863122	26862921	26863122	0	1	201	26862919
chr1	55260918	55261127	chr1:55260918-55261127	55260918	55261127	0	1	209	55260913
chr16	23820520	23820790	chr16:23820520-23820790	23820520	23820790	0	1	270	23820518
chr21	26835107	26835379	chr21:26835107-26835379	26835107	26835379	0	1	272	26835105
chr10	1025212	1025528	chr10:1025212-1025528	1025212	1025528	0	1	316	1025211
chr7	44944727	44945034	chr7:44944727-44945034	44944727	44945034	0	1	307	44944723
chr22	19089337	19089559	chr22:19089337-19089559	19089337	19089559	0	1	222	19089336
chr7	148656765	148656967	chr7:148656765-148656967	148656765	148656967	0	1	202	148656764
chr2	127463643	127463975	chr2:127463643-127463975	127463643	127463975	0	1	332	127463642
chr2	136288044	136288323	chr2:136288044-136288323	136288044	136288323	0	1	279	136288043
chr7	72513530	72513736	chr7:72513530-72513736	72513530	72513736	0	1	206	72513523
chr1	147084297	147084948	chr1:147084297-147084948	147084297	147084948	0	1	651	147084296
chr2	215357208	215357419	chr2:215357208-215357419	215357208	215357419	0	1	211	215357206
chr1	13668360	13668678	chr1:13668360-13668678	13668360	13668678	0	1	318	13668359
chr6	27259641	27259915	chr6:27259641-27259915	27259641	27259915	0	1	274	27259639
chr11	113081326	113081567	chr11:113081326-113081567	113081326	113081567	0	1	241	113081325
chr21	8988008	8988218	chr21:8988008-8988218	8988008	8988218	0	1	210	8988000
chr2	74912220	74912417	chr2:74912220-74912417	74912220	74912417	0	1	197	74912213
chr6	5706105	5706490	chr6:5706105-5706490	5706105	5706490	0	1	385	5706100
chr3	179759008	179759309	chr3:179759008-179759309	179759008	179759309	0	1	301	179759007
chr3	45688863	45689146	chr3:45688863-45689146	45688863	45689146	0	1	283	45688859
chr19	3392365	3392562	chr19:3392365-3392562	3392365	3392562	0	1	197	3392362
chr1	36050417	36050671	chr1:36050417-36050671	36050417	36050671	0	1	254	36050414
chr19	57891910	57892120	chr19:57891910-57892120	57891910	57892120	0	1	210	57891905
chr2	64958103	64958412	chr2:64958103-64958412	64958103	64958412	0	1	309	64958097
chr6	27157977	27158345	chr6:27157977-27158345	27157977	27158345	0	1	368	27157975
chr7	47877232	47877453	chr7:47877232-47877453	47877232	47877453	0	1	221	47877228
chr19	33960269	33960596	chr19:33960269-33960596	33960269	33960596	0	1	327	33960266
chr21	17454670	17454960	chr21:17454670-17454960	17454670	17454960	0	1	290	17454669
chr10	15277755	15278038	chr10:15277755-15278038	15277755	15278038	0	1	283	15277754
chr15	33395804	33396029	chr15:33395804-33396029	33395804	33396029	0	1	225	33395801
chr10	3776188	3776385	chr10:3776188-3776385	3776188	3776385	0	1	197	3776185
chr2	88823445	88823683	chr2:88823445-88823683	88823445	88823683	0	1	238	88823437
chr12	109447559	109447791	chr12:109447559-109447791	109447559	109447791	0	1	232	109447558
chr2	69104769	69105118	chr2:69104769-69105118	69104769	69105118	0	1	349	69104763
chr1	64645521	64645753	chr1:64645521-64645753	64645521	64645753	0	1	232	64645515
chr2	105236928	105237155	chr2:105236928-105237155	105236928	105237155	0	1	227	105236927
chr6	27177146	27177536	chr6:27177146-27177536	27177146	27177536	0	1	390	27177144
chr17	11514478	11514793	chr17:11514478-11514793	11514478	11514793	0	1	315	11514477
chr10	2935691	2935946	chr10:2935691-2935946	2935691	2935946	0	1	255	2935689
chr12	51235274	51235691	chr12:51235274-51235691	51235274	51235691	0	1	417	51235269
chr7	152563582	152563823	chr7:152563582-152563823	152563582	152563823	0	1	241	152563581
chr20	49513173	49513400	chr20:49513173-49513400	49513173	49513400	0	1	227	49513169
chr4	5279685	5279939	chr4:5279685-5279939	5279685	5279939	0	1	254	5279680
chr3	11087229	11087455	chr3:11087229-11087455	11087229	11087455	0	1	226	11087228
chr6	27545564	27545853	chr6:27545564-27545853	27545564	27545853	0	1	289	27545562
chr7	155113053	155113385	chr7:155113053-155113385	155113053	155113385	0	1	332	155113052
chr11	50270433	50270689	chr11:50270433-50270689	50270433	50270689	0	1	256	50270428
chr17	44484970	44485237	chr17:44484970-44485237	44484970	44485237	0	1	267	44484966
chr18	59940500	59940815	chr18:59940500-59940815	59940500	59940815	0	1	315	59940495
chr20	42577804	42578019	chr20:42577804-42578019	42577804	42578019	0	1	215	42577800
chr14	20625245	20625510	chr14:20625245-20625510	20625245	20625510	0	1	265	20625243
chr18	2857574	2857964	chr18:2857574-2857964	2857574	2857964	0	1	390	2857572
chr15	67491683	67491895	chr15:67491683-67491895	67491683	67491895	0	1	212	67491677
chr11	130486636	130486926	chr11:130486636-130486926	130486636	130486926	0	1	290	130486635
chr15	43391426	43391623	chr15:43391426-43391623	43391426	43391623	0	1	197	43391422
chr18	11771682	11771949	chr18:11771682-11771949	11771682	11771949	0	1	267	11771681
chr1	176229878	176230111	chr1:176229878-176230111	176229878	176230111	0	1	233	176229877
chr14	61310660	61310953	chr14:61310660-61310953	61310660	61310953	0	1	293	61310654
chr18	3214522	3214723	chr18:3214522-3214723	3214522	3214723	0	1	201	3214519
chrX	51903264	51903588	chrX:51903264-51903588	51903264	51903588	0	1	324	51903259
chr14	20610041	20610318	chr14:20610041-20610318	20610041	20610318	0	1	277	20610039
chr15	26629964	26630273	chr15:26629964-26630273	26629964	26630273	0	1	309	26629962
chr6	168285500	168285721	chr6:168285500-168285721	168285500	168285721	0	1	221	168285499
chr10	33836386	33836780	chr10:33836386-33836780	33836386	33836780	0	1	394	33836383
chr15	40097707	40097982	chr15:40097707-40097982	40097707	40097982	0	1	275	40097703
chr2	42895386	42895637	chr2:42895386-42895637	42895386	42895637	0	1	251	42895382
chr12	124913931	124914171	chr12:124913931-124914171	124913931	124914171	0	1	240	124913930
chr7	6461097	6461337	chr7:6461097-6461337	6461097	6461337	0	1	240	6461091
chr7	63963197	63963555	chr7:63963197-63963555	63963197	63963555	0	1	358	63963191
chr6	146424127	146424342	chr6:146424127-146424342	146424127	146424342	0	1	215	146424126
chr2	207166781	207167166	chr2:207166781-207167166	207166781	207167166	0	1	385	207166779
chr10	24803873	24804120	chr10:24803873-24804120	24803873	24804120	0	1	247	24803871
chr17	8376593	8376843	chr17:8376593-8376843	8376593	8376843	0	1	250	8376585
chr10	126038026	126038273	chr10:126038026-126038273	126038026	126038273	0	1	247	126038025
chr3	38328819	38329108	chr3:38328819-38329108	38328819	38329108	0	1	289	38328816
chr6	27007103	27007387	chr6:27007103-27007387	27007103	27007387	0	1	284	27007101
chr18	4532922	4533130	chr18:4532922-4533130	4532922	4533130	0	1	208	4532918
chr14	103828033	103828358	chr14:103828033-103828358	103828033	103828358	0	1	325	103828032
chr15	76376142	76376340	chr15:76376142-76376340	76376142	76376340	0	1	198	76376135
chr12	80823272	80823548	chr12:80823272-80823548	80823272	80823548	0	1	276	80823264
chr6	27614302	27614517	chr6:27614302-27614517	27614302	27614517	0	1	215	27614300
chr19	32787325	32787644	chr19:32787325-32787644	32787325	32787644	0	1	319	32787322
chr2	156400661	156401233	chr2:156400661-156401233	156400661	156401233	0	1	572	156400660
chr17	29670532	29670779	chr17:29670532-29670779	29670532	29670779	0	1	247	29670530
chr20	38355513	38355746	chr20:38355513-38355746	38355513	38355746	0	1	233	38355510
chr1	116247642	116247925	chr1:116247642-116247925	116247642	116247925	0	1	283	116247641
chr14	98851648	98851977	chr14:98851648-98851977	98851648	98851977	0	1	329	98851639
chr16	48056475	48056680	chr16:48056475-48056680	48056475	48056680	0	1	205	48056471
chr19	33122251	33122459	chr19:33122251-33122459	33122251	33122459	0	1	208	33122248
chr6	165307811	165308210	chr6:165307811-165308210	165307811	165308210	0	1	399	165307810
chr2	99011037	99011380	chr2:99011037-99011380	99011037	99011380	0	1	343	99011028
chr18	69469669	69469947	chr18:69469669-69469947	69469669	69469947	0	1	278	69469663
chr7	116525872	116526436	chr7:116525872-116526436	116525872	116526436	0	1	564	116525871
chr1	148334588	148334810	chr1:148334588-148334810	148334588	148334810	0	1	222	148334587
chr2	152101400	152101611	chr2:152101400-152101611	152101400	152101611	0	1	211	152101399
chr1	171454552	171454771	chr1:171454552-171454771	171454552	171454771	0	1	219	171454551
chr12	103907885	103908177	chr12:103907885-103908177	103907885	103908177	0	1	292	103907884
chr7	116499850	116500115	chr7:116499850-116500115	116499850	116500115	0	1	265	116499849
chr5	137709317	137709616	chr5:137709317-137709616	137709317	137709616	0	1	299	137709316
chr4	168046619	168046823	chr4:168046619-168046823	168046619	168046823	0	1	204	168046618
chr6	134167593	134168060	chr6:134167593-134168060	134167593	134168060	0	1	467	134167592
chr9	87709874	87710091	chr9:87709874-87710091	87709874	87710091	0	1	217	87709866
chr10	92634322	92634529	chr10:92634322-92634529	92634322	92634529	0	1	207	92634313
chr17	78027980	78028280	chr17:78027980-78028280	78027980	78028280	0	1	300	78027973
chr8	100631104	100631324	chr8:100631104-100631324	100631104	100631324	0	1	220	100631103
chr1	180537015	180537236	chr1:180537015-180537236	180537015	180537236	0	1	221	180537014
chr12	31617381	31617960	chr12:31617381-31617960	31617381	31617960	0	1	579	31617378
chr20	21462605	21462818	chr20:21462605-21462818	21462605	21462818	0	1	213	21462603
chr8	118472300	118472656	chr8:118472300-118472656	118472300	118472656	0	1	356	118472299
chr7	48460172	48460408	chr7:48460172-48460408	48460172	48460408	0	1	236	48460168
chr2	2324286	2324499	chr2:2324286-2324499	2324286	2324499	0	1	213	2324284
chr12	94322705	94322940	chr12:94322705-94322940	94322705	94322940	0	1	235	94322696
chr3	120095357	120095824	chr3:120095357-120095824	120095357	120095824	0	1	467	120095356
chr8	17311563	17311936	chr8:17311563-17311936	17311563	17311936	0	1	373	17311562
chr7	149414807	149415308	chr7:149414807-149415308	149414807	149415308	0	1	501	149414806
chr19	28312411	28312634	chr19:28312411-28312634	28312411	28312634	0	1	223	28312409
chrX	21778616	21778902	chrX:21778616-21778902	21778616	21778902	0	1	286	21778614
chr5	108086747	108087023	chr5:108086747-108087023	108086747	108087023	0	1	276	108086746
chr8	133869888	133870139	chr8:133869888-133870139	133869888	133870139	0	1	251	133869887
chr1	247141415	247141662	chr1:247141415-247141662	247141415	247141662	0	1	247	247141413
chr9	1845646	1845893	chr9:1845646-1845893	1845646	1845893	0	1	247	1845645
chr3	128834981	128835181	chr3:128834981-128835181	128834981	128835181	0	1	200	128834980
chr18	63392543	63392750	chr18:63392543-63392750	63392543	63392750	0	1	207	63392537
chr17	30197256	30197494	chr17:30197256-30197494	30197256	30197494	0	1	238	30197253
chr14	70540855	70541070	chr14:70540855-70541070	70540855	70541070	0	1	215	70540848
chr6	11990021	11990264	chr6:11990021-11990264	11990021	11990264	0	1	243	11990020
chr7	111754637	111754886	chr7:111754637-111754886	111754637	111754886	0	1	249	111754636
chr22	31730328	31730556	chr22:31730328-31730556	31730328	31730556	0	1	228	31730325
chr21	40921260	40921473	chr21:40921260-40921473	40921260	40921473	0	1	213	40921256
chrX	87350369	87350651	chrX:87350369-87350651	87350369	87350651	0	1	282	87350361
chr6	144048229	144048460	chr6:144048229-144048460	144048229	144048460	0	1	231	144048228
chr14	20613347	20613879	chr14:20613347-20613879	20613347	20613879	0	1	532	20613345
chr19	57938396	57938662	chr19:57938396-57938662	57938396	57938662	0	1	266	57938391
chr12	12595251	12595484	chr12:12595251-12595484	12595251	12595484	0	1	233	12595250
chr4	173070884	173071137	chr4:173070884-173071137	173070884	173071137	0	1	253	173070883
chr18	75881843	75882042	chr18:75881843-75882042	75881843	75882042	0	1	199	75881836
chr6	27791300	27791567	chr6:27791300-27791567	27791300	27791567	0	1	267	27791298
chr11	2285425	2285624	chr11:2285425-2285624	2285425	2285624	0	1	199	2285423
chr4	153943200	153943398	chr4:153943200-153943398	153943200	153943398	0	1	198	153943199
chr3	32621639	32621865	chr3:32621639-32621865	32621639	32621865	0	1	226	32621636
chr3	9383599	9383801	chr3:9383599-9383801	9383599	9383801	0	1	202	9383590
chr1	168078580	168078783	chr1:168078580-168078783	168078580	168078783	0	1	203	168078579
chr2	154291607	154291819	chr2:154291607-154291819	154291607	154291819	0	1	212	154291606
chr18	45860080	45860346	chr18:45860080-45860346	45860080	45860346	0	1	266	45860076
chr11	118809235	118809672	chr11:118809235-118809672	118809235	118809672	0	1	437	118809234
chr13	42948098	42948298	chr13:42948098-42948298	42948098	42948298	0	1	200	42948094
chr6	26521058	26521279	chr6:26521058-26521279	26521058	26521279	0	1	221	26521056
chr15	51606983	51607255	chr15:51606983-51607255	51606983	51607255	0	1	272	51606978
chr4	15310770	15311039	chr4:15310770-15311039	15310770	15311039	0	1	269	15310769
chr11	4803981	4804258	chr11:4803981-4804258	4803981	4804258	0	1	277	4803977
chr13	100438207	100438431	chr13:100438207-100438431	100438207	100438431	0	1	224	100438206
chr4	168931467	168931670	chr4:168931467-168931670	168931467	168931670	0	1	203	168931466
chr11	22567719	22568008	chr11:22567719-22568008	22567719	22568008	0	1	289	22567717
chr8	80478949	80479207	chr8:80478949-80479207	80478949	80479207	0	1	258	80478941
chr15	53011112	53011540	chr15:53011112-53011540	53011112	53011540	0	1	428	53011107
chr16	71904170	71904442	chr16:71904170-71904442	71904170	71904442	0	1	272	71904163
chr8	21070763	21071016	chr8:21070763-21071016	21070763	21071016	0	1	253	21070761
chr6	11246228	11246427	chr6:11246228-11246427	11246228	11246427	0	1	199	11246227
chrX	143050492	143050761	chrX:143050492-143050761	143050492	143050761	0	1	269	143050491
chr18	78414746	78415026	chr18:78414746-78415026	78414746	78415026	0	1	280	78414739
chr5	113455085	113455300	chr5:113455085-113455300	113455085	113455300	0	1	215	113455084
chr13	57409417	57409676	chr13:57409417-57409676	57409417	57409676	0	1	259	57409412
chr8	33796890	33797112	chr8:33796890-33797112	33796890	33797112	0	1	222	33796887
chr2	29090536	29090839	chr2:29090536-29090839	29090536	29090839	0	1	303	29090534
chrX	98057647	98057880	chrX:98057647-98057880	98057647	98057880	0	1	233	98057638
chr6	14737318	14737609	chr6:14737318-14737609	14737318	14737609	0	1	291	14737317
chr11	92890032	92890401	chr11:92890032-92890401	92890032	92890401	0	1	369	92890023
chr10	75582412	75582691	chr10:75582412-75582691	75582412	75582691	0	1	279	75582405
chr14	52129383	52129610	chr14:52129383-52129610	52129383	52129610	0	1	227	52129378
chr1	113718673	113718900	chr1:113718673-113718900	113718673	113718900	0	1	227	113718672
chr1	204506320	204506603	chr1:204506320-204506603	204506320	204506603	0	1	283	204506318
chr12	56662325	56662535	chr12:56662325-56662535	56662325	56662535	0	1	210	56662320
chr3	188283975	188284189	chr3:188283975-188284189	188283975	188284189	0	1	214	188283974
chr10	22229342	22229607	chr10:22229342-22229607	22229342	22229607	0	1	265	22229340
chr4	132344006	132344326	chr4:132344006-132344326	132344006	132344326	0	1	320	132344005
chr4	136804926	136805138	chr4:136804926-136805138	136804926	136805138	0	1	212	136804925
chr8	6300779	6301206	chr8:6300779-6301206	6300779	6301206	0	1	427	6300773
chr3	69554740	69554944	chr3:69554740-69554944	69554740	69554944	0	1	204	69554734
chr8	24058060	24058328	chr8:24058060-24058328	24058060	24058328	0	1	268	24058058
chr7	118609578	118609809	chr7:118609578-118609809	118609578	118609809	0	1	231	118609577
chr6	75374375	75374591	chr6:75374375-75374591	75374375	75374591	0	1	216	75374368
chr12	100080202	100080412	chr12:100080202-100080412	100080202	100080412	0	1	210	100080201
chr13	77047557	77047806	chr13:77047557-77047806	77047557	77047806	0	1	249	77047550
chr2	203603169	203603391	chr2:203603169-203603391	203603169	203603391	0	1	222	203603167
chr3	113452731	113452929	chr3:113452731-113452929	113452731	113452929	0	1	198	113452730
chr6	161464893	161465106	chr6:161464893-161465106	161464893	161465106	0	1	213	161464892
chr4	116259149	116259393	chr4:116259149-116259393	116259149	116259393	0	1	244	116259148
chr1	150101514	150101733	chr1:150101514-150101733	150101514	150101733	0	1	219	150101513
chr5	7140762	7140988	chr5:7140762-7140988	7140762	7140988	0	1	226	7140755
chr22	28585459	28585662	chr22:28585459-28585662	28585459	28585662	0	1	203	28585457
chr4	59238001	59238284	chr4:59238001-59238284	59238001	59238284	0	1	283	59237996
chr8	97472463	97472740	chr8:97472463-97472740	97472463	97472740	0	1	277	97472454
chr12	82285290	82285600	chr12:82285290-82285600	82285290	82285600	0	1	310	82285282
chr15	92220408	92220626	chr15:92220408-92220626	92220408	92220626	0	1	218	92220399
chrX	142058531	142059001	chrX:142058531-142059001	142058531	142059001	0	1	470	142058530
chr11	92436462	92436674	chr11:92436462-92436674	92436462	92436674	0	1	212	92436453
chr5	85907946	85908174	chr5:85907946-85908174	85907946	85908174	0	1	228	85907938
chr12	30518055	30518550	chr12:30518055-30518550	30518055	30518550	0	1	495	30518052
chr6	46542062	46542260	chr6:46542062-46542260	46542062	46542260	0	1	198	46542058
chr22	11621617	11621843	chr22:11621617-11621843	11621617	11621843	0	1	226	11621616
chr10	62317181	62317407	chr10:62317181-62317407	62317181	62317407	0	1	226	62317175
chrX	25522502	25522754	chrX:25522502-25522754	25522502	25522754	0	1	252	25522500
chr21	16694715	16694948	chr21:16694715-16694948	16694715	16694948	0	1	233	16694714
chr12	16091713	16092164	chr12:16091713-16092164	16091713	16092164	0	1	451	16091712
chr21	39277712	39278020	chr21:39277712-39278020	39277712	39278020	0	1	308	39277709
chr6	131675787	131675995	chr6:131675787-131675995	131675787	131675995	0	1	208	131675786
chr2	76267551	76267755	chr2:76267551-76267755	76267551	76267755	0	1	204	76267544
chr2	176787058	176787284	chr2:176787058-176787284	176787058	176787284	0	1	226	176787057
chr8	126481355	126481564	chr8:126481355-126481564	126481355	126481564	0	1	209	126481354
chr3	82139330	82139563	chr3:82139330-82139563	82139330	82139563	0	1	233	82139322
chr10	128228901	128229354	chr10:128228901-128229354	128228901	128229354	0	1	453	128228900
chr2	196803637	196803908	chr2:196803637-196803908	196803637	196803908	0	1	271	196803636
chr7	42878415	42878619	chr7:42878415-42878619	42878415	42878619	0	1	204	42878411
chr12	19665621	19665920	chr12:19665621-19665920	19665621	19665920	0	1	299	19665620
chr9	20018022	20018251	chr9:20018022-20018251	20018022	20018251	0	1	229	20018020
chr16	17568550	17568787	chr16:17568550-17568787	17568550	17568787	0	1	237	17568549
chr12	30272558	30272894	chr12:30272558-30272894	30272558	30272894	0	1	336	30272555
chr18	1318591	1318850	chr18:1318591-1318850	1318591	1318850	0	1	259	1318590
chrX	112848165	112848370	chrX:112848165-112848370	112848165	112848370	0	1	205	112848164
chr15	73130679	73130886	chr15:73130679-73130886	73130679	73130886	0	1	207	73130672
chr6	63610539	63610748	chr6:63610539-63610748	63610539	63610748	0	1	209	63610533
chr13	25984244	25984486	chr13:25984244-25984486	25984244	25984486	0	1	242	25984242
chr13	76842957	76843215	chr13:76842957-76843215	76842957	76843215	0	1	258	76842950
chr9	13455306	13455505	chr9:13455306-13455505	13455306	13455505	0	1	199	13455305
chrX	133945106	133945342	chrX:133945106-133945342	133945106	133945342	0	1	236	133945105
chr2	221955961	221956198	chr2:221955961-221956198	221955961	221956198	0	1	237	221955959
chr3	85229245	85229512	chr3:85229245-85229512	85229245	85229512	0	1	267	85229237
chr7	121464560	121464775	chr7:121464560-121464775	121464560	121464775	0	1	215	121464559
chr5	128896206	128896439	chr5:128896206-128896439	128896206	128896439	0	1	233	128896205
chr10	85826581	85826895	chr10:85826581-85826895	85826581	85826895	0	1	314	85826573
chr10	96118839	96119129	chr10:96118839-96119129	96118839	96119129	0	1	290	96118830
chr2	106671174	106671435	chr2:106671174-106671435	106671174	106671435	0	1	261	106671173
chr4	164578100	164578381	chr4:164578100-164578381	164578100	164578381	0	1	281	164578099
chr5	57549926	57550506	chr5:57549926-57550506	57549926	57550506	0	1	580	57549921
chr10	116903328	116903638	chr10:116903328-116903638	116903328	116903638	0	1	310	116903327
chr5	105744329	105744606	chr5:105744329-105744606	105744329	105744606	0	1	277	105744328
chr8	15919510	15919862	chr8:15919510-15919862	15919510	15919862	0	1	352	15919509
chr2	162937947	162938180	chr2:162937947-162938180	162937947	162938180	0	1	233	162937946
chr18	77613247	77613488	chr18:77613247-77613488	77613247	77613488	0	1	241	77613240
chr6	36522241	36522441	chr6:36522241-36522441	36522241	36522441	0	1	200	36522238
chr5	44679127	44679409	chr5:44679127-44679409	44679127	44679409	0	1	282	44679123
chr2	59039378	59039597	chr2:59039378-59039597	59039378	59039597	0	1	219	59039373
chr13	38840170	38840408	chr13:38840170-38840408	38840170	38840408	0	1	238	38840167
chr3	89811887	89812197	chr3:89811887-89812197	89811887	89812197	0	1	310	89811879
chr4	84756237	84756456	chr4:84756237-84756456	84756237	84756456	0	1	219	84756229
chr4	11897785	11898001	chr4:11897785-11898001	11897785	11898001	0	1	216	11897784
chr4	64156773	64156979	chr4:64156773-64156979	64156773	64156979	0	1	206	64156767
chr9	5214353	5214566	chr9:5214353-5214566	5214353	5214566	0	1	213	5214348
chr13	63367191	63367443	chr13:63367191-63367443	63367191	63367443	0	1	252	63367185
chr5	92901492	92901700	chr5:92901492-92901700	92901492	92901700	0	1	208	92901483
chr4	149064642	149065050	chr4:149064642-149065050	149064642	149065050	0	1	408	149064641
chr9	21087105	21087306	chr9:21087105-21087306	21087105	21087306	0	1	201	21087103
chr10	27079652	27079913	chr10:27079652-27079913	27079652	27079913	0	1	261	27079650
chr13	47873037	47873325	chr13:47873037-47873325	47873037	47873325	0	1	288	47873033
chr8	107150730	107150929	chr8:107150730-107150929	107150730	107150929	0	1	199	107150729
chr3	86424620	86424867	chr3:86424620-86424867	86424620	86424867	0	1	247	86424612
chr13	58397996	58398253	chr13:58397996-58398253	58397996	58398253	0	1	257	58397991
chr2	79083192	79083498	chr2:79083192-79083498	79083192	79083498	0	1	306	79083185
chr2	194896885	194897088	chr2:194896885-194897088	194896885	194897088	0	1	203	194896884
chr9	74183020	74183217	chr9:74183020-74183217	74183020	74183217	0	1	197	74183013
chr15	48778565	48778830	chr15:48778565-48778830	48778565	48778830	0	1	265	48778561
chr1	85490766	85491204	chr1:85490766-85491204	85490766	85491204	0	1	438	85490758
chr3	118040565	118040890	chr3:118040565-118040890	118040565	118040890	0	1	325	118040564
chr14	67119495	67119841	chr14:67119495-67119841	67119495	67119841	0	1	346	67119489
chr9	83085573	83085829	chr9:83085573-83085829	83085573	83085829	0	1	256	83085565
chr1	158920265	158920497	chr1:158920265-158920497	158920265	158920497	0	1	232	158920264
chr1	145465446	145465741	chr1:145465446-145465741	145465446	145465741	0	1	295	145465445
chr9	117578344	117578579	chr9:117578344-117578579	117578344	117578579	0	1	235	117578343
chr11	7173719	7173942	chr11:7173719-7173942	7173719	7173942	0	1	223	7173712
chr8	83242296	83242732	chr8:83242296-83242732	83242296	83242732	0	1	436	83242288
chr10	60343832	60344060	chr10:60343832-60344060	60343832	60344060	0	1	228	60343826
chr12	74791044	74791484	chr12:74791044-74791484	74791044	74791484	0	1	440	74791037
chr7	34694829	34695039	chr7:34694829-34695039	34694829	34695039	0	1	210	34694826
chr1	216206421	216206635	chr1:216206421-216206635	216206421	216206635	0	1	214	216206419
chrX	32326647	32326879	chrX:32326647-32326879	32326647	32326879	0	1	232	32326644
chrX	87750921	87751160	chrX:87750921-87751160	87750921	87751160	0	1	239	87750913
chr11	112677180	112677412	chr11:112677180-112677412	112677180	112677412	0	1	232	112677179
chr14	75738842	75739134	chr14:75738842-75739134	75738842	75739134	0	1	292	75738835
chr14	44693580	44693817	chr14:44693580-44693817	44693580	44693817	0	1	237	44693576
chr1	26864144	26866250	chr1:26864144-26866250	26864144	26866250	0	1	2106	26864142
chr11	94237738	94238561	chr11:94237738-94238561	94237738	94238561	0	1	823	94237729
chr11	94237708	94238561	chr11:94237708-94238561	94237708	94238561	0	1	853	94237699
chr12	52519708	52520482	chr12:52519708-52520482	52519708	52520482	0	1	774	52519703
chr17	81866540	81868612	chr17:81866540-81868612	81866540	81868612	0	1	2072	81866532
chr17	59843554	59844670	chr17:59843554-59844670	59843554	59844670	0	1	1116	59843549
chr11	65422750	65424304	chr11:65422750-65424304	65422750	65424304	0	1	1554	65422744
chr17	59842473	59843280	chr17:59842473-59843280	59842473	59843280	0	1	807	59842468
chr17	43360784	43361489	chr17:43360784-43361489	43360784	43361489	0	1	705	43360780
chr16	3023439	3024489	chr16:3023439-3024489	3023439	3024489	0	1	1050	3023436
chr19	48967228	48968177	chr19:48967228-48968177	48967228	48968177	0	1	949	48967224
chr2	121074992	121075451	chr2:121074992-121075451	121074992	121075451	0	1	459	121074991
chr4	2942953	2943936	chr4:2942953-2943936	2942953	2943936	0	1	983	2942951
chr9	35657615	35658073	chr9:35657615-35658073	35657615	35658073	0	1	458	35657612
chr12	52514698	52515601	chr12:52514698-52515601	52514698	52515601	0	1	903	52514693
chr22	42615240	42615711	chr22:42615240-42615711	42615240	42615711	0	1	471	42615236
chr17	41618217	41619867	chr17:41618217-41619867	41618217	41619867	0	1	1650	41618213
chr11	65506762	65508284	chr11:65506762-65508284	65506762	65508284	0	1	1522	65506756
chr21	26844106	26845287	chr21:26844106-26845287	26844106	26845287	0	1	1181	26844104
chr11	65427029	65428454	chr11:65427029-65428454	65427029	65428454	0	1	1425	65427023
chr15	45200256	45200645	chr15:45200256-45200645	45200256	45200645	0	1	389	45200252
chr1	146037890	146038300	chr1:146037890-146038300	146037890	146038300	0	1	410	146037889
chr19	1383220	1383853	chr19:1383220-1383853	1383220	1383853	0	1	633	1383219
chr17	39154314	39154592	chr17:39154314-39154592	39154314	39154592	0	1	278	39154311
chr12	6943875	6944291	chr12:6943875-6944291	6943875	6944291	0	1	416	6943869
chr11	65890700	65891301	chr11:65890700-65891301	65890700	65891301	0	1	601	65890694
chr6	36678740	36679243	chr6:36678740-36679243	36678740	36679243	0	1	503	36678737
chr7	76304905	76305626	chr7:76304905-76305626	76304905	76305626	0	1	721	76304898
chr1	145281041	145281659	chr1:145281041-145281659	145281041	145281659	0	1	618	145281040
chr1	94540538	94541660	chr1:94540538-94541660	94540538	94541660	0	1	1122	94540529
chr6	52995481	52996140	chr6:52995481-52996140	52995481	52996140	0	1	659	52995476
chr2	27050637	27051279	chr2:27050637-27051279	27050637	27051279	0	1	642	27050635
chr5	181187520	181187940	chr5:181187520-181187940	181187520	181187940	0	1	420	181187519
chr16	3150608	3150972	chr16:3150608-3150972	3150608	3150972	0	1	364	3150605
chr2	150485123	150485707	chr2:150485123-150485707	150485123	150485707	0	1	584	150485122
chr1	28648518	28648807	chr1:28648518-28648807	28648518	28648807	0	1	289	28648516
chr1	248873617	248874430	chr1:248873617-248874430	248873617	248874430	0	1	813	248873615
chr19	33176904	33177276	chr19:33176904-33177276	33176904	33177276	0	1	372	33176901
chr16	3182430	3182868	chr16:3182430-3182868	3182430	3182868	0	1	438	3182427
chr17	31549983	31550441	chr17:31549983-31550441	31549983	31550441	0	1	458	31549980
chr12	76030803	76031720	chr12:76030803-76031720	76030803	76031720	0	1	917	76030796
chr10	14185549	14185981	chr10:14185549-14185981	14185549	14185981	0	1	432	14185548
chr15	63048092	63049153	chr15:63048092-63049153	63048092	63049153	0	1	1061	63048086
chr6	73513888	73514608	chr6:73513888-73514608	73513888	73514608	0	1	720	73513881
chr1	148263383	148263968	chr1:148263383-148263968	148263383	148263968	0	1	585	148263382
chr1	67686328	67686751	chr1:67686328-67686751	67686328	67686751	0	1	423	67686322
chr8	33513608	33513953	chr8:33513608-33513953	33513608	33513953	0	1	345	33513605
chr21	34889163	34889906	chr21:34889163-34889906	34889163	34889906	0	1	743	34889160
chr21	34889247	34890427	chr21:34889247-34890427	34889247	34890427	0	1	1180	34889244
chr1	67685251	67685795	chr1:67685251-67685795	67685251	67685795	0	1	544	67685245
chr14	49586364	49586926	chr14:49586364-49586926	49586364	49586926	0	1	562	49586360
chr13	44917760	44918167	chr13:44917760-44918167	44917760	44918167	0	1	407	44917756
chr6	26537377	26537776	chr6:26537377-26537776	26537377	26537776	0	1	399	26537375
chr1	85580722	85581561	chr1:85580722-85581561	85580722	85581561	0	1	839	85580714
chr2	215435407	215436035	chr2:215435407-215436035	215435407	215436035	0	1	628	215435405
chr6	27687820	27688507	chr6:27687820-27688507	27687820	27688507	0	1	687	27687818
chr14	102316955	102317228	chr14:102316955-102317228	102316955	102317228	0	1	273	102316954
chr1	144412532	144412906	chr1:144412532-144412906	144412532	144412906	0	1	374	144412531
chr5	140726061	140726339	chr5:140726061-140726339	140726061	140726339	0	1	278	140726060
chr10	67764314	67764652	chr10:67764314-67764652	67764314	67764652	0	1	338	67764308
chr14	49862536	49862990	chr14:49862536-49862990	49862536	49862990	0	1	454	49862532
chr5	140711063	140711502	chr5:140711063-140711502	140711063	140711502	0	1	439	140711062
chr1	120850517	120851028	chr1:120850517-120851028	120850517	120851028	0	1	511	120850516
chr4	74445065	74445504	chr4:74445065-74445504	74445065	74445504	0	1	439	74445058
chr1	148522562	148523084	chr1:148522562-148523084	148522562	148523084	0	1	522	148522561
chr14	20342952	20343421	chr14:20342952-20343421	20342952	20343421	0	1	469	20342950
chr17	19063574	19064024	chr17:19063574-19064024	19063574	19064024	0	1	450	19063573
chr1	148038673	148039011	chr1:148038673-148039011	148038673	148039011	0	1	338	148038672
chr21	10627493	10627830	chr21:10627493-10627830	10627493	10627830	0	1	337	10627492
chr21	8213122	8213429	chr21:8213122-8213429	8213122	8213429	0	1	307	8213114
chr5	17597908	17598935	chr5:17597908-17598935	17597908	17598935	0	1	1027	17597907

## Sheet: GO analysis
Table S5. GO analysis of the peaks-associated genes in ILF2 ChIP sequencing
Ctrl-ASO enriched peaks Enrich R analysis
Term	Overlap	P-value	Adjusted P-value	Genes
EGFR1 pathway	7	0.000445	0.164636	CDKN1A;PLAU;CAV2;CAV1;PHLDA1;ZFP36L2;ZFP36L1
Interleukin-2 signaling pathway	16	0.00398859	0.419473	DENND2D;TPI1;NOP16;DENND3;FOXO3;ACTB;ZFP36L2;DUSP7;MT2A;KLF6;PLAU;UBC;ESYT1;BRWD1;CD68;GAPDH
Regular glucocorticoid receptor pathway	4	0.00630956	0.419473	CDKN1A;KRT17;KRT14;KRT5
DNA replication pre-Initiation	4	0.00807232	0.419473	CDKN1A;UBC;MCM10;PSMB10
TSH regulation of gene expression	4	0.0112766	0.419473	BCAR3;CAV1;KRT14;KRT5
SNHG26-ASO enriched peaks Enrich R analysis
Term	Overlap	P-value	Adjusted P-value	Genes
MAPK6/MAPK4 Signaling R-HSA-5687128	4	0.000445	0.0606469	JUN;AGO1;MAPK4;TNRC6B
Estrogen-dependent Gene Expression R-HSA-9018519	4	0.00126927	0.074379	JUN;AGO1;POLR2F;TNRC6B
ESR-mediated Signaling R-HSA-8939211	4	0.00656674	0.139197	JUN;AGO1;POLR2F;TNRC6B
Signaling By Nuclear Receptors R-HSA-9006931	4	0.0196112	0.247226	JUN;AGO1;POLR2F;TNRC6B
Extracellular Matrix Organization R-HSA-1474244	4	0.0281764	0.247226	CAPN13;COL4A2;DMD;ERC2
