# Supplementary material for: The lncRNA SNHG26 drives the inflammatory-to-proliferative state transition of keratinocyte progenitor cells during wound healing
Source: Research Square preprint supplement (doi:10.21203/rs.3.rs-3810067/v1), 2024-03-04
Supplement: Supplementary file 2 [file 652160b8ed4abfbfa4bbb813.xlsx]

## Sheet: Sheet1
Table S1. Patient information
Donor	Gender	Age	Ethnicity	Wound location	Experiment
1	F	66	Caucasian	Lower leg	RNA-seq
2	M	69	Caucasian	Lower leg	RNA-seq
3	F	67	Caucasian	Lower leg	RNA-seq
4	M	69	Caucasian	Lower leg	RNA-seq
5	F	64	Caucasian	Lower leg	RNA-seq
6	F	66	Caucasian	Lower leg	qPCR
7	F	64	Caucasian	Lower leg	qPCR
8	F	77	Caucasian	Lower leg	qPCR
9	F	64	Caucasian	Lower leg	qPCR
10	M	73	Caucasian	Lower leg	qPCR
11	M	62	Caucasian	Lower leg	qPCR
12	F	86	Caucasian	Lower leg	qPCR
13	F	40	Caucasian	Abdomen	qPCR
14	F	55	Caucasian	Abdomen	qPCR
15	M	35	Caucasian	Abdomen	qPCR
16	F	48	Caucasian	Abdomen	qPCR
17	M	30	Caucasian	Abdomen	qPCR
18	M	33	Caucasian	Abdomen	qPCR
19	F	22	Caucasian	Back	Spatial transcriptomic
20	M	58	Caucasian	Back	RNAscope
21	F	58	Caucasian	Back	RNAscope
22	F	38	Caucasian	Abdomen	ex vivo
23	F	42	Caucasian	Abdomen	ex vivo
24	F	48	Caucasian	Back	MACS Cell Separation
25	M	27	Caucasian	Back	MACS Cell Separation
26	F	24	Caucasian	Back	MACS Cell Separation
27	M	24	Caucasian	Back	MACS Cell Separation
28	F	46	Caucasian	Back	MACS Cell Separation
