# Supplementary material for: The lncRNA SNHG26 drives the inflammatory-to-proliferative state transition of keratinocyte progenitor cells during wound healing
Source: Research Square preprint supplement (doi:10.21203/rs.3.rs-3810067/v1), 2024-03-04
Supplement: Supplementary file 3 [file 8025cf770a81c047b86d9225.xlsx]

## Sheet: Sheet2
Antibodies
Mouse monoclonal anti human ILF2	Santa Cruz	sc-365283
Rat monoclonal anti mouse CD68 (FA-11)	Bio-Rad Laboratories	MCA1957
Donkey anti-Rat IgG (H+L) Highly Cross-Adsorbed Secondary Antibody, Alexa Fluor™ 488	Thermo Fisher	A-21208
Biological samples
Human wound samples	Karolinska Institutet Biobank	N/A
Human plastic surgery samples	Karolinska Institutet Biobank	N/A
Chemicals, peptides, and recombinant proteins
Dynabeads™ MyOne™ Streptavidin C1	Thermo Fisher	65001
Pierce™ Protein A/G Magnetic Beads	Thermo Fisher	88802
Pierce™ 16% Formaldehyde (w/v), Methanol-free	Thermo Fisher	28906
Glycine	Sigma-Aldrich	50046
ProLong™ Diamond Antifade Mountant with DAPI	Thermo Fisher	P36966
TRIzol™ Reagent	Thermo Fisher	15596018
Red Blood Cell Lysis Solution	Miltenyi Biotec	130-094-183
EpiLife™ Medium, with 60 µM calcium	Thermo Fisher	MEPI500CA
Human Keratinocyte Growth Supplement (HKGS)	Thermo Fisher	S0015
DMEM, high glucose	Thermo Fisher	11965092
TritonX100
Dispase II, powder	Thermo Fisher	17105041
Recombinant Human TNF-alpha Protein	R&D Systems	210-TA-020
BSA
Pierce™ IP Lysis Buffer	Thermo Fisher	87787
Recombinant Proteinase K Solution (20 mg/mL)	Thermo Fisher	AM2546
2x Laemmli Sample Buffer	Bio-Rad Laboratories	1610737EDU
ILF2	MyBioSource	MBS717138
Critical commercial assays
miRNeasy Mini Kit	Qiagen	217004
Whole Skin Dissociation Kit, human	Miltenyi Biotec	130-101-540
Dead Cell Removal Kit	Miltenyi Biotec	130-090-101
MAGnify™ Chromatin Immunoprecipitation System	Thermo Fisher	492024
MEGAscript™ T7 Transcription Kit	Thermo Fisher	AM1334
MEGAclear™ Transcription Clean-Up Kit	Thermo Fisher	AM1908
Pierce™ RNA 3' End Desthiobiotinylation Kit	Thermo Fisher	20163
Chromium Next GEM Single Cell 3ʹ Reagent Kits v3.1, 16 rxns	10X Genomics	PN-1000268
Chromium Next GEM Chip G Single Cell Kit, 48 rxns	10X Genomics	PN-1000120
Dual Index Kit TT Set A	10X Genomics	PN-1000215
Nuclear Extract Kit	Active Motif	40010
RNAscope® Multiplex Fluorescent Reagent Kit v2	Advanced Cell Diagnostics, Inc	323100
RNA-Protein Co-detection Ancillary Kit	Advanced Cell Diagnostics, Inc	323180
Visium Spatial Gene Expression Slide & Reagents Kit	10X Genomics	1000187
Visium Spatial Gene Expression Starter Kit	10X Genomics	1000200
Visium Spatial Tissue Optimization Slide & Reagents Kit	10X Genomics	1000193
RevertAid First Strand cDNA Synthesis Kit	Thermo Fisher	K1622
Power SYBR™ Green PCR Master Mix	Thermo Fisher	4368708
TaqMan™ Universal PCR Master Mix	Thermo Fisher	4304437
CD45 MicroBeads, human	Miltenyi Biotec	130-045-801
CD90 MicroBeads, human	Miltenyi Biotec	130-096-253
CD3 MicroBeads, human	Miltenyi Biotec	130-097-043
CD14 MicroBeads, human	Miltenyi Biotec	130-050-201
Deposited data
The human wound bulk RNA sequencing data	This paper	GSE174661
Microarray data of epidermis from WT and Snhg26 KO mice	This paper	GSE216822
Microarray data of human keratinocytes transfected with SNHG26-ASO	This paper	GSE216823
Single-cell RNA sequencing data of WT and Snhg26 KO mice wound	This paper	GSE218430
ILF2 ChIP-sequencing data	This paper	GSE218430
SNHG26 ChIRP sequencing data	This paper	GSE218430
Experimental models: Organisms/strains
C57BL/6J Mice	Charles River Laboratories	Strain code: 632
DB/DB mice	Janvier Labs	BKS(D)-Leprdb/JOrlR
Snhg26 KO mice	Cyagen	N/A
Experimental models: cell line
Human Epidermal Keratinocytes, adult (HEKa)	Thermo Fisher	C0055C
Normal Human Primary Epidermal Keratinocytes Adult (HEKa)	Lifeline	FC-0025
Ker-CT	ATCC	CRL-4048
Oligonucleotides
IL6 qPCR primer	Integrated DNA Technologies	Hs.PT.58.40226675
LAMB3 qPCR primer	Integrated DNA Technologies	Hs.PT.58.38560584
ILF2 qPCR primer	Integrated DNA Technologies	Hs.PT.58.2029176
Krt16 qPCR primer	Integrated DNA Technologies	Mm.PT.58.42223107
Sprr1b qPCR primer	Integrated DNA Technologies	Mm.PT.58.10701413
Il6 qPCR primer	Integrated DNA Technologies	Mm.PT.58.10005566
Il1b qPCR primer	Integrated DNA Technologies	Mm.PT.58.41616450
Lamb3 qPCR primer	Integrated DNA Technologies	Mm.PT.58.43545221
SNHG26 qPCR primer:	Integrated DNA Technologies	N/A
FWD: CTCACCTCTGATGTATCCATTGT
REV: CAGGGAAGCCACAGTAGTATTC
Pro: TGTGGGCATGAGATGGCAGAAAGT
IL8 qPCR primer:	Integrated DNA Technologies	N/A
FWD: CCACACTGCGCCAACA
REV: GCATCTTCACTGATTCTTGGAT
Pro: CTGGGTGCAGAGGGTTGTGG
CCL20 qPCR primer:	Integrated DNA Technologies	N/A
FWD: CTCGCTGCTTTGATGTCAGTG
REV: GCAGTCAAAGTTGCTTGCTGC
Pro:TGCTACTCCACCTCTGCGGCGAA
HIST1H1D qPCR primer:	Integrated DNA Technologies	N/A
FWD: AGCGTCACCGTAAGGTATTG
REV: CTCCGCGAGTTTCCTCATAAA
MALAT1 qPCR primer:	Integrated DNA Technologies	N/A
FWD: GATCTAGCACAGACCCTTCAC
REV: CGACACCATCGTTACCTTGA
HPRT qPCR primer:	Integrated DNA Technologies	N/A
FWD: GCTATAAATTCTTTGCTGACCTGCTG
REV: AATTACTTTTATGTCCCCTGTTGACTGG
IL6 Chip primer	Integrated DNA Technologies	N/A
FWD: GCCTGCATTAGGAGGTCTTT
REV: CCTGACACCAGCAAAGGATAA
IL8 Chip primer	Integrated DNA Technologies	N/A
FWD: CTCAGACAATTCCACTCCTTGT
REV: AGCTAAGACTCTCCAGCATAGA
CCL20 Chip primer	Integrated DNA Technologies	N/A
FWD: CCAGGCTGCTGTCAGAATATAA
REV: AGGAGCAAACTCTTGGTACAG
Jun Chip primer	Integrated DNA Technologies	N/A
FWD: AAGCCTAAGACGCAGGAAAG
REV: TCTCTAACTGCCCAGAGCTA
LAMB3 Chip primer	Integrated DNA Technologies	N/A
FWD: CAACAGCCTCCTCACTGATATAC
REV: CCTGAGCTAAGACAGGGATAGA
Snhg26 qPCR primer	Integrated DNA Technologies	N/A
FWD: CCATAGGCCCAAAGGCTAAT
REV: CAGACTTGGTCTGGTCATCTTC"
Gapdh qPCR primer	Integrated DNA Technologies	N/A
FWD:TGTGTCCGTCATCTGA
REV: CCTGCTTCACTCTTGA
Lincode siRNA
Lincode Non-targeting Control	Horizon Discovery	D-001320-10
SNHG15 siRNA	Horizon Discovery	R-028841-00
SNHG12 siRNA	Horizon Discovery	R-027562-00
NOP14-AS1 siRNA	Horizon Discovery	R-188283-00
NEAT1 siRNA	Horizon Discovery	R-188237-00
MALAT1 siRNA	Horizon Discovery	R-187978-00
CRNDE siRNA	Horizon Discovery	R-036204-00
MIR22HG siRNA	Horizon Discovery	R-015037-00
MEG3 siRNA	Horizon Discovery	R-187952-00
GAS5 siRNA	Horizon Discovery	R-188293-00
EMX2OS siRNA	Horizon Discovery	R-187913-00
ZFAS1 siRNA	Horizon Discovery	R-034485-00
WDFY3-AS2 siRNA	Horizon Discovery	R-031854-00
SOX9-AS1 siRNA	Horizon Discovery	R-030800-00
SNHG6 siRNA	Horizon Discovery	R-187922-00
SNHG1 siRNA	Horizon Discovery	R-188051-00
PVT1 siRNA	Horizon Discovery	R-029357-00
EIF1B-AS1 siRNA	Horizon Discovery	R-033853-00
LOC101929709 siRNA	Horizon Discovery	R-192637-00
SNHG26 siRNA	Horizon Discovery	N/A
AUAGCCUAGCAAUGCAUU, UACUACUGUGGCUUCCUU
RMRP siRNA	Horizon Discovery	N/A
CUCCAAAGUCCGCCAAGAAUU, AGAGAGUGCCACGUGCAUAUU
ILF2 siRNA	Horizon Discovery	N/A
CUG GAU CCU UGA CCU ACU ATT
LAMB3 siRNA	Horizon Discovery	N/A
GUC ACC GAG UAG AGA AUG UTT
gRNA for SNHG26 knockout
gRNA 1: CAGGGGAGTCTTTGCTCGGCTGG	Sangon	N/A
gRNA2: CCACCCTAAGGCCTTGTAGCTGG	Sangon	N/A
ASOs
SNHG26 ASO	Qiagen	N/A
TGCATTGCTAGGCTAT
Snhg26 ASO	Qiagen	N/A
CATCTTCACCGCTAAA
Probes for ChIRP
SNHG26_1 CACCAACCAAAAAGTTGCCG	Eurofins Scientific	N/A
SNHG26_2 ATCTTGAAACTCCACCAAGC	Eurofins Scientific	N/A
SNHG26_3 TGTCCCAAGAGTGATTTTGA	Eurofins Scientific	N/A
SNHG26_4 AATGCTGCTGTGGATACAGC	Eurofins Scientific	N/A
SNHG26_5 ACATCCTAAGCTTTCCTGAA	Eurofins Scientific	N/A
SNHG26_6 GTTTCAACCCAAGACCAATT	Eurofins Scientific	N/A
SNHG26_7 ATGACTCACAACCCATACTT	Eurofins Scientific	N/A
SNHG26_8 GAAAATGCTCTTGGTCACCA	Eurofins Scientific	N/A
SNHG26_9 ACCTAGAATCCTAAGGGACA	Eurofins Scientific	N/A
SNHG26_10 ATTGGACAACTCTGCATTGC	Eurofins Scientific	N/A
SNHG26_11 AGTTTAACAGTCCATTCCTG	Eurofins Scientific	N/A
SNHG26_12 GGAAGCCCTCTTTGAAAACT	Eurofins Scientific	N/A
SNHG26_13 CTGGGTCTTATTTACGTCAC	Eurofins Scientific	N/A
SNHG26_14 GGCTACTTTTAGGAAACAGA	Eurofins Scientific	N/A
SNHG26_15 TGTAAGGCTTAAGGACCTTC	Eurofins Scientific	N/A
SNHG26_16 TCCAGAAAGGTAGGAACTGT	Eurofins Scientific	N/A
SNHG26_17 AGTCAACCAGAGAACATTCT	Eurofins Scientific	N/A
SNHG26_18 TGGAGCCTACAGCATGAGAT	Eurofins Scientific	N/A
SNHG26_19 AAGAAAGCTTACTCCTCGGC	Eurofins Scientific	N/A
SNHG26_20 GAAAATCAGCTGAGTAGGCC	Eurofins Scientific	N/A
SNHG26_21 TCTCTGGCTGTTCACAGAAT	Eurofins Scientific	N/A
SNHG26_22 CCAGTTTATGAATACGAGGT	Eurofins Scientific	N/A
SNHG26_23 TAGTCATGGTGGCATAATCC	Eurofins Scientific	N/A
SNHG26_24 CCTGGAGATGGAGATGTCAA	Eurofins Scientific	N/A
SNHG26_25 GCTCTATTCCCAGAAACATA	Eurofins Scientific	N/A
SNHG26_26 AGTAACATGGCAGGGCACTT	Eurofins Scientific	N/A
SNHG26_27 CCACATATTTCTCACTGTGA	Eurofins Scientific	N/A
SNHG26_28 GTACTCAATAGCACATGTGA	Eurofins Scientific	N/A
LacZ_1 CCAGTGAATCCGTAATCATG	Eurofins Scientific	N/A
LacZ_2 TCACGACGTTGTAAAACGAC	Eurofins Scientific	N/A
LacZ_3 ATTAAGTTGGGTAACGCCAG	Eurofins Scientific	N/A
LacZ_4 AGGTTACGTTGGTGTAGATG	Eurofins Scientific	N/A
LacZ_5 AATGTGAGCGAGTAACAACC	Eurofins Scientific	N/A
LacZ_6 GTAGCCAGCTTTCATCAACA	Eurofins Scientific	N/A
LacZ_7 AATAATTCGCGTCTGGCCTT	Eurofins Scientific	N/A
LacZ_8 AGATGAAACGCCGAGTTAAC	Eurofins Scientific	N/A
LacZ_9 AATTCAGACGGCAAACGACT	Eurofins Scientific	N/A
LacZ_10 TTTCTCCGGCGCGTAAAAAT	Eurofins Scientific	N/A
LacZ_11 ATCTTCCAGATAACTGCCGT	Eurofins Scientific	N/A
LacZ_12 AACGAGACGTCACGGAAAAT	Eurofins Scientific	N/A
LacZ_13 GCTGATTTGTGTAGTCGGTT	Eurofins Scientific	N/A
LacZ_14 TTAAAGCGAGTGGCAACATG	Eurofins Scientific	N/A
LacZ_15 AACTGTTACCCGTAGGTAGT	Eurofins Scientific	N/A
LacZ_16 ATAATTTCACCGCCGAAAGG	Eurofins Scientific	N/A
LacZ_17 TTTCGACGTTCAGACGTAGT	Eurofins Scientific	N/A
LacZ_18 ATAGAGATTCGGGATTTCGG	Eurofins Scientific	N/A
LacZ_19 ACCATTTTCAATCCGCACCT	Eurofins Scientific	N/A
LacZ_20 TTAACGCCTCGAATCAGCAA	Eurofins Scientific	N/A
LacZ_21 TTCATCAGCAGGATATCCTG	Eurofins Scientific	N/A
LacZ_22 CACGGCGTTAAAGTTGTTCT	Eurofins Scientific	N/A
LacZ_23 TGGTTCGGATAATGCGAACA	Eurofins Scientific	N/A
LacZ_24 TTGGCTTCATCCACCACATA	Eurofins Scientific	N/A
LacZ_25 AGACGATTCATTGGCACCAT	Eurofins Scientific	N/A
LacZ_26 TGATCACACTCGGGTGATTA	Eurofins Scientific	N/A
LacZ_27 ATTTGATCCAGCGATACAGC	Eurofins Scientific	N/A
LacZ_28 AAATAATATCGGTGGCCGTG	Eurofins Scientific	N/A
Software and algorithms
Image J	National Institutes of Health	N/A
GraphPad Prism 8	GraphPad Software	N/A
ENRICH R	Ma'ayan Lab	N/A
GSEA	Broad Institute	N/A
Rstudio	Rstudio	https://www.rstudio.com/; RRID:SCR_000432
Cell Ranger (v5.0.1); Space Ranger (v1.2)	10X Genomics	https://www.10xgenomics.com/; RRID:SCR_017344
Seurat (v4.1.0)	Hao et al., 2021 (PMID: 34062119)	https://github.com/satijalab/seurat/; RRID:SCR_016341
CellChat (v1.4.0)	Jin et al., 2021 (PMID: 33597522)	https://github.com/sqjin/CellChat
MACS (v2.2.6)	Zhang et al., 2008 (PMID: 18798982)	https://github.com/macs3-project/MACS; RRID:SCR_013291
IGV	Robinson et al., 2011 (PMID: 21221095)	http://www.broadinstitute.org/igv/; RRID:SCR_011793
