# Supplementary material for: The lncRNA SNHG26 drives the inflammatory-to-proliferative state transition of keratinocyte progenitor cells during wound healing
Source: Research Square preprint supplement (doi:10.21203/rs.3.rs-3810067/v1), 2024-03-04
Supplement: Supplementary file 4 [file ba264a5534b3d47debac1926.xlsx]

## Sheet: C2_Basal2
Table S3 Marker genes of basal keratinocyte clusters (C2_Basal2)
Ensembl ID	Log2FC	P-value	Gene Name
H2ac24	4.514	0	H2ac24
H1f5	4.461	0	H1f5
H2ac8	3.912	0	H2ac8
H1f4	3.355	0	H1f4
ENSMUSG00000020914	3.261	0	Top2a
ENSMUSG00000068855	3.05	0	H2ac20
ENSMUSG00000031004	3.017	0	Mki67
ENSMUSG00000040204	2.977	0	Pclaf
H4c4	2.977	0	H4c4
H3c3	2.83	0	H3c3
ENSMUSG00000038943	2.826	0	Prc1
ENSMUSG00000054717	2.82	0	Hmgb2
ENSMUSG00000027306	2.805	0	Nusap1
ENSMUSG00000028312	2.757	0	Smc2
ENSMUSG00000001403	2.751	5.61e-304	Ube2c
ENSMUSG00000022034	2.713	0	Esco2
ENSMUSG00000019942	2.647	0	Cdk1
ENSMUSG00000049932	2.638	0	H2ax
ENSMUSG00000028832	2.637	6.8e-322	Stmn1
H2ac4	2.589	0	H2ac4
ENSMUSG00000017716	2.588	0	Birc5
ENSMUSG00000026605	2.587	1.73e-271	Cenpf
Smc4	2.576	1.96e-321	Smc4
ENSMUSG00000061527	2.524	2.3e-287	Krt5
ENSMUSG00000028873	2.476	1.487e-321	Cdca8
ENSMUSG00000036777	2.45	0	Anln
ENSMUSG00000024660	2.446	0	Incenp
ENSMUSG00000062248	2.38	0	Cks2
ENSMUSG00000030978	2.366	0	Rrm1
H1f1	2.343	0	H1f1
ENSMUSG00000012443	2.339	0	Kif11
ENSMUSG00000042489	2.337	0	Clspn
ENSMUSG00000001525	2.335	0	Tubb5
ENSMUSG00000020897	2.313	0	Aurkb
ENSMUSG00000022033	2.303	0	Pbk
ENSMUSG00000027326	2.294	7.62e-307	Knl1
ENSMUSG00000023505	2.292	3.91e-289	Cdca3
ENSMUSG00000021377	2.265	0	Dek
H1f3	2.258	2.37118e-312	H1f3
ENSMUSG00000025747	2.257	0	Tyms
ENSMUSG00000074476	2.256	2.1e-322	Spc24
ENSMUSG00000096472	2.224	3.35e-276	Cdkn2d
ENSMUSG00000025574	2.205	0	Tk1
ENSMUSG00000005233	2.195	0	Spc25
ENSMUSG00000020649	2.19	1.16e-285	Rrm2
ENSMUSG00000037894	2.187	1.08e-300	H2az1
ENSMUSG00000045328	2.187	3.72e-266	Cenpe
ENSMUSG00000041126	2.186	9.09e-274	H2az2
ENSMUSG00000019773	2.159	0	Fbxo5
ENSMUSG00000027469	2.151	3.12e-307	Tpx2
ENSMUSG00000020330	2.149	2.93e-275	Hmmr
ENSMUSG00000036752	2.141	1.62e-246	Tubb4b
ENSMUSG00000045545	2.14	2.76e-261	Krt14
ENSMUSG00000048327	2.123	2.73e-307	Ckap2l
ENSMUSG00000027203	2.114	0	Dut
ENSMUSG00000056394	2.09	2.6e-281	Lig1
H2bc11	2.084	1.86e-298	H2bc11
ENSMUSG00000023015	2.084	1.37e-292	Racgap1
ENSMUSG00000027715	2.08	6.09e-308	Ccna2
ENSMUSG00000023004	2.067	5.98e-294	Tuba1b
ENSMUSG00000028044	2.06	1.27e-291	Cks1b
ENSMUSG00000006715	2.056	1.02e-305	Gmnn
ENSMUSG00000022360	2.047	9.24e-264	Atad2
ENSMUSG00000024795	2.043	1.87e-287	Kif20b
ENSMUSG00000021792	2.031	1.16e-230	Prxl2a
ENSMUSG00000030654	2.031	1.48e-204	Arl6ip1
ENSMUSG00000041431	2.03	1.27e-282	Ccnb1
ENSMUSG00000036768	2.019	1.0599e-317	Kif15
ENSMUSG00000066979	2.014	1.82e-288	Bub3
ENSMUSG00000027160	2.001	8.21e-283	Ccdc34
ENSMUSG00000032254	1.95	8.94e-265	Kif23
ENSMUSG00000019961	1.948	8.09e-279	Tmpo
ENSMUSG00000025064	1.943	9.78e-242	Col17a1
ENSMUSG00000047730	1.942	1.13e-151	Fcgbp
H3c6	1.935	5.1e-287	H3c6
ENSMUSG00000006398	1.916	1.2e-269	Cdc20
ENSMUSG00000029177	1.912	6.88e-213	Cenpa
ENSMUSG00000027342	1.903	1.6e-252	Pcna
ENSMUSG00000096210	1.901	3.14e-177	H1f0
ENSMUSG00000042029	1.875	3.77e-281	Ncapg2
ENSMUSG00000024056	1.873	3.66e-308	Ndc80
ENSMUSG00000066551	1.872	2.32e-270	Hmgb1
Cbx5	1.865	2.65e-274	Cbx5
ENSMUSG00000029687	1.864	1.51e-266	Ezh2
ENSMUSG00000043091	1.859	2.7e-217	Tuba1c
ENSMUSG00000026238	1.851	8.92e-274	Ptma
ENSMUSG00000020608	1.85	2.75e-272	Smc6
ENSMUSG00000030867	1.849	5.28e-267	Plk1
ENSMUSG00000015880	1.838	2.23e-291	Ncapg
ENSMUSG00000003038	1.837	2.59e-245	Hmgn2
ENSMUSG00000054905	1.835	5.01e-179	Stfa3
ENSMUSG00000047534	1.83	7.44e-271	Mis18bp1
ENSMUSG00000027330	1.828	5.41e-262	Cdc25b
Cenpm	1.807	6.46e-308	Cenpm
ENSMUSG00000028333	1.802	9.63e-242	Anp32b
ENSMUSG00000022021	1.793	3.09e-270	Diaph3
ENSMUSG00000035585	1.788	1.06e-255	Tsen34
ENSMUSG00000005732	1.787	1.02e-262	Ranbp1
ENSMUSG00000032218	1.785	1.29e-223	Ccnb2
ENSMUSG00000042462	1.781	8.52e-271	Dctpp1
ENSMUSG00000074445	1.77	9.1e-50	Sprr2a3
ENSMUSG00000030677	1.766	4.09e-267	Kif22
ENSMUSG00000053398	1.763	4.76e-227	Phgdh
ENSMUSG00000021485	1.758	9.7e-284	Mxd3
ENSMUSG00000033952	1.754	2.93e-235	Aspm
ENSMUSG00000037313	1.753	5.34e-277	Tacc3
ENSMUSG00000022314	1.746	3.48e-242	Rad21
ENSMUSG00000034192	1.741	2.02e-280	Lsm3
ENSMUSG00000021811	1.736	5.7e-268	Dnajc9
ENSMUSG00000022322	1.734	1.29e-270	Shcbp1
ENSMUSG00000105827	1.733	6.04e-253	H2bc18
ENSMUSG00000026281	1.732	4.72e-247	Dtymk
ENSMUSG00000029730	1.73	6.43e-260	Mcm7
ENSMUSG00000034311	1.727	1.84e-269	Kif4
ENSMUSG00000005470	1.726	7.01e-297	Asf1b
ENSMUSG00000026434	1.725	1.23e-249	Nucks1
ENSMUSG00000035683	1.724	3.68e-278	Melk
ENSMUSG00000027496	1.722	6.04e-252	Aurka
ENSMUSG00000005410	1.721	9.61e-262	Mcm5
ENSMUSG00000002477	1.719	8.98e-276	Snrpd1
ENSMUSG00000014633	1.71	6.23e-254	Cmc2
H1f2	1.709	6.26e-218	H1f2
ENSMUSG00000026039	1.695	3.26e-267	Sgo2a
ENSMUSG00000001228	1.689	5.39e-258	Uhrf1
ENSMUSG00000004099	1.685	5.13e-231	Dnmt1
ENSMUSG00000025395	1.684	8.19e-251	Prim1
ENSMUSG00000035024	1.679	2.31e-259	Ncapd3
ENSMUSG00000020758	1.679	2.38e-226	Itgb4
ENSMUSG00000027111	1.679	1.3e-217	Itga6
ENSMUSG00000036856	1.676	2.37e-211	Wnt4
ENSMUSG00000045273	1.664	1.86e-272	Cenph
ENSMUSG00000029516	1.664	2.15e-255	Cit
ENSMUSG00000030346	1.659	1.96e-293	Rad51ap1
ENSMUSG00000023940	1.659	6.66e-262	Sgo1
ENSMUSG00000038252	1.648	2.13e-265	Ncapd2
ENSMUSG00000025651	1.648	4.32e-227	Uqcrc1
ENSMUSG00000029430	1.646	1.07e-244	Ran
ENSMUSG00000028693	1.628	6.44e-239	Nasp
ENSMUSG00000003955	1.617	3.14e-206	Fam162a
ENSMUSG00000001025	1.617	5.65e-194	S100a6
ENSMUSG00000027018	1.609	5.25e-245	Hat1
ENSMUSG00000027323	1.603	8.23e-292	Rad51
ENSMUSG00000015749	1.602	7.38e-227	Anp32e
ENSMUSG00000059005	1.601	3.28e-231	Hnrnpa3
ENSMUSG00000032397	1.597	4.51e-250	Tipin
ENSMUSG00000022391	1.596	1.46e-216	Rangap1
H4c8	1.591	2.26e-219	H4c8
ENSMUSG00000007041	1.589	2.13e-240	Clic1
ENSMUSG00000016559	1.585	8.59e-223	H3f3b
ENSMUSG00000020267	1.581	1.05e-254	Hint1
ENSMUSG00000037725	1.58	2.75e-226	Ckap2
ENSMUSG00000032231	1.578	5.38e-202	Anxa2
ENSMUSG00000004642	1.578	5.27e-180	Slbp
ENSMUSG00000023104	1.563	2.74e-233	Rfc2
ENSMUSG00000040658	1.561	1.53e-247	Dnph1
ENSMUSG00000029191	1.559	1.99e-219	Rfc1
ENSMUSG00000026167	1.555	7.69e-169	Wnt10a
ENSMUSG00000041736	1.548	6.75e-226	Tspo
ENSMUSG00000002297	1.545	1.44e-237	Dbf4
Calm2	1.543	7.97e-232	Calm2
ENSMUSG00000007050	1.539	3.63e-246	Lsm2
ENSMUSG00000020738	1.534	8.55e-256	Sumo2
ENSMUSG00000024007	1.528	4.81e-244	Ppil1
ENSMUSG00000052833	1.525	6.34e-239	Sae1
ENSMUSG00000030750	1.524	8.36e-233	Nsmce1
ENSMUSG00000071172	1.522	4.12e-241	Srsf3
ENSMUSG00000006589	1.521	3.57e-203	Aprt
ENSMUSG00000076437	1.52	2.84e-243	Selenoh
ENSMUSG00000028066	1.513	3.38e-242	Pmf1
ENSMUSG00000031353	1.513	2.91e-232	Rbbp7
ENSMUSG00000063856	1.513	4.45e-191	Gpx1
ENSMUSG00000056737	1.509	9.06e-206	Capg
ENSMUSG00000026355	1.507	4.81e-183	Mcm6
ENSMUSG00000027699	1.498	1.66e-226	Ect2
ENSMUSG00000021118	1.497	1.56e-206	Plek2
ENSMUSG00000057236	1.495	1.03e-239	Rbbp4
H4c9	1.492	6.21e-194	H4c9
ENSMUSG00000022881	1.491	2.46e-247	Rfc4
ENSMUSG00000027067	1.491	2.16e-238	Ssrp1
ENSMUSG00000040084	1.491	1.57e-219	Bub1b
ENSMUSG00000071561	1.491	1.22e-139	Cstdc5
ENSMUSG00000041859	1.49	3.13e-197	Mcm3
ENSMUSG00000057406	1.488	3.25e-205	Nsd2
ENSMUSG00000057278	1.486	8.37e-223	Snrpg
ENSMUSG00000024974	1.485	1.18e-219	Smc3
ENSMUSG00000041959	1.485	4.12e-191	S100a10
H3c7	1.482	6.84e-227	H3c7
ENSMUSG00000026779	1.477	1.11e-244	Mastl
ENSMUSG00000042606	1.476	5.39e-208	Hirip3
ENSMUSG00000075266	1.475	1.48e-236	Cenpw
ENSMUSG00000002799	1.475	2.25e-182	Jag2
ENSMUSG00000029363	1.469	7.9e-235	Rfc5
ENSMUSG00000035198	1.468	1.64e-235	Tubg1
ENSMUSG00000044783	1.468	2.61e-218	Hjurp
ENSMUSG00000041133	1.466	2.79e-209	Smc1a
ENSMUSG00000076441	1.464	3.14e-181	Ass1
ENSMUSG00000032294	1.463	4.26e-187	Pkm
ENSMUSG00000053907	1.46	1.62e-189	Mat2a
ENSMUSG00000032224	1.459	6.89e-201	Fam81a
ENSMUSG00000022177	1.458	2.7e-248	Haus4

## Sheet: C3_Basal3
Table S3 Marker genes of basal keratinocyte clusters (C3_Basal3)
Ensembl ID	Log2FC	P-value	Gene Name
Gjb2	4.934	0	Gjb2
ENSMUSG00000058354	4.818	0	Krt6a
ENSMUSG00000032348	4.086	4.4323e-320	Gsta4
ENSMUSG00000023041	4.009	2.10363e-292	Krt6b
ENSMUSG00000053797	3.949	0	Krt16
ENSMUSG00000026479	3.942	2.20549e-187	Lamc2
ENSMUSG00000031827	3.597	3.48256e-293	Cotl1
ENSMUSG00000071562	3.573	1.26101e-313	Stfa1
ENSMUSG00000096001	3.472	5.82686e-287	2610528A11Rik
ENSMUSG00000027533	3.236	2.13574e-241	Fabp5
ENSMUSG00000034362	3.186	8.61868e-244	Csta1
ENSMUSG00000056071	3.164	7.94375e-101	S100a9
ENSMUSG00000056054	3.139	4.3608e-80	S100a8
ENSMUSG00000024421	3.109	9.73993e-174	Lama3
ENSMUSG00000028464	3.104	0	Tpm2
ENSMUSG00000071561	3.087	0	Cstdc5
ENSMUSG00000048455	3.028	1.27478e-146	Sprr1b
ENSMUSG00000028645	2.982	0	Slc2a1
ENSMUSG00000028435	2.978	5.70184e-313	Aqp3
ENSMUSG00000001473	2.967	1.45858e-299	Tubb6
ENSMUSG00000045545	2.966	5e-323	Krt14
ENSMUSG00000026547	2.938	0	Tagln2
ENSMUSG00000025161	2.865	9.87386e-255	Slc16a3
ENSMUSG00000003955	2.857	4.37345e-278	Fam162a
ENSMUSG00000025481	2.847	9.50265e-306	Urah
ENSMUSG00000026639	2.808	2.50879e-156	Lamb3
ENSMUSG00000001025	2.8	1.12763e-236	S100a6
ENSMUSG00000063229	2.798	0	Ldha
ENSMUSG00000076441	2.762	2.97646e-261	Ass1
ENSMUSG00000047281	2.756	3.25204e-286	Sfn
ENSMUSG00000094733	2.744	5.04402e-244	Csta3
ENSMUSG00000035557	2.733	2.10292e-227	Krt17
ENSMUSG00000046402	2.72	1.4962e-177	Rbp1
ENSMUSG00000027111	2.716	1.61042e-182	Itga6
ENSMUSG00000028367	2.695	2.54955e-312	Txn1
ENSMUSG00000011752	2.627	1.38778e-300	Pgam1
ENSMUSG00000020758	2.618	2.53258e-169	Itgb4
ENSMUSG00000026420	2.609	7.42199e-119	Il24
Dsg3	2.6	0	Dsg3
ENSMUSG00000046259	2.592	8.00555e-149	Sprr2h
ENSMUSG00000063524	2.556	1.11097e-293	Eno1
ENSMUSG00000057666	2.547	1.58512e-286	Gapdh
ENSMUSG00000026202	2.545	2.4556e-282	Tuba4a
ENSMUSG00000029762	2.534	5.00803e-286	Akr1b8
ENSMUSG00000032294	2.532	1.00927e-304	Pkm
ENSMUSG00000062070	2.484	2.45149e-294	Pgk1
ENSMUSG00000022995	2.461	2.33616e-315	Enah
ENSMUSG00000022902	2.453	2.31406e-160	Stfa2
ENSMUSG00000025809	2.45	5.20013e-142	Itgb1
ENSMUSG00000023456	2.449	6.92864e-288	Tpi1
ENSMUSG00000074445	2.448	9.67275e-213	Sprr2a3
ENSMUSG00000030693	2.447	2.38021e-160	Klk10
ENSMUSG00000020592	2.44	2.48808e-289	Sdc1
ENSMUSG00000043091	2.416	1.30104e-232	Tuba1c
ENSMUSG00000001794	2.385	3.92386e-311	Capns1
ENSMUSG00000032454	2.379	1.22103e-175	Rbp2
ENSMUSG00000004885	2.377	3.28877e-111	Crabp2
ENSMUSG00000022451	2.372	2.94917e-275	Twf1
ENSMUSG00000032231	2.369	1.2485e-279	Anxa2
ENSMUSG00000042688	2.347	8.5326e-284	Mapk6
Odc1	2.339	6.44189e-127	Odc1
ENSMUSG00000024026	2.31	3.01805e-300	Glo1
ENSMUSG00000020803	2.291	2.34663e-286	Txndc17
ENSMUSG00000006589	2.29	1.13923e-272	Aprt
ENSMUSG00000024810	2.29	3.82519e-65	Il33
ENSMUSG00000067780	2.289	2.25349e-208	Pi15
ENSMUSG00000061527	2.286	5.19661e-217	Krt5
ENSMUSG00000018293	2.282	6.64718e-274	Pfn1
ENSMUSG00000008136	2.279	4.4e-323	Fhl2
ENSMUSG00000015143	2.274	9.87426e-287	Actn1
ENSMUSG00000048373	2.272	1.17832e-217	Fgfbp1
ENSMUSG00000028776	2.26	2.88213e-234	Tinagl1
ENSMUSG00000026509	2.25	6.98706e-297	Capn2
ENSMUSG00000031490	2.248	3.9043e-292	Eif4ebp1
ENSMUSG00000029580	2.224	1.2897e-260	Actb
ENSMUSG00000041736	2.219	1.16476e-276	Tspo
ENSMUSG00000063856	2.21	1.60801e-255	Gpx1
ENSMUSG00000030695	2.196	1.8661e-263	Aldoa
ENSMUSG00000057454	2.194	6.71464e-196	Lypd3
ENSMUSG00000015932	2.18	2.15114e-248	Dstn
ENSMUSG00000031328	2.148	3.89683e-268	Flna
ENSMUSG00000034634	2.142	2.38746e-131	Ly6d
ENSMUSG00000020277	2.136	1.31059e-267	Pfkl
Egln3	2.135	2.13351e-172	Egln3
ENSMUSG00000029761	2.125	5.86912e-181	Cald1
ENSMUSG00000030560	2.115	5.1102e-179	Ctsc
ENSMUSG00000068748	2.109	2.96012e-254	Ptprz1
ENSMUSG00000031799	2.108	5.18094e-267	Tpm4
ENSMUSG00000025068	2.104	2.18076e-274	Gsto1
Cfl1	2.1	5.74981e-269	Cfl1
ENSMUSG00000032324	2.084	2.03738e-235	Tspan3
ENSMUSG00000024486	2.079	1.863e-128	Hbegf
ENSMUSG00000062991	2.07	7.78801e-137	Nrg1
ENSMUSG00000036752	2.069	9.86892e-175	Tubb4b
ENSMUSG00000062380	2.068	5.51427e-155	Tubb3
ENSMUSG00000035020	2.061	1.16866e-120	Epgn
ENSMUSG00000074457	2.057	1.47744e-226	S100a16
ENSMUSG00000021591	2.055	4.5424e-204	Glrx
ENSMUSG00000035493	2.04	3.94678e-188	Tgfbi
ENSMUSG00000056737	2.039	6.08011e-240	Capg
ENSMUSG00000075602	2.035	3.8677e-205	Ly6a
ENSMUSG00000060147	2.031	8.65796e-208	Serpinb6a
ENSMUSG00000078453	2.02	8.44856e-256	Abracl
ENSMUSG00000021109	2.009	3.83468e-287	Hif1a
ENSMUSG00000063694	1.998	4.4404e-263	Cycs
ENSMUSG00000031765	1.998	2.04995e-168	Mt1
ENSMUSG00000022468	1.997	1.57254e-211	Endou
ENSMUSG00000044748	1.993	8.00303e-147	Defb1
ENSMUSG00000038034	1.99	2.29699e-246	Igsf8
ENSMUSG00000041959	1.982	6.98353e-190	S100a10
ENSMUSG00000033161	1.98	1.10914e-263	Atp1a1
ENSMUSG00000008036	1.979	5.10675e-262	Ap2s1
ENSMUSG00000038412	1.979	1.06413e-224	Higd1a
ENSMUSG00000001403	1.972	1.36975e-104	Ube2c
ENSMUSG00000029430	1.961	2.52408e-232	Ran
ENSMUSG00000005732	1.956	6.86258e-232	Ranbp1
ENSMUSG00000041782	1.954	3.43896e-240	Lad1
ENSMUSG00000023232	1.95	9.62448e-285	Serinc2
ENSMUSG00000021486	1.935	5.75432e-253	Prelid1
ENSMUSG00000020649	1.922	3.98286e-208	Rrm2
ENSMUSG00000071547	1.917	5.10901e-268	Nt5dc2
ENSMUSG00000005103	1.914	1.01928e-268	Wdr1
ENSMUSG00000044734	1.911	4.79306e-195	Serpinb1a
ENSMUSG00000051223	1.91	2.33358e-239	Bzw1
ENSMUSG00000023905	1.904	8.19896e-179	Tnfrsf12a
ENSMUSG00000024048	1.902	8.02686e-269	Myl12a
ENSMUSG00000034006	1.898	4.16859e-258	Slc66a2
ENSMUSG00000008475	1.898	1.16729e-244	Arpc5
ENSMUSG00000062825	1.895	7.38966e-221	Actg1
ENSMUSG00000022443	1.887	7.71766e-223	Myh9
ENSMUSG00000050737	1.886	1.0137e-206	Ptges
ENSMUSG00000025064	1.885	5.20449e-109	Col17a1
ENSMUSG00000005481	1.883	1.99229e-242	Ddx39
ENSMUSG00000027907	1.878	4.7375e-235	S100a11
ENSMUSG00000029378	1.875	2.89668e-143	Areg
ENSMUSG00000003814	1.872	7.28194e-240	Calr
ENSMUSG00000009013	1.858	2.96085e-236	Dynll1
Gjb6	1.857	2.73132e-147	Gjb6
ENSMUSG00000078812	1.851	3.64568e-235	Eif5a
ENSMUSG00000030748	1.849	3.33383e-247	Il4ra
ENSMUSG00000031996	1.849	5.01865e-173	Aplp2
ENSMUSG00000028044	1.841	9.36297e-162	Cks1b
ENSMUSG00000046908	1.835	6.0547e-260	Ltb4r1
ENSMUSG00000029484	1.828	8.67887e-192	Anxa3
ENSMUSG00000029101	1.827	2.02253e-250	Rgs12
ENSMUSG00000027613	1.827	3.71888e-228	Eif6
ENSMUSG00000020089	1.827	2.0865e-226	Ppa1
ENSMUSG00000031762	1.819	2.48068e-126	Mt2
ENSMUSG00000031672	1.816	1.06834e-256	Got2
ENSMUSG00000029581	1.816	2.07636e-224	Fscn1
ENSMUSG00000056671	1.816	4.26921e-203	Prelid2
ENSMUSG00000001435	1.816	2.03022e-144	Col18a1
ENSMUSG00000042306	1.806	2.08393e-217	S100a14
ENSMUSG00000091537	1.8	8.23824e-249	Tma7
ENSMUSG00000026278	1.799	1.41229e-217	Bok
ENSMUSG00000038400	1.798	7.40621e-198	Pmepa1
ENSMUSG00000050359	1.796	7.76118e-25	Sprr1a
ENSMUSG00000036427	1.795	7.30841e-235	Gpi1
ENSMUSG00000028873	1.795	2.43994e-135	Cdca8
ENSMUSG00000037601	1.784	1.78937e-222	Nme1
ENSMUSG00000026305	1.784	8.0131e-207	Lrrfip1
ENSMUSG00000029642	1.783	2.79517e-231	Polr1d
ENSMUSG00000090841	1.781	2.21805e-248	Myl6
ENSMUSG00000024659	1.777	3.53436e-153	Anxa1
ENSMUSG00000005087	1.772	9.4751e-241	Cd44
ENSMUSG00000040385	1.769	3.44579e-243	Ppp1ca
ENSMUSG00000025651	1.769	2.55821e-211	Uqcrc1
ENSMUSG00000002797	1.769	9.01286e-210	Ggct
ENSMUSG00000040824	1.765	5.33586e-243	Snrpd2
ENSMUSG00000018821	1.765	8.35554e-203	Avpi1
ENSMUSG00000026234	1.762	2.47607e-196	Ncl
ENSMUSG00000017716	1.762	1.46904e-130	Birc5
ENSMUSG00000027940	1.757	6.23321e-229	Tpm3
ENSMUSG00000028382	1.755	4.69959e-234	Ptbp3
ENSMUSG00000031207	1.755	2.13228e-180	Msn
ENSMUSG00000078566	1.749	1.0928e-125	Bnip3
ENSMUSG00000039640	1.746	1.56294e-208	Mrpl12
ENSMUSG00000048007	1.739	3.87744e-216	Timm8a1
ENSMUSG00000074656	1.738	3.71976e-245	Eif2s2
ENSMUSG00000029467	1.737	1.35068e-244	Atp2a2
ENSMUSG00000055044	1.736	1.16558e-175	Pdlim1
ENSMUSG00000053716	1.735	1.07725e-192	Dusp7
ENSMUSG00000048076	1.734	2.57316e-235	Arf1
ENSMUSG00000026880	1.733	7.09504e-238	Stom
ENSMUSG00000032366	1.733	7.06926e-144	Tpm1
ENSMUSG00000022587	1.732	6.65527e-169	Ly6e
ENSMUSG00000026341	1.731	8.60449e-231	Actr3
ENSMUSG00000022565	1.73	2.86328e-147	Plec
ENSMUSG00000045349	1.729	1.31119e-213	Sh2d5
ENSMUSG00000054766	1.728	2.61661e-203	Set
ENSMUSG00000028649	1.725	3.44216e-192	Macf1
ENSMUSG00000001175	1.724	1.065e-211	Calm1
ENSMUSG00000026421	1.724	7.94302e-195	Csrp1
ENSMUSG00000079426	1.721	9.32454e-235	Arpc4
ENSMUSG00000021996	1.719	1.71016e-224	Esd
ENSMUSG00000057113	1.719	3.31766e-203	Npm1
ENSMUSG00000018417	1.719	9.44135e-170	Myo1b
ENSMUSG00000031910	1.717	3.86125e-181	Has3
ENSMUSG00000029198	1.709	1.17409e-224	Grpel1
ENSMUSG00000079523	1.707	1.83517e-207	Tmsb10

## Sheet: C4_Basal4
Table S3 Marker genes of basal keratinocyte clusters (C4_Basal4)
Ensembl ID	Log2FC	P-value	Gene Name
ENSMUSG00000062345	3.293	0	Serpinb2
ENSMUSG00000026535	2.962	0	Ifi202b
ENSMUSG00000034640	2.456	0	Tiparp
ENSMUSG00000020427	2.35	3.23085e-142	Igfbp3
ENSMUSG00000026628	2.241	0	Atf3
ENSMUSG00000032068	2.206	0	Plet1
ENSMUSG00000050359	2.167	6.24401e-79	Sprr1a
ENSMUSG00000032487	2.154	6.87e-322	Ptgs2
Ovol1	2.148	0	Ovol1
ENSMUSG00000001627	2.135	0	Ifrd1
Klf5	2.098	0	Klf5
ENSMUSG00000015312	2.011	0	Gadd45b
ENSMUSG00000007379	1.998	0	Dennd2c
ENSMUSG00000003752	1.978	0	Itpkc
ENSMUSG00000026638	1.969	0	Irf6
ENSMUSG00000017144	1.886	0	Rnd3
Fosl1	1.843	0	Fosl1
ENSMUSG00000036894	1.787	0	Rap2b
ENSMUSG00000047501	1.766	1.5745e-152	Cldn4
ENSMUSG00000034751	1.714	0	Mast4
ENSMUSG00000012350	1.701	0	Ehf
Adrb2	1.7	0	Adrb2
ENSMUSG00000062300	1.648	0	Nectin2
Trib1	1.617	0	Trib1
ENSMUSG00000035356	1.606	1.67042e-258	Nfkbiz
ENSMUSG00000023034	1.603	4.60843e-256	Nr4a1
ENSMUSG00000022512	1.595	0	Cldn1
ENSMUSG00000026510	1.581	0	Trp53bp2
ENSMUSG00000026235	1.529	1.29539e-312	Epha4
ENSMUSG00000024014	1.523	0	Pim1
Ptger4	1.52	0	Ptger4
ENSMUSG00000079144	1.515	7.74613e-283	A130010J15Rik
ENSMUSG00000022895	1.51	0	Ets2
ENSMUSG00000020889	1.505	3.957e-321	Nr1d1
ENSMUSG00000028525	1.496	9.4926e-278	Pde4b
Tacstd2	1.472	4.05e-321	Tacstd2
ENSMUSG00000066278	1.431	0	Vps37b
ENSMUSG00000035498	1.43	0	Cdcp1
ENSMUSG00000092274	1.43	9.06995e-245	Neat1
ENSMUSG00000027829	1.429	3.0845e-320	Ccnl1
ENSMUSG00000040435	1.424	0	Ppp1r15a
ENSMUSG00000020275	1.415	1.8e-322	Rel
Tjp2	1.411	0	Tjp2
ENSMUSG00000024190	1.409	2.5547e-242	Dusp1
ENSMUSG00000090394	1.409	1.59353e-207	4930523C07Rik
ENSMUSG00000036478	1.401	6.35812e-308	Btg1
ENSMUSG00000027806	1.4	1.26e-321	Tsc22d2
ENSMUSG00000024235	1.399	0	Map3k8
ENSMUSG00000005483	1.392	6.21707e-161	Dnajb1
Tfap2a	1.384	1.1879e-319	Tfap2a
ENSMUSG00000005251	1.383	0	Ripk4
ENSMUSG00000027803	1.382	0	Wwtr1
Dnajb4	1.359	3.58176e-315	Dnajb4
ENSMUSG00000032515	1.355	0	Csrnp1
ENSMUSG00000032220	1.352	3.87593e-305	Myo1e
ENSMUSG00000028893	1.341	1.49892e-304	Sesn2
ENSMUSG00000019947	1.335	1.46728e-272	Arid5b
ENSMUSG00000040128	1.329	1.06374e-287	Pnrc1
Nfkbia	1.314	5.37468e-213	Nfkbia
ENSMUSG00000052684	1.308	4.55671e-242	Jun
ENSMUSG00000006445	1.304	0	Epha2
ENSMUSG00000038806	1.303	6.49861e-302	Sde2
ENSMUSG00000028780	1.302	2.40957e-168	Sema3c
ENSMUSG00000048546	1.299	5.91311e-297	Tob2
ENSMUSG00000060012	1.294	5.28111e-252	Kif13b
ENSMUSG00000059474	1.286	7.32438e-313	Mbtd1
ENSMUSG00000015619	1.284	2.63363e-259	Gata3
ENSMUSG00000047730	1.273	2.13781e-172	Fcgbp
ENSMUSG00000000078	1.265	2.78178e-285	Klf6
ENSMUSG00000029378	1.256	1.87373e-116	Areg
ENSMUSG00000024379	1.251	1.08248e-98	Tslp
ENSMUSG00000039219	1.25	1.16045e-253	Arid4b
ENSMUSG00000032238	1.248	1.38191e-296	Rora
ENSMUSG00000035399	1.244	1.51046e-285	Oser1
ENSMUSG00000022864	1.222	2.00411e-239	D16Ertd472e
ENSMUSG00000003382	1.22	1.13488e-232	Etv3
ENSMUSG00000035828	1.216	2.34881e-243	Pim3
ENSMUSG00000024750	1.214	1.01733e-275	Zfand5
ENSMUSG00000098188	1.194	5.62038e-294	Sowahc
ENSMUSG00000025239	1.178	2.75883e-223	Limd1
Baz1a	1.162	2.7519e-251	Baz1a
ENSMUSG00000024042	1.157	2.23723e-265	Sik1
ENSMUSG00000040451	1.155	1.94866e-216	Sgms1
ENSMUSG00000017418	1.149	7.41438e-274	Arl5b
ENSMUSG00000090946	1.137	2.28711e-171	Ccdc71l
ENSMUSG00000070544	1.136	2.39097e-247	Top1
ENSMUSG00000022865	1.131	6.06807e-256	Cxadr
ENSMUSG00000039238	1.13	1.17071e-106	Zfp750
ENSMUSG00000030103	1.129	1.65405e-184	Bhlhe40
ENSMUSG00000039782	1.126	5.86046e-207	Cpeb2
ENSMUSG00000027358	1.123	1.64175e-218	Bmp2
ENSMUSG00000024589	1.12	1.99752e-282	Nedd4l
ENSMUSG00000041328	1.111	7.55176e-223	Pcf11
ENSMUSG00000026670	1.108	4.11968e-195	Uap1
ENSMUSG00000030232	1.104	1.57948e-249	Aebp2
Klf9	1.103	1.1708e-216	Klf9
ENSMUSG00000000303	1.082	1.60886e-246	Cdh1
ENSMUSG00000030779	1.08	5.83678e-169	Rbbp6
ENSMUSG00000038894	1.076	5.37407e-238	Irs2
ENSMUSG00000025283	1.075	1.11221e-154	Sat1
ENSMUSG00000021678	1.07	2.0043e-221	F2rl1
ENSMUSG00000062825	1.057	2.49722e-153	Actg1
ENSMUSG00000008348	1.053	2.47139e-203	Ubc
ENSMUSG00000014905	1.052	1.47339e-224	Dnajb9
ENSMUSG00000021701	1.052	6.89407e-193	Plk2
ENSMUSG00000041607	1.051	1.14011e-248	Mbp
ENSMUSG00000050565	1.047	1.37502e-238	Tor1aip2
ENSMUSG00000049516	1.047	1.80678e-238	Spty2d1
ENSMUSG00000030790	1.042	1.93227e-175	Adm
ENSMUSG00000018476	1.021	2.06971e-196	Kdm6b
ENSMUSG00000025612	1.018	2.55084e-182	Bach1
ENSMUSG00000028128	1.018	5.49233e-128	F3
ENSMUSG00000048490	1.014	1.48206e-160	Nrip1
ENSMUSG00000017009	1.013	1.02305e-118	Sdc4
ENSMUSG00000027333	1.012	9.23622e-187	Smox
ENSMUSG00000027171	1.01	1.38687e-211	Prrg4
ENSMUSG00000024810	1	1.5549e-116	Il33
ENSMUSG00000062604	0.997	8.6519e-223	Srpk2
ENSMUSG00000035992	0.985	1.67509e-195	Fnip1
ENSMUSG00000001156	0.983	6.3846e-152	Mxd1
ENSMUSG00000054499	0.978	4.16991e-249	Dedd2
ENSMUSG00000036461	0.978	7.31966e-191	Elf1
ENSMUSG00000021868	0.978	3.90916e-123	Ppif
ENSMUSG00000028849	0.976	4.96724e-172	Map7d1
ENSMUSG00000022601	0.975	6.80745e-223	Zbtb11
ENSMUSG00000037266	0.975	3.11692e-159	Rsrp1
ENSMUSG00000101609	0.974	3.35081e-94	Kcnq1ot1
ENSMUSG00000021215	0.971	3.20216e-192	Net1
ENSMUSG00000023067	0.97	5.88823e-162	Cdkn1a
ENSMUSG00000108414	0.965	1.55001e-134	Snhg1
ENSMUSG00000022858	0.961	4.26537e-211	Tra2b
ENSMUSG00000026819	0.959	3.44763e-205	Slc25a25
Gramd3	0.959	1.87488e-182	Gramd3
ENSMUSG00000021109	0.957	7.5385e-176	Hif1a
ENSMUSG00000023075	0.95	1.27704e-166	Akirin1
ENSMUSG00000047407	0.945	2.60854e-173	Tgif1
ENSMUSG00000028262	0.939	9.2011e-154	Clca3a2
ENSMUSG00000051022	0.934	8.09287e-136	Hs3st1
ENSMUSG00000085795	0.933	3.15442e-118	Zfp703
ENSMUSG00000045502	0.932	1.46147e-177	Hcar2
ENSMUSG00000003032	0.932	1.97635e-129	Klf4
ENSMUSG00000022462	0.929	2.87218e-204	Slc38a2
ENSMUSG00000057454	0.927	2.6263e-223	Lypd3
ENSMUSG00000040423	0.927	1.27422e-183	Rc3h1
ENSMUSG00000021509	0.925	8.13887e-227	Slc25a48
ENSMUSG00000018143	0.925	2.55088e-220	Mafk
ENSMUSG00000039985	0.917	9.84076e-126	Sinhcaf
ENSMUSG00000055994	0.916	3.30117e-229	Nod2
ENSMUSG00000024521	0.915	1.24625e-180	Pmaip1
ENSMUSG00000040297	0.915	1.7434e-174	Suco
ENSMUSG00000024486	0.915	8.2891e-173	Hbegf
ENSMUSG00000061589	0.913	1.04561e-192	Dot1l
ENSMUSG00000021411	0.907	9.43222e-122	Pxdc1
ENSMUSG00000042406	0.903	1.59812e-163	Atf4
ENSMUSG00000020064	0.9	2.03424e-166	Herc4
ENSMUSG00000028788	0.899	7.60329e-167	Ptp4a2
ENSMUSG00000033508	0.896	1.89865e-31	Asprv1
ENSMUSG00000005087	0.89	6.86724e-170	Cd44
ENSMUSG00000038615	0.889	2.73441e-164	Nfe2l1
ENSMUSG00000017677	0.887	3.53058e-176	Wsb1
ENSMUSG00000078671	0.883	6.01279e-147	Chd2
ENSMUSG00000031381	0.882	2.98312e-210	Piga
ENSMUSG00000028163	0.878	8.27403e-170	Nfkb1
ENSMUSG00000031762	0.878	8.83326e-151	Mt2
ENSMUSG00000035569	0.872	3.16398e-155	Ankrd11
ENSMUSG00000047446	0.871	5.30734e-145	Arl4a
ENSMUSG00000000184	0.87	2.5303e-88	Ccnd2
ENSMUSG00000015839	0.867	3.23656e-166	Nfe2l2
ENSMUSG00000026981	0.867	6.20985e-142	Il1rn
ENSMUSG00000032265	0.86	2.07477e-150	Tent5a
ENSMUSG00000019850	0.859	8.66072e-119	Tnfaip3
ENSMUSG00000037857	0.858	2.63845e-155	Nufip2
ENSMUSG00000047821	0.851	1.58566e-174	Trim16
ENSMUSG00000033352	0.846	5.11247e-156	Map2k4
ENSMUSG00000040152	0.834	8.5461e-44	Thbs1
ENSMUSG00000027859	0.832	9.38761e-166	Ngf
ENSMUSG00000029817	0.826	3.05113e-134	Tra2a
ENSMUSG00000018821	0.825	3.07284e-153	Avpi1
Jarid2	0.824	3.4658e-156	Jarid2
ENSMUSG00000053716	0.816	4.54034e-167	Dusp7
ENSMUSG00000025981	0.814	2.19327e-173	Coq10b
ENSMUSG00000005125	0.814	6.49675e-161	Ndrg1
ENSMUSG00000028126	0.811	2.5611e-175	Pip5k1a
ENSMUSG00000026923	0.809	8.21648e-115	Notch1
ENSMUSG00000022272	0.807	8.29325e-144	Myo10
ENSMUSG00000042677	0.806	3.55152e-142	Zc3h12a
ENSMUSG00000037188	0.805	3.47726e-114	Grhl3
ENSMUSG00000003541	0.804	2.48788e-210	Ier3
ENSMUSG00000020250	0.8	1.8697e-112	Txnrd1
ENSMUSG00000000628	0.794	4.23427e-141	Hk2
ENSMUSG00000020184	0.793	2.58737e-74	Mdm2
ENSMUSG00000035621	0.792	2.07589e-160	Midn
ENSMUSG00000056313	0.792	3.48231e-123	Tcim
ENSMUSG00000052397	0.789	8.83344e-178	Ezr
ENSMUSG00000018239	0.789	1.56064e-146	Zcchc10
Fbxo34	0.788	1.02975e-163	Fbxo34
ENSMUSG00000030655	0.785	3.54472e-140	Smg1
ENSMUSG00000053113	0.785	7.03907e-58	Socs3
ENSMUSG00000059811	0.78	4.2841e-153	Atl2
ENSMUSG00000035011	0.779	2.91782e-135	Zbtb7a

## Sheet: GO anlaysis
Table S3 GO and KEGG analysis of marker genes of C2, C3, and C4 clusters.
	Term	Overlap	P value	q value	genes
C2 function	microtubule cytoskeleton organization involved in mitosis (GO:1902850)	29	3.4906e-35	2.90069e-32	CDCA8;KIF11;PMF1;AURKB;AURKA;CDC20;CCNB1;STMN1;NUF2;NUSAP1;BUB3;CENPU;PLK1;KNL1;NDC80;SGO1;CENPE;CENPF;CENPH;INCENP;CENPK;TACC3;BIRC5;CENPM;CENPP;CENPQ;RAN;SPC24;SPC25
	mitotic spindle organization (GO:0007052)	30	5.66197e-34	2.35255e-31	CDCA8;KIF11;PMF1;AURKB;AURKA;CDC20;CCNB1;STMN1;NUF2;BUB3;CENPU;PLK1;KIF23;KNL1;NDC80;SGO1;TPX2;CENPE;CENPF;CENPH;INCENP;PRC1;CENPK;BIRC5;CENPM;CENPP;CENPQ;SPC24;RAN;SPC25
	mitotic sister chromatid segregation (GO:0000070)	22	2.60564e-26	7.21762e-24	CDCA5;PLK1;NCAPG2;CDCA8;NCAPG;KIF23;KIF22;SMC4;NCAPH;NDC80;SMC2;SGO1;CENPE;CCNB1;PRC1;RAD21;CENPK;NUSAP1;CDK1;NCAPD2;NCAPD3;RAN
	chromosome condensation (GO:0030261)	14	1.30999e-19	2.72151e-17	TOP2A;CDCA5;NCAPG2;PLK1;NCAPG;SMC4;NCAPH;SMC2;CCNB1;INCENP;NUSAP1;CDK1;NCAPD2;NCAPD3
	mitotic chromosome condensation (GO:0007076)	12	3.1924e-19	5.30577e-17	CCNB1;CDCA5;NCAPG2;PLK1;NUSAP1;CDK1;NCAPG;NCAPD2;NCAPD3;SMC4;NCAPH;SMC2
C3 function	pyruvate metabolic process (GO:0006090)	12	6.73845e-15	7.8166e-12	LDHA;PFKL;TPI1;PKM;PGAM1;GLO1;BSG;PGK1;ENO1;ALDOA;SLC16A3;GAPDH
	glycolytic process (GO:0006096)	9	5.19109e-13	3.01083e-10	LDHA;PFKL;TPI1;PKM;PGAM1;PGK1;ENO1;ALDOA;GAPDH
	canonical glycolysis (GO:0061621)	8	5.50897e-12	1.5976e-09	PFKL;TPI1;PKM;PGAM1;PGK1;ENO1;ALDOA;GAPDH
	glucose catabolic process to pyruvate (GO:0061718)	8	5.50897e-12	1.5976e-09	PFKL;TPI1;PKM;PGAM1;PGK1;ENO1;ALDOA;GAPDH
	glycolytic process through glucose-6-phosphate (GO:0061620)	8	8.05038e-12	1.86769e-09	PFKL;TPI1;PKM;PGAM1;PGK1;ENO1;ALDOA;GAPDH
C4 function	TNF signaling pathway	7	2.17677e-05	0.00378759	NFKBIA;JUN;TNFAIP3;MAP3K8;NOD2;PTGS2;NFKB1
	IL-17 signaling pathway	6	7.61588e-05	0.00473799	FOSL1;NFKBIA;JUN;TNFAIP3;PTGS2;NFKB1
	Apoptosis	6	0.000713187	0.0310237	NFKBIA;JUN;GADD45B;PMAIP1;NGF;NFKB1
	NF-kappa B signaling pathway	5	0.00112472	0.0391401	NFKBIA;GADD45B;TNFAIP3;PTGS2;NFKB1
	MAPK signaling pathway	8	0.00172377	0.042848	NR4A1;JUN;GADD45B;DUSP1;MAP3K8;NGF;NFKB1;EPHA2
