# Supplementary material for: The lncRNA SNHG26 drives the inflammatory-to-proliferative state transition of keratinocyte progenitor cells during wound healing
Source: Research Square preprint supplement (doi:10.21203/rs.3.rs-3810067/v1), 2024-03-04
Supplement: Supplementary file 5 [file d448180b5b719d95be70e732.xlsx]

## Sheet: Sheet2
Table S2. Differentially expressed lncRNAs in human acute wounds.
	Skin1	Skin2	Skin3	Skin4	Skin5	Wound1_1	Wound1_2	Wound1_3	Wound1_4	Wound1_5	Wound7_1	Wound7_2	Wound7_3	Wound7_4	Wound7_5	p value （ONE WAY ANOVA)	FC(Wound1 vs Skin)	FC(Wound7 vs Skin)	Conservation
WDFY3-AS2	0.46494	0.863733	0.88376	0.76601	0.940355	0.259331	0.500904	0.154997	0.170539	0.0287632	0.545088	0.533471	0.137724	0.267736	0.201557	0.005	0.284407	0.430126	Yes
ZFAS1	7.65141	5.99216	6.67431	6.05887	9.88789	14.6752	11.3315	17.0947	14.3917	13.4921	16.1142	20.8426	23.1	17.43	14.7179	0.005	1.95742	2.54255	Yes
LOC101929709	2.16197	1.43861	1.78381	1.1816	0.851519	0.357562	0.29891	0.867193	0.711192	0.660119	0.34343	0.442562	0.349761	0.940599	0.667475	0.003	0.39029	0.369912	Yes
MALAT1	1014.55	769.267	581.017	252.904	793.699	1295.91	1220.2	1089.98	1035.99	897.77	982.898	1142.19	1307.64	972.903	798.951	0.002	1.62391	1.52563	Yes
NOP14-AS1	3.85691	6.51058	5.61606	14.1654	3.80931	2.58553	2.16334	2.97552	2.55489	2.28336	3.20344	2.63558	2.66388	3.3808	3.93816	0.002	0.369944	0.465921	Yes
CRNDE	2.85193	3.18816	2.34107	0.496198	0.416689	3.42744	4.0527	4.12806	4.28271	4.02454	7.28767	5.36578	5.15569	5.96878	3.10675	0.001	2.14282	2.89268	Yes
MEG3	17.56	9.06925	12.1588	2.9797	17.7527	3.96967	4.00133	5.46505	5.61873	5.81473	13.102	6.11703	11.4225	10.7017	11.1449	0.001	0.417831	0.88185	Yes
SNHG15	2.74036	4.67856	4.04737	5.04523	2.59942	10.6634	7.2161	13.6297	17.9003	9.01885	4.06702	4.39164	4.9227	6.11208	5.24912	0.001	3.05732	1.29468	Yes
SNHG26	1.61181	1.37132	0.840329	0.108927	0.260101	4.9958	4.02955	3.01791	3.04807	2.08968	3.00396	2.34836	1.35704	1.15882	1.42884	0.001	4.09805	2.21754	Yes
EIF1B-AS1	0.765198	0.441658	0.607187	0.445408	0.57455	0.225609	0.267402	0.258288	0.106442	0.240893	0.182886	0.284156	0.223315	0.427995	0.434148	0	0.387662	0.547812	Yes
EMX2OS	3.5572	6.84464	7.59112	5.30529	6.03885	0.908411	1.0806	0.794506	1.16244	1.78086	2.04623	1.76707	1.55438	1.1596	1.51993	0	0.195207	0.274301	Yes
GAS5	23.4443	16.6585	26.6432	62.4392	34.4725	13.9155	13.125	18.4562	77.7675	19.6553	14.2034	26.6708	18.7328	96.1727	18.543	0	0.873283	1.06517	Yes
MIR22HG	8.43538	14.7121	9.87776	10.0665	11.515	16.7512	21.1425	21.394	29.9265	22.3216	14.681	15.7355	18.8739	18.0982	18.6706	0	2.04253	1.57598	Yes
NEAT1	255.173	232.569	147.61	197.018	153.466	104.194	100.585	123.781	154.707	125.833	51.8616	103.318	43.8157	72.8205	70.7865	0	0.617851	0.347525	Yes
PVT1	1.01405	2.2846	0.74805	0.712159	0.660455	1.543	2.41164	1.83263	1.96214	1.4555	1.27665	1.1672	1.53277	2.34349	2.17893	0	1.69854	1.56829	Yes
RMRP	10148.9	3700.22	3408.7	1325.92	5022.66	5576.41	12468.6	10254.8	12790.8	15315.5	45819.3	31815.8	33244.8	25917.1	20066	0	2.38944	6.64494	Yes
SNHG1	2.15829	2.06466	2.48019	4.85388e-19	6.57656	9.29897	10.8537	13.6103	15.083	15.3548	8.27932	7.14101	7.4953	8.56583	6.80481	0	4.8345	2.88307	Yes
SNHG12	4.13001	3.54054	1.95257	4.26597	1.5222	7.14961	5.63302	6.56529	8.43541	8.27384	6.22182	3.26098	4.94087	3.177	4.31295	0	2.33966	1.42192	Yes
SNHG6	7.61615	5.19963	4.80389	1.42505	6.93653	16.2986	10.5358	11.3964	10.6828	8.87869	12.7384	16.9045	18.6567	14.9772	10.6726	0	2.22438	2.84626	Yes
SOX9-AS1	0.911104	2.6643	1.09292	0.696504	0.00439002	0.429385	0.909886	8.87927e-06	0.411064	0.00142734	0.000152263	1.03607	0.310461	0.0243264	0.233109	0	0.326262	0.298762	Yes
CNOT11	0.864098	0.439727	0.720223	1.03315	1.54346	1.73957	1.95808	2.31229	2.23016	1.34398	0.711832	0.813444	0.536878	0.949005	0.331539	0.005	2.0832	0.72657	No
FAM66C	2.8502	0.872394	1.9101	1.2221	1.28103	0.12869	0.414997	0.113821	0.135336	0.769819	0.136012	0.135814	0.143388	0.140251	0.441066	0.005	0.192072	0.122487	No
RP11-214O1.2	1.03286	0.596489	0.739988	1.00228	0.518645	4.79502	3.63221	6.32464	5.6672	1.72003	1.63964	2.02981	3.06767	3.65815	3.12778	0.005	5.6909	3.47613	No
SNHG24	0.916975	0.763446	0.884887	0.30801	1.19412	0.606388	1.08623	0.875306	0.939622	0.641642	2.99231	0.780567	3.26717	3.37185	2.37368	0.005	1.0201	3.1434	No
SYNE1-AS1	1.0651	0.986392	1.01073	1.38723	0.32508	0	0.11623	0.0962295	0.45639	0.108095	0.343608	0.572335	0.120867	0.355552	0	0.005	0.162727	0.291623	No
XPOTP1	0.130177	0.831296	1.09373	0.464095	0.587317	0	0	0	0	0	0.156559	0.156203	0	0	0	0.005	0	0.100676	No
AC006273.5	1.8303	2.51187	1.43221	2.51155	1.32346	1.40983e-07	0.386989	1.85143e-05	0.4586	0.361614	0.153142	0.180564	0.235792	0.0797078	0.0198688	0.004	0.125629	0.0696272	No
AC093673.5	0.52692	2.5831	1.40882	1.17184	1.17343	3.69063	4.45809	3.57051	2.63673	2.66231	3.43604	3.43755	3.9097	3.66236	2.37481	0.004	2.47931	2.45049	No
DHRS4-AS1	1.9938	1.42993	1.2167	0.339379	2.01878	1.60212	2.10233	1.8497	1.65863	2.1854	3.40572	2.27487	2.65098	1.72045	2.12628	0.004	1.34287	1.74011	No
LINC00667	7.31543	15.9859	15.0046	20.6745	8.11026	4.7855	5.22557	6.10775	4.99448	7.91542	3.64265	3.72323	3.63413	7.56743	7.59788	0.004	0.432679	0.389999	No
NR2F2-AS1	1.97067	3.2742	1.8014	2.04699	2.06791	3.44945e-24	0.871739	3.53227e-54	0.488445	0.426969	2.47647e-05	0.532426	0.000179346	0.815677	0.399126	0.004	0.160122	0.156564	No
RP3-467L1.4	0.844332	0.401613	0.983626	1.07768	0.46762	0.23347	0.246618	0.0518411	0	0.11545	0.0610931	0.0611851	0.129261	0.38262	0.501142	0.004	0.171497	0.300752	No
RP4-758J18.2	1.96979	2.52429	2.62588	1.90999	1.22531	1.14252	0.793828	1.24186	1.28851	0.863368	1.38404	1.01149	1.26386	1.06444	1.26864	0.004	0.519742	0.584331	No
AC006262.5	1.67869	0.659629	1.62709	2.60911	2.39385	0	0.158184	0.129437	0.462873	0.585446	0	0.154875	0.326987	0.319124	0.878241	0.003	0.148961	0.187239	No
ADAMTS9-AS2	0.375949	1.84763	1.56213	2.46523	1.81075	0.131776	0.0120878	9.62358e-64	1.0717e-143	0.271234	1.09407e-65	0.592365	7.37343e-93	4.98039e-94	0.268993	0.003	0.0514902	0.106846	No
CTB-55O6.12	1.99384	1.17528	1.66205	3.37439	1.33741	1.35217	1.19393	1.52029	0.910139	0.866255	1.51689	1.36705	0.644257	2.31672	1.36645	0.003	0.612261	0.755673	No
LINC00998	4.28054	3.3535	0.919825	2.31421e-05	5.1122	5.80437	8.95392	7.7246	3.67075	5.67843	10.8239	10.9339	11.5759	4.69654	11.5988	0.003	2.32927	3.63155	No
MIR4689	0.501757	0.441407	0.689622	1.25893	0.567956	0.136143	0.175072	0.225693	0.276398	0.265287	0.0684307	0.128485	0.0989401	0.176678	0.145035	0.003	0.311762	0.178505	No
OSMR-AS1	0.573879	0.661711	0.540189	0.250711	0.34668	1.5577	1.76701	1.33234	0.965201	2.16802	1.14724	1.33042	1.53311	0.693376	0.643964	0.003	3.28264	2.25357	No
PID1	2.48841	1.62615	0.904474	0.283025	1.70765	6.52201	5.70396	7.26936	5.69467	1.99233	1.73646	1.68681	2.01915	1.21917	1.85787	0.003	3.87781	1.21538	No
RP1-117B12.4	1.36627	1.32183	0.810271	3.27693	1.08407	4.33516	3.29309	4.61667	3.85755	3.57854	3.4097	2.57861	2.64343	3.62947	2.41842	0.003	2.50415	1.86779	No
RP11-295G20.2	4.99631	1.68329	2.90722	3.28791	2.8149	22.1104	14.2296	16.6351	11.3769	9.24204	16.1463	7.89432	6.37155	7.65918	6.35282	0.003	4.69062	2.83144	No
RP11-343L5.2	0.822071	0.653735	0.266137	0	1.13701	1.9041	2.23797	1.87769	1.74434	1.03949	0.563064	0.887346	1.02277	1.18211	1.08357	0.003	3.05791	1.64604	No
RP11-373D23.2	17.9467	3.35998	5.69171	2.92032	8.2726	27.3049	29.2221	21.6984	29.5442	18.4304	27.377	15.8126	15.4303	9.76963	15.8652	0.003	3.30442	2.20612	No
RP11-440D17.3	1.5714	1.99344	2.15129	2.77012	1.39423	1.30425	1.06968	0.775051	0.681525	0.620878	1.46953	0.889891	1.0697	1.24559	0.884297	0.003	0.450523	0.562625	No
RP11-631N16.4	0.51128	0.784047	0	9.9266e-104	0.840227	3.87643	2.29775	3.34815	1.83262	0.894367	3.15853	3.37495	4.08658	2.14358	2.4683	0.003	5.7359	7.13255	No
RP11-77H9.2	1.87763	2.28908	1.67749	1.49233	2.06266	1.13546	0.791557	1.47126	1.34445	1.49455	1.05383	0.889833	1.24868	1.22434	1.19504	0.003	0.663597	0.597043	No
RP11-92K15.3	1.35443	0.804405	1.50629	2.37386	2.01792	0.202239	0	0.447918	0.530524	0.100497	0.106467	0.212873	0.449576	0.220624	0.867128	0.003	0.159016	0.230444	No
RP5-1057I20.4	2.39416	1.13725	2.20195	1.71137	1.69286	0.741031	0.866068	0.439234	0.816802	0.772073	0.68783	0.603188	0.773786	0.900129	1.27313	0.003	0.39783	0.463805	No
SNHG8	34.4777	43.5903	44.6082	63.2784	37.5424	62.0216	47.8394	60.8545	51.8678	67.7006	36.9669	28.609	23.0456	27.4136	35.9502	0.003	1.29883	0.680033	No
TMEM147-AS1	2.12784	2.07837	1.93762	2.09719	2.15183	1.31927	0.966622	1.73551	1.63205	1.33928	0.588756	0.711499	0.796865	1.23323	1.00419	0.003	0.672841	0.417069	No
TP53TG1	3.25516	3.13641	5.08565	4.65445	5.52798	1.44934	0.753589	1.22023	0.524741	1.79615	4.05888	5.22955	4.51741	3.1216	4.02916	0.003	0.265196	0.967541	No
VPS9D1-AS1	1.36179	1.53001	0.691012	2.17647	0.691832	3.41756	3.12529	3.89798	4.13916	4.45482	1.53045	1.46305	0.633542	0.954628	1.16412	0.003	2.95062	0.890666	No
WFDC21P	30.506	21.3898	29.7816	29.5196	25.6848	2.72659	7.03569	7.50564	3.70682	18.1748	14.4066	7.60428	6.58936	9.13404	11.6814	0.003	0.28601	0.36101	No
AP002954.3	1.84477	3.03166	2.21386	2.05802	1.69797	0.785292	0.443586	0.913635	1.70164	0.982585	0.409399	0.820989	0.967486	0.990967	1.5832	0.002	0.445013	0.43997	No
BRD9	0.93887	0.832172	0.65179	0.987005	0.682378	0.425881	0.528352	0.746714	0.887451	0.471417	0.249203	0.277827	0.513747	0.305843	0.263165	0.002	0.747716	0.393377	No
CTD-2033D15.2	0.941586	1.51416	1.69314	0	1.67262	27.7242	17.9302	27.5135	19.3935	9.03651	29.7942	21.3454	20.6924	13.8459	9.38692	0.002	17.4522	16.3299	No
GMDS-AS1	2.51419	2.9006	2.47698	3.08757	2.12727	0.846685	1.04264	1.03672	1.24899	1.11876	0.769144	1.11919	0.727263	1.41304	1.29862	0.002	0.403903	0.406456	No
LINC01006	0.704193	1.13273	0.911558	0.852641	1.102	0.562691	0.850833	0.913833	0.678143	0.827667	0.497653	0.599094	0.7668	0.686281	0.960637	0.002	0.815026	0.746412	No
LINC01140	0.601594	1.37902	1.85208	0.464318	1.89608	1.94729	3.46166	4.79752	2.91832	2.85752	4.26083	4.90998	5.66901	2.79241	5.16613	0.002	2.58067	3.68126	No
LRRC75A-AS1	62.427	49.7285	56.1468	40.3897	69.5789	58.6961	52.1708	46.8197	51.7547	69.1592	75.8944	86.407	64.7771	74.6416	74.5046	0.002	1.00118	1.35201	No
NRSN2-AS1	0.952105	0.000563285	0.619937	1.7974e-25	0.910124	0.403269	0.784574	0.657559	0.167738	0.349138	0.635474	0.458124	0.454714	1.55983e-68	1.27165	0.002	0.951484	1.13583	No
OLMALINC	0.963853	0.675954	0.663549	0.407637	0.830917	0.278052	0.134541	0.247875	0.225779	0.342056	0.443486	0.339012	0.0852539	0.290405	0.256564	0.002	0.346791	0.399423	No
PRR26	1.48677	1.17101	0.983673	1.10761	1.21747	0.67758	0.510331	0.811293	1.02984	0.753938	0.669994	0.5564	0.673678	0.790166	0.840432	0.002	0.634034	0.591746	No
RP11-161H23.5	6.86235	10.2299	11.1291	17.6223	5.06187	25.7823	18.9329	21.007	29.6949	23.7797	25.7509	15.6248	17.4527	21.0907	26.0008	0.002	2.34153	2.08072	No
RP11-218C14.8	2.14342	3.64644	3.24498	4.39359	2.41129	0.942497	1.88431	2.49992	1.98331	1.74629	0.427263	1.42178	1.35091	1.17366	1.15347	0.002	0.571748	0.348938	No
RP11-297D21.4	1.14019	1.45335	2.19428	1.70341	1.25456	0.376043	0.529916	0.519964	0.848283	0.721611	0.609871	0.669811	0.475298	1.21186	1.06311	0.002	0.386767	0.520276	No
RP11-400K9.4	1.61685	1.83771	2.66979	0.752422	2.10106	0.680596	0.50824	0.50502	0.692391	0.63798	0.657686	1.04896	0.625694	0.531933	0.877617	0.002	0.336855	0.416792	No
RP1-140A9.1	0.328399	0.654236	0.485297	0.902462	0.570842	0.46611	0.27309	0.0920343	0.108255	0.460633	0.0541595	0.0542559	0.171942	0	0.0889506	0.002	0.476032	0.125562	No
RP11-466A19.8	1.0014	0.865488	0.659035	0.711573	0.604012	0.452034	0.264742	0.223159	0.367403	0.794032	0.262564	0.263048	0.222302	0.384236	0.301939	0.002	0.547017	0.373314	No
RP11-563J2.2	0.627995	0.538541	0.368834	0.745282	0.442908	1.73757	2.24934	1.72193	1.9122	0.734336	0.369088	0.625765	0.431823	1.09806	0.504975	0.002	3.06781	1.11241	No
RP11-56G10.2	2.92423	4.02983	5.11941	6.13843	3.60058	1.21726	1.34689	2.35225	3.10085	1.47578	1.30697	1.8181	1.09614	2.37809	1.8712	0.002	0.435211	0.388333	No
RP11-769O8.3	2.20554	2.08534	1.50654	2.80056	1.3792	0.737509	0.879365	1.31268	1.00787	1.12757	0.715476	1.14274	0.982752	1.05708	1.18024	0.002	0.507658	0.50899	No
RP11-798M19.6	0.267638	0.660243	0.982686	0.543555	0.750338	0.0705748	0	0	0.000153055	0.0976373	0.425668	0.196833	0.402337	0.535864	0.16455	0.002	0.0525409	0.538391	No
RP11-973H7.3	1.03054	1.06316	1.00257	1.23595	1.00151	0.500591	1.21257	0.888536	0.748595	0.495825	0.599903	0.525418	0.55495	0.312384	0.491019	0.002	0.721093	0.465654	No
RP5-884C9.2	2.84251	1.92946	1.76772	11.7699	2.17062	0.0499421	0.185594	0.616571	0.756843	1.52386	0.342068	0.338217	0.419119	0.266339	0.874347	0.002	0.152968	0.109378	No
RP5-956O18.3	0.437477	0.806205	0.945006	0.909406	0.658802	1.27024	1.56749	1.47963	1.82995	1.03794	1.69295	1.32971	1.45318	1.81946	1.05347	0.002	1.91255	1.95607	No
RP6-109B7.5	7.42007	4.489	5.05849	8.19902	5.57951	2.65933	3.19144	3.39357	3.57907	5.60959	2.03527	2.65546	3.13299	1.12633	2.65691	0.002	0.599523	0.37751	No
RTCA-AS1	0.096101	1.91333	1.19063	1.54825	1.86511	0.467107	0	0	0.0317342	5.92965e-14	3.12966e-21	0	0	0	0	0.002	0.0754286	4.73229e-22	No
SNHG20	3.19263	2.99274	1.98797	2.80492	2.54646	2.58753	3.39936	3.09685	3.01514	3.73145	1.51312	1.7591	1.34731	1.98373	2.2656	0.002	1.17047	0.655752	No
SVIL-AS1	9.17772	11.7924	8.91706	7.92926	8.83809	8.44945	9.37845	8.85506	10.6249	11.3319	11.608	9.67071	7.41509	7.36149	9.84085	0.002	1.04255	0.983745	No
TINCR	17.8068	14.453	20.0455	40.6124	19.4649	1.59547	1.68315	1.97823	2.04932	5.68817	3.93748	6.0799	5.81512	3.0565	6.85899	0.002	0.115626	0.22911	No
AC004951.6	2.26573	2.84076	2.01054	3.77181	1.50287	1.49591	1.25271	1.40769	1.82697	1.38904	0.645398	1.13846	0.778348	1.14557	0.900044	0.001	0.59494	0.371847	No
AC005519.4	1.30844	0.942178	0.943674	1.35852	0.414819	0.498325	0.196656	0.420626	0.790681	0.572318	0.255021	0.213179	0.272554	0.12575	0.22913	0.001	0.498951	0.220555	No
AC016747.3	0.831538	1.22802	0.916901	0.477515	0.674111	0.897564	1.07913	0.761775	0.774049	0.82179	1.84027	2.00238	1.41503	1.7072	1.35725	0.001	1.04996	2.01598	No
AC017002.2	0.535609	1.04957	1.15885	0	0.969898	2.85054	1.8727	3.67929	3.99163	2.55186	1.23772	2.98683	1.42874	1.35175	1.75502	0.001	4.02432	2.35871	No
AC034220.3	2.37006	2.55016	2.05445	0.903626	1.99764	0.557271	0.590296	1.36022	0.510354	0.758791	0.2921	0.950308	0.830536	0.608609	0.657682	0.001	0.382438	0.338118	No
C1orf132	3.41912	2.04504	2.0804	3.89712	3.00492	1.44196	3.08717	1.55004	1.6846	1.64039	0.664477	0.830326	0.866778	0.955689	1.14632	0.001	0.65096	0.308972	No
CRYM-AS1	3.46139	3.51558	3.30926	5.86266	1.96502	3.21525	1.47421	2.61139	2.44719	1.98646	0.5021	1.1169	0.576582	0.963592	0.975196	0.001	0.647817	0.228243	No
CTB-181H17.1	0.701182	0.626024	0.509577	0.920803	0.566858	1.10601	1.01628	1.56709	1.52977	1.22278	0.799347	0.448031	0.747451	0.790154	0.834212	0.001	1.93775	1.08866	No
CTB-79E8.2	0.83774	0.934081	0.547334	0.874197	0.587036	0	0.126321	0	0	0	0.124354	0.496923	0.262336	0.642358	0.706987	0.001	0.0334148	0.590669	No
CTD-2619J13.9	0.417217	0.825241	0.610948	0.865047	0.765308	0.215843	0.196738	0	0.138108	0.186807	0.28753	0.487725	0.0837062	0.141337	0.419394	0.001	0.211695	0.407517	No
FAM157C	0.355275	0.564061	0.417387	0.51374	2.87492	7.7392	14.9192	10.2389	12.2988	4.60741	0.525718	5.60675	1.00396	2.5366	3.35407	0.001	10.5396	2.75683	No
HCP5	16.7464	11.968	18.7171	24.2244	13.0471	5.9543	10.4087	6.89731	7.18864	8.51338	4.04859	7.91875	3.24097	11.1304	8.84208	0.001	0.459988	0.415343	No
HOXB-AS2	0.56652	0.979779	0.693155	0.928195	0.399211	0.284701	0.541131	0.0505777	0.238139	0.281521	0.119175	0.417765	0.0630421	0.124428	0.146672	0.001	0.3914	0.244215	No
HOXC13-AS	2.19712	1.91709	2.63486	4.47711	2.57928	0.664932	0.417697	0.617078	0.708732	1.02789	0.88519	1.08475	2.51812	0.704638	1.13169	0.001	0.248911	0.458108	No
ITGA9-AS1	0.935892	1.27718	0.659062	0.493204	0.641895	3.4525e-111	7.00688e-58	0	0.244288	0.115752	0.471702	0.709114	0.388211	0.353331	0.548767	0.001	0.0898475	0.616666	No
LINC00894	1.16296	0.884212	0.969966	1.12743	1.02797	0.523159	0.22811	0.261288	0.510293	0.481676	0.446535	0.388928	0.265783	0.412965	0.287868	0.001	0.387532	0.348394	No
LINC00969	5.99801	6.51289	9.326	0.499328	8.10973	2.87216	3.84888	3.40764	0.739051	4.58654	1.15111	3.46103	4.28971	2.79346	5.72442	0.001	0.507597	0.572152	No
LINC01058	0.991596	0.905533	0.596346	0.336146	0.640847	0.322783	0.174916	0	0.340358	0	0	0	0	0	0.138155	0.001	0.241482	0.0398088	No
LINC01116	0.460599	1.0629	0.619659	0.914593	0.615969	0.564591	1.21558	0.502322	0.721419	0.527263	2.64779	1.77997	2.00577	2.14492	2.50242	0.001	0.961199	3.01625	No
MIATNB	2.25313	1.93561	3.23319	1.91555	2.65083	0.88348	1.40513	2.87459	1.38747	1.53174	0.772232	1.54581	1.7143	1.36671	1.90912	0.001	0.674191	0.609608	No
MIR205HG	2.34264	3.63821	2.72367	3.22688	2.39543	4.68061	10.2798	9.8545	12.7169	13.6389	2.65911	8.27699	8.47626	6.00969	4.73513	0.001	3.57167	2.10494	No
MIR497HG	2.19855	3.08497	2.68207	4.44925	2.26103	0.977973	0.935136	0.710683	1.05843	1.29742	0.760692	0.720862	0.621328	0.820561	0.807763	0.001	0.339308	0.254241	No
MSC-AS1	0.0316801	1.4668	0.22821	0	1.07267	0.200247	0.376918	0.921441	1.4268	0.677451	3.20417	1.39328	1.33721	2.8053	1.12528	0.001	1.28703	3.52411	No
NCK1-AS1	1.38283	1.67389	1.08099	1.33727	0.963079	0.611117	0.587646	0.230133	0.662953	0.25206	0.643824	6.44739e-10	1.78935e-06	1.64254e-06	0.953374	0.001	0.364071	0.248087	No
PRKAG2-AS1	1.29605	2.51099	1.96842	2.29432	1.55695	1.34234	1.50091	0.89531	1.57747	1.11835	0.587132	0.533694	0.55674	0.596313	0.579349	0.001	0.668387	0.296386	No
PSMB8-AS1	1.91929	0.552499	1.48274	0.29165	2.0309	4.80337	7.61655	5.01069	3.06701	2.92887	2.78204	3.75113	3.58914	4.60043	4.58517	0.001	3.73207	3.07594	No
PTOV1-AS1	0.810135	0.794903	0.895862	0.945644	0.853149	0.480426	0.467101	0.303904	0.363004	0.447115	0.334243	0.395384	0.524825	0.728812	0.418509	0.001	0.479464	0.558592	No
PTPRT	0.559559	0.96215	1.36267	1.05821	2.33946	0	0.0463377	0	0	0.260799	0.0459874	0.138252	0.243422	0	0.642825	0.001	0.0488912	0.170404	No
RP11-138I1.4	6.83281	5.8198	6.61784	4.13739	8.62132	12.7888	7.24358	7.93361	5.93546	8.3712	13.3992	11.4337	10.0296	13.5945	13.6881	0.001	1.31982	1.94027	No
RP11-15H20.6	2.80167	2.84988	1.6394	4.5574	3.532	0.214048	0.682216	0.618354	0.613884	2.19264	0.764214	0.809559	1.02182	1.01457	0.389635	0.001	0.280952	0.260059	No
RP11-175K6.1	0.220931	2.98179	2.46554	4.65506	1.27	0.107689	5.28812e-31	0.610009	0.0012513	0.757074	0.313805	0.754206	1.45022	1.81678	0.519514	0.001	0.127317	0.418735	No
RP11-186B7.7	0.941241	1.20501	1.15896	1.85736	0.356125	0	0.195603	0	0.379421	0.180167	0	0	0.201078	0.195433	0.614809	0.001	0.136842	0.183253	No
RP11-20I20.4	2.92395	1.64151	1.35659	1.50919	2.71323	1.05559	0.46341	0.371613	0.670533	1.27501	0.225686	0	0.473931	0.458819	1.26326	0.001	0.378152	0.238721	No
RP11-235E17.6	2.46069	2.18415	1.0186	3.54898	1.30722	0.434958	0.229501	0.0966039	0.511518	0.806201	0.511897	0.740644	0.421278	0.475286	1.02712	0.001	0.19761	0.301933	No
RP11-332H18.3	0.686418	0.922407	0.836595	1.48797	0.690733	0.179667	0.241821	0.167615	0.435723	0.176459	0.128916	0.355683	0.148312	0.381576	0.3062	0.001	0.259787	0.285608	No
RP11-334E6.12	2.03336	10.2405	7.8105	8.89332	3.48562	2.96581	10.1154	6.26475	3.38282	4.50085	14.1166	15.2212	13.6539	23.992	14.742	0.001	0.838782	2.51748	No
RP11-334J6.7	1.12168	1.08115	1.10697	0.791546	0.849006	0.394121	0.603028	0.689429	0.439993	0.595582	0.658979	0.719955	0.445709	0.908766	0.738164	0.001	0.549891	0.701278	No
RP11-356J5.12	0.571266	0.958627	1.65228e-35	0.107875	0.47304	0.212611	0.148349	0.48106	0.442263	0.554117	0.515954	0.0865005	0.775379	0.419326	0.363418	0.001	0.870946	1.02358	No
RP11-386B13.4	1.47475	0.405397	0.137351	1.39642	0.636159	0.292327	3.57955e-10	0.118553	0.454314	0.215286	0.332149	0.256543	0.396031	0.000109813	0.233825	0.001	0.26678	0.300897	No
RP11-408H20.3	1.41423	1.24424	1.17686	0.472814	1.12783	0.38933	0.227628	0.192283	0.0903604	0.384381	0.180741	0.316972	0.621881	0.189153	0.334426	0.001	0.236201	0.302278	No
RP11-507K2.3	0.58201	0.6569	0.939541	1.08577	0.502801	0	0.152206	0.254907	0.225507	0.213377	0.0752993	0.226111	0.636853	0.235249	0.123258	0.001	0.22458	0.344243	No
RP11-585P4.6	0.90651	0.641571	0.870159	0.339474	0.52728	0.0617965	0.129676	0.141241	0.169087	0.368122	0.0559175	0.322495	0.106905	0.270329	0.091771	0.001	0.264817	0.257966	No
RP11-635N19.1	0.740775	1.59071	1.77158	2.66808	1.45313	0.252454	0.333729	0.280203	0.5942	0.312263	0.264416	0.860475	0.559321	0.689438	0.65018	0.001	0.215563	0.367671	No
RP11-747H7.3	0.970224	0.555372	0.417068	0.231218	0.638758	1.34789	1.17207	1.22419	1.34385	0.941323	0.502923	0.72733	0.739911	1.06528	0.608638	0.001	2.14365	1.29561	No
RP11-800A3.4	1.16755	0.763524	0.950673	1.27784	0.940712	3.17815	2.09269	2.02114	3.17207	4.30117	1.70835	1.2273	1.87053	1.34945	2.28709	0.001	2.89497	1.65534	No
RP11-983P16.4	2.46864	3.99613	3.91285	4.90728	2.94754	0.477841	0.665611	0.992973	0.871258	1.34726	0.234731	0.324961	0.658773	0.392181	0.451232	0.001	0.238857	0.113088	No
RP3-449M8.6	1.31024	1.88932	1.91147	1.6708	1.0729	0.879519	0.208476	1.12571	0.615086	0.19417	0.411375	0.719804	0.542939	0.639726	0.921907	0.001	0.384859	0.411949	No
RP4-613B23.1	0.937837	5.06382	5.51513	4.44357	3.03683	0.608991	0.49388	0.806807	0.81328	1.21763	0.807183	0.644152	0.339986	0.331574	1.0429	0.001	0.20743	0.166645	No
RP4-622L5.7	2.74851	2.71722	1.34978	2.74239	2.21085	0.680834	1.17641	0.981079	0.981031	0.506551	0.715254	1.34162	0.755674	1.3934	0.876161	0.001	0.367576	0.431831	No
RP5-1056H1.2	1.3145	0.522449	1.04366	0.748005	0.82551	0.308111	0.343956	0.182854	0.364036	0.546136	0.299444	0.300365	0.521391	0.179777	0.353115	0.001	0.391793	0.371362	No
RP5-940J5.9	10.7199	13.1131	21.7959	14.5803	12.1769	53.9254	28.7857	50.9349	38.1694	24.1079	42.9727	41.6413	62.2268	73.8184	39.2281	0.001	2.70664	3.59029	No
SNHG17	3.64497	0.556498	4.54156	6.60251	1.93311	12.9943	11.5785	7.71781	8.13239	9.37986	8.04732	5.72182	2.8344	5.81139	5.89247	0.001	2.88234	1.63829	No
ZBED5-AS1	5.89758	2.87335	3.43576	1.7294	4.79901	2.20532	1.88222	1.40578	1.43392	1.88937	3.47623	4.09357	3.77254	2.7293	3.71733	0.001	0.470593	0.9495	No
AATBC	2.22015	0.775372	1.47247	2.86464	1.50729	0.375804	0.398093	0.211144	0.0943634	0.295979	0.512543	0.484399	0.399499	0.55045	0.494225	0	0.155588	0.276147	No
AC003986.7	0.955348	1.21345	0.921208	0.981568	0.834443	0.151724	0.321924	0.471164	0.07944	0.225531	0.39798	0.0796576	0.420661	0.33133	0.325509	0	0.254745	0.316986	No
AC004893.11	1.99037	1.82769	2.34859	3.5562	1.03996	0.592763	0.754931	0.953037	1.11461	0.269635	5.86878e-62	0.305586	3.90862e-15	0.591527	0.741253	0	0.34238	0.152225	No
AC005154.6	4.85166	2.76656	4.33266	2.82599	4.48207	3.45438	1.66777	4.98041	4.03632	3.02662	3.22924	3.10179	3.54535	3.66689	4.6981	0	0.8913	0.947164	No
AC006262.4	2.58425	0.743783	0.62098	2.33729	2.35332	0	0	0	0	0	0.373794	0.739905	0	0	0.292628	0	0	0.162776	No
AC006942.4	1.07521	2.05571	1.12455	1.53815	1.80945	0.484416	0.519726	0.214321	0.509123	0.120635	0.255722	0	0	0	0.415159	0	0.243089	0.0882382	No
AC007246.3	0.0699742	0.103017	3.61857	1.71312	1.27215	3.0035	0.889058	2.50792	0.735773	3.87753e-24	1.48439	0.59986	1.86511	1.53833	2.42294	0	1.05304	1.16731	No
AC007292.6	0.918261	1.16561	0.507918	1.2487	0.40765	0.203695	0.215673	0.241088	0.355276	0.134448	0.142325	0.356206	0.225743	0	0.0582813	0	0.270749	0.184211	No
AC008074.3	2.11277	1.30063	1.26224	2.76442	0.63992	0.284306	0.15063	0.441567	0.2232	0.281585	0.149051	0.298393	0	0.232861	0.244014	0	0.170952	0.114396	No
AC008440.10	0.577482	3.06385	3.61645	5.63103	2.6924	0	0	0.0956382	0.113386	0.322254	0.113817	0	0	0	0	0	0.0340974	0.00730476	No
AC009948.5	2.1989	1.017	1.54918	0.0483997	1.79354	1.90533	2.13283	1.85919	1.1699	2.01727	4.37465	3.51278	2.77253	2.426	3.66725	0	1.37498	2.53567	No
AC010226.4	0.993881	4.75858	2.5671	5.02297	0.952313	1.05074	1.84602	1.18238	0.882318	0.835796	1.07503	0.757511	0.817813	0.784721	0.630655	0	0.405549	0.284419	No
AC012531.25	1.85011	2.27212	2.19219	2.37693	2.37876	0.780101	0.99849	0.516321	0.822501	0.750765	0.796795	0.870542	1.22411	0.993183	0.985199	0	0.349425	0.439908	No
AC025335.1	19.1145	13.1229	20.085	25.363	14.7705	5.37625	8.62732	7.58619	4.59542	9.79328	8.16269	5.55168	7.6691	5.19755	7.19407	0	0.389142	0.36531	No
AC058791.1	1.97869	1.30643	1.31922	0.590028	1.69324	4.19252	6.1177	5.51921	5.31924	2.92278	2.35877	4.17454	2.09743	2.3735	2.55214	0	3.49489	1.96823	No
AC093609.1	3.7847	4.70376	6.25739	9.183	2.7218	0.185724	0.645105	0.346635	0.833712	1.50811	0.533335	0.892831	0.706434	0.635871	0.778565	0	0.132053	0.133094	No
AC098617.1	0.460939	1.02886	0.844849	0.686134	0.518075	0.260256	0	0.200143	0.136865	0	0	0.137351	0	0	0	0	0.168773	0.0388122	No
AC100830.3	0.902821	0.673581	0.381506	0.753979	0.738534	0.278933	0.239126	0.0451335	0.158674	0.199874	0.0264219	0.450464	0.0839907	0.19416	0.239722	0	0.267139	0.288301	No
AC142472.6	2.47322	2.32619	2.08947	3.59648	2.67306	1.11072	1.09048	1.21516	1.23056	0.843361	0.626703	0.991196	0.919568	0.556896	1.01431	0	0.417245	0.312247	No
AC144525.1	0.28244	0.698676	0.652539	0.426927	0.634632	0.185874	0.205478	0.211289	0.166858	0.174081	0.259788	0.227311	0.211944	0.0970279	0.273573	0	0.350095	0.396868	No
AF001548.6	1.75879	1.74207	1.32615	1.39971	1.64057	0.329082	0.234709	0	0.345546	0.218252	0.115631	0.115557	0.244035	0.239259	0.0940422	0	0.143326	0.10277	No
ANKRD18A	1.55392	0.999872	1.11289	1.36555	0.6379	0.548719	0.242291	0.642401	0.271149	0.483925	0.18064	0.0301889	0.191375	0.221103	0.645258	0	0.385967	0.223728	No
ANO1-AS1	0.680658	0.288371	0.550488	0.362245	0.589526	0	0.0896011	0	0	0.0836024	0	0.0885712	0.187081	0.0919996	0	0	0.0700863	0.148769	No
AP001062.7	1.25931	1.62045	1.30152	2.34941	1.3464	0.686284	0.654245	0.739685	1.07655	0.749872	0.678212	0.724834	0.504395	0.76041	0.735805	0	0.495949	0.432096	No
AP006621.5	1.37154	3.00299	4.59289	13.8993	3.89929	0.578288	0	0	0.627093	1.81771	0	1.26938	3.34408	0	2.19361	0	0.112945	0.254318	No
ATP1A1-AS1	1.49599	1.14073	1.3713	0.908544	1.22687	0.558897	0.204746	0.171834	0.269973	0.319235	0.270328	0.270666	0.285894	0.12026	0.276902	0	0.248181	0.199245	No
C14orf132	9.14517	13.53	16.553	17.2455	11.0374	1.63469	1.8104	1.85271	2.25604	3.49823	5.75947	4.26932	5.6241	4.81061	4.48802	0	0.163708	0.369592	No
C1orf229	0.835969	0.977131	0.778797	1.40947	0.450387	0.155126	0.234317	0.0920804	0.359282	0.203602	0.233218	0.215969	0.209184	0.113155	0.192618	0	0.234606	0.216576	No
C1QTNF9B-AS1	1.95339	0.612057	2.14007	0.619953	1.73668	0.783168	0.288735	0.993832	0.318541	1.53662	0.417139	0.825062	1.28176	0.143466	1.71484	0	0.555199	0.620529	No
C1RL-AS1	2.4732	2.40698	2.01401	4.65885	2.54694	2.23628	0.851542	1.29904	1.59755	2.67476	2.03431	0.402267	4.24179	0	1.26846	0	0.614127	0.563606	No
CADM3-AS1	0.752702	1.158	0.55849	0.695433	1.08777	0.224993	0.461848	0.198531	0.302331	0.378224	0.103914	0.38654	0.0422962	0.20182	0.23071	0	0.368246	0.226997	No
CARD8-AS1	0.698482	0.743813	0.548582	0.465952	0.626169	2.23147	3.17662	2.41602	2.07475	1.22732	1.92575	2.18368	1.86359	2.22139	1.86624	0	3.60888	3.26327	No
CBR3-AS1	2.97648	2.66593	1.53131	3.04531	1.72787	0.404709	1.44947	0.108819	0.261273	0.922184	0.158706	0.830203	0.962625	0.513884	0.685898	0	0.26337	0.263777	No
CEBPA-AS1	2.12898	1.66435	2.6583	4.23872	1.57083	0.90587	0.613031	0.300476	0.851599	0.944221	0.647098	0.278213	0.509545	0.50529	0.626015	0	0.294849	0.209292	No
CKMT2-AS1	1.62484	3.42337	1.61116	2.94271	2.84062	1.3496e-155	0.132361	0.315124	0.921006	0.942314	0.354603	1.23547	1.3413	1.40471	0.435745	0	0.185716	0.383504	No
CTB-102L5.7	1.19358	0.438235	0.693533	0.766779	0.825219	0.315914	0.462934	0.449949	0.461099	0.53926	0.175457	0.395984	0.16271	0.115204	0.398257	0	0.569048	0.318484	No
CTC-296K1.4	1.40523	1.22924	0.732226	0.524946	0.588486	0	0.314517	0.348311	0.103096	0.195275	0.10343	0	0.218408	0	0.25284	0	0.214547	0.128273	No
CTC-435M10.12	2.25655	3.06512	3.26513	3.17964	1.75433	1.12454	0.870398	0.992719	1.69386	0.803795	0.51163	0.680242	1.61557	1.39906	1.51275	0	0.405695	0.422998	No
CTC-558O2.2	2.0734	4.98385	7.23462	6.88063	4.41381	0.603857	1.08491	1.50156	0.947321	0.89602	1.45413	1.70945	0.802526	0.857614	1.76269	0	0.196733	0.257419	No
CTC-559E9.1	1.36301	1.75421	1.8345	2.44215	1.99385	0.102731	0.293077	0.305496	0.453349	0.204356	0.108246	0.778772	0.508623	0.61094	0.758367	0	0.144765	0.294528	No
CTD-2017C7.2	1.27491	1.26775	1.49087	1.17651	1.28169	0	0	0	0	0.161515	0	0.341716	0	0.175686	0.138155	0	0.0248801	0.100983	No
CTD-2260A17.2	1.25407	1.10383	1.43699	1.89773	1.08092	0.815334	0.580519	0.355252	0.343525	0.512298	0.595845	0.507188	0.65075	0.721273	0.641233	0	0.384869	0.460068	No
CTD-2515H24.2	0.704529	0.864153	0.945273	0.953137	0.939075	0.0467444	0.09791	0.0832097	0.097485	0.276275	0.07304	0.122094	0.0516009	0.076702	0.140615	0	0.136541	0.105319	No
CTD-2540B15.7	18.2319	18.3966	17.0559	38.0994	13.4556	4.04496	5.86322	3.5753	4.25761	5.56942	6.64373	6.18892	9.17816	5.01449	6.45168	0	0.2215	0.318103	No
CTD-2542L18.1	1.3213	1.54409	0.918766	1.72894	1.08959	0.42259	0.565671	0.45362	0.598233	0.394365	0.214094	0.361833	0.370395	0.462485	0.577615	0	0.36871	0.300851	No
CTD-2619J13.13	13.6895	6.96881	10.0666	20.3497	8.6242	4.09045	3.79265	1.33908	4.2343	3.561	4.39647	2.81335	3.61514	5.89469	2.58087	0	0.285056	0.323298	No
CTD-2619J13.3	0.790745	0.859996	1.05351	1.01724	0.939255	0.187645	0.132278	0.499866	0.457997	0.185668	0.131014	0.196782	0	0.273311	0.375882	0	0.313996	0.209621	No
CTD-3064M3.3	0.46111	1.00295	0.417604	1.3136	0.871562	0.141211	0.168884	0.0538751	0.210298	0.198643	0.0840194	0.168558	0.0667877	0.176561	0.398815	0	0.190053	0.22001	No
CTD-3157E16.2	1.50767	2.52436	1.99271	0	2.20943	2.81914	3.71858	5.61092	5.34584	4.00192	5.43639	4.24041	6.67564	4.90839	4.25004	0	2.61063	3.09817	No
CYB561D2	1.66246	0.28308	1.70404	2.03136	1.71272	0	2.21392e-44	5.01535e-82	0.0438753	5.79015e-96	3.01305e-42	8.6778e-50	0.47809	0.875911	0.671299	0	0.00593418	0.273924	No
DICER1-AS1	0.944332	0.888761	0.893839	0.405292	1.16358	0.823657	0.767392	0.377674	0.501754	0.675369	0.237674	0.668949	0.548057	0.698254	0.607598	0	0.732307	0.642611	No
DOCK1	6.97944	4.42752	3.85777	7.40115	3.41264	2.66426	1.8411	2.38536	3.28358	3.08689	1.49027	1.62981	2.33834	2.46086	1.83484	0	0.50851	0.374029	No
EBF3	1.16144	1.7973	1.43126	2.72077	1.42266	0.106334	0.0372308	0.567446	0.0369958	0.209779	0.554754	0.333671	0.195845	0.232543	0.548158	0	0.112239	0.218549	No
EIF2B5-IT1	0.376566	0.840854	0.517363	0.630572	0.138058	0	0.015445	0	0	0	0.0307532	0.0227065	0.0163016	0	0.0508199	0	0.00616958	0.0481667	No
EIF3J-AS1	2.02868	2.42258	1.63996	2.78489	1.58144	0.900262	1.0615	0.854287	1.1152	1.23848	0.939743	1.02522	0.635061	0.856987	0.800787	0	0.494354	0.407151	No
EN113	9.90791	7.25484	6.91676	5.15564	4.96094	1.66802	2.20585	1.99269	1.69335	1.40505	2.14867	3.1181	3.27035	2.06487	2.28257	0	0.262163	0.376785	No
EPB41L4A-AS2	0.0888836	0.22149	0.360769	2.10396e-06	0.289637	0.509933	0.59907	0.42156	0.204363	0.189496	0.500529	0.678192	0.861414	0.526431	0.0821641	0	2.00298	2.75685	No
FAM19A5	1.75861	2.24572	2.03908	4.30326	1.23244	0.826538	1.05651	1.38365	0.877212	1.22239	0.770379	0.838847	0.607619	1.02172	0.517151	0	0.463447	0.324353	No
FLG-AS1	33.9819	19.4533	24.9095	26.9671	16.6852	2.03493	4.35681	3.65692	1.47484	7.17516	8.46668	5.51314	6.43125	6.34875	6.63683	0	0.153271	0.27375	No
FLJ27354	1.64035	1.22371	1.90299	4.18506e-78	1.33651	0.772904	0.182827	0.212853	0	1.11115	6.89398e-85	0.535166	0.18829	0.366523	0.432357	0	0.373509	0.249418	No
FP565210.1	1.85919	2.76259	2.47549	2.23332	1.35341	0.822643	0.682829	1.09596	0.55302	0.87174	0.123015	1.04719	0.715745	0.513586	0.60541	0	0.376843	0.281257	No
GAS6-AS1	0.978955	1.51444	1.18826	1.66245	1.01855	0.202108	0.217186	0.411957	0.503438	0.450367	0.128518	0.204475	0.287489	0.406207	0.348403	0	0.280552	0.216119	No
GS1-124K5.3	1.58442	1.62526	2.13494	2.88251	1.65334	0.610102	0.665578	0.444866	1.05579	0.673733	0.5074	1.20503	0.960935	1.13642	0.71214	0	0.349181	0.457663	No
GS1-358P8.4	10.6775	7.71394	12.0261	7.91694	12.3798	3.16017	7.10308	3.10551	3.56077	6.06178	5.33099	5.66683	5.31106	6.0187	5.39016	0	0.45335	0.546547	No
HAND2-AS1	0.546764	0.922164	1.17833	0.536224	0.939965	0.128248	0.234407	0.0652467	0.0719071	0.108222	0.37705	0.363514	0.540308	0.244607	0.377974	0	0.147457	0.461617	No
HDAC4	2.75659	1.86838	2.28198	2.76203	1.90256	2.00499	1.49973	2.00192	1.89105	1.79293	0.621291	1.12079	0.809024	1.60656	1.19056	0	0.794243	0.462188	No
HMGN3-AS1	0.919649	0.789756	1.15136	1.12541	0.944389	0.656243	0.712402	0.572996	0.616685	0.645665	0.455082	0.456627	0.610224	0.591413	0.69695	0	0.649822	0.569975	No
HOXC-AS1	2.32335	3.00485	2.66883	4.92857	2.7514	0.144616	0.354351	0.0977401	0.32259	0.549122	0.814615	0.46518	0.122796	0.361148	0.378539	0	0.0936671	0.136651	No
KRTDAP	0.581035	0.623167	0.277294	0.860042	0.938877	0.197217	0	0.131445	0.103038	0.243556	0.0515426	0.0516396	0.218205	0.215541	0	0	0.205845	0.163677	No
LAMTOR5-AS1	3.14099	3.0597	1.84395	3.05261	1.73677	0.228132	0.261924	0.337077	0.772827	0.536684	0.341796	0.590862	0.177622	0.329145	0.0941072	0	0.166483	0.11949	No
LIFR-AS1	0.932812	1.34862	1.01999	1.60454	0.732143	0.234715	0.520629	0.348464	0.387094	0.336658	0.183036	0.316338	0.280357	0.203366	0.344763	0	0.324144	0.235515	No
LINC00152	3.92392	10.8352	12.5214	7.34463	10.0449	18.0877	36.3097	32.4652	58.7111	14.1633	50.6674	31.8952	56.2156	67.9132	44.6755	0	3.57593	5.62719	No
LINC00174	1.9932	1.3496	1.32549	2.26248	1.33329	0.335963	0.513551	0.459394	0.398706	0.606936	0.412081	0.806931	0.430651	0.487442	0.725567	0	0.280074	0.3464	No
LINC00472	2.62133	2.73472	2.27403	4.97296	2.86817	1.28714	1.60223	1.3256	1.91066	1.44857	0.879499	1.63185	1.28386	0.987327	1.0752	0	0.489567	0.378622	No
LINC00672	1.21385	0.852517	0.801473	0.778226	0.740475	0.392922	0.564852	0.160356	0.204743	0.354514	0.306685	0.581175	0.34317	0.591157	0.703701	0	0.382394	0.575827	No
LINC00863	2.79731	2.26373	3.41322	5.22879	3.63168	1.32555	0.715806	1.09923	1.5238	1.77821	1.18428	0.786895	1.42185	1.67446	2.15078	0	0.371658	0.416405	No
LINC00896	1.09514	1.01328	1.09207	1.71445	0.82946	0.313102	0.404575	0.754289	0.65271	0.54397	0.306763	0.326966	0.528383	0.564231	0.759933	0	0.464565	0.432817	No
LINC00910	0.90314	0.718291	1.01446	1.39917	0.955765	0.275938	0.340529	0.124578	0.228085	0.279241	0.259246	0.411642	0.33396	0.256126	0.302165	0	0.250133	0.313202	No
LINC01089	1.77419	2.25	1.77281	0.971135	1.9714	0.507267	1.44259	1.3312	2.00086	1.61907	0.794268	1.39219	1.22996	1.90693	0.597395	0	0.789629	0.677467	No
LINC01125	0.75271	0.315818	0.433682	0.161078	1.06826	0.174225	0.306523	0.509703	0.287785	0.343621	0.466611	0.336125	0.192831	0.576204	0.166483	0	0.59375	0.636362	No
LINC01144	0.798416	1.31019	1.08879	1.74444	0.925487	0.567004	0.593855	0.441572	0.541981	0.605092	0.221499	0.394937	0.339044	0.620251	0.487323	0	0.468613	0.351618	No
LINC01237	0.784279	0.341191	0.886373	0.622801	0.736435	0.208183	0.0572651	1.35139e-49	1.06156e-20	0.261773	0.582344	0.520433	0.224365	1.09045	0.0740566	0	0.156395	0.739125	No
LINC01315	2.82985	3.43438	3.01117	9.12567	3.38166	0.190996	0.478415	0.420907	0.249403	1.3566	1.04726	1.17674	0.823754	0.939857	1.18467	0	0.123783	0.237449	No
LINC01515	1.10211	0.348697	0.476157	0	0.612406	0.508198	0.608112	0.0906267	0.107358	0.406752	0.107732	0.430782	0.454891	5.01454e-07	0.120262	0	0.677746	0.438561	No
LORF2	4.49459	1.90526	1.15759	0.0632303	1.60979	0.560729	0.227296	0.64191	0.786107	0.74375	0.109159	0.945603	0.579874	0.216028	0.858505	0	0.320655	0.293503	No
MAPT	0.679915	0.517485	0.647955	0.7427	0.458024	0.357188	0.344808	0.453421	0.344122	0.395182	0.111404	0.2236	0.265813	0.342068	0.353192	0	0.62202	0.42549	No
MATN1-AS1	0.611733	1.92327	1.4301	4.6034	0.960313	0.504134	1.94876e-10	0.153416	0.791196	0.752939	0.641532	0.197436	1.92081e-10	0.345029	0.607554	0	0.231055	0.188014	No
MIR143HG	9.18009	14.3894	8.06919	7.60423	9.02698	3.33301	4.57154	2.23825	4.68138	3.09581	1.8596	3.42621	2.40061	4.86091	2.38084	0	0.371246	0.309265	No
NEK4	1.84825	1.11485	1.86792	3.8244	1.34458	0.140017	0.268082	0.263637	0.34326	0.791113	0.0933481	0.468312	4.22528e-80	0.356192	0.300452	0	0.180611	0.12183	No
NUTM2A-AS1	4.61709	1.03789	3.0582	1.80629	4.09849	3.98363	1.12142	4.26495	3.20652	5.11551	3.20873	1.06295	3.04419	2.06568	3.10327	0	1.21029	0.854074	No
PCBP1-AS1	1.51161	1.05314	1.13249	0.477333	1.70311	3.06194	3.49912	3.63099	2.9032	3.10367	3.63097	3.74993	2.63018	3.00205	2.81593	0	2.756	2.69308	No
PGM5P2	1.00464	0.739153	1.01509	0.396896	0.501804	0.179791	0	0.0355679	0.145775	0.118024	0.1248	0.125187	0.110229	0.15299	0.103028	0	0.131004	0.168481	No
PPP1CA	2.74423	2.38595	3.02067	6.53258	2.61814	0.667112	0.67641	0.816546	0.825889	1.06755	0.325634	0.696814	0.621217	0.433338	0.806356	0	0.234286	0.166653	No
PPP3CA	0.534656	0.527775	1.04705	0.926871	0.527231	0.0658503	0.278749	0.233844	0.0689003	0.195543	0.344982	0.276315	0.583716	0.503485	0.565266	0	0.236528	0.638056	No
PREX1	0.785409	0.345944	0.634373	0.493554	0.640257	3.97925	6.82517	3.87256	3.48785	1.92602	0.666078	1.0604	0.663872	1.31345	0.999795	0	6.92899	1.62219	No
PRKACA	4.9123	4.27675	1.55284	3.77933e-65	4.57883	13.863	12.8125	9.86865	6.11995	9.9768	13.4375	10.9352	12.7651	9.62711	8.33816	0	3.43593	3.59664	No
PRR34-AS1	2.79236	3.10587	2.53474	3.82726	2.69803	2.31016	1.23686	1.29811	1.24454	1.39088	0.96239	0.536795	0.958424	1.0053	0.954246	0	0.500095	0.295299	No
RNU12	0.725542	1.38286	0.150804	0.695338	0.322946	4.36182	5.31939	3.94056	3.46932	2.64297	2.37461	2.96995	1.70276	2.73361	1.59407	0	6.02109	3.47064	No
RP11-1000B6.3	6.20517	7.08272	10.0691	17.2245	7.83221	1.10083	0.786267	1.70176	0.536104	3.61846	1.83901	1.6204	4.17094	4.4539	3.57364	0	0.159943	0.323419	No
RP11-1024P17.1	1.38378	0.863001	0.624326	0.0457604	1.0625	2.65419	4.10177	2.5104	2.74544	2.38912	1.4683	1.66773	1.85368	1.5653	1.53281	0	3.6189	2.03244	No
RP11-1055B8.4	1.53216	1.38308	1.36621	1.81052	1.63187	1.1534e-34	0.486157	2.39315e-24	0.0765797	0.231227	0.0816509	3.6507e-19	0.497969	6.54594e-16	0.326118	0	0.102794	0.117265	No
RP11-107N15.1	1.23384	1.4913	1.94906	3.8787	1.62927	0.390682	0	0.289049	0.817507	0.515573	0	0.478108	0.288575	0.142248	0.111791	0	0.19768	0.100246	No
RP11-111M22.2	1.16707	1.30336	1.56908	0.86934	1.13197	0.449516	0.413436	0.225893	0.446649	0.39223	0.602631	0.604885	0.499056	0.810884	0.805738	0	0.319116	0.550123	No
RP11-129M16.4	0.554821	0.976646	0.795235	0.0872861	0.849391	1.45377	2.32704	1.76412	2.12279	1.56277	1.15692	1.07732	1.07989	1.0119	1.06764	0	2.82851	1.65279	No
RP11-134G8.5	1.01787	1.06016	0.785069	1.1044	1.21978	0.432972	0.311105	0.339831	0.364385	0.484344	0.35405	0.42977	0.479336	0.481542	0.455915	0	0.372572	0.424233	No
RP11-1391J7.1	0.803249	1.14816	0.754644	1.56002	0.844135	0.133646	0.13982	0.390941	0.437834	0.112787	0.0397534	0.358903	0.189612	0.208886	0.196937	0	0.237765	0.194531	No
RP11-141O15.1	0.502209	0.273465	0.596394	0.25787	0.55874	0	0	0	0	0	8.4756e-165	0	4.5456e-151	0	0.068517	0	0	0.0313052	No
RP11-157P1.4	1.18782	2.30779	1.379	1.75844	1.01014	0.466313	0.329955	0.344745	0.406983	0.770336	0	0.489731	0.431028	0.0848545	0.200075	0	0.30332	0.157747	No
RP11-158M2.3	0.605512	0.986653	0.625951	0.832423	0.669228	0.286132	0.552664	0.423835	0.44842	0.706594	0.348898	0.299639	0.158268	0.260613	0.286707	0	0.649945	0.364035	No
RP11-166D19.1	0.561035	0.664854	0.472497	9.61847e-18	2.14336	2.80182	3.86062	3.13153	3.5005	1.95985	2.28997	2.4827	3.19552	1.18312	0.917293	0	3.97067	2.62084	No
RP11-195F19.9	1.23064	1.37973	2.33213	1.38757	1.20827	0.80588	0.17119	0.500374	0.168842	0.559325	0.930705	0.592609	0.0894108	0.43989	0.484035	0	0.292586	0.3365	No
RP11-242D8.1	1.39134	1.25838	1.16221	1.4765	1.35151	0.618891	0.497233	0.615168	0.684023	0.969693	0.683835	0.456993	0.563274	0.597092	0.281499	0	0.509795	0.388963	No
RP11-244F12.3	0.674697	1.81974	0.874421	1.20085	0.652276	0.125953	0.317304	0.177732	0.093977	0.37023	0.353999	0.360017	0.0399055	0.353863	0.155593	0	0.207813	0.241934	No
RP11-259O2.1	1.43267	0.84934	1.03305	1.04602	0.949086	0.206306	0.28724	0.224585	0.18399	0.41717	0.226477	0.223569	0.163604	0.0897618	0.246624	0	0.248446	0.178909	No
RP11-262A16.1	1.19797	3.3467	2.14589	2.12156	1.82688	1.04619	0.529531	0.689114	1.09226	1.03236	0.566276	0.689218	0.385483	0.635458	0.63247	0	0.412582	0.273419	No
RP11-266K4.14	0.942243	1.566	1.69449	1.0892	1.28064	0.0782027	0.58327	0.388079	0.128017	0.186824	0.0929458	0.38473	0.443494	0.158943	0.201712	0	0.207589	0.195026	No
RP11-266L9.8	4.41648	4.58	7.19096	8.45415	4.37383	1.03948	2.10363	1.43127	2.184	2.06957	1.21847	1.82608	2.82786	2.2668	2.17802	0	0.30425	0.355577	No
RP11-307B6.3	0.942154	2.2537	0.863832	0.852125	0.956636	0	0.429705	0.117694	0	3.18145e-17	0.140763	0.140532	0.445093	0.145039	0.3421	0	0.0932783	0.206788	No
RP11-307C12.11	2.13894	1.28879	2.15984	2.63346	2.07342	1.00569	0.250008	0.788116	0.804245	1.11174	0.433493	0.992301	0.655108	0.581691	0.914257	0	0.384654	0.347454	No
RP11-307C19.2	1.82963	1.68232	1.0133	1.50541	0.931846	0.10848	0.114477	0.0964537	0	0.536625	0.113488	0.113682	0.0599853	0.177955	0	0	0.122949	0.0668021	No
RP11-313D6.3	0.536047	0.458405	0.757382	0.843687	0.611613	0	0	0	0.218152	0.414739	0	0	0	0	0	0	0.197338	0	No
RP11-327F22.6	2.50991	0.854784	1.01584	0.661075	1.35883	3.25913	2.87564	2.65197	3.12643	2.4873	1.56557	1.92351	1.35446	2.37306	2.27297	0	2.24992	1.48264	No
RP11-327P2.5	2.73572	2.04228	2.17681	2.17057	1.84893	1.34216	1.82687	1.29143	0.862973	0.914272	1.43935	1.42904	1.58024	0.978844	1.40353	0	0.568392	0.622454	No
RP11-337C18.8	1.62924	1.7164	1.22591	2.12444	1.69904	0.805625	1.01114	0.763772	0.624332	0.663875	1.34423	1.43959	0.890393	1.30641	1.42498	0	0.460837	0.763023	No
RP11-342I1.2	0.618021	0.783823	0.533196	0.618797	0.456241	0.284701	0.240503	0.151733	0.0595347	0.112608	0.0595875	0.119362	0.126084	0.0622138	0.0488908	0	0.282079	0.138248	No
RP11-347C18.3	0.987914	1.00364	0.820357	1.50049	1.02444	0.512125	0.46538	0.324614	0.153189	0.289911	0.230199	0.384006	0.0811171	0.136121	0.43952	0	0.327013	0.238149	No
RP11-368L12.1	15.7175	6.93298	4.47545	12.4314	8.02732	0.255841	0.567526	1.3681	1.1331	2.15096	0.397928	1.83848	1.3387	0.387183	0.867702	0	0.115069	0.101503	No
RP1-136B1.1	0.669591	0.510235	0.417101	0.32111	1.19061	0.148815	0	0.0660243	0.233723	0.0737235	0.0780542	0.0781195	0.165017	0	0.0638563	0	0.168011	0.123863	No
RP11-386G11.10	7.4784	13.3521	12.8659	25.6653	7.44192	16.7106	17.9024	14.8444	17.2146	12.3512	20.8592	19.0977	16.3127	30.7226	23.2596	0	1.18292	1.65039	No
RP11-395I14.2	3.14153	1.73472	2.18934	1.49862	2.11333	0.117836	0.505286	0.417155	1.11431	0.469341	0.248708	0.248462	0.787009	0.642358	0.908983	0	0.245743	0.265559	No
RP11-401P9.4	2.7838	5.0685	4.74713	2.67702	3.67698	0.685623	1.09084	0.717324	0.816242	0.95275	0.531914	0.976672	1.06803	0.500232	1.10413	0	0.224908	0.220592	No
RP11-420A23.1	1.96448	1.69393	1.99499	1.88295	2.62165	0.372411	0.390005	0.5938	0.402478	0.935427	0.284374	0.600177	0.60718	0.537307	0.687849	0	0.265222	0.267463	No
RP11-426C22.4	0.822526	0.977086	0.7148	1.17179	0.407383	0.311671	0.242921	0.447268	0.201986	0.180848	0.507765	0.53424	0.349478	0.691424	0.685487	0	0.338259	0.676276	No
RP11-429E11.2	0.448823	1.08091	0.324877	0.9176	0.595486	0.125584	0	0	0.0517392	0.097839	2.12311e-06	0.207441	0.109568	0.108228	0.127571	0	0.0817064	0.164151	No
RP11-429J17.2	1.01444	1.11957	1.21485	1.33587	0.689142	0.302595	0.401099	0.269376	0.420597	0.258236	0.0840194	0.337117	0.222626	0.441402	0.398815	0	0.307395	0.276147	No
RP11-435O5.5	0.897846	1.13627	0.813294	0.885649	0.748979	0.358107	0.281727	0.292058	0.186804	0.235344	0.0933419	0.40557	0.164807	0.359013	0.384658	0	0.302104	0.314007	No
RP11-444D3.1	5.50435	4.70325	4.53623	1.52157	3.27869	0.484793	1.14652	0.496887	0.953909	2.57802e-13	0.546304	0.439727	0.950719	0.715125	1.30049	0	0.1577	0.202228	No
RP11-462G2.1	2.02121	0.938007	1.35659	1.07799	0.834841	1.47783	3.53658	0.686652	1.11756	1.7995	8.84317	4.68507	7.6795	3.62526	4.78111	0	1.38363	4.75451	No
RP11-46C24.7	2.16895	1.95584	1.78445	1.37967	1.71454	1.05822	1.12273	1.11106	0.855888	0.777244	1.13407	1.30268	0.818911	0.81227	0.638158	0	0.547028	0.522698	No
RP11-482G13.1	0.970971	0.329472	0.930125	0.847226	0.530966	6.00704	5.41698	4.33343	2.03328	2.50973	0.939931	1.53551	0.768503	1.0278	1.29012	0	5.62533	1.54121	No
RP11-486O12.2	0.534256	0.61432	0.392886	0.636579	0.489086	0.338539	0.325762	0.379009	0.302763	0.24317	0.239002	0.375688	0.377869	0.294567	0.317255	0	0.595863	0.601539	No
RP11-490M8.1	0.000974809	2.03356	1.62003	0	1.65166	0.779128	0.288545	0.683681	0.276011	0.525759	0.411833	1.21586	0.916527	1.34149	0.221691	0	0.481156	0.774072	No
RP11-504P24.8	0.574914	1.07609	0.747065	1.58865	1.06099	0.31717	0.236643	0.490507	0.175268	0.445171	0.347511	0.283431	0.304493	0.477779	0.414756	0	0.329805	0.362139	No
RP11-517B11.7	1.53133	0.711589	0.842608	0.155222	1.05104	2.02579	2.08133	2.02516	3.13168	1.73828	1.07572	1.07946	1.03372	1.13211	1.13955	0	2.56356	1.27233	No
RP11-532F12.5	3.53506	3.47723	3.67438	4.58456	2.69275	1.88982	1.2386	1.05071	1.67758	2.43617	1.03557	1.15909	1.21537	2.42107	0.911554	0	0.461639	0.375343	No
RP11-535A19.1	2.63335	1.74711	3.10275	2.51386	2.58967	0.796208	0.491577	0.471228	0.763693	0.722482	0.556203	0.696069	0.294089	0.579774	0.683464	0	0.257826	0.223219	No
RP11-543P15.3	0.869956	0.503282	0.576258	0.605477	0.615211	0.177183	0.202073	0.344225	0.503586	0.396343	0.201149	0.252256	0.231005	0.229123	0.304633	0	0.512087	0.384257	No
RP11-551L14.4	0.630252	0.500795	0.655731	0.37718	0.351174	0.0878882	0.0935175	0	0.276368	0	0.0923669	0.092392	0.0975727	0.0959227	0.150791	0	0.182008	0.210345	No
RP11-552F3.10	0.697354	0.644911	0.497604	0.776113	0.383907	0.323565	0.277664	0.366398	0.276185	0.608903	0.153334	0.184499	0.162442	0.0965122	0.202216	0	0.617595	0.266344	No
RP11-554D20.2	3.32811	1.45396	2.1867	1.1714	1.94687	0.323282	0.237518	0.287582	0.168671	0.446285	0.505759	0.574677	0.464295	0.848476	0.805562	0	0.145071	0.317117	No
RP11-57H14.2	1.88353	2.23465	1.27268	1.59784	1.06333	0.611657	1.323	0.675256	0.966773	0.91729	0.162158	0.647013	0.68299	0.166509	0.261861	0	0.558117	0.238515	No
RP11-59C5.3	1.04274	0.989848	1.10245	1.38026	0.682891	0.329354	0.434674	0.34733	0.37797	0.535292	0.237519	0.364589	0.422312	0.478214	0.52018	0	0.389486	0.389138	No
RP11-600F24.7	1.33797	1.23615	1.00509	2.4564	0.971832	0.364646	0.409108	0.267985	0.256363	0.286892	0.199033	0.228273	0.412077	0.41905	0.376242	0	0.226187	0.233277	No
RP11-622C24.2	0.814492	0.867016	0.492183	0.55672	0.305743	8.28492e-59	0.140689	0.0111893	0.126359	0.0443388	0.026941	0.126991	0.143047	0.000260966	0.0641622	0	0.106245	0.119033	No
RP11-638I8.1	1.02037	0.92612	1.13623	0.785769	1.05442	0.405749	0.51722	0.215934	0	0.321863	0.255618	0.682024	0.630269	0.265768	0.487401	0	0.296728	0.471485	No
RP11-66B24.4	0.947359	0.643353	0.717528	0.283467	0.61725	0.602072	0.614331	0.590126	0.448038	0.486046	0.488572	0.489505	0.589574	0.860956	0.424063	0	0.854051	0.888971	No
RP11-66N24.4	2.29223	2.5267	2.91125	2.46525	2.38727	1.6784	1.61555	1.45728	1.83371	0.962749	1.06701	1.1484	0.929918	1.32807	1.53276	0	0.599847	0.477335	No
RP11-6O2.4	0.988168	1.12765	0.846756	2.02253	0.903947	0.40467	0.422942	0.320318	0.796513	0.722738	0.233922	0.406805	0.297589	0.229604	0.244811	0	0.452905	0.239891	No
RP11-712B9.2	0.750123	0.51406	0.725287	1.64939	1.02789	0.0631449	0.477758	3.50973e-09	4.26385e-05	0.379645	0.204669	0.141626	0.278175	0.172013	0.0993776	0	0.197266	0.191967	No
RP11-713P17.4	0.494909	0.492474	0.620361	0.681129	0.740984	0.0777544	0.245223	0.138282	0.121769	0.460367	0.0811682	0.20339	0.0859499	0.0425051	0.166994	0	0.344371	0.191431	No
RP11-739P1.2	0.877452	0.647051	0.432144	0.635851	0.588548	0.158041	0.100201	0.142247	0.166478	0.251567	0.166241	0.116749	0.0881157	0.0524395	0.192262	0	0.257316	0.193586	No
RP11-77K12.9	0.591419	0.556342	0.650573	0.481792	0.332159	0.27036	0.219776	0.294255	0.187818	0.369538	0.171912	0.313601	0.231957	0.180791	0.232425	0	0.51363	0.432834	No
RP11-848P1.9	1.01426	0.972245	0.416484	1.47747	0.642657	0.217938	0.135193	0.0574766	0.288998	0.277878	0.134113	0.202563	0.159668	0.157201	0.29835	0	0.216108	0.210451	No
RP11-863P13.6	1.31725	2.11841	4.2653	3.92108	1.2036	0.453614	0.818992	0.628633	0.559595	0.704778	0.35991	0.47578	0.630492	0.310588	0.600599	0	0.246819	0.185361	No
RP11-875O11.1	1.88234	3.93591	3.97044	5.37452	3.37944	0.713471	0.981334	0.725872	0.786291	1.38507	0.806592	1.06458	0.652409	1.00358	1.62953	0	0.247647	0.278099	No
RP11-96D1.11	3.38372	2.79959	2.45636	2.57427	3.76472	0.117218	0.985252	0.0803879	0.729664	1.56769	0.866433	0.586258	1.12999	1.08515	1.37437	0	0.232345	0.336626	No
RP13-1032I1.7	2.32744	3.10979	2.88231	5.16736	1.27293	0.148707	0.219807	0.285976	0.290877	0.528268	0.0916755	0.439891	0.324748	0.436692	0.371078	0	0.0998409	0.112744	No
RP1-317E23.3	0.985758	0.954144	0.918878	1.76704	0.828795	0.370244	0.457523	0.524467	0.456025	0.397571	0.490428	0.351437	0.686982	0.331455	0.578685	0	0.404397	0.447142	No
RP1-34H18.1	3.6563	4.59509	4.33486	2.93352	3.50274	0.123834	0.956618	0.599871	0.160534	1.54762	0.822062	1.77845	1.74663	2.18846	1.64819	0	0.17813	0.430216	No
RP13-616I3.1	1.28181	0.864729	0.813917	0.567106	0.422866	0.233879	0.171458	0.166531	0.170713	0.322538	0.194904	0.122176	0.103271	0.127922	0.140709	0	0.269621	0.174407	No
RP3-402G11.25	1.12283	0.802363	0.5103	0.756876	0.702431	0.468398	0.331459	0.277023	0.163525	0.154762	0.245801	0.0819895	0.346375	0.170465	0.0669891	0	0.358213	0.234061	No
RP3-402G11.28	1.15068	1.56016	1.03719	1.65321	0.68357	0.427605	0.363781	0.455012	0.179249	0.169685	0	0.0898831	0.189851	0.466736	0.586961	0	0.262183	0.219141	No
RP3-428L16.2	0.623366	0.968419	1.08132	2.88115	0.802343	0.584267	0.611316	0.624177	0.690257	0.364345	7.11714	2.05434	4.44876	5.36953	2.47762	0	0.452186	3.37718	No
RP4-639F20.1	0.45889	1.70129	1.40398	1.36373	1.2436	0.758673	0.341711	0.769762	0.317118	0.380689	1.35877	0.719721	0.887056	0.830895	1.05133	0	0.416099	0.785511	No
RP4-728D4.2	0.865814	0.775086	0.685392	1.04036	0.563897	0.337786	0.118876	0.050009	0.23544	0.445319	0.53019	0.531034	0.373964	0.430593	0.58008	0	0.302103	0.62227	No
RP4-737E23.2	4.01032	1.73427	6.80681	13.0794	5.02239	0.131174	0.502732	0.397351	3.73612e-06	0.000216217	0.82176	0.0871593	0.780528	0.710475	1.94004	0	0.0336499	0.141583	No
RP4-756G23.5	0.606212	0.623738	0.550907	0.409997	0.495264	0.230961	0.0965655	0.205665	0.0481359	0.106075	0.240329	0.257194	0.254778	0.144842	0.185315	0	0.255909	0.402982	No
RP4-773N10.4	4.82523	5.84225	5.55965	9.78996	4.38177	2.84898	2.70781	3.16268	3.50594	3.6121	1.93203	2.68888	2.65771	2.5521	2.83408	0	0.52099	0.416621	No
RP4-794I6.4	0.651375	0.615634	0.431343	0.966824	0.339466	0.132932	0.012507	0.250775	0.1728	0.0676508	0.292172	0.136796	0.236478	0.0889099	0.030196	0	0.211894	0.261113	No
RP4-802A10.1	15.2374	8.74008	9.08459	6.59952	8.73677	2.78352	1.89821	4.78917	4.16585	3.21995	1.70741	3.25237	1.63493	3.3508	2.88565	0	0.348291	0.265116	No
RP5-1039K5.19	0.765042	0.939607	0.873898	1.69286	0.702862	0.394132	0.412403	0.483002	0.629733	0.487837	0.145687	0.216272	0.205983	0.30948	0.205159	0	0.483912	0.217636	No
RP5-1107A17.4	0.737397	0.418545	0.355996	0.527058	0.512263	0.197293	0.240654	0.27815	0.222746	0.145644	0.171104	0.205991	0.253935	0.107938	0.197871	0	0.425079	0.367207	No
RP5-1139B12.3	1.82684	1.68617	1.42874	1.66533	1.68148	1.06061	0.673049	0.620877	1.019	0.797725	0.815687	0.661161	0.585794	1.00739	0.953607	0	0.503255	0.485445	No
RP5-1159O4.1	0.715393	1.40796	0.96701	0.888744	0.850334	0.355738	0.543703	0.103344	0.245951	0.174921	0	0.33869	0.372359	0.454002	0.490473	0	0.294787	0.342798	No
RP5-884G6.2	0.444357	0.847046	1.00084	1.15312	0.741965	0.164983	0.175315	0.146324	0.0864282	0	0	0.346695	0.366152	0.450249	0.49544	0	0.136853	0.396085	No
RUSC1-AS1	1.15507	1.37122	1.35325	2.0871	1.4415	0.944989	0.660739	0.716422	0.635416	0.760796	0.770802	0.333848	0.808084	0.216256	0.863588	0	0.501929	0.403958	No
SCGB1B2P	36.1826	82.6873	28.112	84.7532	58.201	0.550895	3.81389	1.13941	6.35383	3.97476	0.579282	8.28939	1.01969	1.88627	4.71834	0	0.0546078	0.0568849	No
SLCO4A1-AS1	0.925743	0.719996	1.07021	0.774228	0.692944	0.45096	0.243487	0.14348	2.94061e-54	0.544264	0.472917	0.0942619	2.66705e-92	0.115093	0.38771	0	0.330421	0.255786	No
ST3GAL5-AS1	1.08653	1.30615	1.95574	1.23577	1.01452	0.190027	0.468942	0.393701	0.331315	0.689489	0.0663458	0.863615	0.210511	0.484353	0.271889	0	0.314224	0.287437	No
STX18-AS1	2.82597	4.10754	3.10103	5.46882	2.76956	0.918705	1.07348	1.11414	1.07293	1.1721	0.512586	2.14527	0.625876	1.37861	1.51585	0	0.292857	0.338106	No
TAPT1-AS1	2.41198	2.90103	1.46078	4.18178	1.98628	0.927162	1.0796	0.733782	0.467034	0.969814	0.531159	0.564789	0.633072	0.202147	1.14802	0	0.322782	0.237925	No
TMEM254-AS1	1.13026	0.617099	0.729956	0.623203	0.964577	0.11154	0.158785	0.111953	0.36998	0.414755	0.326646	0.64451	0.405927	0.375527	0.588855	0	0.287081	0.575993	No
TMEM9B-AS1	3.57068	2.98467	3.78988	5.48581	2.46947	1.00779	0.46084	0.831664	0.88741	1.42652	0.717446	1.21777	0.886544	1.16209	1.05925	0	0.252136	0.275572	No
TOB1-AS1	1.29488	0.819868	0.808858	0.861896	1.46568	0.337136	0.354298	0.166563	0.31284	0.480467	0.312773	0.352705	0.496833	0.573402	0.386188	0	0.314463	0.404081	No
TOPORS-AS1	1.36687	0.872624	0.784495	0.741059	2.66721	1.69407	4.49235	2.1783	1.78337	1.97332	4.79531	4.48615	6.40624	5.00232	4.23586	0	1.88447	3.87514	No
TP73-AS1	2.09583	3.26942	4.11505	8.05545	3.74593	1.49529	1.18238	1.81573	1.83064	2.61298	1.23964	1.57936	1.74609	1.57667	1.83887	0	0.41994	0.375	No
TTC28-AS1	0.979333	1.14581	0.619121	0.476743	0.947845	0.0918533	0.780628	0.109042	0.770817	7.15843e-21	0.154446	8.85662e-28	6.3844e-153	0.8831	0.631848	0	0.420341	0.400445	No
U2	22.7537	55.8892	19.9122	18.9064	29.7026	117.328	158.013	108.742	138.805	105.637	95.3301	109.674	88.5538	87.2241	88.1848	0	4.27091	3.18669	No
URB1-AS1	2.68689	3.20761	3.70977	4.87332	3.38461	2.09772	1.7234	1.50089	1.58423	1.95935	2.86655	2.56546	2.3228	2.80121	1.85114	0	0.496332	0.694604	No
USP27X-AS1	0.690609	0.665274	0.845812	0.714751	0.632144	0.413365	0.37595	0.256023	0.393381	0.247701	0.35545	0.394116	0.198302	0.196641	0.324434	0	0.475237	0.413951	No
VIM-AS1	66.8539	228.705	181.02	278.746	109.886	83.2952	100.056	78.7137	98.2692	66.4714	178.293	158.149	185.702	216.82	180.17	0	0.493296	1.06232	No
WARS2-IT1	0.541614	0.729037	0.647191	0.316393	0.383907	0.0191028	0.0599559	0.0510202	0.0199125	0.0188082	0.0795504	0.0598499	0.042159	0.0627002	0.0328408	0	0.0644731	0.105839	No
XXbac-BPG252P9.9	4.42487	5.172	3.37962	3.56429	4.90749	7.48344	7.50736	7.10246	5.80441	7.91704	11.5565	9.33798	8.9342	12.5434	8.08553	0	1.66982	2.35253	No
XXyac-YX65C7_A.2	1.69355	2.03885	1.44411	1.57901	1.35674	0.746707	0.393246	0.829598	0.536308	0.507033	0.390161	0.537541	0.361366	0.357071	0.440921	0	0.3714	0.257272	No
YG039	0.284316	0.648266	0.327609	0.419219	0.258412	0.19646	0.275907	0.0605856	0.228205	0.178317	0.0628338	0.244361	0.133274	0.0827048	0.227407	0	0.48481	0.387332	No
YS049	1.41332	1.00012	1.25506	0.888666	0.721437	1.10098	0.123734	0.81924	4.57153e-07	1.11709	0.989999	0.454102	1.07653	1.07585	0.968906	0	0.598841	0.864885	No
SNHG19	37.4209	31.373	21.7887	19.0758	27.3736	12.1044	13.3217	16.9661	13.1642	27.8946	41.5062	31.2706	34.9801	36.8968	34.4227	0	0.608989	1.30682	No
