# Supplementary material for: The lncRNA SNHG26 drives the inflammatory-to-proliferative state transition of keratinocyte progenitor cells during wound healing
Source: Research Square preprint supplement (doi:10.21203/rs.3.rs-3810067/v1), 2024-03-04
Supplement: Supplementary file 6 [file d89ca1daf2a313b81ee0d176.xlsx]

## Sheet: Inflammation
Table S4. Genes used for calculating the inflammation score.
Ackr4
Acta2
Adamts5
Ahr
Akap13
Apoe
Ar
Arf6
Atf3
B2M
Bcl10
Bcl3
Bin1
Birc3
Bmp2
Bmp4
Btg2
Cacnb3
Card10
Card14
Casp1
Casp8
Cav1
Ccl2
Ccl27A
Ccl3
Ccl5
Ccl6
Ccl7
Ccl8
Ccl9
Ccnd2
Cd74
Cdkn1A
Cebpb
Cish
Cldn1
Cldn4
Clu
Col1A1
Col1A2
Col3A1
Creb5
Cxcl12
Cxcl14
Cxcl16
Cxcl2
Cxcl5
Ddit3
Dusp1
Dusp5
Dusp8
Ech1
Edn1
Eef2
Efna1
Elk4
Ezr
F2Rl1
Fam110A
Fas
Fbxw7
Fgf13
Fgfr1
Flnb
Fos
Fosb
Fosl1
Foxn3
Foxo1
Gab1
Gadd45A
Gadd45B
Gas6
Gata3
Glul
Gnb2
Gpat4
Hcar2
Hspa1A
Hspa1B
Hspb1
Icam1
Ifi35
Ifnar2
Ifngr1
Ifngr2
Igbp1
Il12Rb2
Il17Ra
Il18
Il1Rn
Il6St
Imp3
Insr
Irak3
Irf1
Irf6
Irf9
Jag1
Jak1
Jun
Junb
Jund
Kifc3
Lars2
Lgals9
Lifr
Litaf
Malt1
Map2K4
Map2K5
Map3K11
Map3K4
Map3K8
Mcl1
Mmp14
Mmp2
Mtch1
Myc
Naca
Ndfip1
Ndfip2
Nfatc1
Nfkb2
Nfkbia
Nfkbib
Nod2
Nr1D1
Nr4A1
Ntf3
Nup62
Parp1
Parp14
Parp9
Pdgfa
Peli1
Peli2
Per1
Phf20
Pik3Cb
Pik3R1
Pik3R2
Pim1
Pink1
Pja2
Pla2G4A
Plcb3
Plk2
Ppp1R13L
Prkacb
Psmb8
Ptk2
Ptpn1
Ptpn2
Rab7B
Rara
Rasa3
Rel
Rela
Rell1
Ripk2
Ripk4
Ror1
Rora
Rras
S100A8
S100A9
Sash1
Sdc4
Sh2B3
Sirt1
Slc9A3R1
Slco3A1
Smad4
Socs3
Sos2
Sphk2
Spred2
Spry1
Sqstm1
Srf
Stk38
Stk40
Tgfb1
Tgfb2
Timp1
Timp2
Timp3
Tnfaip3
Tnfrsf19
Tnip1
Traf2
Traf5
Trim25
Tshz1
Tslp
Uba52
Wls
Wnt10A
Wnt16
Wnt3
Zc3H12A
Zmynd11
Atf3
Ifrd1
Rel
Tnfaip3
Il1R2
Il6St
Csf
Tnfa
Tgfa
Tgfb
Pdgf

## Sheet: Proliferation
Table S4. Genes used for calculating the proliferation score.
Zwint
E2f1
Fen1
Foxm1
H2az1
Hmgb2
Mcm2
Mcm3
Mcm4
Mcm5
Mcm6
Mki67
Mybl2
Pcna
Plk1
Ccnd1
Aurka
Bub1
Top2a
Tyms
Dek
Ccnb1
Ccne1

## Sheet: Migration
Table S4. Genes used for calculating the migration score.
Has2
Krt16
Krt6a
Krt6b
Krt6c
Fgf7
Mapre2
Iqsec1
Fgf10
Adam9
Mmp9
