# Supplementary material for: The lncRNA SNHG26 drives the inflammatory-to-proliferative state transition of keratinocyte progenitor cells during wound healing
Source: Research Square preprint supplement (doi:10.21203/rs.3.rs-3810067/v1), 2024-03-04
Supplement: Supplementary file 7 [file eb917fb70ef14cae75f9abea.xlsx]

## Sheet: PeakCalling_qValue<0.05
Table S6. Enriched peaks in SNHG26 ChIRP-seq
Peak_IDs	width	annotation	geneStart	geneEnd	geneLength	geneStrand	geneId	transcriptId	distanceToTSS	ENSEMBL	SYMBOL	GENENAME	signalValue_Test1	-Log10(qValue)_Test1	signalValue_Test2	-Log10(qValue)_Test2
chr1_11522011_11523405	1395	Intron (ENST00000294484.7/57540, intron 10 of 20)	11533676	11537225	3550	1	57540	ENST00000304391.6	-10271	ENSG00000204624	DISP3	dispatched RND transporter family member 3	9.48437	14.4039	3.38519	0.88223
chr1_17078959_17079360	402	3' UTR	17067600	17075351	7752	2	11240	ENST00000479534.5	-3608	ENSG00000117115	PADI2	peptidyl arginine deiminase 2	2.84718	0.38029	3.10119	0.55478
chr1_209623045_209624001	957	Exon (ENST00000356082.9, exon 15 of 23)	209614870	209652425	37556	2	3914	ENST00000356082.9	0	ENSG00000196878	LAMB3	Laminin Subunit Beta 3	3.30036	1.86859	4.5198	3.33143
chr1_226960493_226961323	831	Intron (ENST00000676884.1/5664, intron 19 of 27)	226974855	226977487	2633	1	56997	ENST00000476488.1	-13532	ENSG00000163050	COQ8A	coenzyme Q8A	3.51596	1.08835	6.39425	7.11424
chr1_27603522_27604328	807	Promoter (<=1kb)	27534035	27603592	69558	2	27245	ENST00000247087.10	0	ENSG00000126705	AHDC1	AT-hook DNA binding motif containing 1	5.03429	3.32022	5.04274	4.37297
chr10_102813067_102813893	827	3' UTR	102830948	102831703	756	2	1586	ENST00000469683.1	17810	ENSG00000148795	CYP17A1	cytochrome P450 family 17 subfamily A member 1	3.41415	1.26964	4.42678	2.50729
chr10_114600425_114600857	433	Intron (ENST00000533213.7/3983, intron 2 of 22)	114595002	114610717	15716	2	3983	ENST00000477638.1	9860	ENSG00000099204	ABLIM1	actin binding LIM protein 1	3.6982	1.01339	3.92104	1.47493
chr10_43119709_43120641	933	3' UTR	43109207	43120912	11706	1	5979	ENST00000683872.1	10502	ENSG00000165731	RET	ret proto-oncogene	4.54397	2.93282	14.8508	38.4115
chr11_65866670_65867231	562	Promoter (<=1kb)	65866441	65867080	640	2	30008	ENST00000527277.5	0	ENSG00000172638	EFEMP2	EGF containing fibulin extracellular matrix protein 2	2.65442	0.41371	3.69545	1.40714
chr11_77087044_77088369	1326	Promoter (2-3kb)	77084965	77112911	27947	1	726	ENST00000533889.1	2079	ENSG00000149260	CAPN5	calpain 5	6.1011	5.73378	2.66916	0.50312
chr12_109782239_109783314	1076	3' UTR	109734166	109773508	39343	2	84983	ENST00000541723.5	-8731	ENSG00000255650	FAM222A-AS1	FAM222A antisense RNA 1	3.25153	0.87567	4.163	3.27856
chr12_112965714_112966178	465	Promoter (2-3kb)	112968244	112973250	5007	1	4940	ENST00000549918.2	-2066	ENSG00000111331	OAS3	2'-5'-oligoadenylate synthetase 3	2.98896	0.55377	3.48537	0.86219
chr12_30457061_30457723	663	Intron (ENST00000551867.1/ENST00000551867.1, intron 1 of 2)	30294447	30296707	2261	2	105369717	ENST00000551287.1	-160354		LINC02386	long intergenic non-protein coding RNA 2386	3.22052	0.55377	4.35672	2.1862
chr15_100710134_100710981	848	Distal Intergenic	100716249	100828497	112249	1	105371024	ENST00000559755.1	-5268		LOC105371024	uncharacterized LOC105371024	6.00957	4.96328	5.42046	4.35205
chr15_20303960_20304677	718	Intron (ENST00000656782.1/ENST00000656782.1, intron 1 of 2)	20283496	20291558	8063	1	646096	ENST00000554701.2	20464	ENSG00000259156	CHEK2P2	CHEK2 pseudogene 2	6.47185	5.93963	8.39392	14.3156
chr15_91748445_91750611	2167	Distal Intergenic	91643017	91649114	6098	2	105370973	ENST00000555396.1	-99331		LOC105370973	uncharacterized LOC105370973	4.56552	2.32724	40.8619	134.371
chr16_82396833_82397391	559	Distal Intergenic	82491738	82575490	83753	2	101928392	ENST00000650164.1	178099	ENSG00000261285	LOC101928392	uncharacterized LOC101928392	3.25153	0.87567	2.85332	0.40527
chr17_17514367_17514840	474	Intron (ENST00000484838.6/10400, intron 1 of 4)	17505563	17518157	12595	2	10400	ENST00000484838.6	3317	ENSG00000133027	PEMT	phosphatidylethanolamine N-methyltransferase	3.85553	1.80818	3.82232	2.1028
chr17_72678236_72678729	494	Intron (ENST00000255559.8/201266, intron 7 of 9)	72642731	72644490	1760	1	105371887	ENST00000584975.2	35505		LOC105371887	uncharacterized LOC105371887	3.98586	1.62399	4.80409	3.48276
chr17_8828220_8829002	783	3' UTR	8797110	8799365	2256	2	162387	ENST00000329805.6	-28855	ENSG00000185156	MFSD6L	major facilitator superfamily domain containing 6 like	4.69841	2.64842	2.83506	0.39185
chr18_12085969_12088020	2052	Distal Intergenic	12093843	12129764	35922	1	342850	ENST00000587848.3	-5823	ENSG00000181626	ANKRD62	ankyrin repeat domain 62	4.21098	1.85327	6.73882	7.27965
chr19_38327084_38327678	595	3' UTR	38320243	38325489	5247	1	9424	ENST00000588137.1	6841	ENSG00000099337	KCNK6	potassium two pore domain channel subfamily K member 6	5.31587	3.73354	3.11402	1.29972
chr19_5039968_5040524	557	Exon (ENST00000611640.4/23030, exon 4 of 24)	5046998	5082437	35440	1	23030	ENST00000592175.5	-6474	ENSG00000127663	KDM4B	lysine demethylase 4B	2.7901	0.31086	3.11379	0.79088
chr2_100015802_100016721	920	Intron (ENST00000409236.6/3899, intron 2 of 22)	100006149	100007951	1803	2	3899	ENST00000498090.1	-7851	ENSG00000144218	AFF3	ALF transcription elongation factor 3	3.58727	1.01339	3.92104	1.47493
chr2_233462892_233463403	512	Promoter (<=1kb)	233463814	233467150	3337	1	8527	ENST00000495901.1	-411	ENSG00000077044	DGKD	diacylglycerol kinase delta	5.47054	4.50053	7.33242	10.2149
chr20_46050352_46050744	393	Intron (ENST00000454036.6/57468, intron 17 of 25)	46055847	46056510	664	1	57468	ENST00000628413.1	-5103	ENSG00000124140	SLC12A5	solute carrier family 12 member 5	3.56346	1.01339	7.16172	10.7826
chr20_47946077_47946646	570	Distal Intergenic	47950797	47953399	2603	1	105372637	ENST00000666669.1	-4151		LOC105372637	uncharacterized LOC105372637	5.53495	4.90139	3.48537	0.86219
chr20_53877302_53877830	529	Promoter (1-2kb)	53875252	53875557	306	2	391257	ENST00000497904.1	-1745		SUMO1P1	SUMO1 pseudogene 1	3.10093	0.55377	4.16958	1.96444
chr21_32315880_32316446	567	Intron (ENST00000382751.4/9875, intron 38 of 38)	32306464	32308737	2274	2	105372779	ENST00000450936.1	-7143		MRAP-AS1	MRAP antisense RNA 1	3.23188	0.6503	3.55127	1.39092
chr4_144153465_144153781	317	Intron (ENST00000641741.2/105377460, intron 11 of 12)	144109304	144140751	31448	2	2993	ENST00000360771.8	-12714	ENSG00000170180	GYPA	glycophorin A (MNS blood group)	2.93667	0.41371	3.75263	1.32557
chr4_40010836_40011432	597	Distal Intergenic	39898014	39977956	79943	2	23244	ENST00000503396.5	-32880	ENSG00000121892	PDS5A	PDS5 cohesin associated factor A	3.32025	0.96597	3.97382	1.72943
chr4_81946774_81947193	420	Intron (ENST00000638048.1/153020, intron 1 of 16)	81427065	82044069	617005	2	153020	ENST00000638048.1	96876	ENSG00000138670	RASGEF1B	RasGEF domain family member 1B	3.35619	0.74794	7.08829	8.18578
chr6_168364978_168365441	464	Distal Intergenic	168306904	168319777	12874	2	168002	ENST00000366795.4	-45201	ENSG00000164488	DACT2	dishevelled binding antagonist of beta catenin 2	3.57668	1.29989	3.5704	1.28942
chr6_170027590_170028382	793	Distal Intergenic	170147195	170150941	3747	1	101929614	ENST00000687232.1	-118813	ENSG00000289623	LOC101929614	proline-rich receptor-like protein kinase PERK10	4.87288	2.904	8.71343	11.9786
chr7_100175812_100176265	454	Promoter (<=1kb)	100171651	100175785	4135	2	221914	ENST00000490629.5	-27	ENSG00000213420	GPC2	glypican 2	5.3124	4.87205	3.39198	0.86037
chr7_119983476_119983997	522	Distal Intergenic	119750809	119907397	156589	2	105375475	ENST00000426413.2	-76079	ENSG00000225546	LINC02476	long intergenic non-protein coding RNA 2476	4.61477	2.54105	2.8973	0.69277
chr7_22860540_22861616	1077	Exon (ENST00000415611.9/109729180, exon 4 of 4)	22856613	22856686	74	1	692210	ENST00000408813.1	3927	ENSG00000221740	SNORD93	small nucleolar RNA, C/D box 93	14.7928	28.3862	10.5356	26.0875
chr7_45181295_45182045	751	Intron (ENST00000242249.8/10268, intron 2 of 2)	45157829	45186302	28474	1	10268	ENST00000481345.1	23466	ENSG00000122679	RAMP3	receptor activity modifying protein 3	5.20244	4.69066	3.64002	1.47493
chr8_142742317_142742733	417	Promoter (<=1kb)	142740949	142742406	1458	2	57152	ENST00000246515.2	0	ENSG00000126233	SLURP1	secreted LY6/PLAUR domain containing 1	3.98586	1.62399	2.54491	0.6572
chr8_143923368_143923864	497	Exon (ENST00000345136.8/5339, exon 31 of 32)	143915153	143939597	24445	2	5339	ENST00000345136.8	15733	ENSG00000178209	PLEC	plectin	4.01268	1.62399	4.84265	4.06863
chr8_23714517_23715081	565	Exon (ENST00000662066.1/101929258, exon 4 of 4)	23707141	23789487	82347	1	107986930	ENST00000523874.1	7376		LOC107986930	uncharacterized LOC107986930	2.91537	0.87383	4.35672	2.1862
chr9_121507843_121508327	485	Distal Intergenic	121455040	121499844	44805	2	2681	ENST00000481799.6	-7999	ENSG00000204136	GGTA1	glycoprotein alpha-galactosyltransferase 1 (inactive)	4.8935	3.67137	2.92875	0.40834
chrX_68990493_68990963	471	Distal Intergenic	68829021	68842160	13140	1	1947	ENST00000204961.5	161472	ENSG00000090776	EFNB1	ephrin B1	3.25153	0.87567	3.26093	0.74728

## Sheet: List of peaks in heatmap(Fig6C)
Table S6. Enriched peaks in SNHG26 ChIRP-seq (List of peaks in heatmap Fig6C)
#chrom	start	end	name	thickStart	thickEnd	itemRGB	blockCount	blockSizes	blockStart
chr15	91748445	91750611	chr15:91748445-91750611	91748445	91750611	0	1	2166	91748436
chr18	12085969	12088020	chr18:12085969-12088020	12085969	12088020	0	1	2051	12085968
chr10	43119709	43120641	chr10:43119709-43120641	43119709	43120641	0	1	932	43119705
chr1	209623045	209624001	chr1:209623045-209624001	209623045	209624001	0	1	956	209623043	LAMB3
chr1	226960493	226961323	chr1:226960493-226961323	226960493	226961323	0	1	830	226960491
chr15	20303960	20304677	chr15:20303960-20304677	20303960	20304677	0	1	717	20303958
chr11	77087044	77088369	chr11:77087044-77088369	77087044	77088369	0	1	1325	77087037
chr8	143923368	143923864	chr8:143923368-143923864	143923368	143923864	0	1	496	143923367
chr1	11522011	11523405	chr1:11522011-11523405	11522011	11523405	0	1	1394	11522010
chr12	109782239	109783314	chr12:109782239-109783314	109782239	109783314	0	1	1075	109782238
chr7	22860540	22861616	chr7:22860540-22861616	22860540	22861616	0	1	1076	22860538	SNORD93/SNHG26
chr7	45181295	45182045	chr7:45181295-45182045	45181295	45182045	0	1	750	45181291
chr2	233462892	233463403	chr2:233462892-233463403	233462892	233463403	0	1	511	233462890
chr11	65866670	65867231	chr11:65866670-65867231	65866670	65867231	0	1	561	65866664
chr17	17514367	17514840	chr17:17514367-17514840	17514367	17514840	0	1	473	17514366
chr10	102813067	102813893	chr10:102813067-102813893	102813067	102813893	0	1	826	102813066
chr1	27603522	27604328	chr1:27603522-27604328	27603522	27604328	0	1	806	27603520
chr19	38327084	38327678	chr19:38327084-38327678	38327084	38327678	0	1	594	38327081
chr20	46050352	46050744	chr20:46050352-46050744	46050352	46050744	0	1	392	46050348
chrX	68990493	68990963	chrX:68990493-68990963	68990493	68990963	0	1	470	68990487
chr15	100710134	100710981	chr15:100710134-100710981	100710134	100710981	0	1	847	100710133
chr8	142742317	142742733	chr8:142742317-142742733	142742317	142742733	0	1	416	142742316
chr9	121507843	121508327	chr9:121507843-121508327	121507843	121508327	0	1	484	121507842
chr4	40010836	40011432	chr4:40010836-40011432	40010836	40011432	0	1	596	40010832
chr17	72678236	72678729	chr17:72678236-72678729	72678236	72678729	0	1	493	72678229
chr17	8828220	8829002	chr17:8828220-8829002	8828220	8829002	0	1	782	8828212
chr21	32315880	32316446	chr21:32315880-32316446	32315880	32316446	0	1	566	32315877
chr6	168364978	168365441	chr6:168364978-168365441	168364978	168365441	0	1	463	168364977
chr20	47946077	47946646	chr20:47946077-47946646	47946077	47946646	0	1	569	47946073
chr7	100175812	100176265	chr7:100175812-100176265	100175812	100176265	0	1	453	100175811
chr6	170027590	170028382	chr6:170027590-170028382	170027590	170028382	0	1	792	170027589
chr19	5039968	5040524	chr19:5039968-5040524	5039968	5040524	0	1	556	5039963
chr12	112965714	112966178	chr12:112965714-112966178	112965714	112966178	0	1	464	112965713
chr1	17078959	17079360	chr1:17078959-17079360	17078959	17079360	0	1	401	17078958
chr2	100015802	100016721	chr2:100015802-100016721	100015802	100016721	0	1	919	100015801
chr7	119983476	119983997	chr7:119983476-119983997	119983476	119983997	0	1	521	119983475
chr8	23714517	23715081	chr8:23714517-23715081	23714517	23715081	0	1	564	23714515
chr16	82396833	82397391	chr16:82396833-82397391	82396833	82397391	0	1	558	82396825
chr20	53877302	53877830	chr20:53877302-53877830	53877302	53877830	0	1	528	53877297
chr10	114600425	114600857	chr10:114600425-114600857	114600425	114600857	0	1	432	114600424
chr4	81946774	81947193	chr4:81946774-81947193	81946774	81947193	0	1	419	81946766
chr4	144153465	144153781	chr4:144153465-144153781	144153465	144153781	0	1	316	144153464
chr12	30457061	30457723	chr12:30457061-30457723	30457061	30457723	0	1	662	30457058
